# Supplementary material for: RANBP9 and RANBP10 cooperate in regulating non-small cell lung cancer proliferation
Source: J Exp Clin Cancer Res. 2025 Aug 29;44:259. doi: 10.1186/s13046-025-03491-8 (PMC12395873; doi:10.1186/s13046-025-03491-8)
Supplement: Supplementary file 11 — Supplementary Material 11. [file 13046_2025_3491_MOESM11_ESM.xlsx]

## Sheet: NSLC ALL 50
Patient ID		Tissue Type	Review Dx	% Tumor	% stroma	% necrosis	Tissue Type	Review Dx	% Tumor	% stroma	% necrosis		BLOT
P112362651	21-22	Primary	Adenocarcinoma	95	5	0	Normal	Normal	0	100	0		1
P112372685	27-28	Primary	Adenocarcinoma	80	20	0	Normal	Normal	0	100	0		1
P112385081	37-38	Primary	Adenocarcinoma	80	20	0	Normal	Normal	0	100	0		2
P112394761	45-46	Primary	Adenocarcinoma	70	30	0	Normal	Normal	0	100	0		2
P112359287	51-52	Primary	Adenocarcinoma	70	30	0	Normal	Normal	0	100	0		9
P112362434	55-56	Primary	Adenocarcinoma	70	30	0	Normal	Normal	0	100	0		9
P112362666	57-58	Primary	Adenocarcinoma	80	20	0	Normal	Normal	0	100	0		9
P112363900	59-60	Primary	Adenocarcinoma	80	20	0	Normal	Normal	0	100	0		10
P112364148	61-62	Primary	Adenocarcinoma	80	20	0	Normal	Normal	0	100	0		10
P112364941	65-66	Primary	Adenocarcinoma	80	20	0	Normal	Normal	0	100	0		10
P112374927	67-68	Primary	Adenocarcinoma	80	20	0	Normal	Normal	0	100	0		11
P112363113	71-72	Primary	Adenocarcinoma	70	30	0	Normal	Normal	0	100	0		11
P112365306	73-74	Primary	Adenocarcinoma	90	10	0	Normal	Normal	0	100	0		11
P112377306	81-82	Primary	Adenocarcinoma	90	10	0	Normal	Normal	0	100	0		12
P112361613	9-10	Primary	Adenocarcinoma	80	20	0	Normal	Normal	0	100	0		1
P112397094	99-100	Primary	Adenocarcinoma	85	15	0	Normal	Normal	0	100	0		12
P112394386	43-44	Primary	Adenocarcinoma with mixed subtypes	80	20	0	Normal	Normal	0	100	0		2
P112395750	47-48	Primary	Adenocarcinoma with mixed subtypes	80	20	0	Normal	Normal	0	100	0		3
P112396562	49-50	Primary	Adenocarcinoma with mixed subtypes	70	30	0	Normal	Normal	0	100	0		3
P112372299	75-76	Primary	Adenocarcinoma with mixed subtypes	90	10	0	Normal	Normal	0	100	0		13
P112372811	77-78	Primary	Adenocarcinoma with mixed subtypes	90	10	0	Normal	Normal	0	100	0		13
P112380388	85-86	Primary	Adenocarcinoma with mixed subtypes	75	25	0	Normal	Normal	0	100	0		14
P112384232	91-92	Primary	Adenocarcinoma with mixed subtypes	95	5	0	Normal	Normal	0	100	0		13
P112384815	93-94	Primary	Adenocarcinoma with mixed subtypes	85	15	0	Normal	Normal	0	100	0		14
P112361970	11-12	Primary	Adenosquamous carcinoma	95	5	2	Normal	Normal	0	100	0		5
P112385663	39-40	Primary	Adenosquamous carcinoma	80	20	0	Normal	Normal	0	100	0		5
P112394586	97-98	Primary	Adenosquamous carcinoma	95	5	0	Normal	Normal	0	100	0		13
P112378112	29-30	Primary	Carcinoid tumor	100	0	0	Normal	Normal	0	100	0		8
P112383359	87-88	Primary	Carcinoid, NOS	90	10	0	Normal	Normal	0	100	0		16
P112360623	1-2	Primary	Carcinoma	80	20	0	Normal	Normal	0	100	0		4
P112362063	13-14	Primary	Carcinoma	80	20	0	Normal	Normal	0	100	0		5
P112361453	5-6	Primary	Carcinoma	80	20	0	Normal	Normal	0	100	0		4
P112361456	7-8	Primary	Carcinoma	70	30	0	Normal	Normal	0	100	0		4
P112376385	69-70	Primary	Mucinous adenocarcinoma	100	0	0	Normal	Normal	0	100	0		14
P112387762	95-96	Primary	Neuroendocrine carcinoma, low grade	95	5	0	Normal	Normal	0	100	0		17
P112360767	3-4	Primary	Non-small cell carcinoma	70	20	10	Normal	Normal	0	100	0		3
P112374787	79-80	Primary	Papillary squamous cell carcinoma	95	5	0	Normal	Normal	0	100	0		17
P112381839	33-34	Primary	Pleomorphic carcinoma	80	10	10	Normal	Normal	0	100	0		17
P112362067	15-16	Primary	Squamous cell carcinoma	90	5	5	Normal	Normal	0	100	0		6
P112362276	17-18	Primary	Squamous cell carcinoma	80	10	10	Normal	Normal	0	100	0		6
P112362321	19-20	Primary	Squamous cell carcinoma	70	30	0	Normal	Normal	0	100	0		6
P112364429	23-24	Primary	Squamous cell carcinoma	70	10	20	Normal	Normal	0	100	0		7
P112380636	31-32	Primary	Squamous cell carcinoma	80	20	0	Normal	Normal	0	100	0		7
P112387588	41-42	Primary	Squamous cell carcinoma	80	20	0	Normal	Normal	0	100	0		7
P112360668	53-54	Primary	Squamous cell carcinoma	70	30	0	Normal	Normal	0	100	0		15
P112364436	63-64	Primary	Squamous cell carcinoma	80	20	0	Normal	Normal	0	100	0		15
P112365544	25-26	Primary	Typical carcinoid	90	10	0	Normal	Normal	0	100	0		8
P112384924	35-36	Primary	Typical carcinoid	95	5	0	Normal	Normal	0	100	0		8
P112378287	83-84	Primary	Typical carcinoid	100	0	0	Normal	Normal	0	100	0		16
P112383854	88-90	Primary	Typical carcinoid	90	10	0	Normal	Normal	0	100	0		16
