# Supplementary material for: RANBP9 and RANBP10 cooperate in regulating non-small cell lung cancer proliferation
Source: J Exp Clin Cancer Res. 2025 Aug 29;44:259. doi: 10.1186/s13046-025-03491-8 (PMC12395873; doi:10.1186/s13046-025-03491-8)
Supplement: Supplementary file 12 — Supplementary Material 12. [file 13046_2025_3491_MOESM12_ESM.xlsx]

## Sheet: Ubiquitylation Associations
Peptide IDs					A549 Ubiquitin Analysis										A549 Total Protein Analysis						CPTAC LUSQ Total Protein Analysis								CPTAC LUAD Total Protein Analysis
Original A549 Proteomics ID	geneSymbol	UbiqSites	A549 UbiqSite	Proliferation Associated Proteins	RANBP9.CTL.avg	RANBP9.DOX.avg	RANBP10.CTL.avg	RANBP10.DOX.avg	RANBP9.Log2FC	RANBP9.t.test.Log10pval	RANBP10.Log2FC	RANBP10.t.test.Log10pval	RANP9vRANBP10.Log2FC	RANP9vRANBP10.t.test.Log10pval	RANBP9 Log2FC	RANBP9 log10 p.value	RANBP10 Log2FC	RANBP10 log10 p.value	RANBP9 vs RANBP10 Log2FC	RANBP10 log10 p.value	RANBP9 estimate	RANBP9 log10 p.value	RANBP10 estimate	RANBP10 log10 p.value	GID8 estimate	GID8 log10 p.value	RANBPDIFF estimate	RANBPDIFF log10 p.value	RANBP9 estimate	RANBP9 log10 p.value	RANBP10 estimate	RANBP10 log10 p.value	GID8 estimate	GID8 log10 p.value	RANBPDIFF estimate	RANBPDIFF log10 p.value
Q9NRG9.VQDGkPVILLFR	AAAS	K425k	AAAS.K425k		3	4.75	5.75	4.25	0.621488	1.16176	-0.415037	-1.36094	-0.415037	2.04264	-0.0182651	-0.0702265	0.0866078	0.355897	-0.104873	-0.480436
Q9NRG9.VYNASSTIVPSLkHR	AAAS	K189k	AAAS.K189k		1.25	2	1.5	1	0.584963	0.748885	-0.485427	-0.740669	-0.485427	1.26033	-0.12913	-0.926757	-0.154321	-0.539032	0.0251917	0.107327	-0.163562	-1.04212	-0.00398307	-0.0144091	-0.270188	-2.32939	-0.0615762	-0.512296	-0.0743187	-0.356215	-0.0130398	-0.0494164	-0.0944132	-0.486056	-0.0275327	-0.173883
Q9NRG9.GcVGGAkSATIVADLSETTIQTPDGEER	AAAS	K373k	AAAS.K373k		2.25	1.5	2.5	1.75	-0.514573	-1.00815	-0.459432	-1.00815	-0.0551416		0.103143	0.511005	0.0499889	0.433982	0.0531543	0.415198	0.150854	0.923961	0.0142608	0.0537747	0.174197	1.14642	0.0527068	0.417243	-0.0342258	-0.141093	-0.0826113	-0.407945	-0.167251	-1.09293	0.0217396	0.132768
Q9NRG9.GGGVTNLLWSPDGSkILATTPSAVFR	AAAS	K301k	AAAS.K301k		2.5	2	3.5	2.5	-0.289507	-0.740669	-0.447459	-0.834908	-0.447459	-0.407821	-0.00701819	-0.068192	-0.046837	-0.742223	0.0398188	0.731179	0.358202	3.85065	0.188563	1.29536	0.509523	7.74842	0.0654579	0.556346	0.25543	2.15015	0.0220366	0.0865833	0.251412	2.09349	0.104864	0.988616
Q9NRG9.DPLkTPGR	AAAS	K56k	AAAS.K56k		0.5	0.25	0.75	0.25	-0.584963	-0.170176	-1	-0.683964	-1	-0.295831	0.090176	0.277226	-0.131887	-0.591456	0.222063	0.805966	-0.0725511	-0.341458	0.108856	0.581531	0.0901888	0.451888	-0.0699989	-0.609806	-0.0179843	-0.0695259	-0.0230767	-0.091046	-0.216115	-1.63165	0.00228802	0.0124376
Q9NRG9.LAVLMkGKPR	AAAS	K416k	AAAS.K416k		2.5	1	2.5	0.75	-1.1375	-0.726381	-1.45943	-1.17589	-1.45943	-0.204865	0.208531	1.56446	0.0219153	0.108079	0.186616	2.19932	-0.214963	-1.59392	-0.0342054	-0.139507	-0.284666	-2.54867	-0.0697482	-0.6068	-0.275284	-2.44293	0.0454961	0.195891	-0.182649	-1.25064	-0.144127	-1.61832
NA	AAAS	K52k	NA		NA	NA	NA	NA	NA	NA	NA	NA	NA		0.075681	0.831665	-0.206696	-1.95392	0.282377	2.45756	0.393989	4.60969	0.171339	1.1179	0.623849	12.2598	0.0859133	0.814046	0.340175	3.55783	-0.0129391	-0.0490151	0.302236	2.8756	0.158654	1.89314
Q86V21.LQQVVkGLPDLKK	AACS	K228k	AACS.K228k			0.5	1.5	0.5	1.58496	0.740669	-1.22239	-0.834908	-1.22239	1.29844	-0.0934873	-0.893601	0.0125895	0.0810298	-0.106077	-0.814729	0.156713	0.977572	0.186042	1.26855	0.360634	3.89947	-0.0113171	-0.0697919	0.276534	2.46208	0.0953328	0.492367	0.104998	0.5607	0.0814138	0.685653
Q86V21.QIIAGkAVEQGGAFSNPETLDLYR	AACS	K646k	AACS.K646k		0.5	0.5						NA			-0.202743	-1.23702	-0.0796692	-0.407874	-0.123074	-0.627365	0.142934	0.853812	0.248397	2.02053	0.437989	5.67126	-0.0406944	-0.300547	0.0867973	0.435042	-0.0912673	-0.464713	-0.0491827	-0.214758	0.0800045	0.669082
Q86V21.LQQVVkGLPDLK	AACS	K228k	AACS.K228k		2	2	1.75	2.5			0.459432	1.00815	0.459432	-0.72205	-0.00717681	-0.0254017	0.0364863	0.0721283	-0.0436631	-0.0941973	0.0800461	0.386983	0.205072	1.47821	0.230914	1.7905	-0.0482432	-0.37229	0.219799	1.67692	-0.0338846	-0.139501	0.186863	1.2957	0.11398	1.12074
Q86V21.GIADVPEWFkGSR	AACS	K95k	AACS.K95k		2	2	2.5	1			-1.1375	-1.12678	-1.1375	1.07957	0.0703553	0.836768	0.0272855	0.224511	0.0430698	0.66272	-0.240159	-1.91022	0.141735	0.843425	-0.257164	-2.14179	-0.14736	-1.87177	-0.337308	-3.50313	-0.0586563	-0.265416	-0.287026	-2.62631	-0.125198	-1.29479
NA	AACS	K24k	NA		NA	NA	NA	NA	NA	NA	NA	NA	NA		0.0644308	0.328474	-0.18039	-1.73383	0.244821	1.93694	0.398733	4.71708	0.163789	1.04429	0.622493	12.1953	0.090657	0.880148	0.358341	3.91678	0.00572464	0.0210579	0.317329	3.13644	0.158431	1.88873
NA	AACS	K489k	NA		NA	NA	NA	NA	NA	NA	NA	NA	NA		0.0644308	0.328474	-0.18039	-1.73383	0.244821	1.93694	0.398733	4.71708	0.163789	1.04429	0.622493	12.1953	0.090657	0.880148	0.358341	3.91678	0.00572464	0.0210579	0.317329	3.13644	0.158431	1.88873
Q86V21.VYDEVVDTSkGIADVPEWFK	AACS	K85k	AACS.K85k		1.5	1.5	0.25	0.75			1	0.396592	1	-0.384418							-0.0861506	-0.425587	-0.154803	-0.959927	-0.213559	-1.57721	0.0264905	0.179652	-0.13161	-0.768231	-0.175486	-1.17593	-0.297263	-2.79261	0.0197134	0.118975
Q6PD74.HGFELVELSPEELPEEDDDFPESTGVkR	AAGAB	K160k	AAGAB.K160k		0.25	0.25	0.5				-1.58496	-0.740669	-1.58496	0.855968	-0.124901	-1.16173	-0.135073	-2.07477	0.0101718	0.0786176	-0.0407226	-0.170299	-0.230318	-1.78293	-0.202826	-1.45258	0.0731583	0.648245	-0.169377	-1.11406	-0.0892774	-0.45141	-0.112788	-0.618467	-0.0359888	-0.238469
NA	AAMDC	K24k	NA		NA	NA	NA	NA	NA	NA	NA	NA	NA		0.0644308	0.328474	-0.18039	-1.73383	0.244821	1.93694	0.398733	4.71708	0.163789	1.04429	0.622493	12.1953	0.090657	0.880148	0.358341	3.91678	0.00572464	0.0210579	0.317329	3.13644	0.158431	1.88873
NA	AAMP	K246k	NA		NA	NA	NA	NA	NA	NA	NA	NA	NA		0.0644308	0.328474	-0.18039	-1.73383	0.244821	1.93694	0.398733	4.71708	0.163789	1.04429	0.622493	12.1953	0.090657	0.880148	0.358341	3.91678	0.00572464	0.0210579	0.317329	3.13644	0.158431	1.88873
Q9Y312.ANLQELDQFLGPYPYATLKk	AAR2	K132k	AAR2.K132k		0.5	0.5	0.25	1			1.32193	0.748885	1.32193	-0.72205	-0.0108974	-0.0364256	-0.0474754	-0.120717	0.036578	0.104236	0.36579	4.00427	-0.00588805	-0.0214661	0.487348	7.05318	0.143418	1.79006	0.317516	3.13975	0.0999484	0.524543	0.31938	3.17294	0.0977533	0.891231
NA	AARS	K74k	NA		NA	NA	NA	NA	NA	NA	NA	NA	NA		0.0644308	0.328474	-0.18039	-1.73383	0.244821	1.93694	0.398733	4.71708	0.163789	1.04429	0.622493	12.1953	0.090657	0.880148	0.358341	3.91678	0.00572464	0.0210579	0.317329	3.13644	0.158431	1.88873
NA	AARS	K81k	NA		NA	NA	NA	NA	NA	NA	NA	NA	NA		0.0644308	0.328474	-0.18039	-1.73383	0.244821	1.93694	0.398733	4.71708	0.163789	1.04429	0.622493	12.1953	0.090657	0.880148	0.358341	3.91678	0.00572464	0.0210579	0.317329	3.13644	0.158431	1.88873
NA	AARS	K384k	NA		NA	NA	NA	NA	NA	NA	NA	NA	NA		0.0644308	0.328474	-0.18039	-1.73383	0.244821	1.93694	0.398733	4.71708	0.163789	1.04429	0.622493	12.1953	0.090657	0.880148	0.358341	3.91678	0.00572464	0.0210579	0.317329	3.13644	0.158431	1.88873
NA	AARS	K558k	NA		NA	NA	NA	NA	NA	NA	NA	NA	NA		0.0644308	0.328474	-0.18039	-1.73383	0.244821	1.93694	0.398733	4.71708	0.163789	1.04429	0.622493	12.1953	0.090657	0.880148	0.358341	3.91678	0.00572464	0.0210579	0.317329	3.13644	0.158431	1.88873
NA	AARS	K625k	NA		NA	NA	NA	NA	NA	NA	NA	NA	NA		0.0644308	0.328474	-0.18039	-1.73383	0.244821	1.93694	0.398733	4.71708	0.163789	1.04429	0.622493	12.1953	0.090657	0.880148	0.358341	3.91678	0.00572464	0.0210579	0.317329	3.13644	0.158431	1.88873
NA	AARS	K677k	NA		NA	NA	NA	NA	NA	NA	NA	NA	NA		0.0644308	0.328474	-0.18039	-1.73383	0.244821	1.93694	0.398733	4.71708	0.163789	1.04429	0.622493	12.1953	0.090657	0.880148	0.358341	3.91678	0.00572464	0.0210579	0.317329	3.13644	0.158431	1.88873
P49588.ALNEALkLFK	AARS1	K876k	AARS1.K876k		1	1	1.5	1.75			0.192645	0.26967	0.192645	-0.14814	-0.166497	-0.830183	0.0403367	0.164977	-0.206834	-1.16443	-0.208106	-1.51321	-0.242402	-1.93991	-0.418454	-5.18146	0.0132336	0.0826153	-0.103753	-0.551693	-0.160999	-1.03195	-0.134798	-0.795047	0.0257206	0.160753
P49588.SVLGEADQkGSLVAPDR	AARS1	K625k	AARS1.K625k		3	6.25	3.5	5	1	1.84557	0.485427	1.12678	0.485427	1.31375	-0.125923	-1.18176	-0.0123512	-0.0702611	-0.113572	-0.920026	0.144334	0.866015	-0.0967791	-0.49613	-0.0358726	-0.147251	0.0930372	0.914242	0.143743	0.872599	0.065819	0.305835	0.00269843	0.00980343	0.0350114	0.230722
P49588.VDDSSEDkTEFTVK	AARS1	K558k	AARS1.K558k		2.25	2.5	1.5	1.75	0.137504	0.26967	0.192645	0.133486	0.192645		0.150121	2.05527	0.150228	1.2295	-0.000107101	-0.0349711	-0.0223715	-0.0871218	0.213367	1.57494	0.243646	1.9565	-0.0909636	-0.884505	-0.00795184	-0.0295182	0.211919	1.58092	-0.0578527	-0.260996	-0.098788	-0.905098
P49588.IVAVTGAEAQkALR	AARS1	K762k	AARS1.K762k		1.5	2.25	3	3	0.514573	1.00815				-0.423011	0.173563	0.737015	0.132075	0.448371	0.0414883	0.0176504	0.026857	0.10645	-0.137014	-0.803103	-0.118634	-0.654853	0.0632323	0.530906	-0.125475	-0.717811	0.0363929	0.151297	0.0271479	0.10885	-0.0727273	-0.58637
P49588.VDDSSEDKTEFTVkNAQVR	AARS1	K564k	AARS1.K564k		1.75	2	2.75	1.5	0.169925	0.204865	-0.777608	-1.75778	-0.777608	1.56321	0.144207	0.657476	0.0836055	0.313497	0.0606015	0.214891	0.101323	0.527599	-0.12088	-0.672238	0.0534706	0.234639	0.0857407	0.811687	-0.084277	-0.418648	0.0506915	0.222615	0.0473286	0.20521	-0.0606414	-0.459359
P49588.FDFTAkGAmSTQQIK	AARS1	K641k	AARS1.K641k		2.25	2	0.5	1.75	-0.152003	-0.195439	1.41504	1.75778	1.41504	-2.03279	0.379891	1.27031	0.250347	1.00297	0.129544	0.471297	0.261551	2.20397	-0.177684	-1.18172	0.193523	1.34896	0.169486	2.36876	0.00428603	0.0156732	0.0421145	0.178997	0.0469614	0.203334	-0.0169964	-0.10095
P49588.GGGkDVSAQATGK	AARS1	K934k	AARS1.K934k		0.25	2	0.5	0.75	2.16993	1.07291	0.415037	0.26967	0.415037	0.917082	0.0847126	0.808051	0.00654828	0.0365134	0.0781643	0.54653	0.118849	0.656511	-0.0922401	-0.465483	0.0855023	0.421422	0.0814522	0.754097	0.103653	0.550971	0.075181	0.361475	0.206219	1.51339	0.0127925	0.0741064
P49588.AVYTQDcPLAAAkAIQGLR	AARS1	K677k	AARS1.K677k		2.75	3.5	4.75	5	0.321928	1.00815	0.0703893	0.151697	0.0703893	-0.443709	0.337988	2.30358	0.129087	0.470291	0.208902	1.10276	0.0300312	0.120515	-0.0981421	-0.505487	-0.0409362	-0.171332	0.0494577	0.384333	-0.202101	-1.46558	-0.0787777	-0.383711	-0.242886	-1.97607	-0.0554092	-0.408279
P49588.DIINEEEVQFLkTLSR	AARS1	K384k	AARS1.K384k		0.5	0.5	0.25	0.75			1	0.396592	1	-0.384418							-0.295481	-2.72007	-0.177949	-1.18442	-0.553428	-9.28082	-0.0453517	-0.344179	-0.196131	-1.39771	-0.0629995	-0.289704	-0.273028	-2.40856	-0.0598159	-0.451146
P49588.PYTGkVGAEDADGIDMAYR	AARS1	K282k	AARS1.K282k		0.75	1.5	0.5	1.5	0.807355	1.00815	1.22239	0.834908	1.22239	-0.165091							-0.00697284	-0.0255329	0.0666567	0.307083	0.011811	0.0441015	-0.0284111	-0.194953	-0.072756	-0.346753	-0.179191	-1.21427	-0.126832	-0.728828	0.0478212	0.338277
Q9BTE6.LkTTSWELGR	AARSD1	K126k	AARSD1.K126k		0.25	0.5	0.5		0.584963	0.26967	-1.58496	-0.740669	-1.58496	1.09415	0.0611485	0.205209	0.0876706	0.45563	-0.0265221	-0.0625717	-0.137422	-0.806547	-0.134475	-0.781795	-0.247539	-2.00888	-0.00113725	-0.00656511	-0.0343329	-0.141594	-0.159764	-1.02011	-0.110398	-0.60049	0.0563561	0.417352
Q9BTE6.ALTALLkcGAEDHVEAVK	AARSD1	K265k	AARSD1.K265k		1.5	1.5	2	1.75			-0.169925	-0.407821	-0.169925	-0.26967	0.00188483	0.0197529	-0.0534579	-0.783135	0.0553427	0.692574	0.146304	0.883337	0.221408	1.67185	0.386735	4.44862	-0.0289799	-0.199545	0.174139	1.16214	0.120821	0.680604	0.294393	2.74539	0.0239557	0.148201
Q9BTE6.EFTTTVVSccPAELQTEGSnGKk	AARSD1	K35k	AARSD1.K35k		4.25	2.25	2.75	1.75	-0.847997	-1.32372	-0.584963	-1.52259	-0.584963	-0.667489							0.0427078	0.179958	-0.0392322	-0.163134	-0.07515	-0.357012	0.0316178	0.221219	0.180284	1.22571	-0.116485	-0.646742	-0.0389619	-0.163598	0.133339	1.42925
Q9NRN7.LVAEkLNIPWNHIR	AASDHPPT	K74k	AASDHPPT.K74k	AASDHPPT	1	0.75	0.25		-0.321928	-0.1066	-1	-0.407821	-1		0.0718615	0.559035	0.147248	1.09896	-0.0753869	-0.461343	-0.12228	-0.683172	-0.244397	-1.96653	-0.301712	-2.82183	0.0471206	0.361283	-0.16514	-1.07215	0.0674808	0.315477	-0.10513	-0.561663	-0.104517	-0.983749
Q9NRN7.NWALkESFIK	AASDHPPT	K180k	AASDHPPT.K180k	AASDHPPT	1	0.25	0.25	0.25	-1.32193	-0.748885				-1.10712	0.142513	2.81438	0.13863	0.989161	0.00388306	0.115231	-0.19095	-1.32101	-0.200747	-1.42907	-0.418433	-5.18095	0.00378015	0.0222034	-0.388543	-4.56318	0.18394	1.26435	-0.157517	-0.998745	-0.257217	-4.45596
Q9NRN7.SFkDEWTQLDMFYR	AASDHPPT	K164k	AASDHPPT.K164k	AASDHPPT	1.25	1.5	0.75	1	0.222392	0.26967	0.321928	0.195439	0.321928		0.0149696	0.0341462	-0.041896	-0.219943	0.0568656	0.28806	0.0613362	0.277118	0.205991	1.48877	0.2823	2.51205	-0.0558175	-0.449704	0.0675759	0.316032	-0.136223	-0.807171	0.0579437	0.261495	0.0915668	0.810447
Q9NRN7.GSIPEFFHIMkR	AASDHPPT	K149k	AASDHPPT.K149k	AASDHPPT	0.5	0.5		0.75			2	0.667218	2	-0.623013	0.117791	0.463857	0.0350859	0.155218	0.0827055	0.573082	0.113566	0.616379	-0.0485043	-0.208919	0.0353354	0.144746	0.0625375	0.523065	-0.0697313	-0.328696	0.261873	2.24281	0.142341	0.860219	-0.14899	-1.70769
NA	AASDHPPT	K263k	NA	AASDHPPT	NA	NA	NA	NA	NA	NA	NA	NA	NA		0.0644308	0.328474	-0.18039	-1.73383	0.244821	1.93694	0.398733	4.71708	0.163789	1.04429	0.622493	12.1953	0.090657	0.880148	0.358341	3.91678	0.00572464	0.0210579	0.317329	3.13644	0.158431	1.88873
Q9NY61.ALLTTNQLPQPDVFPLFkDK	AATF	K264k	AATF.K264k		1	2	0.75	1.5	0.847997	0.872978	0.807355	0.623013	0.807355	-0.196007	0.166527	0.944921	0.00416141	0.0182396	0.162366	0.959014	0.030606	0.123097	0.12601	0.712698	0.143867	0.861934	-0.0368133	-0.265715	0.0219701	0.0862992	0.246724	2.02846	0.122349	0.692721	-0.100982	-0.934849
Q9NY61.LGkGFGAFER	AATF	K383k	AATF.K383k		1.5	2.25	2.75	1	0.514573	0.623013	-1.26303	-1.82962	-1.26303	2.11284							0.265551	2.26156	0.148975	0.907075	0.271393	2.34721	0.0449828	0.34065	0.29042	2.68078	-0.0851467	-0.424278	0.150834	0.936515	0.168742	2.09811
Q9NY61.LQkALLTTNQLPQPDVFPLFK	AATF	K246k	AATF.K246k		1	1	0.5	0.5													-0.157133	-0.98147	-0.0299188	-0.120012	-0.15856	-0.994775	-0.0490877	-0.380648	-0.100119	-0.525745	-0.0907017	-0.460916	-0.151872	-0.946047	-0.00423101	-0.0232748
NA	ABCA1	K2023k	NA		NA	NA	NA	NA	NA	NA	NA	NA	NA		0.0644308	0.328474	-0.18039	-1.73383	0.244821	1.93694	0.398733	4.71708	0.163789	1.04429	0.622493	12.1953	0.090657	0.880148	0.358341	3.91678	0.00572464	0.0210579	0.317329	3.13644	0.158431	1.88873
NA	ABCA1	K2036k	NA		NA	NA	NA	NA	NA	NA	NA	NA	NA		0.0644308	0.328474	-0.18039	-1.73383	0.244821	1.93694	0.398733	4.71708	0.163789	1.04429	0.622493	12.1953	0.090657	0.880148	0.358341	3.91678	0.00572464	0.0210579	0.317329	3.13644	0.158431	1.88873
NA	ABCA1	K2255k	NA		NA	NA	NA	NA	NA	NA	NA	NA	NA		0.0644308	0.328474	-0.18039	-1.73383	0.244821	1.93694	0.398733	4.71708	0.163789	1.04429	0.622493	12.1953	0.090657	0.880148	0.358341	3.91678	0.00572464	0.0210579	0.317329	3.13644	0.158431	1.88873
NA	ABCA13	K3805k	NA		NA	NA	NA	NA	NA	NA	NA	NA	NA		0.0644308	0.328474	-0.18039	-1.73383	0.244821	1.93694	0.398733	4.71708	0.163789	1.04429	0.622493	12.1953	0.090657	0.880148	0.358341	3.91678	0.00572464	0.0210579	0.317329	3.13644	0.158431	1.88873
Q9BZC7.ILTVPESQkGALQGYR	ABCA2	K257k	ABCA2.K257k			0.75	1.75	0.75	2	1.23906	-1	-0.888034	-1	2.58862	0.0703553	0.836768	0.0272855	0.224511	0.0430698	0.66272	-0.240159	-1.91022	0.141735	0.843425	-0.257164	-2.14179	-0.14736	-1.87177	-0.337308	-3.50313	-0.0586563	-0.265416	-0.287026	-2.62631	-0.125198	-1.29479
Q99758.AVAGKEEEDSDPEkALR	ABCA3	K512k	ABCA3.K512k				0.25	0.75		NA	1	0.683964	1	-0.855968	-0.070702	-0.644121	-0.0443478	-0.451335	-0.0263543	-0.286855	0.047001	0.201299	0.0778592	0.373488	0.065638	0.301268	-0.0119071	-0.0737081	0.0369759	0.154069	0.104415	0.556477	0.123297	0.700285	-0.0303005	-0.194419
NA	ABCA3	K1510k	NA		NA	NA	NA	NA	NA	NA	NA	NA	NA		0.16157	0.745088	0.0652517	0.239319	0.0963185	0.217779	0.241499	1.92792	0.0340839	0.138946	0.29579	2.72506	0.0800344	0.73549	0.24194	1.96328	-0.121223	-0.683781	0.0793465	0.387272	0.163169	1.98342
NA	ABCA3	K1520k	NA		NA	NA	NA	NA	NA	NA	NA	NA	NA		0.16157	0.745088	0.0652517	0.239319	0.0963185	0.217779	0.241499	1.92792	0.0340839	0.138946	0.29579	2.72506	0.0800344	0.73549	0.24194	1.96328	-0.121223	-0.683781	0.0793465	0.387272	0.163169	1.98342
NA	ABCA3	K1614k	NA		NA	NA	NA	NA	NA	NA	NA	NA	NA		0.16157	0.745088	0.0652517	0.239319	0.0963185	0.217779	0.241499	1.92792	0.0340839	0.138946	0.29579	2.72506	0.0800344	0.73549	0.24194	1.96328	-0.121223	-0.683781	0.0793465	0.387272	0.163169	1.98342
NA	ABCA3	K1661k	NA		NA	NA	NA	NA	NA	NA	NA	NA	NA		0.16157	0.745088	0.0652517	0.239319	0.0963185	0.217779	0.241499	1.92792	0.0340839	0.138946	0.29579	2.72506	0.0800344	0.73549	0.24194	1.96328	-0.121223	-0.683781	0.0793465	0.387272	0.163169	1.98342
NA	ABCA3	K1668k	NA		NA	NA	NA	NA	NA	NA	NA	NA	NA		0.16157	0.745088	0.0652517	0.239319	0.0963185	0.217779	0.241499	1.92792	0.0340839	0.138946	0.29579	2.72506	0.0800344	0.73549	0.24194	1.96328	-0.121223	-0.683781	0.0793465	0.387272	0.163169	1.98342
Q99758.AVAGkEEEDSDPEK	ABCA3	K503k	ABCA3.K503k		0.5	0.25	0.75	0.5	-0.584963	-0.26967	-0.415037	-0.26967	-0.415037		0.419716	0.354486	-0.317677	-0.256454	0.737393	0.686672
NA	ABCA3	K512k	NA		NA	NA	NA	NA	NA	NA	NA	NA	NA		0.0644308	0.328474	-0.18039	-1.73383	0.244821	1.93694	0.398733	4.71708	0.163789	1.04429	0.622493	12.1953	0.090657	0.880148	0.358341	3.91678	0.00572464	0.0210579	0.317329	3.13644	0.158431	1.88873
NA	ABCA3	K531k	NA		NA	NA	NA	NA	NA	NA	NA	NA	NA		0.0644308	0.328474	-0.18039	-1.73383	0.244821	1.93694	0.398733	4.71708	0.163789	1.04429	0.622493	12.1953	0.090657	0.880148	0.358341	3.91678	0.00572464	0.0210579	0.317329	3.13644	0.158431	1.88873
NA	ABCA3	Q639qK640k	NA		NA	NA	NA	NA	NA	NA	NA	NA	NA		0.0644308	0.328474	-0.18039	-1.73383	0.244821	1.93694	0.398733	4.71708	0.163789	1.04429	0.622493	12.1953	0.090657	0.880148	0.358341	3.91678	0.00572464	0.0210579	0.317329	3.13644	0.158431	1.88873
NA	ABCA3	K646k	NA		NA	NA	NA	NA	NA	NA	NA	NA	NA
NA	ABCA3	K812k	NA		NA	NA	NA	NA	NA	NA	NA	NA	NA
NA	ABCA3	K841k	NA		NA	NA	NA	NA	NA	NA	NA	NA	NA
NA	ABCA3	K1384k	NA		NA	NA	NA	NA	NA	NA	NA	NA	NA
NA	ABCA3	K1408k	NA		NA	NA	NA	NA	NA	NA	NA	NA	NA
NA	ABCA3	K1422k	NA		NA	NA	NA	NA	NA	NA	NA	NA	NA								0.284482	1.8032	-0.0574289	-0.152331	0.489834	3.97906	0.12892	1.05145
NA	ABCA3	K1427k	NA		NA	NA	NA	NA	NA	NA	NA	NA	NA								0.284482	1.8032	-0.0574289	-0.152331	0.489834	3.97906	0.12892	1.05145
NA	ABCA8	K1406k	NA		NA	NA	NA	NA	NA	NA	NA	NA	NA		-0.520573	-0.290655	0.00135768	0.000470818	-0.521931	-0.271127	0.290799	2.64506	0.0402636	0.168084	0.378439	4.26899	0.0966732	0.967531	0.239906	1.93593	0.041739	0.177145	0.153625	0.962265	0.0890367	0.778452
NA	ABCA8	K1612k	NA		NA	NA	NA	NA	NA	NA	NA	NA	NA		-0.520573	-0.290655	0.00135768	0.000470818	-0.521931	-0.271127	0.290799	2.64506	0.0402636	0.168084	0.378439	4.26899	0.0966732	0.967531	0.239906	1.93593	0.041739	0.177145	0.153625	0.962265	0.0890367	0.778452
NA	ABCA8	K811k	NA		NA	NA	NA	NA	NA	NA	NA	NA	NA								-0.293991	-0.890612	0.323929	0.855369	-0.0769019	-0.174261	-0.232838	-1.21738	0.841506	0.410059	0.825012	0.214538	0.299376	0.148395
NA	ABCA8	K830k	NA		NA	NA	NA	NA	NA	NA	NA	NA	NA								-0.293991	-0.890612	0.323929	0.855369	-0.0769019	-0.174261	-0.232838	-1.21738	0.841506	0.410059	0.825012	0.214538	0.299376	0.148395
P08183.LANDAAQVkGAIGSR	ABCB1	K826k	ABCB1.K826k		0.5	0.75	0.5	0.5	0.415037	0.26967				-0.26967	0.15172	1.09277	0.132755	0.696527	0.0189643	0.10742	0.400406	4.75535	-0.181339	-1.2193	0.322869	3.18424	0.224476	3.91432	-0.0996845	-0.522681	0.0823597	0.406338	0.104973	0.56052	-0.0817926	-0.690137
NA	ABCB6	K726k	NA		NA	NA	NA	NA	NA	NA	NA	NA	NA		0.11777	0.304334	0.149012	0.508631	-0.0312418	-0.0759257	0.343759	3.5687	-0.0413909	-0.173536	0.402203	4.79668	0.148616	1.89823	0.120351	0.6769	0.192352	1.35563	0.292856	2.72028	-0.03235	-0.210002
Q9NP58.GGVYADMWQLQQGQEETSEDTkPQTMER	ABCB6	K836k	ABCB6.K836k		0.25	0.75	2.5	1.25	1	0.396592	-0.874469	-1.11702	-0.874469	1.38201							-0.246618	-1.99642	-0.378289	-4.26579	-0.472132	-6.60384	0.0508074	0.397881	0.0316041	0.128958	-0.0928307	-0.475272	-0.0653492	-0.303127	0.0559086	0.413055
Q9NP58.EAIIkYQGLEWK	ABCB6	K482k	ABCB6.K482k		1.25	0.75	2	1.5	-0.584963	-0.683964	-0.36257	-0.443709	-0.36257								-0.0477633	-0.205153	-0.256399	-2.13104	-0.194201	-1.35638	0.0805053	0.741647	-0.183593	-1.26065	-0.112625	-0.617236	-0.152871	-0.955275	-0.0318858	-0.206445
Q9NP58.AIQASLAkVcANR	ABCB6	K771k	ABCB6.K771k		2.25	2	3	2.5	-0.152003	-0.151697	-0.241008	-0.740669	-0.241008	-0.196007							0.13736	0.424766	-0.172312	-0.569711	-0.0823451	-0.243636	0.129194	0.70515	0.189971	1.29735	0.0526922	0.229975	0.0120362	0.04477	0.0616168	0.458624
NA	ABCB6	K464k	NA		NA	NA	NA	NA	NA	NA	NA	NA	NA								-0.144507	-0.867536	-0.0903016	-0.452631	-0.225186	-1.71848	-0.0209162	-0.137047	-0.0554399	-0.247862	-0.00964625	-0.0360562	-0.0486644	-0.212077	-0.0205751	-0.124805
Q9NUT2.QDITFFDANkTGQLVSR	ABCB8	K247k	ABCB8.K247k		3	2.75	3	2.75	-0.115477	-0.204865	-0.115477	-0.14814	-0.115477		-0.170277	-0.494548	0.023746	0.0519414	-0.194023	-0.57566	0.247634	2.01018	0.0105331	0.0391286	0.297478	2.75243	0.0914892	0.891998	0.11623	0.644774	0.141441	0.852316	0.118564	0.662881	-0.0113273	-0.0650461
Q9NUT2.IVALVGQSGGGkTTVASLLER	ABCB8	K513k	ABCB8.K513k		0.25	0.25		0.5			1.58496	0.740669	1.58496	-0.621125	0.0603372	0.120466	-0.0121895	-0.0479927	0.0725267	0.200049	0.193865	1.3527	0.0266698	0.10563	0.312086	2.99623	0.0645148	0.545504	-0.10609	-0.568654	0.103395	0.549114	0.0327584	0.134273	-0.0941218	-0.84337
Q9NUT2.LTTDVQEFkSSFK	ABCB8	K263k	ABCB8.K263k		2.25	1	1.75	2	-1	-0.93412	0.169925	0.195439	0.169925	-1.09415	0.216956	1.44919	0.156544	1.03341	0.0604117	0.546388	0.0850922	0.418795	0.350142	3.69164	0.337948	3.45902	-0.102274	-1.0525	-0.0796866	-0.389407	0.309587	3.00093	0.183361	1.25819	-0.174901	-2.22911
P33527.VDENQkAYYPSIVANR	ABCC1	K1187k	ABCC1.K1187k		3	2.25	3	2.5	-0.378512	-0.748885	-0.241008	-0.443709	-0.241008	-0.26967	-0.0582886	-0.803436	0.00870457	0.0583843	-0.0669931	-0.764518	0.0981847	0.505781	-0.196369	-1.38023	-0.120107	-0.666234	0.113658	1.23628	0.0547847	0.244331	-0.160257	-1.02484	0.0882991	0.444925	0.0966184	0.876139
P33527.LMNEILNGIkVLK	ABCC1	K513k	ABCC1.K513k		1.25		0.25		-2.58496	-1.81269	-1	-0.407821	-1		0.0718615	0.559035	0.147248	1.09896	-0.0753869	-0.461343	-0.12228	-0.683172	-0.244397	-1.96653	-0.301712	-2.82183	0.0471206	0.361283	-0.16514	-1.07215	0.0674808	0.315477	-0.10513	-0.561663	-0.104517	-0.983749
P33527.VIVLDkGEIQEYGAPSDLLQQR	ABCC1	K1502k	ABCC1.K1502k		1.25	1.5	2	0.25	0.222392	0.26967	-2.16993	-1.82962	-2.16993	2.68455	-0.209657	-2.65046	-0.174969	-1.5402	-0.0346875	-0.410261	0.121607	0.677904	0.050604	0.21969	0.220466	1.66034	0.0273976	0.186839	-0.169109	-1.11139	0.0328168	0.134543	-0.267131	-2.3201	-0.0907256	-0.799743
P33527.HHNSTAELQkAEAK	ABCC1	K936k	ABCC1.K936k		0.25		1.5	0.25	-1	-0.407821	-1.80735	-0.831308	-1.80735	-1.55271	0.0808281	0.420789	0.114323	0.640501	-0.0334948	-0.152343	0.0999034	0.517683	-0.00328866	-0.0118634	0.126435	0.716093	0.0398183	0.292564	0.208063	1.53507	-0.253241	-2.11917	0.104232	0.555151	0.207264	2.99445
NA	ABCC1	K259k	NA		NA	NA	NA	NA	NA	NA	NA	NA	NA		-0.0329275	-0.116099	-0.00649094	-0.0293946	-0.0264365	-0.147895	-0.282106	-2.50906	-0.00481386	-0.0174735	-0.264994	-2.2535	-0.106998	-1.12694	-0.071311	-0.338084	0.073392	0.350593	-0.141011	-0.848547	-0.0650151	-0.503854
NA	ABCC1	K274k	NA		NA	NA	NA	NA	NA	NA	NA	NA	NA		-0.0329275	-0.116099	-0.00649094	-0.0293946	-0.0264365	-0.147895	-0.282106	-2.50906	-0.00481386	-0.0174735	-0.264994	-2.2535	-0.106998	-1.12694	-0.071311	-0.338084	0.073392	0.350593	-0.141011	-0.848547	-0.0650151	-0.503854
NA	ABCC1	K280k	NA		NA	NA	NA	NA	NA	NA	NA	NA	NA		-0.0329275	-0.116099	-0.00649094	-0.0293946	-0.0264365	-0.147895	-0.282106	-2.50906	-0.00481386	-0.0174735	-0.264994	-2.2535	-0.106998	-1.12694	-0.071311	-0.338084	0.073392	0.350593	-0.141011	-0.848547	-0.0650151	-0.503854
P33527.RPVkDGGGTNSITVR	ABCC1	K636k	ABCC1.K636k		5.5	4.75	7.5	5.5	-0.201634	-0.314346	-0.430634	-0.981667	-0.430634	0.916957	-0.0305512	-0.194621	-0.00839022	-0.0307529	-0.022161	-0.099474	0.385154	4.41401	0.188113	1.29055	0.550195	9.1603	0.0760315	0.6841	0.220188	1.68173	0.0953935	0.492786	0.276756	2.46549	0.0560703	0.414605
NA	ABCC1	K814k	NA		NA	NA	NA	NA	NA	NA	NA	NA	NA		-0.106762	-0.902417	-0.0870791	-0.295086	-0.0196827	-0.0291321	0.350226	3.69327	0.110641	0.594636	0.517698	8.01746	0.0924475	0.905737	0.208841	1.54426	0.0713327	0.338214	0.342933	3.61094	0.0617825	0.470809
P33527.TYASTEQEQDAEEnGVTGVSGPGkEAK	ABCC1	K891k	ABCC1.K891k		4.75	5.75	5.5	5.25	0.263034	0.888034	-0.0641303	-0.171537	-0.0641303	1.13061	0.0262359	0.172851	0.0284021	0.161724	-0.00216614	-0.00855481	0.0939616	0.477014	0.181108	1.21691	0.223308	1.6952	-0.0336269	-0.238138	-0.135778	-0.803375	-0.051165	-0.225097	-0.147085	-0.902447	-0.0380165	-0.254781
P33527.VDANEEVEALIVkSPQK	ABCC1	K303k	ABCC1.K303k		2.25	2.25	2.75	2.5			-0.125531	-0.26967	-0.125531	-0.171537	0.0558294	0.117443	0.0522234	0.131273	0.00360596	0.00789746	0.0688227	0.31957	-0.21478	-1.59173	-0.0136489	-0.0513415	0.109433	1.16631	0.104356	0.556046	-0.0764627	-0.369344	0.00888671	0.0331145	0.0812419	0.683621
P33527.QMEnGMLVTDSAGkQLQR	ABCC1	K908k	ABCC1.K908k		2.5	2	3	0.75	-0.289507	-0.173265	-1.70044	-1.35738	-1.70044	1.03244	-0.0571682	-1.21411	-0.104244	-0.767488	0.047076	0.192492	-0.248618	-2.02355	-0.0339999	-0.138559	-0.203316	-1.45815	-0.0828139	-0.772171	0.141649	0.854141	0.195627	1.39206	0.143235	0.868098	-0.0242522	-0.150294
P33527.GYIQMTPLNKTk	ABCC1	K74k	ABCC1.K74k		1.5	1	3	2	-0.485427	-0.740669	-0.530515	-1.03753	-0.530515	-0.511353	0.0280945	0.174269	-0.0110212	-0.0576707	0.0391158	0.226084	0.203723	1.46279	0.251335	2.06073	0.390735	4.53697	-0.018372	-0.118478	0.199628	1.43726	-0.0489629	-0.213619	0.0475069	0.206124	0.111692	1.0868
P33527.FIHQSDLkVDENQK	ABCC1	K1181k	ABCC1.K1181k		0.5	0.25	0.5	1.5	-0.584963	-0.26967	1.22239	0.834908	1.22239	-1.0823	0.1043	0.856557	0.0645282	0.32699	0.0397722	0.244256	-0.106931	-0.56754	0.0652874	0.299275	0.025813	0.101894	-0.0664533	-0.567885	0.100901	0.531284	-0.00792541	-0.0294169	0.0830809	0.410952	0.0488956	0.347899
P33527.TGAGkSSLTLGLFR	ABCC1	K1333k	ABCC1.K1333k		2.25	2	1.5	1.75	-0.152003	-0.407821	0.192645	0.26967	0.192645	-0.855968	0.144714	0.817583	0.0441181	0.167636	0.100596	0.426897	-0.114211	-0.621221	0.0702932	0.328143	-0.0659541	-0.303069	-0.071194	-0.624226	0.0034323	0.0125073	0.0745412	0.357569	-0.0124245	-0.0469678	-0.0319492	-0.20693
P33527.TYQVAHMkSK	ABCC1	K496k	ABCC1.K496k		1	0.5	3	1.25	-0.736966	-0.443709	-1.11548	-1.82962	-1.11548	-1.75778	0.0703553	0.836768	0.0272855	0.224511	0.0430698	0.66272	-0.240159	-1.91022	0.141735	0.843425	-0.257164	-2.14179	-0.14736	-1.87177	-0.337308	-3.50313	-0.0586563	-0.265416	-0.287026	-2.62631	-0.125198	-1.29479
P33527.ESSkVDANEEVEALIVK	ABCC1	K290k	ABCC1.K290k		1.25	0.5	1.75	0.75	-1	-1.00815	-1	-0.888034	-1	-0.171537	0.090176	0.277226	-0.131887	-0.591456	0.222063	0.805966	-0.0725511	-0.341458	0.108856	0.581531	0.0901888	0.451888	-0.0699989	-0.609806	-0.0179843	-0.0695259	-0.0230767	-0.091046	-0.216115	-1.63165	0.00228802	0.0124376
NA	ABCC1	K1526k	NA		NA	NA	NA	NA	NA	NA	NA	NA	NA		0.469754	1.79549	-0.00743256	-0.0213065	0.477187	1.68419	-0.068304	-0.316564	0.0981572	0.505591	0.064373	0.294099	-0.0642317	-0.542268	-0.147395	-0.905239	-0.0136613	-0.0519021	-0.218952	-1.66645	-0.0600864	-0.453831
P33527.EAkqMENGMLVTDSAGK	ABCC1	K894k	ABCC1.K894k		1	0.25	0.5	0.25	-1.32193	-0.526047	-0.584963	-0.26967	-0.584963	-0.683964							0.0427078	0.179958	-0.0392322	-0.163134	-0.07515	-0.357012	0.0316178	0.221219	0.180284	1.22571	-0.116485	-0.646742	-0.0389619	-0.163598	0.133339	1.42925
P33527.kSSTVGEIVNLMSVDAQR	ABCC1	K416k	ABCC1.K416k		1.5	1.5	0.25	0.5			0.584963	0.26967	0.584963	-0.130245							-0.367889	-4.04745	-0.0932013	-0.471907	-0.425574	-5.35646	-0.105993	-1.1109	-0.197671	-1.41506	-0.216179	-1.63244	-0.13444	-0.792012	0.00831578	0.0468945
P33527.LYAWELAFKDk	ABCC1	K527k	ABCC1.K527k		1	0.25	0.25	1	-1.32193	-0.748885	1.32193	0.748885	1.32193	-1.58416							0.0311863	0.125714	-0.170982	-1.11436	-0.149598	-0.912654	0.0780098	0.709287	0.085196	0.424598	-0.0986473	-0.515388	-0.0556476	-0.248985	0.0826009	0.699752
P33527.LMEADkAQTGQVK	ABCC1	K952k	ABCC1.K952k		0.25	0.5	0.25	0.25	0.584963	0.170176				-0.170176							-0.139383	-0.823215	-0.213398	-1.5753	-0.390759	-4.53749	0.0285599	0.196151	-0.226175	-1.75683	0.238998	1.92378	-0.117775	-0.656734	-0.209002	-3.03937
P33527.TEIGEkGVNLSGGQK	ABCC1	K764k	ABCC1.K764k		2.25	2.5	2.5	2.5	0.137504	0.26967				-0.249673							-0.082207	-0.392678	0.0987142	0.493916	0.0408255	0.16166	-0.0674368	-0.577631	0.246896	1.80681	0.0336669	0.131219	0.274594	2.1987	0.0926609	0.757787
P33527.LkEYSETEK	ABCC1	K1265k	ABCC1.K1265k			0.5	0.75	0.75	1.58496	0.740669				-0.621125							0.0269804	0.0415445	-0.280201	-0.668448	-0.52203	-1.72562	0.114188	0.383637	0.26619	0.728908	-0.357017	-0.815784	0.0500136	0.0705499	0.245333	1.11491
Q5T3U5.TkEGLEEEQSTSGR	ABCC10	K844k	ABCC10.K844k		0.75	0.5	0.5	0.25	-0.415037	-0.26967	-0.584963	-0.26967	-0.584963		-0.132679	-1.16002	-0.16431	-1.27596	0.0316313	0.352111	-0.0279935	-0.111449	0.210901	1.54583	0.116377	0.637595	-0.0921812	-0.901908	0.00100158	0.00361338	-0.0270388	-0.108366	0.0413721	0.17534	0.0125986	0.0728987
NA	ABCC10	K460k	NA		NA	NA	NA	NA	NA	NA	NA	NA	NA		0.469754	1.79549	-0.00743256	-0.0213065	0.477187	1.68419	-0.068304	-0.316564	0.0981572	0.505591	0.064373	0.294099	-0.0642317	-0.542268	-0.147395	-0.905239	-0.0136613	-0.0519021	-0.218952	-1.66645	-0.0600864	-0.453831
NA	ABCC10	K473k	NA		NA	NA	NA	NA	NA	NA	NA	NA	NA		0.469754	1.79549	-0.00743256	-0.0213065	0.477187	1.68419	-0.068304	-0.316564	0.0981572	0.505591	0.064373	0.294099	-0.0642317	-0.542268	-0.147395	-0.905239	-0.0136613	-0.0519021	-0.218952	-1.66645	-0.0600864	-0.453831
NA	ABCC10	K863k	NA		NA	NA	NA	NA	NA	NA	NA	NA	NA		0.469754	1.79549	-0.00743256	-0.0213065	0.477187	1.68419	-0.068304	-0.316564	0.0981572	0.505591	0.064373	0.294099	-0.0642317	-0.542268	-0.147395	-0.905239	-0.0136613	-0.0519021	-0.218952	-1.66645	-0.0600864	-0.453831
Q5T3U5.DNILFGkTFDAQLYK	ABCC10	K688k	ABCC10.K688k		1	0.5	0.5	0.5	-0.736966	-0.443709				-0.574189	0.094071	1.17871	-0.138152	-1.47588	0.232223	2.27203	0.203388	1.45898	0.09763	0.501963	0.264479	2.24605	0.0408085	0.301593	0.374737	4.25977	0.0608967	0.277861	0.483809	7.06636	0.141008	1.56238
Q92887.NVNSLKEDEELVkGQK	ABCC2	K947k	ABCC2.K947k		2.75	2.5	5	5	-0.125531	-0.171537				-0.196007	-0.0912043	-1.10976	0.113536	0.951907	-0.204741	-1.93198	-0.216065	-1.6071	-0.0912696	-0.459031	-0.316909	-3.07947	-0.0481542	-0.371413	-0.0903498	-0.45856	-0.105907	-0.567314	0.0268663	0.107602	0.00698968	0.0391012
Q92887.NVNSLkEDEELVK	ABCC2	K940k	ABCC2.K940k		2.5	2.5	3	2.75			-0.115477	-0.195439	-0.115477	-0.171537	-0.194705	-0.520095	0.0644668	0.209987	-0.259172	-0.883305
Q92887.GITcDIGSmEkIGVVGR	ABCC2	K1329k	ABCC2.K1329k		1	0.5	0.25	1.25	-0.736966	-0.443709	1.58496	1.52259	1.58496	-2.09432	-0.129555	-0.922016	-0.05663	-0.262403	-0.0729246	-0.506103	-0.0112113	-0.0417615	0.0591466	0.265077	0.0813362	0.395027	-0.0271487	-0.18486	0.00055138	0.00198551	-0.0197661	-0.0769617	-0.00809803	-0.0300788	0.00912865	0.0517317
Q92887.TGAGkSSLTNcLFR	ABCC2	K1340k	ABCC2.K1340k		0.75		1.5	0.25	-2	-1.23906	-1.80735	-0.831308	-1.80735	-0.855968	0.0808281	0.420789	0.114323	0.640501	-0.0334948	-0.152343	0.0999034	0.517683	-0.00328866	-0.0118634	0.126435	0.716093	0.0398183	0.292564	0.208063	1.53507	-0.253241	-2.11917	0.104232	0.555151	0.207264	2.99445
Q92887.LEkYLGGDDLDTSAIR	ABCC2	K615k	ABCC2.K615k		0.5		0.5	0.5	-1.58496	-0.740669				-0.740669	-0.0172943	-0.0285741	0.030623	0.0729832	-0.0479173	-0.0772974	0.0119369	0.0445944	-0.238847	-1.89297	-0.215794	-1.60385	0.096769	0.968955	-0.0484744	-0.211097	-0.152503	-0.951872	0.00654059	0.0241398	0.0467401	0.328689
Q92887.DNILFGTEFNEkR	ABCC2	K728k	ABCC2.K728k		4.25	2.5	5.25	4	-0.710493	-2.40257	-0.371969	-1.32006	-0.371969	-0.443709	0.150852	0.627479	0.0326143	0.1183	0.118237	0.327687	0.114768	0.625408	-0.0514081	-0.223855	-0.0517015	-0.225381	0.0641216	0.54101	-0.0787317	-0.383424	0.0908543	0.46194	0.0840154	0.416961	-0.0761951	-0.62519
Q92887.NQSQSQDALVLEDVEKk	ABCC2	K295k	ABCC2.K295k		0.25		0.5	0.5	-1	-0.407821				-0.18612	0.105504	0.881165	0.0716639	0.920314	0.0338401	0.679051	0.240481	1.91446	0.0736353	0.347917	0.422849	5.28902	0.06438	0.543962	0.235202	1.87348	0.179587	1.21842	0.291051	2.69099	0.0249876	0.155511
Q92887.ITEYTkVENEAPWVTDK	ABCC2	K1277k	ABCC2.K1277k		1.5	2	2.5	2.5	0.36257	0.443709				-0.443709							0.231648	1.79985	0.102565	0.536339	0.318278	3.10335	0.0498086	0.387838	0.0200252	0.0780514	0.146676	0.898769	0.134374	0.791456	-0.0569042	-0.422638
O15438.RHLGPSEkVQVTEAK	ABCC3	K931k	ABCC3.K931k		0.5	0.25	0.25		-0.584963	-0.26967	-1	-0.407821	-1		0.0718615	0.559035	0.147248	1.09896	-0.0753869	-0.461343	-0.12228	-0.683172	-0.244397	-1.96653	-0.301712	-2.82183	0.0471206	0.361283	-0.16514	-1.07215	0.0674808	0.315477	-0.10513	-0.561663	-0.104517	-0.983749
O15438.ILEAAkGEIR	ABCC3	K1344k	ABCC3.K1344k		3	2.5	4.75	3	-0.241008	-0.320564	-0.621488	-1.82962	-0.621488	1.29307	-0.160326	-0.562133	-0.0763809	-0.295577	-0.0839455	-0.362907	0.11728	0.644472	0.0106748	0.0396773	0.0839784	0.411693	0.0411352	0.304591	-0.0398243	-0.167777	0.0794462	0.387897	-0.0409506	-0.173272	-0.0535883	-0.391044
O15438.LYAWEPSFLkQVEGIR	ABCC3	K512k	ABCC3.K512k		5.75	5.25	5.5	4	-0.125531	-0.258053	-0.436099	-1.21575	-0.436099	0.78439	-0.0305512	-0.194621	-0.00839022	-0.0307529	-0.022161	-0.099474	0.385154	4.41401	0.188113	1.29055	0.550195	9.1603	0.0760315	0.6841	0.220188	1.68173	0.0953935	0.492786	0.276756	2.46549	0.0560703	0.414605
O15438.TGAGkSSMTLcLFR	ABCC3	K1329k	ABCC3.K1329k		2.25	1	1.75	1.75	-1	-1.32006				-1.0208	-0.119341	-0.886922	-0.126495	-1.05344	0.00715364	0.0778551	-0.142434	-0.849469	-0.14788	-0.897308	-0.314033	-3.02966	0.00210164	0.0122095	-0.237143	-1.89911	-0.106144	-0.56905	-0.169396	-1.11425	-0.0588578	-0.441686
O15438.DFEIISDTkVDANQR	ABCC3	K1177k	ABCC3.K1177k		0.75	0.5	0.25	0.25	-0.415037	-0.26967				-0.26967	0.15172	1.09277	0.132755	0.696527	0.0189643	0.10742	0.400406	4.75535	-0.181339	-1.2193	0.322869	3.18424	0.224476	3.91432	-0.0996845	-0.522681	0.0823597	0.406338	0.104973	0.56052	-0.0817926	-0.690137
O15438.ASAAPGkNASGEDEVLLGARPR	ABCC3	K278k	ABCC3.K278k		1	1.5	2	1.25	0.485427	0.320564	-0.584963	-0.748885	-0.584963	1.75778	0.0595259	0.522797	0.026008	0.148571	0.0335179	0.280399	0.00344882	0.0124493	0.0315742	0.12747	0.0840063	0.41187	-0.0108526	-0.066729	-0.0416631	-0.176771	0.0722998	0.344008	0.00294137	0.0106968	-0.0512036	-0.368891
O15438.HLGPSEkVQVTEAK	ABCC3	K931k	ABCC3.K931k		1.75	0.75	2	1.75	-1	-1.52259	-0.169925	-0.407821	-0.169925	-1.10712	-0.131173	-1.10538	-0.192594	-1.11871	0.0614208	0.367551	0.0958334	0.48968	0.116955	0.641998	0.269097	2.31332	-0.00815026	-0.0492498	0.195495	1.39058	-0.0720317	-0.342399	-0.0104981	-0.0393765	0.1202	1.21565
O15438.ALVITNSVkR	ABCC3	K401k	ABCC3.K401k		1.25	0.25	1.5	0.5	-1.58496	-1.52259	-1.22239	-1.30255	-1.22239		0.0703553	0.836768	0.0272855	0.224511	0.0430698	0.66272	-0.240159	-1.91022	0.141735	0.843425	-0.257164	-2.14179	-0.14736	-1.87177	-0.337308	-3.50313	-0.0586563	-0.265416	-0.287026	-2.62631	-0.125198	-1.29479
O15438.VQVTEAkADGALTQEEK	ABCC3	K938k	ABCC3.K938k		2.25	3.25	5	4.25	0.485427	1.52259	-0.222392	-0.553925	-0.222392	1.57661	-0.0378321	-0.49585	-0.0950723	-1.33372	0.0572403	0.682346	0.00198405	0.0071192	0.254664	2.1068	0.0829421	0.405125	-0.0975005	-0.97986	0.0710483	0.336517	-0.0451003	-0.193894	-0.0596996	-0.271189	0.0521856	0.377956
O15438.LMSEILnGIKVLk	ABCC3	K502k	ABCC3.K502k		1.75	0.75	0.75	0.5	-1	-1.52259	-0.415037	-0.136451	-0.415037	-0.611516							-0.155061	-0.9623	-0.0747757	-0.354757	-0.322474	-3.17725	-0.0309792	-0.215915	0.19722	1.40996	-0.0318545	-0.130107	0.0417538	0.177218	0.102923	0.961552
O15438.ASAAPGkNASGEDEVLLGAR	ABCC3	K278k	ABCC3.K278k		7.25	8	8.25	7.5	0.137504	0.207236	-0.133267	-0.167779	-0.133267	0.382106							-0.163097	-1.03767	-0.0101944	-0.0378186	-0.208209	-1.5144	-0.0589999	-0.483891	0.0634833	0.292452	-0.00308717	-0.0112337	0.176083	1.18207	0.0299101	0.191487
O15438.DLWSLkEEDR	ABCC3	K244k	ABCC3.K244k		0.5	0.5		0.25			1	0.407821	1	-0.26967							0.0376293	0.155509	-0.0440871	-0.186747	-0.019351	-0.0744635	0.0315316	0.2205	-0.153088	-0.957283	0.139774	0.837768	-0.053287	-0.236317	-0.131583	-1.39967
O15439.SEGkVGFQAYK	ABCC4	K695k	ABCC4.K695k		1	0.5	1.5	1.25	-0.736966	-0.443709	-0.222392	-0.115138	-0.222392	-0.171537	-0.1318	-2.308	-0.115457	-1.29598	-0.0163436	-1.05607	-0.0363845	-0.149647	0.28258	2.51637	0.186963	1.27831	-0.123078	-1.39983	-0.0136701	-0.0519375	0.185721	1.2834	0.164469	1.06558	-0.0895866	-0.785355
O15439.MVQQLGkAEAAALTETAK	ABCC4	K1278k	ABCC4.K1278k		2.25	2.5	2.75	2	0.137504	0.26967	-0.415037	-1.23906	-0.415037	1.39234	0.275484	0.753049	0.0810051	0.338736	0.194479	1.22111	0.0182074	0.0697459	-0.0659079	-0.302805	-0.0624696	-0.283418	0.0324573	0.228244	-0.154499	-0.970402	-0.0247336	-0.0982272	-0.0220324	-0.0865656	-0.0583037	-0.436251
O15439.PSLkDGALESQDTENVPVTLSEENR	ABCC4	K670k	ABCC4.K670k		0.25		0.5	1.75	-1	-0.407821	1.41504	0.654127	1.41504	-0.855968	-0.215108	-3.20461	-0.393974	-2.18852	0.178866	1.52206	-0.0733244	-0.34606	0.110191	0.591316	-0.136071	-0.795157	-0.0708122	-0.619603	-0.305633	-2.93312	-0.14235	-0.860293	-0.301308	-2.86001	-0.0733635	-0.593411
NA	ABCC4	K407k	NA		NA	NA	NA	NA	NA	NA	NA	NA	NA		0.469754	1.79549	-0.00743256	-0.0213065	0.477187	1.68419	-0.068304	-0.316564	0.0981572	0.505591	0.064373	0.294099	-0.0642317	-0.542268	-0.147395	-0.905239	-0.0136613	-0.0519021	-0.218952	-1.66645	-0.0600864	-0.453831
NA	ABCC4	K515k	NA		NA	NA	NA	NA	NA	NA	NA	NA	NA		0.469754	1.79549	-0.00743256	-0.0213065	0.477187	1.68419	-0.068304	-0.316564	0.0981572	0.505591	0.064373	0.294099	-0.0642317	-0.542268	-0.147395	-0.905239	-0.0136613	-0.0519021	-0.218952	-1.66645	-0.0600864	-0.453831
NA	ABCC4	K622k	NA		NA	NA	NA	NA	NA	NA	NA	NA	NA		0.469754	1.79549	-0.00743256	-0.0213065	0.477187	1.68419	-0.068304	-0.316564	0.0981572	0.505591	0.064373	0.294099	-0.0642317	-0.542268	-0.147395	-0.905239	-0.0136613	-0.0519021	-0.218952	-1.66645	-0.0600864	-0.453831
NA	ABCC4	K1217k	NA		NA	NA	NA	NA	NA	NA	NA	NA	NA		0.469754	1.79549	-0.00743256	-0.0213065	0.477187	1.68419	-0.068304	-0.316564	0.0981572	0.505591	0.064373	0.294099	-0.0642317	-0.542268	-0.147395	-0.905239	-0.0136613	-0.0519021	-0.218952	-1.66645	-0.0600864	-0.453831
O15439.AENDAQkPSLTR	ABCC4	K77k	ABCC4.K77k		0.25	0.25	0.25	0.25													0.149478	0.911581	0.028555	0.113934	0.140447	0.832327	0.0466601	0.356802	-0.0642932	-0.29707	-0.0513404	-0.226018	-0.111032	-0.605238	-0.00581973	-0.0323259
NA	ABCC5	K1218k	NA		NA	NA	NA	NA	NA	NA	NA	NA	NA		-0.0368284	-0.362377	-0.15366	-1.20036	0.116832	0.916181	-0.0633271	-0.288214	0.20098	1.43171	0.172584	1.13029	-0.101987	-1.04807	0.164419	1.06509	0.0196742	0.0765759	0.222086	1.70534	0.065034	0.504049
NA	ABCC5	K383k	NA		NA	NA	NA	NA	NA	NA	NA	NA	NA		0.469754	1.79549	-0.00743256	-0.0213065	0.477187	1.68419	-0.068304	-0.316564	0.0981572	0.505591	0.064373	0.294099	-0.0642317	-0.542268	-0.147395	-0.905239	-0.0136613	-0.0519021	-0.218952	-1.66645	-0.0600864	-0.453831
NA	ABCC5	K824k	NA		NA	NA	NA	NA	NA	NA	NA	NA	NA		0.469754	1.79549	-0.00743256	-0.0213065	0.477187	1.68419	-0.068304	-0.316564	0.0981572	0.505591	0.064373	0.294099	-0.0642317	-0.542268	-0.147395	-0.905239	-0.0136613	-0.0519021	-0.218952	-1.66645	-0.0600864	-0.453831
O15440.SkLSIIPQEPVLFSGTVR	ABCC5	K1269k	ABCC5.K1269k		0.5	0.75		0.5	0.415037	0.136451	1.58496	0.740669	1.58496	-0.171537							-0.305004	-2.87648	-0.332259	-3.35371	-0.568704	-9.8679	0.0105169	0.0645258	-0.24335	-1.98236	-0.0612822	-0.28002	-0.298867	-2.81922	-0.0818033	-0.690264
P33897.AFSPkFGELVAEEAR	ABCD1	K264k	ABCD1.K264k		0.75	0.5	0.25	0.5	-0.415037	-0.170176	0.584963	0.26967	0.584963	-0.368929	0.0282584	0.246409	0.0560939	0.54614	-0.0278355	-0.197228	-0.185836	-1.26636	-0.115127	-0.628121	-0.338285	-3.46532	-0.0272841	-0.185936	-0.206052	-1.51144	-0.0425148	-0.180977	-0.154598	-0.971325	-0.0734773	-0.594674
NA	ABCD1	K610k	NA		NA	NA	NA	NA	NA	NA	NA	NA	NA		-0.0368284	-0.362377	-0.15366	-1.20036	0.116832	0.916181	-0.0633271	-0.288214	0.20098	1.43171	0.172584	1.13029	-0.101987	-1.04807	0.164419	1.06509	0.0196742	0.0765759	0.222086	1.70534	0.065034	0.504049
P28288.LITNSEEIAFYnGNkR	ABCD3	K286k	ABCD3.K286k		1.25	1		0.5	-0.263034	-0.14814	1.58496	0.740669	1.58496	-0.516764	0.0959082	0.289736	0.300706	1.0493	-0.204797	-0.805065	0.0133604	0.050198	0.0484233	0.208506	0.12528	0.706873	-0.0135296	-0.0846222	-0.106197	-0.569437	0.117361	0.65352	0.008546	0.0318007	-0.100445	-0.927519
NA	ABCD3	K260k	NA		NA	NA	NA	NA	NA	NA	NA	NA	NA		-0.0368284	-0.362377	-0.15366	-1.20036	0.116832	0.916181	-0.0633271	-0.288214	0.20098	1.43171	0.172584	1.13029	-0.101987	-1.04807	0.164419	1.06509	0.0196742	0.0765759	0.222086	1.70534	0.065034	0.504049
P28288.AAFSkYLTAR	ABCD3	K6k	ABCD3.K6k		2.25	2.75	5	4	0.263034	0.311533	-0.304855	-0.44865	-0.304855	0.865526							-0.159378	-1.00245	0.103677	0.544213	-0.201909	-1.44219	-0.101504	-1.04062	-0.140383	-0.674068	-0.272716	-1.9383	-0.278361	-1.84118	0.0577127	0.383237
P28288.SGANVLIcGPnGcGkSSLFR	ABCD3	K479k	ABCD3.K479k		1.75	1.5	1.5	1.5	-0.192645	-0.115329				-0.165091							0.195053	1.36573	-0.17551	-1.15965	0.0316556	0.127839	0.142988	1.78127	-0.12851	-0.742556	0.0180573	0.0698286	-0.0661847	-0.307948	-0.0658527	-0.512564
O14678.ISEGQSLLITGNTGTGkTSLLR	ABCD4	K427k	ABCD4.K427k		0.75	0.25			-1	-0.683964		NA		-0.855968	-0.0794077	-0.470431	-0.160038	-0.934315	0.0806307	0.397487	0.0776486	0.372197	0.239187	1.89742	0.378972	4.28038	-0.0623321	-0.520756	0.190597	1.33631	-0.103629	-0.550801	-0.0279472	-0.112409	0.132196	1.40996
O14678.VSISAPSSDkPLIK	ABCD4	K401k	ABCD4.K401k		0.25	0.5		0.5	0.584963	0.26967	1.58496	0.740669	1.58496	-0.249673	-0.140011	-1.39414	-0.196881	-2.40551	0.0568701	0.439679	0.116345	0.637353	0.186355	1.27186	0.216039	1.60679	-0.0270144	-0.183794	0.165079	1.07155	-0.0031113	-0.0113226	0.0518657	0.228785	0.075568	0.61809
P61221.VIVFDGVPSkNTVANSPQTLLAGMNK	ABCE1	K541k	ABCE1.K541k	ABCE1	1.25	0.25	0.5	0.75	-1.58496	-1.52259	0.415037	0.171537	0.415037	-1.13061	-0.286047	-1.83211	-0.0812385	-0.330628	-0.204809	-1.34236	0.054169	0.238324	0.136499	0.798755	0.0883574	0.439884	-0.0317682	-0.222472	0.0359915	0.149395	-0.182435	-1.24837	0.0176888	0.0683026	0.0981391	0.89639
P61221.LKPDEGGEVPVLNVSYKPQkISPK	ABCE1	K415k	ABCE1.K415k	ABCE1	1.5	0.25		1.75	-1.80735	-1.0823	3	1.45158	3	-2.44957	-0.205059	-1.07015	0.0443935	0.151815	-0.249452	-1.2088	0.322504	3.17776	-0.00238999	-0.00859001	0.390941	4.54156	0.125365	1.44116	0.235092	1.87204	0.210731	1.56672	0.26008	2.2168	0.0109456	0.0627099
P61221.ADIFMFDEPSSYLDVkQR	ABCE1	K250k	ABCE1.K250k	ABCE1	4.25	2.5	3.5	4.25	-0.710493	-0.891163	0.263034	0.285063	0.263034	-1.63505	-0.151093	-0.512767	0.29673	0.658343	-0.447823	-1.02145	0.113212	0.613727	0.1676	1.08113	0.203356	1.45861	-0.0209864	-0.137567	0.0815417	0.401128	-0.01617	-0.0620581	-0.0985317	-0.514579	0.0439019	0.303973
P61221.VAETANEEEVkK	ABCE1	K343k	ABCE1.K343k	ABCE1	1.5	1	1.75	1	-0.485427	-0.407821	-0.678072	-0.748885	-0.678072	-0.233898	-0.126894	-0.140396	0.167391	0.199108	-0.294285	-0.455808	-0.179338	-1.19865	0.205889	1.4876	-0.0617381	-0.279347	-0.148646	-1.89886	-0.0415534	-0.176231	0.0691887	0.325491	-0.0151464	-0.0578905	-0.0497565	-0.355677
P61221.AIIkPQYVDQIPK	ABCE1	K169k	ABCE1.K169k	ABCE1	2.25	2.25	1.5	2.75			0.777608	1.75778	0.777608	-0.708742	-0.11007	-0.358979	-0.0813828	-0.246839	-0.0286871	-0.0849535	-0.0985528	-0.508321	0.348734	3.6643	0.249684	2.03809	-0.172593	-2.44395	0.087178	0.437539	0.185103	1.27677	0.169591	1.1162	-0.0439977	-0.304796
P61221.AAkGTVGSILDR	ABCE1	K181k	ABCE1.K181k	ABCE1	1.75	2	2.5	1.25	0.169925	0.14814	-0.874469	-1.75778	-0.874469	1.12914	0.0837347	0.0916992	0.0881357	0.130247	-0.00440103	-0.000660575	-0.221823	-1.67694	0.283417	2.5293	0.0414977	0.174055	-0.194955	-3.02644	-0.043563	-0.186186	0.200503	1.44725	0.192094	1.35278	-0.109659	-1.05708
P61221.PGEVLGLVGTnGIGkSTALK	ABCE1	K116k	ABCE1.K116k	ABCE1	2.25	2.75	2	4	0.263034	0.683964	0.917538	1.30255	0.917538	-1.12914	0.219762	2.26526	0.182455	0.807973	0.0373078	0.062791	-0.179395	-1.19924	-0.00793977	-0.0291876	-0.175315	-1.15768	-0.0661587	-0.564459	-0.161277	-1.03463	-0.183903	-1.26396	-0.168465	-1.10497	0.0101661	0.0579722
P61221.STALkILAGK	ABCE1	K121k	ABCE1.K121k	ABCE1	0.25	0.5	0.75	0.75	0.584963	0.26967				-0.26967	0.15172	1.09277	0.132755	0.696527	0.0189643	0.10742	0.400406	4.75535	-0.181339	-1.2193	0.322869	3.18424	0.224476	3.91432	-0.0996845	-0.522681	0.0823597	0.406338	0.104973	0.56052	-0.0817926	-0.690137
P61221.AIIKPQYVDQIPKAAk	ABCE1	K181k	ABCE1.K181k	ABCE1	1.25		0.25	0.75	-2.58496	-1.09906	1	0.396592	1	-1.45158	0.0531809	0.376712	0.0307084	0.212033	0.0224725	0.150242	0.266138	2.27008	0.122158	0.682213	0.39152	4.55444	0.0555572	0.446951	0.258134	2.18877	-0.149918	-0.928133	0.149817	0.927206	0.183338	2.41599
P61221.TQAIVcQQLDLTHLkER	ABCE1	K210k	ABCE1.K210k	ABCE1	4.25	3.75	4.25	3.25	-0.169925	-0.299374	-0.36257	-0.888034	-0.36257	-0.299374	0.0455259	0.0942684	-0.0262375	-0.0596211	0.0717633	0.154176	0.224027	1.70409	0.0879308	0.437106	0.337614	3.45279	0.0525148	0.415269	-0.139184	-0.832644	0.128051	0.738791	-0.0541362	-0.240852	-0.120069	-1.21361
P61221.KDETkTQAIVcQQLDLTHLK	ABCE1	K195k	ABCE1.K195k	ABCE1	0.25	0.25		0.5			1.58496	0.740669	1.58496	-0.621125	0.0603372	0.120466	-0.0121895	-0.0479927	0.0725267	0.200049	0.193865	1.3527	0.0266698	0.10563	0.312086	2.99623	0.0645148	0.545504	-0.10609	-0.568654	0.103395	0.549114	0.0327584	0.134273	-0.0941218	-0.84337
P61221.LKPDEGGEVPVLNVSYKPQk	ABCE1	K415k	ABCE1.K415k	ABCE1	1.75	2.25	1.5	4	0.321928	0.176289	1.28011	2.48012	1.28011	-2.05668	0.256676	1.09302	0.173555	0.736943	0.0831214	0.36355	-0.151492	-0.929725	-0.295974	-2.72804	-0.411019	-5.00293	0.0557508	0.448998	-0.340955	-3.5728	-0.142257	-0.859478	-0.243347	-1.98232	-0.0892751	-0.781441
NA	ABCE1	K158k	NA	ABCE1	NA	NA	NA	NA	NA	NA	NA	NA	NA		-0.0368284	-0.362377	-0.15366	-1.20036	0.116832	0.916181	-0.0633271	-0.288214	0.20098	1.43171	0.172584	1.13029	-0.101987	-1.04807	0.164419	1.06509	0.0196742	0.0765759	0.222086	1.70534	0.065034	0.504049
P61221.ILEDDLkAIIKPQYVDQIPK	ABCE1	K165k	ABCE1.K165k	ABCE1	0.75	1.5		0.25	0.807355	0.623013	1	0.407821	1	-0.621125	0.179349	0.297737	-0.219651	-0.675169	0.399	0.974483	-0.0382946	-0.158664	0.174459	1.14906	0.166914	1.07445	-0.0820943	-0.762595	0.031122	0.0401792	0.104982	0.0489733	0.219952	0.303581	0.0165908	0.0216657
NA	ABCF1	K340k	NA		NA	NA	NA	NA	NA	NA	NA	NA	NA		-0.0368284	-0.362377	-0.15366	-1.20036	0.116832	0.916181	-0.0633271	-0.288214	0.20098	1.43171	0.172584	1.13029	-0.101987	-1.04807	0.164419	1.06509	0.0196742	0.0765759	0.222086	1.70534	0.065034	0.504049
NA	ABCF1	K430k	NA		NA	NA	NA	NA	NA	NA	NA	NA	NA		-0.0368284	-0.362377	-0.15366	-1.20036	0.116832	0.916181	-0.0633271	-0.288214	0.20098	1.43171	0.172584	1.13029	-0.101987	-1.04807	0.164419	1.06509	0.0196742	0.0765759	0.222086	1.70534	0.065034	0.504049
NA	ABCF1	K451k	NA		NA	NA	NA	NA	NA	NA	NA	NA	NA		-0.0368284	-0.362377	-0.15366	-1.20036	0.116832	0.916181	-0.0633271	-0.288214	0.20098	1.43171	0.172584	1.13029	-0.101987	-1.04807	0.164419	1.06509	0.0196742	0.0765759	0.222086	1.70534	0.065034	0.504049
Q9UG63.TRLELEENQMkR	ABCF2	K326k	ABCF2.K326k		0.75	0.5	1.5	0.25	-0.415037	-0.26967	-1.80735	-1.75778	-1.80735	1.39347	-0.00439262	-0.00409039	0.256634	1.00089	-0.261026	-1.065	-0.269648	-2.32143	-0.251473	-2.06262	-0.44006	-5.72498	-0.00701324	-0.0420687	-0.195036	-1.38544	-0.0516306	-0.227545	-0.0921979	-0.470987	-0.064432	-0.497826
Q9UG63.TLQkMMASGLTER	ABCF2	K365k	ABCF2.K365k		2.5	2.75	2.75	1.25	0.125531	0.0758772	-1	-1.16363	-1	0.658516	0.156382	0.595982	0.302269	1.25388	-0.145887	-0.826717	0.0278332	0.110741	-0.162088	-1.02806	-0.123147	-0.689987	0.0732843	0.6498	0.0499696	0.218846	-0.0531071	-0.23536	0.125877	0.721066	0.0463124	0.324923
Q9UG63.YYTGNYDQYVkTR	ABCF2	K315k	ABCF2.K315k		2.5	2.25	2.75	2	-0.137504	-0.0919677	-0.415037	-1.23906	-0.415037	-0.257531	0.0387163	0.219811	0.0657023	0.45867	-0.026986	-0.167862	0.278031	2.44675	-0.162032	-1.02752	0.267615	2.29161	0.169805	2.37643	0.295875	2.76971	-0.21016	-1.55992	0.196597	1.40295	0.227362	3.53907
Q9UG63.VVSDkTLSFYFPPcGK	ABCF2	K379k	ABCF2.K379k		0.25	0.25		0.5			1.58496	0.740669	1.58496	-0.621125	0.0603372	0.120466	-0.0121895	-0.0479927	0.0725267	0.200049	0.193865	1.3527	0.0266698	0.10563	0.312086	2.99623	0.0645148	0.545504	-0.10609	-0.568654	0.103395	0.549114	0.0327584	0.134273	-0.0941218	-0.84337
Q9UG63.LVDEEPQLTkR	ABCF2	K618k	ABCF2.K618k		2	3.5	3	3	0.736966	0.988311				0.974838	0.0709471	0.289582	0.0194554	0.0937082	0.0514916	0.253654	-0.196275	-1.3792	0.225411	1.72128	-0.125572	-0.709197	-0.162715	-2.20959	0.0207134	0.080956	0.101413	0.534923	0.179912	1.22181	-0.0362582	-0.240618
Q9UG63.YGLTGkQQVSPIR	ABCF2	K508k	ABCF2.K508k		2.75	2.75	3.5	2.75			-0.321928	-0.494469	-0.321928	-0.639402	-0.0504228	-0.241722	-0.149482	-0.698783	0.0990591	0.62709	-0.0230674	-0.0900784	0.141987	0.845599	0.0951392	0.484968	-0.0636888	-0.536083	-0.0266028	-0.106435	-0.0090488	-0.0337408	-0.054731	-0.244043	-0.00788704	-0.0443616
Q9UG63.VALVGPnGAGkSTLLK	ABCF2	K436k	ABCF2.K436k		4.75	5.75	4.25	3.25	0.263034	0.552113	-0.36257	-0.888034	-0.36257	1.13387	0.0238392	0.157382	-0.0447426	-0.38408	0.0685817	0.722607	0.190151	1.31239	0.138743	0.817758	0.365681	4.00203	0.0198365	0.129101	0.160626	1.02837	0.0473331	0.205234	0.0694488	0.327026	0.0509026	0.366129
Q9UG63.LEELDADkAEMR	ABCF2	K203k	ABCF2.K203k		1.25	1.5			0.222392	0.133486		NA		-0.346609	0.129308	0.835172	0.00414792	0.0216159	0.12516	0.845656	0.289485	2.62423	-0.0727091	-0.342397	0.358201	3.85064	0.139759	1.71602	0.14795	0.910257	-0.0600708	-0.273252	-0.0137482	-0.0522506	0.093464	0.834835
Q9UG63.LELEENQMkR	ABCF2	K326k	ABCF2.K326k		0.25	0.5	0.5	1.25	0.584963	0.26967	1	1.00815	1	-0.621125	0.179349	0.297737	-0.219651	-0.675169	0.399	0.974483	-0.0382946	-0.158664	0.174459	1.14906	0.166914	1.07445	-0.0820943	-0.762595	0.031122	0.0401792	0.104982	0.0489733	0.219952	0.303581	0.0165908	0.0216657
Q9UG63.AmLEkEAER	ABCF2	K174k	ABCF2.K174k		1	2.25	1.75	0.5	1	1.09906	-1.41504	-1.0823	-1.41504	1.94899	0.112908	1.02338	-0.0696904	-0.425672	0.182598	1.0242	0.0173952	0.0664197	-0.00370177	-0.0133761	-0.0273345	-0.108545	0.00814062	0.0491884	-0.183694	-1.26173	0.310757	3.02118	0.0520497	0.229756	-0.222157	-3.39266
Q9UG63.SkLVDEEPQLTK	ABCF2	K608k	ABCF2.K608k		2.25	1	0.25	1	-1	-1.09906	1.32193	1.23906	1.32193		0.0453326	0.458698	-0.115737	-0.916626	0.16107	1.2429	-0.0829251	-0.405018	0.00616567	0.0225035	-0.119008	-0.657732	-0.0343771	-0.244549	-0.159824	-1.02069	-0.258787	-2.19815	-0.175723	-1.17836	0.0444639	0.308815
NA	ABCF3	K414k	NA		NA	NA	NA	NA	NA	NA	NA	NA	NA		-0.288678	-1.46751	-0.0991056	-0.436953	-0.189572	-0.840701	0.238615	1.88992	0.200258	1.42358	0.455863	6.14684	0.0148005	0.0933209	0.310517	3.01701	-0.0336664	-0.138485	0.141602	0.853726	0.154642	1.81486
NA	ABCF3	K457k	NA		NA	NA	NA	NA	NA	NA	NA	NA	NA		-0.288678	-1.46751	-0.0991056	-0.436953	-0.189572	-0.840701	0.238615	1.88992	0.200258	1.42358	0.455863	6.14684	0.0148005	0.0933209	0.310517	3.01701	-0.0336664	-0.138485	0.141602	0.853726	0.154642	1.81486
NA	ABCF3	K536k	NA		NA	NA	NA	NA	NA	NA	NA	NA	NA		-0.288678	-1.46751	-0.0991056	-0.436953	-0.189572	-0.840701	0.238615	1.88992	0.200258	1.42358	0.455863	6.14684	0.0148005	0.0933209	0.310517	3.01701	-0.0336664	-0.138485	0.141602	0.853726	0.154642	1.81486
Q9NUQ8.ITENYDcGTkLPGLLK	ABCF3	K105k	ABCF3.K105k			0.5	0.5	0.25	1.58496	0.740669	-0.584963	-0.26967	-0.584963	1.00815	-0.239576	-1.5398	-0.219722	-0.991597	-0.019854	-0.111329	0.304974	2.87598	0.0688826	0.319917	0.444915	5.85233	0.0910996	0.886441	0.347168	3.2944	0.0875718	0.3356	0.256488	1.81695	0.157523	1.40606
Q9NUQ8.PLASLSGGQkSR	ABCF3	K616k	ABCF3.K616k		1.5	0.75	0.5	1.25	-0.807355	-1.00815	1	1.00815	1	-2.26568	0.0479504	0.164656	0.0613566	0.477465	-0.0134062	-0.102913	0.0847905	0.416867	-0.0421695	-0.177326	0.0912631	0.458988	0.0489895	0.379674	0.0196698	0.0765572	-0.018678	-0.0724091	0.0768282	0.371599	0.0172297	0.102476
Q9NUQ8.DTLkTSNPLVLEEASASQAGSR	ABCF3	K144k	ABCF3.K144k		0.75	0.25	0.25	0.5	-1	-0.24838	0.584963	0.26967	0.584963	-1.00815	0.0310007	0.189316	-0.016505	-0.0728401	0.0475057	0.216441	0.0159153	0.0604115	0.00976532	0.0361642	0.0969387	0.497223	0.00237306	0.0138109	0.0932939	0.478419	0.18826	1.31082	0.06647	0.3096	-0.0426685	-0.293434
Q9NUQ8.LPELkPVDK	ABCF3	K468k	ABCF3.K468k		0.5			0.75	-1.58496	-0.740669	2	1.23906	2	-1.81269	-0.173938	-0.764252	-0.254487	-1.6979	0.0805489	0.603367	0.012974	0.048671	-0.0203923	-0.078795	0.0422568	0.177752	0.0128749	0.0801926	-0.0725629	-0.345591	-0.0794563	-0.387961	-0.075702	-0.364666	0.00309719	0.0169199
Q9NUQ8.IcVVGEnGAGkSTMLK	ABCF3	K531k	ABCF3.K531k		0.5	1	0.5	0.25	0.736966	0.320564	-0.584963	-0.26967	-0.584963	0.526047	0.00255267	0.0200967	-0.0535463	-0.360136	0.056099	0.625601	-0.0326162	-0.13221	0.108406	0.578248	0.0989174	0.510841	-0.0544158	-0.43496	-0.0273149	-0.109592	-0.185689	-1.28306	0.036998	0.154175	0.0711577	0.569152
NA	ABCF3	K221k	NA		NA	NA	NA	NA	NA	NA	NA	NA	NA		-0.0368284	-0.362377	-0.15366	-1.20036	0.116832	0.916181	-0.0633271	-0.288214	0.20098	1.43171	0.172584	1.13029	-0.101987	-1.04807	0.164419	1.06509	0.0196742	0.0765759	0.222086	1.70534	0.065034	0.504049
Q9NUQ8.ASVILAGLGFTPkMQQQPTR	ABCF3	K319k	ABCF3.K319k		0.75	0.75	0.75	0.5			-0.415037	-0.171537	-0.415037	-0.26967							-0.223773	-1.70095	-0.025326	-0.0997811	-0.156654	-0.97702	-0.0765739	-0.690964	0.0250574	0.0900639	0.031398	0.122692	0.00857347	0.0311093	-0.00422911	-0.0217738
NA	ABCF3	K294k	NA		NA	NA	NA	NA	NA	NA	NA	NA	NA								-0.0290044	-0.0476314	0.106338	0.194242	0.174258	0.276219	-0.0418157	-0.131206	-0.123023	-0.315126	0.292384	0.958525	-0.115918	-0.303335	-0.205728	-0.984638
NA	ABCG1	K102k	NA		NA	NA	NA	NA	NA	NA	NA	NA	NA		-0.288678	-1.46751	-0.0991056	-0.436953	-0.189572	-0.840701	0.238615	1.88992	0.200258	1.42358	0.455863	6.14684	0.0148005	0.0933209	0.310517	3.01701	-0.0336664	-0.138485	0.141602	0.853726	0.154642	1.81486
NA	ABCG1	K189k	NA		NA	NA	NA	NA	NA	NA	NA	NA	NA		-0.288678	-1.46751	-0.0991056	-0.436953	-0.189572	-0.840701	0.238615	1.88992	0.200258	1.42358	0.455863	6.14684	0.0148005	0.0933209	0.310517	3.01701	-0.0336664	-0.138485	0.141602	0.853726	0.154642	1.81486
NA	ABCG1	K354k	NA		NA	NA	NA	NA	NA	NA	NA	NA	NA		-0.288678	-1.46751	-0.0991056	-0.436953	-0.189572	-0.840701	0.238615	1.88992	0.200258	1.42358	0.455863	6.14684	0.0148005	0.0933209	0.310517	3.01701	-0.0336664	-0.138485	0.141602	0.853726	0.154642	1.81486
Q9UNQ0.ATEIIEPSkQDKPLIEK	ABCG2	K323k	ABCG2.K323k		4.5	2.25	5.5	4.75	-0.925999	-2.94305	-0.201634	-0.623013	-0.201634	-1.36094	-0.278749	-0.365301	0.0469302	0.273153	-0.32568	-2.17349	0.0589235	0.263859	0.0230215	0.0898828	0.0129631	0.048628	0.0138534	0.0868259	-0.198421	-1.42355	-0.120852	-0.68085	-0.297967	-2.80427	-0.0348519	-0.229464
Q8N2K0.YIYkSPELPR	ABHD12	K377k	ABHD12.K377k		1.25	1	1.5	1	-0.263034	-0.204865	-0.485427	-0.407821	-0.485427	-0.233898	0.157183	0.720838	0.21722	1.13534	-0.0600373	-0.286217	0.294134	2.69836	-0.0744888	-0.353031	0.302303	2.83159	0.142239	1.76602	-0.0577746	-0.260567	-0.00864524	-0.032183	-0.0120924	-0.0456507	-0.0220738	-0.135073
Q6UXT9.LQPFGDPSDLkEAVTYIR	ABHD15	K216k	ABHD15.K216k		0.25	0.75	1.5	1	1	0.396592	-0.485427	-0.740669	-0.485427	0.893105	0.10227	0.598205	0.113892	0.528941	-0.0116224	-0.00265453	-0.252236	-2.07315	0.207916	1.511	-0.140569	-0.833376	-0.177557	-2.56692	-0.348317	-3.71602	0.151156	0.939462	-0.0794031	-0.387627	-0.224413	-3.45565
NA	ABHD16A	K452k	NA		NA	NA	NA	NA	NA	NA	NA	NA	NA		0.225299	1.33686	0.111213	0.750612	0.114086	0.721064	0.137788	0.809646	-0.0390757	-0.162385	0.228239	1.75667	0.0682456	0.588916	0.04315	0.184129	0.119305	0.668674	-0.00999796	-0.0374243	-0.0342163	-0.224474
Q96GS6.TYcFDAFPNIEkVSK	ABHD17A	K239k	ABHD17A.K239k		0.5			0.75	-1.58496	-0.740669	2	0.667218	2	-1.09906	-0.00105972	-0.00169698	-0.0503553	-0.115389	0.0492956	0.238447	-0.152221	-0.936338	-0.261683	-2.20587	-0.408841	-4.95142	0.0422377	0.314783	-0.247996	-2.04598	-0.124392	-0.709076	-0.0474787	-0.205979	-0.0555352	-0.409482
Q96GS6.ELDTIEVFPTkSAR	ABHD17A	K92k	ABHD17A.K92k		0.5	0.25	1.75	0.75	-0.584963	-0.26967	-1	-0.888034	-1	-0.639402	0.00424794	0.00859119	-0.189796	-0.382987	0.194043	0.509534	0.0331171	0.134501	0.212578	1.56559	0.129916	0.744218	-0.069248	-0.600821	-0.129521	-0.750884	0.031673	0.129274	-0.0201011	-0.0783708	-0.0724245	-0.583031
Q5VST6.EkDAIEcFMTR	ABHD17B	K63k	ABHD17B.K63k		1.5	0.25		0.5	-1.80735	-1.0823	1.58496	0.740669	1.58496	-2.40257	-0.29237	-1.12908	-0.206359	-1.05808	-0.086011	-0.905214
Q5VST6.VAFPDTKk	ABHD17B	K207k	ABHD17B.K207k		0.75	0.25	1.5	0.25	-1	-0.396592	-1.80735	-0.831308	-1.80735	-1.10712	0.0808281	0.420789	0.114323	0.640501	-0.0334948	-0.152343	0.0999034	0.517683	-0.00328866	-0.0118634	0.126435	0.716093	0.0398183	0.292564	0.208063	1.53507	-0.253241	-2.11917	0.104232	0.555151	0.207264	2.99445
Q5VST6.IASkLAFLPPDPTYTLMcDESGSR	ABHD17B	K25k	ABHD17B.K25k		1.5	0.5		0.75	-1.22239	-1.30255	2	1.23906	2	-2.40257	0.519563	2.14884	0.421469	1.96419	0.098094	0.0951023	-0.44011	-5.72628	0.0458828	0.195681	-0.366396	-4.01671	-0.187528	-2.82476	-0.0443566	-0.190155	-0.0917851	-0.4682	-0.141248	-0.850625	0.0213097	0.129817
Q5VST6.TYcFDAFPNIDkISK	ABHD17B	K219k	ABHD17B.K219k		1.5	1	0.75	0.5	-0.485427	-0.740669	-0.415037	-0.26967	-0.415037	-0.346609	-0.100197	-0.101795	-0.347163	-0.331704	0.246966	0.19968	0.165525	1.061	0.0458359	0.195446	0.216509	1.61243	0.0461841	0.352191	0.253605	2.08875	-0.0640014	-0.291096	0.217771	1.62319	0.140881	1.54998
Q6PCB6.IAAkLAFLPPEPTYTVLAPEQR	ABHD17C	K32k	ABHD17C.K32k			0.5	0.25	0.75	1.58496	0.740669	1	0.396592	1		0.0940249	1.08849	0.0722827	0.838313	0.0217423	0.388971	0.193265	1.34614	0.079562	0.383981	0.294809	2.70923	0.043874	0.330117	0.0432445	0.184599	0.0757794	0.365141	-0.020975	-0.0820643	-0.014618	-0.0856078
Q6PCB6.kTYcFDAFPSIDK	ABHD17C	K248k	ABHD17C.K248k		0.75		1.75	1.25	-2	-1.23906	-0.415037	-0.396592	-0.415037	-0.407821							0.176366	1.16832	0.0438108	0.185382	0.270599	2.33546	0.0511487	0.401334	-0.118614	-0.663273	-0.0705734	-0.333689	0.0287416	0.115966	-0.0215847	-0.131704
Q0P651.FNQTLSTNkSGYTSR	ABHD18	K314k	ABHD18.K314k		2	2.5	2.5	2	0.289507	0.443709	-0.289507	-0.740669	-0.289507	1.39234	0.169115	1.57505	0.0650291	0.623397	0.104086	0.802893	-0.22643	-1.73398	-0.0811778	-0.394036	-0.389561	-4.51092	-0.056048	-0.452147	0.0801857	0.392548	0.00630897	0.0232629	-0.0738289	-0.35324	0.0331929	0.216505
P08910.FYNFLMADNMkK	ABHD2	K265k	ABHD2.K265k		1.75	2	2.75	2.5	0.169925	0.204865	-0.125531	-0.26967	-0.125531	-0.443709	0.122569	0.732166	0.20173	0.599414	-0.0791604	-0.163943	0.12273	0.686707	0.162857	1.03539	0.293051	2.68098	-0.0154836	-0.0980513	0.126472	0.725901	-0.075173	-0.361426	0.132693	0.777292	0.0905994	0.798143
P08910.SGHIQTALYGkMGR	ABHD2	K85k	ABHD2.K85k		0.25		0.25	0.5	-1	-0.407821	0.584963	0.26967	0.584963	-0.740669	0.112592	0.669833	0.140153	0.716586	-0.0275613	-0.128127	0.0656321	0.301234	-0.431976	-5.51724	-0.239668	-1.90375	0.19201	2.94547	0.0318985	0.130309	-0.309665	-3.00229	-0.303694	-2.90021	0.153465	1.79225
P08910.ScPLLTkEYIPPLIWGK	ABHD2	K64k	ABHD2.K64k		0.5	0.75	0.75	1	0.415037	0.26967	0.321928	0.204865	0.321928		0.0149696	0.0341462	-0.041896	-0.219943	0.0568656	0.28806	0.0613362	0.277118	0.205991	1.48877	0.2823	2.51205	-0.0558175	-0.449704	0.0675759	0.316032	-0.136223	-0.807171	0.0579437	0.261495	0.0915668	0.810447
P08910.TFVDYAQknGYR	ABHD2	K152k	ABHD2.K152k		2.25	3.5	4.75	2.5	0.584963	0.831308	-0.862496	-1.19178	-0.862496	2.06458	0.0285177	0.33536	-0.0644788	-0.241067	0.0929966	0.431533	-0.19387	-1.35276	-0.0908051	-0.455955	-0.327906	-3.27448	-0.0397694	-0.292121	-0.156082	-0.985224	-0.233533	-1.8516	-0.350741	-3.76397	0.0347984	0.229043
P08910.QALFGDHVKkPQSLEDTDLSR	ABHD2	K282k	ABHD2.K282k		1.5	1	1.5	0.75	-0.485427	-0.20735	-0.807355	-0.409386	-0.807355	-0.10742							-0.252936	-2.08282	-0.123755	-0.694778	-0.382265	-4.35122	-0.0498467	-0.388219	0.149622	0.925435	-0.108623	-0.587281	0.0264648	0.105825	0.11603	1.15158
P08910.kPQSLEDTDLSR	ABHD2	K282k	ABHD2.K282k		4.5	5.75	3.5	2.75	0.337035	1.0823	-0.321928	-0.611516	-0.321928	2.88249							-0.020376	-0.0787269	-0.258445	-2.15984	-0.30284	-2.84049	0.0918626	0.897339	-0.138059	-0.822922	0.0611811	0.279453	-0.116527	-0.647063	-0.0895185	-0.784499
P08910.FLLkScPLLTK	ABHD2	K57k	ABHD2.K57k		1.25	2.5	4.5	4.75	0.874469	1.0823	0.0740006	0.26967	0.0740006	0.849474							-0.304352	-2.86561	-0.256522	-2.13277	-0.578299	-10.2523	-0.0184561	-0.119083	-0.207949	-1.53372	-0.0950556	-0.490462	-0.329359	-3.35426	-0.0507229	-0.364482
Q8WU67.PFITSkPPVQYR	ABHD3	K102k	ABHD3.K102k		1	0.25	1.5	1.25	-1.32193	-0.748885	-0.222392	-0.101919	-0.222392	-0.299374	-0.111204	-1.39356	-0.0745287	-1.4601	-0.0366754	-1.377	-0.214938	-1.59362	0.264977	2.25324	-0.00178559	-0.0064019	-0.185183	-2.76279	0.00927428	0.0346133	0.201009	1.45303	0.114944	0.634887	-0.0861463	-0.742632
Q8WU67.GQTLLRPFITSkPPVQYR	ABHD3	K102k	ABHD3.K102k		1	0.75	2	1.25	-0.321928	-0.0880597	-0.584963	-0.378828	-0.584963	-0.223324	-0.102756	-0.856009	-0.060917	-0.421747	-0.0418389	-0.292454	-0.201241	-1.43465	0.146795	0.887673	-0.0979649	-0.504267	-0.134295	-1.60864	-0.177198	-1.19357	-0.0855955	-0.427194	-0.218632	-1.6625	-0.0411572	-0.280688
Q8WU67.LkSVGIPVLcLNSVDDVFSPSHAIPIETAK	ABHD3	K332k	ABHD3.K332k		1	0.75	0.5		-0.321928	-0.1066	-1.58496	-0.407821	-1.58496	0.118718	-0.0589149	-0.632529	-0.0828669	-1.6684	0.0239521	0.187742	-0.00361666	-0.013064	0.0260193	0.102791	-0.0425372	-0.179123	-0.0114355	-0.0705756	-0.173754	-1.15822	0.154797	0.973178	0.0410696	0.173856	-0.147618	-1.68222
Q8WU67.kPQLVTGGESFSR	ABHD3	K55k	ABHD3.K55k		3	4.75	4.25	4.75	0.621488	1.18397	0.152003	0.683964	0.152003	0.854029							-0.138082	-0.812139	-0.0466558	-0.19956	-0.153663	-0.949477	-0.0352782	-0.252315	0.126689	0.727661	-0.107016	-0.575434	0.00662871	0.0244739	0.105004	0.990583
Q8TB40.ILQcLQNkFLAR	ABHD4	K42k	ABHD4.K42k		2	2.25	0.5	1.25	0.152003	0.407821	1	1.00815	1	-0.683964	-0.160766	-1.34985	-0.135696	-1.00767	-0.0250696	-0.251813	-0.0933682	-0.473027	-0.296548	-2.73733	-0.24608	-1.98916	0.0784002	0.714306	-0.175148	-1.17246	-0.158589	-1.00892	-0.0100676	-0.0376956	-0.00743974	-0.0417326
Q8TB40.PTSMSQLkNVEAR	ABHD4	K29k	ABHD4.K29k		2	2.5	2.75	1.75	0.289507	0.443709	-0.584963	-1.52259	-0.584963	2.09432	-0.0426782	-0.372347	-0.0314776	-0.201658	-0.0112006	-0.0644981	-0.0545524	-0.240354	0.133483	0.773546	0.073507	0.347151	-0.0725564	-0.640843	-0.0185164	-0.0717359	0.131585	0.768015	-0.0540972	-0.240643	-0.0674404	-0.529241
Q8TB40.DVPITMIYGSDTWIDTSTGKk	ABHD4	K300k	ABHD4.K300k		0.25	0.5	0.25	0.25	0.584963	0.26967				-0.26967	0.15172	1.09277	0.132755	0.696527	0.0189643	0.10742	0.400406	4.75535	-0.181339	-1.2193	0.322869	3.18424	0.224476	3.91432	-0.0996845	-0.522681	0.0823597	0.406338	0.104973	0.56052	-0.0817926	-0.690137
NA	ABHD4	K192k	NA		NA	NA	NA	NA	NA	NA	NA	NA	NA		0.225299	1.33686	0.111213	0.750612	0.114086	0.721064	0.137788	0.809646	-0.0390757	-0.162385	0.228239	1.75667	0.0682456	0.588916	0.04315	0.184129	0.119305	0.668674	-0.00999796	-0.0374243	-0.0342163	-0.224474
Q8TB40.YVSLPNQNkIWTVTVSPEQNDR	ABHD4	K55k	ABHD4.K55k		2	2	1.75	1.75													0.149478	0.911581	0.028555	0.113934	0.140447	0.832327	0.0466601	0.356802	-0.0642932	-0.29707	-0.0513404	-0.226018	-0.111032	-0.605238	-0.00581973	-0.0323259
Q8IZP0.TLEPVkPPTVPNDYMTSPAR	ABI1	K205k	ABI1.K205k		0.25	0.25		0.75			2	1.23906	2	-1.10712	-0.100487	-0.546933	0.0263021	0.0771564	-0.126789	-0.633465	-0.00582324	-0.0212242	-0.0269298	-0.106769	-0.0670727	-0.309468	0.00814431	0.0492119	-0.137849	-0.821119	-0.142022	-0.857408	-0.110923	-0.604417	0.00187464	0.0101647
Q8IZP0.VADYcENNYIQATDkR	ABI1	K43k	ABI1.K43k		1	1	1.5	1.5		NA					-0.0314988	-0.221754	-0.120538	-0.740325	0.0890394	0.569424	0.101969	0.532141	0.297558	2.75373	0.41739	5.15566	-0.0754709	-0.677036	0.20976	1.55516	-0.0672519	-0.314143	0.0568491	0.255508	0.124462	1.28297
NA	ABI2	K167k	NA		NA	NA	NA	NA	NA	NA	NA	NA	NA		0.225299	1.33686	0.111213	0.750612	0.114086	0.721064	0.137788	0.809646	-0.0390757	-0.162385	0.228239	1.75667	0.0682456	0.588916	0.04315	0.184129	0.119305	0.668674	-0.00999796	-0.0374243	-0.0342163	-0.224474
Q9NX38.FEESkSITEGLLTQK	ABITRAM	K154k	ABITRAM.K154k		1.5	0.75	1.75	0.75	-0.807355	-0.623013	-1	-0.888034	-1	-0.139899	0.257095	0.941063	-0.126525	-0.36913	0.38362	1.51007	-0.0901204	-0.451437	-0.0265081	-0.104923	-0.256388	-2.1309	-0.0245458	-0.164487	-0.264958	-2.28797	0.0549255	0.245089	-0.294888	-2.7535	-0.143724	-1.61103
NA	ABL1	K707k	NA		NA	NA	NA	NA	NA	NA	NA	NA	NA		0.225299	1.33686	0.111213	0.750612	0.114086	0.721064	0.137788	0.809646	-0.0390757	-0.162385	0.228239	1.75667	0.0682456	0.588916	0.04315	0.184129	0.119305	0.668674	-0.00999796	-0.0374243	-0.0342163	-0.224474
Q12979.IMGkGQIQLDPQTVETK	ABR	K593k	ABR.K593k		1.75	0.75	0.75		-1	-1.52259	-2	-1.23906	-2	0.407821	-0.00952854	-0.0825918	0.0993677	0.475544	-0.108896	-0.530876	0.0451549	0.192047	0.290286	2.63691	0.298692	2.77222	-0.0945876	-0.936785	0.0420408	0.178633	-0.101746	-0.537301	-0.0882491	-0.444595	0.0646036	0.499597
Q12979.AFVDNYkVALETAEK	ABR	K192k	ABR.K192k		1	1	1.5	2			0.36257	0.740669	0.36257	-0.511353	-0.292802	-0.674052	-0.057588	-0.0706279	-0.235214	-0.393051	-0.181355	-1.21947	-0.291333	-2.65355	-0.457973	-6.20478	0.0424367	0.316634	-0.314888	-3.09331	-0.0790131	-0.385184	-0.222464	-1.71006	-0.105979	-1.00433
Q12979.TAVTTPkGETR	ABR	K296k	ABR.K296k		0.25	0.5	0.5	0.75	0.584963	0.26967	0.415037	0.26967	0.415037		-0.254299	-2.05381	-0.166022	-1.0739	-0.088277	-0.370522	0.00266824	0.00960099	-0.0856176	-0.422162	-0.108373	-0.578008	0.0340665	0.241888	0.0362512	0.150625	-0.0374748	-0.15645	-0.13718	-0.81537	0.0331251	0.21598
Q12979.LASQLGVYkAFVDNYK	ABR	K185k	ABR.K185k		0.25	0.25		0.5			1.58496	0.740669	1.58496	-0.621125	0.0603372	0.120466	-0.0121895	-0.0479927	0.0725267	0.200049	0.193865	1.3527	0.0266698	0.10563	0.312086	2.99623	0.0645148	0.545504	-0.10609	-0.568654	0.103395	0.549114	0.0327584	0.134273	-0.0941218	-0.84337
Q12979.VALETAEkcSQSNNQFQK	ABR	K200k	ABR.K200k		0.25	0.75	1.5	1	1	0.683964	-0.485427	-0.740669	-0.485427	1.55271	0.20508	0.995471	0.121136	1.12583	0.083944	0.344921	0.262297	2.21464	0.0681792	0.315843	0.304156	2.86235	0.0749034	0.669919	-0.0424155	-0.180485	0.151234	0.940182	0.0507774	0.223064	-0.0870069	-0.753216
NA	ABR	K475k	NA		NA	NA	NA	NA	NA	NA	NA	NA	NA		0.225299	1.33686	0.111213	0.750612	0.114086	0.721064	0.137788	0.809646	-0.0390757	-0.162385	0.228239	1.75667	0.0682456	0.588916	0.04315	0.184129	0.119305	0.668674	-0.00999796	-0.0374243	-0.0342163	-0.224474
NA	ABR	K932k	NA		NA	NA	NA	NA	NA	NA	NA	NA	NA		0.225299	1.33686	0.111213	0.750612	0.114086	0.721064	0.137788	0.809646	-0.0390757	-0.162385	0.228239	1.75667	0.0682456	0.588916	0.04315	0.184129	0.119305	0.668674	-0.00999796	-0.0374243	-0.0342163	-0.224474
NA	ABRACL	K51k	NA		NA	NA	NA	NA	NA	NA	NA	NA	NA		0.225299	1.33686	0.111213	0.750612	0.114086	0.721064	0.137788	0.809646	-0.0390757	-0.162385	0.228239	1.75667	0.0682456	0.588916	0.04315	0.184129	0.119305	0.668674	-0.00999796	-0.0374243	-0.0342163	-0.224474
Q6UWZ7.MkGFGEYSR	ABRAXAS1	K398k	ABRAXAS1.K398k		1	0.25	1.75	1	-1.32193	-0.748885	-0.678072	-0.748885	-0.678072		-0.0846966	-0.430369	-0.151353	-1.14834	0.0666563	0.29996	-0.15811	-0.990571	0.00988329	0.0366185	-0.239668	-1.90375	-0.0648229	-0.549036	-0.278585	-2.4937	-0.143036	-0.866342	-0.218967	-1.66663	-0.0609024	-0.461969
Q6UWZ7.AVQTHSSkFFEEDGSLK	ABRAXAS1	K201k	ABRAXAS1.K201k			0.75	1.75	0.75	2	1.23906	-1	-1.52259	-1	2.58862	0.0703553	0.836768	0.0272855	0.224511	0.0430698	0.66272	-0.240159	-1.91022	0.141735	0.843425	-0.257164	-2.14179	-0.14736	-1.87177	-0.337308	-3.50313	-0.0586563	-0.265416	-0.287026	-2.62631	-0.125198	-1.29479
Q15018.LFSFYDYASkVNEESLDR	ABRAXAS2	K74k	ABRAXAS2.K74k		2	2.5	1.75	1.5	0.289507	0.740669	-0.192645	-0.26967	-0.192645	0.936141							-0.276185	-2.41882	-0.0368801	-0.151975	-0.42515	-5.34593	-0.0923394	-0.904183	-0.235223	-1.87376	0.0751701	0.361408	-0.118094	-0.659216	-0.13946	-1.53498
Q15018.VSSVPNTSQSYAkVIK	ABRAXAS2	K187k	ABRAXAS2.K187k		1.25	2.25	2	1.75	0.736966	0.888034	-0.169925	-0.407821	-0.169925	1.13061							0.0635441	0.289431	0.166522	1.07065	0.158058	0.990085	-0.0397357	-0.291815	-0.203812	-1.48534	0.270469	2.36995	0.0596298	0.270801	-0.213095	-3.14675
Q15018.EQVLHkQLTR	ABRAXAS2	K114k	ABRAXAS2.K114k		0.25	0.5	0.25	0.75	0.584963	0.26967	1	0.683964	1	-0.26967							0.0376293	0.155509	-0.0440871	-0.186747	-0.019351	-0.0744635	0.0315316	0.2205	-0.153088	-0.957283	0.139774	0.837768	-0.053287	-0.236317	-0.131583	-1.39967
Q15018.VQAVcADVEkSER	ABRAXAS2	K229k	ABRAXAS2.K229k		0.5	0.75		0.5	0.415037	0.26967	1.58496	0.407821	1.58496	-0.170176							-0.305004	-2.87648	-0.332259	-3.35371	-0.568704	-9.8679	0.0105169	0.0645258	-0.24335	-1.98236	-0.0612822	-0.28002	-0.298867	-2.81922	-0.0818033	-0.690264
Q8N961.SLSLSSSkSNSQALNSSAQQHR	ABTB2	K36k	ABTB2.K36k		0.25	0.5	0.25	0.25	0.584963	0.26967				-0.26967	0.15172	1.09277	0.132755	0.696527	0.0189643	0.10742	0.400406	4.75535	-0.181339	-1.2193	0.322869	3.18424	0.224476	3.91432	-0.0996845	-0.522681	0.0823597	0.406338	0.104973	0.56052	-0.0817926	-0.690137
A6QL63.SNkPGELPMFSQSELR	ABTB3	K398k	ABTB3.K398k				0.5	0.75		NA	0.415037	0.26967	0.415037	-0.407821	0.0295658	0.105934	-0.0369903	-0.120107	0.0665561	0.319817	0.256295	2.12959	0.0360522	0.148091	0.410671	4.99469	0.0849842	0.801385	0.031543	0.128677	0.141822	0.855653	0.0300001	0.121645	-0.0495483	-0.353791
NA	ACAA1	K209k	NA		NA	NA	NA	NA	NA	NA	NA	NA	NA		0.225299	1.33686	0.111213	0.750612	0.114086	0.721064	0.137788	0.809646	-0.0390757	-0.162385	0.228239	1.75667	0.0682456	0.588916	0.04315	0.184129	0.119305	0.668674	-0.00999796	-0.0374243	-0.0342163	-0.224474
NA	ACAA1	K216k	NA		NA	NA	NA	NA	NA	NA	NA	NA	NA		0.225299	1.33686	0.111213	0.750612	0.114086	0.721064	0.137788	0.809646	-0.0390757	-0.162385	0.228239	1.75667	0.0682456	0.588916	0.04315	0.184129	0.119305	0.668674	-0.00999796	-0.0374243	-0.0342163	-0.224474
NA	ACAA1	K292k	NA		NA	NA	NA	NA	NA	NA	NA	NA	NA		0.225299	1.33686	0.111213	0.750612	0.114086	0.721064	0.137788	0.809646	-0.0390757	-0.162385	0.228239	1.75667	0.0682456	0.588916	0.04315	0.184129	0.119305	0.668674	-0.00999796	-0.0374243	-0.0342163	-0.224474
P42765.SLDLDISkTNVnGGAIALGHPLGGSGSR	ACAA2	K340k	ACAA2.K340k		1	1						NA			-0.0314988	-0.221754	-0.120538	-0.740325	0.0890394	0.569424	0.101969	0.532141	0.297558	2.75373	0.41739	5.15566	-0.0754709	-0.677036	0.20976	1.55516	-0.0672519	-0.314143	0.0568491	0.255508	0.124462	1.28297
P42765.VGIPkETPALTINR	ACAA2	K81k	ACAA2.K81k		1.25	1	0.5	1.25	-0.263034	-0.407821	1	0.494469	1	-0.893105	0.538633	0.850962	0.0206263	0.0151737	0.518007	0.641223	0.260687	2.19165	0.19739	1.39154	0.489673	7.1238	0.0244243	0.163549	0.253287	2.11982	0.161695	1.03865	0.219323	1.67103	0.0411524	0.280648
P42765.FGTkLGSDIK	ACAA2	K137k	ACAA2.K137k		0.5	0.5		0.25			1	0.407821	1	-0.26967							0.0376293	0.155509	-0.0440871	-0.186747	-0.019351	-0.0744635	0.0315316	0.2205	-0.153088	-0.957283	0.139774	0.837768	-0.053287	-0.236317	-0.131583	-1.39967
P42765.EEcDkYALQSQQR	ACAA2	K181k	ACAA2.K181k		1.25	0.5	0.25	0.75	-1	-1.00815	1	0.683964	1	-1.75778							0.199835	1.41883	0.258213	2.15657	0.412394	5.03564	-0.0225264	-0.149081	0.295864	2.22584	-0.201746	-1.26884	0.194634	0.985214	0.207959	2.64574
P42765.WkAANDAGYFNDEMAPIEVK	ACAA2	K191k	ACAA2.K191k		1.25	1		0.75	-0.263034	-0.204865	2	0.667218	2	-0.78439							-0.0272228	-0.108054	-0.15138	-0.92871	-0.100793	-0.523891	0.047908	0.368991	0.0168032	0.0646528	0.0474422	0.205792	-0.06625	-0.308326	-0.0137661	-0.0802112
Q13085.LTFLVAQkDFR	ACACA	K1334k	ACACA.K1334k		0.25	0.5		1.25	0.584963	0.26967	2.58496	1.81269	2.58496	-1.39347	0.119837	0.506767	0.238913	1.50464	-0.119076	-0.707893	0.353033	3.7482	-0.0653116	-0.299413	0.328558	3.28627	0.161425	2.18	0.23479	1.86807	0.0528616	0.234055	0.194682	1.38149	0.0817407	0.689522
Q13085.TYQAIkDFNR	ACACA	K2031k	ACACA.K2031k		0.75	0.75		0.75			2	1.23906	2	-1.10712	-0.100487	-0.546933	0.0263021	0.0771564	-0.126789	-0.633465	-0.00582324	-0.0212242	-0.0269298	-0.106769	-0.0670727	-0.309468	0.00814431	0.0492119	-0.137849	-0.821119	-0.142022	-0.857408	-0.110923	-0.604417	0.00187464	0.0101647
Q13085.VLIANnGIAAVkcMR	ACACA	K132k	ACACA.K132k		0.5	0.75	0.5	0.75	0.415037	0.26967	0.415037	0.171537	0.415037		-0.254299	-2.05381	-0.166022	-1.0739	-0.088277	-0.370522	0.00266824	0.00960099	-0.0856176	-0.422162	-0.108373	-0.578008	0.0340665	0.241888	0.0362512	0.150625	-0.0374748	-0.15645	-0.13718	-0.81537	0.0331251	0.21598
Q13085.MQLDNPSkVQQAELHTGSLPR	ACACA	K825k	ACACA.K825k		1	2	0.5	1.25	0.847997	0.872978	1	1.00815	1	-0.204865	-0.176954	-0.299065	-0.107669	-0.202931	-0.0692846	-0.140253
Q13085.HSDLVTkEASFEYLQNEGER	ACACA	K1435k	ACACA.K1435k		1	1	2	1.5			-0.36257	-0.320564	-0.36257	-0.443709	0.0890214	0.223131	0.146696	0.516541	-0.0576746	-0.0852525	-0.141438	-0.840854	0.446945	5.90617	0.187119	1.27996	-0.227037	-3.99817	-0.108948	-0.589694	0.122374	0.692925	0.113339	0.622649	-0.103933	-0.975597
Q13085.LLLEDLVkK	ACACA	K2229k	ACACA.K2229k		0.75		0.25	1	-2	-0.667218	1.32193	0.748885	1.32193	-1.45721	-0.110878	-0.598918	-0.0981867	-0.473478	-0.0126917	-0.046569	0.133555	0.774146	0.183488	1.24168	0.392315	4.57219	-0.0192674	-0.124951	0.0765411	0.369827	0.0353691	0.146457	0.180183	1.22465	0.0184986	0.11085
Q13085.ILNVPQELYEkGYVK	ACACA	K288k	ACACA.K288k		2.5	2.5	2	2.5			0.289507	0.443709	0.289507	-0.574189	0.0228258	0.100956	-0.00938736	-0.0336307	0.0322132	0.133096	0.0553075	0.244367	0.222555	1.68593	0.168633	1.09124	-0.064535	-0.545736	0.236848	1.8952	-0.0668116	-0.311582	-0.0126945	-0.048041	0.136434	1.48223
Q13085.LTPTGkAIPIR	ACACA	K1524k	ACACA.K1524k		1.25	2	0.5	1.25	0.584963	0.748885	1	1.00815	1		0.0940249	1.08849	0.0722827	0.838313	0.0217423	0.388971	0.193265	1.34614	0.079562	0.383981	0.294809	2.70923	0.043874	0.330117	0.0432445	0.184599	0.0757794	0.365141	-0.020975	-0.0820643	-0.014618	-0.0856078
Q13085.TcVFEkENDPSVMR	ACACA	K747k	ACACA.K747k		2	1	1.5	1.75	-0.847997	-1.03753	0.192645	0.115138	0.192645	-1.09906	0.144714	0.817583	0.0441181	0.167636	0.100596	0.426897	-0.114211	-0.621221	0.0702932	0.328143	-0.0659541	-0.303069	-0.071194	-0.624226	0.0034323	0.0125073	0.0745412	0.357569	-0.0124245	-0.0469678	-0.0319492	-0.20693
Q13085.VETQFQnGHYDkcVFALR	ACACA	K1008k	ACACA.K1008k		1.75			0.25	-3	-1.16176	1	0.407821	1	-2.3897	0.204522	1.28304	-0.0291633	-0.0674994	0.233685	0.837921	0.170212	1.10676	0.120988	0.673075	0.439874	5.72014	0.018994	0.122968	0.223893	1.72799	-0.0301307	-0.122237	0.117148	0.65187	0.114133	1.12302
Q13085.ITDIIGkEEGIGPENLR	ACACA	K1788k	ACACA.K1788k		2.75	2.75	2.75	2			-0.415037	-1.23906	-0.415037	1.23906	0.0245408	0.117131	-0.227074	-1.06482	0.251615	1.16185	0.364551	3.97892	0.195431	1.36989	0.606922	11.4764	0.0652576	0.554035	0.467453	6.58086	-0.0044635	-0.0163341	0.46234	6.43421	0.212032	3.11866
Q13085.ITSENPDEGFkPSSGTVQELNFR	ACACA	K520k	ACACA.K520k		0.5	0.75		0.75	0.415037	0.171537	2	1.23906	2	-0.396592							-0.173868	-1.14313	-0.183206	-1.23873	-0.418317	-5.17814	0.00360291	0.0211379	-0.0592706	-0.219682	-0.0886529	-0.383679	-0.328114	-2.29025	0.0149003	0.0790178
Q13085.VDWQENDFSkR	ACACA	K276k	ACACA.K276k		1.25	2.25	0.75	0.75	0.736966	0.888034				0.888034
Q13085.YLYLTPQDYkR	ACACA	K1759k	ACACA.K1759k		2	2.25	2	2	0.152003	0.14814				-0.407821							0.260847	2.19393	0.155332	0.964802	0.443418	5.81284	0.0407148	0.300734	0.371097	3.79435	0.0573337	0.213474	0.462446	5.2831	0.169379	1.70284
O00763.IPAPVEkSVR	ACACB	K1059k	ACACB.K1059k		0.75		0.25		-2	-1.23906	-1	-0.407821	-1		0.0718615	0.559035	0.147248	1.09896	-0.0753869	-0.461343	-0.12228	-0.683172	-0.244397	-1.96653	-0.301712	-2.82183	0.0471206	0.361283	-0.16514	-1.07215	0.0674808	0.315477	-0.10513	-0.561663	-0.104517	-0.983749
Q9UKU7.SLTScIDPSMGLNEEqkEFQK	ACAD8	K46k	ACAD8.K46k		0.25	0.25	0.5				-1.58496	-0.740669	-1.58496	0.855968	-0.124901	-1.16173	-0.135073	-2.07477	0.0101718	0.0786176	-0.0407226	-0.170299	-0.230318	-1.78293	-0.202826	-1.45258	0.0731583	0.648245	-0.169377	-1.11406	-0.0892774	-0.45141	-0.112788	-0.618467	-0.0359888	-0.238469
Q9UKU7.FASYcLTEPGSGSDAASLLTSAKk	ACAD8	K178k	ACAD8.K178k		1.75	1.5	0.75	1.75	-0.192645	-0.26967	1	0.888034	1	-1.75778	0.0117962	0.0481207	-0.0550466	-0.336083	0.0668428	0.440771	0.0225278	0.0877844	0.262207	2.21336	0.235093	1.84409	-0.0924842	-0.906264	0.272572	2.40165	-0.0871865	-0.437595	0.134041	0.788644	0.16164	1.95257
P11310.EEIIPVAAEYDkTGEYPVPLIR	ACADM	K69k	ACADM.K69k		1.25	0.75		0.75	-0.584963	-0.311533	2	0.667218	2	-0.941712	-0.185411	-0.791026	-0.17328	-0.68244	-0.0121306	-0.027411	-0.0578044	-0.257778	-0.231467	-1.79754	-0.293823	-2.69336	0.0670104	0.574387	-0.0611061	-0.279033	-0.0109995	-0.041341	-0.206924	-1.52166	-0.0225129	-0.138113
P49748.TPVTDPATGAVkEK	ACADVL	K276k	ACADVL.K276k		1	0.75	0.75	1	-0.321928	-0.407821	0.321928	0.407821	0.321928	-0.855968	-0.0143885	-0.109681	-0.0200289	-0.09763	0.00564038	0.0436852	-0.12971	-0.742543	-0.0546294	-0.240763	-0.110465	-0.593336	-0.0289712	-0.199475	-0.264339	-2.27888	0.122397	0.693106	-0.0984442	-0.513966	-0.173761	-2.20452
P49748.ELSGLGSALkNPFGNAGLLLGEAGK	ACADVL	K492k	ACADVL.K492k			0.5		0.5	1.58496	0.740669	1.58496	0.740669	1.58496		-0.0442945	-0.596994	-0.0675417	-0.419312	0.0232472	0.134104	-0.201395	-1.43638	0.296107	2.73019	0.00684145	0.0250385	-0.191969	-2.94435	0.0982502	0.512608	0.129342	0.749404	0.13325	0.781975	-0.0139694	-0.0814945
Q15057.ScMLQADSEkLR	ACAP2	K347k	ACAP2.K347k		0.25	0.5		0.25	0.584963	0.26967	1	0.407821	1		0.0940249	1.08849	0.0722827	0.838313	0.0217423	0.388971	0.193265	1.34614	0.079562	0.383981	0.294809	2.70923	0.043874	0.330117	0.0432445	0.184599	0.0757794	0.365141	-0.020975	-0.0820643	-0.014618	-0.0856078
Q15057.VSEEkENALVK	ACAP2	K134k	ACAP2.K134k		0.75	0.75						NA			-0.0314988	-0.221754	-0.120538	-0.740325	0.0890394	0.569424	0.101969	0.532141	0.297558	2.75373	0.41739	5.15566	-0.0754709	-0.677036	0.20976	1.55516	-0.0672519	-0.314143	0.0568491	0.255508	0.124462	1.28297
NA	ACAP2	K57k	NA		NA	NA	NA	NA	NA	NA	NA	NA	NA		0.225299	1.33686	0.111213	0.750612	0.114086	0.721064	0.137788	0.809646	-0.0390757	-0.162385	0.228239	1.75667	0.0682456	0.588916	0.04315	0.184129	0.119305	0.668674	-0.00999796	-0.0374243	-0.0342163	-0.224474
NA	ACAT1	K223k	NA		NA	NA	NA	NA	NA	NA	NA	NA	NA		0.225299	1.33686	0.111213	0.750612	0.114086	0.721064	0.137788	0.809646	-0.0390757	-0.162385	0.228239	1.75667	0.0682456	0.588916	0.04315	0.184129	0.119305	0.668674	-0.00999796	-0.0374243	-0.0342163	-0.224474
NA	ACAT1	K263k	NA		NA	NA	NA	NA	NA	NA	NA	NA	NA		0.225299	1.33686	0.111213	0.750612	0.114086	0.721064	0.137788	0.809646	-0.0390757	-0.162385	0.228239	1.75667	0.0682456	0.588916	0.04315	0.184129	0.119305	0.668674	-0.00999796	-0.0374243	-0.0342163	-0.224474
P24752.LEDLIVkDGLTDVYNK	ACAT1	K181k	ACAT1.K181k		0.75	0.5			-0.415037	-0.26967		NA		-0.346609	0.129308	0.835172	0.00414792	0.0216159	0.12516	0.845656	0.289485	2.62423	-0.0727091	-0.342397	0.358201	3.85064	0.139759	1.71602	0.14795	0.910257	-0.0600708	-0.273252	-0.0137482	-0.0522506	0.093464	0.834835
NA	ACBD3	K386k	NA		NA	NA	NA	NA	NA	NA	NA	NA	NA		0.0906612	0.887854	-0.0140429	-0.0722612	0.104704	0.63374	0.0233773	0.0914002	-0.26414	-2.24115	-0.136818	-0.801446	0.110943	1.19109	0.0250228	0.09949	-0.171622	-1.1366	-0.00897677	-0.0334624	0.0883524	0.769902
NA	ACBD3	K507k	NA		NA	NA	NA	NA	NA	NA	NA	NA	NA		0.0906612	0.887854	-0.0140429	-0.0722612	0.104704	0.63374	0.0233773	0.0914002	-0.26414	-2.24115	-0.136818	-0.801446	0.110943	1.19109	0.0250228	0.09949	-0.171622	-1.1366	-0.00897677	-0.0334624	0.0883524	0.769902
NA	ACBD3	K381k	NA		NA	NA	NA	NA	NA	NA	NA	NA	NA		0.225299	1.33686	0.111213	0.750612	0.114086	0.721064	0.137788	0.809646	-0.0390757	-0.162385	0.228239	1.75667	0.0682456	0.588916	0.04315	0.184129	0.119305	0.668674	-0.00999796	-0.0374243	-0.0342163	-0.224474
Q5T8D3.MQHLSEGTkGR	ACBD5	K422k	ACBD5.K422k				0.5	0.75		NA	0.415037	0.26967	0.415037	-0.407821	-0.411487	-0.71169	0.00779452	0.00872207	-0.419281	-0.750864	0.225032	1.71656	0.207451	1.50561	0.414502	5.08605	0.00678406	0.0406336	0.0972977	0.505963	0.0831126	0.411156	0.0976641	0.508515	0.00637337	0.0355204
Q5T8D3.VIGPFYEIVEDkK	ACBD5	K151k	ACBD5.K151k		0.5	0.75	2.75	2.75	0.415037	0.136451				-0.177285	0.128911	1.28481	0.155586	0.794359	-0.0266747	-0.026501	-0.314105	-3.03091	0.20333	1.45831	-0.113431	-0.615367	-0.19966	-3.15859	-0.144902	-0.882897	-0.0469008	-0.203025	-0.130023	-0.755036	-0.0440321	-0.305092
Q5T8D3.LQkLETLTALQAK	ACBD5	K469k	ACBD5.K469k		1	1	2.5	1.75		NA	-0.459432	-1.00815	-0.459432	-1.23906	0.0373439	0.340698	-0.0044766	-0.0322097	0.0418205	0.35958	0.371149	4.1151	0.170062	1.10528	0.530111	8.4398	0.0775929	0.703944	0.288534	2.65045	0.00788439	0.0292597	0.234928	1.86988	0.126096	1.30929
Q5T8D3.STEEVkPIDENLGQTGK	ACBD5	K267k	ACBD5.K267k		0.5	0.5	1.75	1.5			-0.192645	-0.171537	-0.192645	-0.249673							-0.248229	-2.01826	-0.22077	-1.66404	-0.461638	-6.30636	-0.0105957	-0.0650421	-0.318157	-3.15113	0.081991	0.403987	-0.129401	-0.749892	-0.179787	-2.33627
Q96QU6.VQQVLAGkSQVAEDPRPSQSQEPSDQR	ACCS	K481k	ACCS.K481k		2	1.5	2.75	2	-0.36257	-0.328714	-0.415037	-1.23906	-0.415037	-0.18612							0.157608	0.978752	0.0686842	0.317576	0.23747	1.85051	0.0339545	0.240478	0.0155464	0.0537968	0.123201	0.576881	-0.00688845	-0.0218288	-0.0440519	-0.269945
Q96AP0.VPGcNQDLDVQkK	ACD	K146k	ACD.K146k		1.25	0.75	0.5	1	-0.584963	-0.683964	0.736966	0.740669	0.736966	-1.55271							0.104004	0.546543	-0.0402361	-0.167952	0.0480351	0.206533	0.0556574	0.448011	0.0223159	0.0877783	0.20029	1.44482	0.00211091	0.00765044	-0.079964	-0.668608
Q96AP0.EALDTSDWEEkEFGFR	ACD	K84k	ACD.K84k		1.75	2.5		1.25	0.459432	1.00815	2.58496	1.81269	2.58496	-0.621125
NA	ACKR1	K337k	NA		NA	NA	NA	NA	NA	NA	NA	NA	NA		0.0906612	0.887854	-0.0140429	-0.0722612	0.104704	0.63374	0.0233773	0.0914002	-0.26414	-2.24115	-0.136818	-0.801446	0.110943	1.19109	0.0250228	0.09949	-0.171622	-1.1366	-0.00897677	-0.0334624	0.0883524	0.769902
NA	ACKR3	K342k	NA		NA	NA	NA	NA	NA	NA	NA	NA	NA		-0.0337347	-0.128115	-0.0803835	-0.30451	0.0466488	0.238078	0.28056	2.48532	0.0681302	0.315559	0.469268	6.52167	0.0819696	0.760942	0.269276	2.35205	0.026475	0.10587	0.245604	2.01308	0.109091	1.04885
NA	ACKR3	K333k	NA		NA	NA	NA	NA	NA	NA	NA	NA	NA		0.110605	0.380192	0.0386982	0.206217	0.0719064	0.361091	-0.0942115	-0.478698	0.116174	0.636054	0.0697791	0.325137	-0.0811808	-0.750519	0.0594089	0.269576	0.0125434	0.0474399	0.163216	1.05338	0.0210567	0.128086
NA	ACKR3	K337k	NA		NA	NA	NA	NA	NA	NA	NA	NA	NA		0.110605	0.380192	0.0386982	0.206217	0.0719064	0.361091	-0.0942115	-0.478698	0.116174	0.636054	0.0697791	0.325137	-0.0811808	-0.750519	0.0594089	0.269576	0.0125434	0.0474399	0.163216	1.05338	0.0210567	0.128086
NA	ACKR3	K328k	NA		NA	NA	NA	NA	NA	NA	NA	NA	NA								0.375848	4.21387	-0.172105	-1.12551	0.368125	4.05231	0.211436	3.50463	0.105126	0.561631	0.0588266	0.266355	0.202872	1.47447	0.0208024	0.126351
NA	ACKR3	K362k	NA		NA	NA	NA	NA	NA	NA	NA	NA	NA								0.311886	2.9928	-0.0990647	-0.511861	0.328113	3.27822	0.158572	2.11532	0.267937	2.33208	-0.154536	-0.970744	0.286328	2.6152	0.189817	2.56544
P53396.LkQGLYR	ACLY	K1080k	ACLY.K1080k		0.75	0.5	0.5	0.75	-0.415037	-0.26967	0.415037	0.171537	0.415037	-0.384418	-0.062837	-0.16736	0.123292	0.409758	-0.186129	-0.499915	-0.0694624	-0.32329	0.282549	2.51588	0.136918	0.802294	-0.135829	-1.63841	-0.268795	-2.34487	-0.0256687	-0.102319	-0.0690006	-0.324383	-0.109237	-1.05097
P53396.EILIPVFkNMADAMR	ACLY	K554k	ACLY.K554k		1.25	1	0.25	1	-0.263034	-0.204865	1.32193	0.748885	1.32193	-0.872978	-0.0245537	-0.075169	0.0920155	0.397435	-0.116569	-0.496709	0.420068	5.22079	0.10833	0.577691	0.530911	8.46758	0.120289	1.35031	0.376082	4.28874	0.099498	0.521367	0.415624	5.19912	0.124269	1.27989
P53396.SGASLkLTLLNPK	ACLY	K265k	ACLY.K265k		0.75	0.25	0.25	0.25	-1	-0.683964				-0.683964	-0.00014072	-0.000421108	0.282899	0.259115	-0.28304	-0.257517	0.0381829	0.158133	-0.156663	-0.977104	-0.0644223	-0.294377	0.0751843	0.673438	-0.0609699	-0.27827	-0.0825968	-0.407853	-0.00719565	-0.0266287	0.00971696	0.0552612
P53396.IGNTGGMLDNILASkLYR	ACLY	K650k	ACLY.K650k		0.5	0.25		0.25	-0.584963	-0.26967	1	0.407821	1	-0.683964	-0.160766	-1.34985	-0.135696	-1.00767	-0.0250696	-0.251813	-0.0933682	-0.473027	-0.296548	-2.73733	-0.24608	-1.98916	0.0784002	0.714306	-0.175148	-1.17246	-0.158589	-1.00892	-0.0100676	-0.0376956	-0.00743974	-0.0417326
P53396.LGQEATVGkATGFLK	ACLY	K97k	ACLY.K97k		3.75	4.5	3.5	3	0.247928	0.276417	-0.206451	-0.260702	-0.206451	0.439123	0.0252685	0.0823977	0.129851	0.326104	-0.104583	-0.201717	-1.04848	-2.2741	-0.805289	-0.895258	-0.434062	-0.463199	0.00687927	0.00168051
P53396.mFSkAFDSGIIPMEFVNK	ACLY	K948k	ACLY.K948k		2	4.25	2	3.25	1	1.36105	0.63743	0.93412	0.63743	-1.52259	0.0392709	0.147356	0.0935309	0.332592	-0.05426	-0.198994	0.00075042	0.00267912	0.100231	0.519962	0.0697125	0.324748	-0.038386	-0.279664	0.0487864	0.212707	-0.138	-0.822414	-0.0804149	-0.393993	0.0839231	0.715608
P53396.DYQGPLkEHEVTIFVR	ACLY	K369k	ACLY.K369k		1.5	1.5	1.5	1.25			-0.222392	-0.136451	-0.222392	-0.136451	0.348744	0.980926	0.348075	0.722978	0.000668385	0.019226	0.116386	0.63766	0.0212943	0.0825747	0.161583	1.02325	0.0366926	0.264653	0.072506	0.345248	-0.0792976	-0.386965	-0.145994	-0.89265	0.0682054	0.537355
P53396.ADQkGVTIIGPATVGGIKPGcFK	ACLY	K616k	ACLY.K616k		0.5	1		0.25	0.736966	0.320564	1	0.407821	1	-0.14814	0.000566633	0.00241168	-0.00983349	-0.070416	0.0104001	0.0443484	0.257644	2.14855	0.262112	2.212	0.566565	9.78389	-0.00172387	-0.00999004	0.157077	0.994587	0.169578	1.11608	0.265021	2.2889	-0.00561713	-0.0311621
P53396.kPASFmTSIcDER	ACLY	K836k	ACLY.K836k		5.5	7.25	4.25	5.5	0.383329	0.801606	0.353637	1.11702	0.353637	-0.293968	-0.00543432	-0.0491601	-0.00965894	-0.10667	0.00422462	0.0661822	-0.234606	-1.8378	-0.173221	-1.13664	-0.401485	-4.78014	-0.0236866	-0.157889	-0.375356	-4.27309	-0.0204705	-0.0799292	-0.218005	-1.65479	-0.15945	-1.90888
P53396.ADEVAPAkK	ACLY	K468k	ACLY.K468k		0.75	2	0.5	0.5	1.16993	0.682847				0.98774	0.107896	0.810043	0.0786654	0.444188	0.0292306	0.140099	-0.166903	-1.07435	-0.033512	-0.136313	-0.288932	-2.6155	-0.0514709	-0.404605	-0.0619633	-0.283848	0.246715	2.02833	0.0168383	0.064797	-0.138689	-1.52145
P53396.SLQGkSTTLFSR	ACLY	K488k	ACLY.K488k		2.25	2.5	2.5	1.5	0.137504	0.171537	-0.652077	-1.30255	-0.652077	1.65419	-0.000565616	-0.00360535	-0.0404869	-0.159587	0.0399213	0.191634	0.0824546	0.40205	0.0642595	0.293458	0.0694314	0.323109	0.00702087	0.0421165	-0.150481	-0.933275	0.213149	1.5957	-0.100616	-0.529267	-0.163379	-1.98766
P53396.AFDSGIIPMEFVNKMk	ACLY	K964k	ACLY.K964k		0.75	0.25			-1	-0.683964		NA		-0.855968	-0.0794077	-0.470431	-0.160038	-0.934315	0.0806307	0.397487	0.0776486	0.372197	0.239187	1.89742	0.378972	4.28038	-0.0623321	-0.520756	0.190597	1.33631	-0.103629	-0.550801	-0.0279472	-0.112409	0.132196	1.40996
P53396.LNPEDIkK	ACLY	K166k	ACLY.K166k		0.5		0.25	0.25	-1.58496	-0.740669				-0.855968	-0.0794077	-0.470431	-0.160038	-0.934315	0.0806307	0.397487	0.0776486	0.372197	0.239187	1.89742	0.378972	4.28038	-0.0623321	-0.520756	0.190597	1.33631	-0.103629	-0.550801	-0.0279472	-0.112409	0.132196	1.40996
P53396.IGNTGGmLDNILASkLYRPGSVAYVSR	ACLY	K650k	ACLY.K650k		0.75	1.5	0.5	0.25	0.807355	0.623013	-0.584963	-0.26967	-0.584963	1.39347	-0.116706	-1.19471	-0.152558	-0.854488	0.0358527	0.439688	0.0261746	0.103468	0.0223001	0.0868191	0.141337	0.839985	0.00149503	0.00865086	0.190601	1.33636	0.00498333	0.0182753	0.0107635	0.0404156	0.0833983	0.709295
P53396.VDATADYIcKVk	ACLY	K232k	ACLY.K232k		0.75	2	2	1.25	1.16993	1.32006	-0.584963	-0.748885	-0.584963	2.05668	-0.0291206	-0.107797	-0.103289	-1.53985	0.0741682	0.499463	0.116236	0.636523	0.00938381	0.0346979	0.0992714	0.513293	0.0412307	0.30547	0.0648818	0.300441	0.0678979	0.317913	0.0187416	0.0726741	-0.00135511	-0.00732421
P53396.LTLLNPkGR	ACLY	K272k	ACLY.K272k		1	2	1.75	2	0.847997	1.88194	0.169925	0.195439	0.169925		0.216956	1.44919	0.156544	1.03341	0.0604117	0.546388	0.0850922	0.418795	0.350142	3.69164	0.337948	3.45902	-0.102274	-1.0525	-0.0796866	-0.389407	0.309587	3.00093	0.183361	1.25819	-0.174901	-2.22911
P53396.DEPSVAAMVYPFTGDHKQk	ACLY	K540k	ACLY.K540k		0.25	0.75	0.25	1	1	0.683964	1.32193	0.748885	1.32193	-0.204865	-0.00812859	-0.0486623	-0.118688	-0.782017	0.11056	0.809613	0.18049	1.21052	0.133384	0.772727	0.38785	4.47312	0.0181765	0.117074	-0.0633182	-0.291513	0.143342	0.869046	0.0854102	0.425989	-0.0928525	-0.826937
P53396.ELLYkFIcTTSAIQNR	ACLY	K17k	ACLY.K17k		2.5	3.25	3.5	2.75	0.347923	1.00815	-0.321928	-0.623013	-0.321928	1.36094	0.177465	2.14346	0.101131	0.767031	0.0763332	0.953711	0.22117	1.66893	-0.0383547	-0.158949	0.274931	2.39996	0.100142	1.01974	-0.11239	-0.615461	-0.23583	-1.88175	-0.0425325	-0.181064	0.0554614	0.408777
P53396.LLVGVDEkLNPEDIKK	ACLY	K159k	ACLY.K159k		2	1.5	1.5	1.5	-0.36257	-0.740669				-0.574189	0.094071	1.17871	-0.138152	-1.47588	0.232223	2.27203	0.203388	1.45898	0.09763	0.501963	0.264479	2.24605	0.0408085	0.301593	0.374737	4.25977	0.0608967	0.277861	0.483809	7.06636	0.141008	1.56238
P53396.VkSINNPDMR	ACLY	K978k	ACLY.K978k		2	2.75	1.5	0.75	0.415037	0.295486	-0.807355	-0.623013	-0.807355	0.65087							-0.194382	-1.35836	-0.0473892	-0.20326	-0.265252	-2.25723	-0.0567195	-0.459293	0.0531795	0.235745	-0.0329553	-0.135184	-0.0653376	-0.30306	0.0387004	0.260356
P53396.NQALkEAGVFVPR	ACLY	K780k	ACLY.K780k		2.75	4.75	4.25	3	0.736966	1.13387	-0.469485	-0.828784	-0.469485	2.27482							-0.140271	-0.830821	0.102759	0.537714	0.0447064	0.189816	-0.0937773	-0.924969	-0.234162	-1.62494	0.232976	1.41342	-0.0943722	-0.372413	-0.214091	-2.51998
P53396.AISEQTGkELLYK	ACLY	K12k	ACLY.K12k		2	2.5	2.5	1.75	0.289507	0.740669	-0.459432	-1.00815	-0.459432	1.75778							-0.0016675	-0.0059756	-0.17931	-1.19836	-0.139484	-0.824083	0.0685462	0.592476	-0.225598	-1.74951	-0.0850101	-0.423392	-0.323142	-3.24057	-0.0631661	-0.484842
P53396.VQILkDYVR	ACLY	K991k	ACLY.K991k		2.5	3.25	3.5	3	0.347923	0.623013	-0.206451	-0.443709	-0.206451	1.0208							0.160865	1.01646	0.0749778	0.355974	0.346062	3.61276	0.0331409	0.234012	0.293468	2.73026	-0.0675152	-0.315678	0.136889	0.812868	0.16219	1.96363
P53396.AQkLLVGVDEK	ACLY	K151k	ACLY.K151k		1.75	2.25	1.75	1.5	0.321928	0.683964	-0.192645	-0.136451	-0.192645	0.611516							-0.181572	-1.22171	-0.228887	-1.76483	-0.375745	-4.21168	0.0182575	0.117655	-0.0350717	-0.145058	-0.186386	-1.29055	-0.0555765	-0.2486	0.0679854	0.535016
P53396.GVTIIGPATVGGIkPGcFK	ACLY	K630k	ACLY.K630k		3.75	4.5	4.75	4.25	0.247928	0.409386	-0.152003	-0.683964	-0.152003	0.831308							-0.162767	-1.03452	-0.185114	-1.25875	-0.325578	-3.23258	0.00862321	0.0522668	-0.106061	-0.568439	-0.212163	-1.58385	-0.128449	-0.742052	0.0476718	0.336946
P53396.FGGALDAAAkMFSK	ACLY	K944k	ACLY.K944k		1.5	1	1.75	4	-0.485427	-0.443709	1.08746	2.26664	1.08746	-2.50636							-0.0993048	-0.513525	-0.0848877	-0.417488	-0.149891	-0.915283	-0.00556308	-0.0330575	-0.00722404	-0.0267369	-0.11922	-0.668008	-0.0931905	-0.477716	0.0503196	0.360799
NA	ACLY	K4k	NA		NA	NA	NA	NA	NA	NA	NA	NA	NA								0.311886	2.9928	-0.0990647	-0.511861	0.328113	3.27822	0.158572	2.11532	0.267937	2.33208	-0.154536	-0.970744	0.286328	2.6152	0.189817	2.56544
P21399.IDFEKEPLGVNAkGQQVFLK	ACO1	K580k	ACO1.K580k		1	0.5		0.75	-0.736966	-0.443709	2	1.23906	2	-1.75778	0.0320292	0.311108	0.0981162	0.584926	-0.066087	-0.32266
P21399.EVYQkIETVNESWNALATPSDK	ACO1	K615k	ACO1.K615k		1	0.25	0.25	1.25	-1.32193	-1.23906	1.58496	0.888034	1.58496	-1.57661	-0.187226	-0.0563778	0.52365	0.356559	-0.710876	-0.178633	-0.110682	-0.594936	0.0544368	0.239742	-0.119207	-0.659272	-0.0637137	-0.536366	-0.130187	-0.671371	0.0984785	0.496622	-0.0394599	-0.154852	-0.100978	-0.869365
P21399.DFEScLGAkQGFK	ACO1	K396k	ACO1.K396k		1	0.5	0.25	0.5	-0.736966	-0.740669	0.584963	0.26967	0.584963	-0.936141	0.0310007	0.189316	-0.016505	-0.0728401	0.0475057	0.216441	0.0159153	0.0604115	0.00976532	0.0361642	0.0969387	0.497223	0.00237306	0.0138109	0.0932939	0.478419	0.18826	1.31082	0.06647	0.3096	-0.0426685	-0.293434
P21399.YTIIIPENLkPQMK	ACO1	K844k	ACO1.K844k		0.75	0.75	0.5	0.5							0.285573	0.313458	-0.0532877	-0.0513292	0.338861	0.403391	-0.23751	-1.87548	-0.0606049	-0.273078	-0.314524	-3.03813	-0.0682618	-0.589108	-0.307238	-2.96053	-0.0346751	-0.143196	-0.200788	-1.45051	-0.122463	-1.25116
P21399.FFNLNkLEDSR	ACO1	K26k	ACO1.K26k		1.75	2.5	2.5	2	0.459432	1.00815	-0.289507	-0.740669	-0.289507	1.64371	0.169115	1.57505	0.0650291	0.623397	0.104086	0.802893	-0.22643	-1.73398	-0.0811778	-0.394036	-0.389561	-4.51092	-0.056048	-0.452147	0.0801857	0.392548	0.00630897	0.0232629	-0.0738289	-0.35324	0.0331929	0.216505
P21399.LFFWNSKSTYIk	ACO1	K644k	ACO1.K644k		1	0.5	0.25		-0.736966	-0.443709	-1	-0.407821	-1	-0.346609	0.0250747	0.0792788	-0.172215	-0.760623	0.19729	0.852775	0.0496736	0.214899	-0.0163738	-0.0622656	0.135696	0.79201	0.0254854	0.171773	0.0518688	0.228801	0.102039	0.539394	0.0317041	0.129416	-0.0225417	-0.138312
P21399.RADSLQkNQDLEFER	ACO1	K141k	ACO1.K141k		1.75	2.25	2.75	2	0.321928	0.683964	-0.415037	-1.23906	-0.415037	1.81269							-0.238731	-1.89145	-0.307415	-2.91692	-0.480803	-6.85722	0.0265027	0.179749	-0.267105	-2.31971	-0.150136	-0.93012	-0.368607	-4.12936	-0.0525545	-0.381382
P21399.ADSLQkNQDLEFER	ACO1	K141k	ACO1.K141k		1.25	2	1.5	2	0.584963	0.748885	0.36257	0.740669	0.36257	-0.233898							-0.0490396	-0.211651	0.259752	2.17835	0.109519	0.586381	-0.119152	-1.33038	0.0675987	0.316165	-0.051393	-0.226295	-0.0607694	-0.277148	0.0534631	0.389869
Q99798.SAAVAkQALAHGLK	ACO2	K401k	ACO2.K401k		0.5	0.25	0.25	0.5	-0.584963	-0.26967	0.584963	0.26967	0.584963	-0.621125	-0.00708866	-0.0307315	-0.0244304	-0.103037	0.0173417	0.0579273	0.194533	1.36001	0.010817	0.040229	0.144361	0.86625	0.0708896	0.620539	0.0510769	0.224635	0.035293	0.146098	0.00218429	0.00791876	0.00709174	0.0396967
Q99798.kQGLLPLTFADPADYNK	ACO2	K701k	ACO2.K701k		0.5	0.75			0.415037	0.26967		NA		-0.407821	0.268057	0.943888	0.174695	1.07548	0.093362	0.242612	-0.140312	-0.802587	0.0268294	0.102971	-0.180009	-1.1654	-0.0621285	-0.51404	0.170393	1.12424	0.249262	2.06351	0.387272	4.53468	-0.0354356	-0.234075
Q99798.FNPETDYLTGTDGKk	ACO2	K521k	ACO2.K521k		2	2	2	1.25			-0.584963	-1.23906	-0.584963	0.748885															0.200204	0.352021	-0.176292	-0.296412	-0.437223	-0.657685	0.186879	0.511338
Q99798.AkDINQEVYNFLATAGAK	ACO2	K144k	ACO2.K144k		0.5	1.5		1	1.22239	0.64267	2.32193	1.03753	2.32193								-0.0556366	-0.246123	-0.100499	-0.521836	-0.275698	-2.41149	0.017311	0.110894	0.0152285	0.0582234	-0.0514569	-0.226631	0.128566	0.743013	0.0299618	0.191874
Q86TX2.DEkGALFQAHAR	ACOT1	K42k	ACOT1.K42k		1	1	0.25	1.25			1.58496	1.52259	1.58496	-1.03938	-0.16117	-0.519456	-0.0301078	-0.129241	-0.131062	-0.43308	0.203144	1.43801	0.0764782	0.362179	0.344039	3.41266	0.0486467	0.372766	0.475869	4.26709	0.154528	0.538185	0.365902	2.55775	0.22733	1.67262
Q86TX2.VTkDGYADIVDVLNSPLEGPDQK	ACOT1	K286k	ACOT1.K286k		3.25	3.5	2.75	2.75	0.0995357	0.170176				-0.136451	0.00930712	0.0148243	-0.149503	-0.26879	0.15881	0.361467	0.165677	1.06247	0.119789	0.663764	0.299769	2.78985	0.0177068	0.113712	0.242304	1.96819	0.149572	0.924977	0.101668	0.536745	0.0416646	0.284947
Q86TX2.SEFYANEAckR	ACOT1	K340k	ACOT1.K340k		2.25	2.5	2	2	0.137504	0.26967				-0.346609	0.129308	0.835172	0.00414792	0.0216159	0.12516	0.845656	0.289485	2.62423	-0.0727091	-0.342397	0.358201	3.85064	0.139759	1.71602	0.14795	0.910257	-0.0600708	-0.273252	-0.0137482	-0.0522506	0.093464	0.834835
Q9NPJ3.TLAFTSVDLTNkATGK	ACOT13	K123k	ACOT13.K123k		1.25	2	1.5	2	0.584963	0.748885	0.36257	0.740669	0.36257	-0.233898							-0.0490396	-0.211651	0.259752	2.17835	0.109519	0.586381	-0.119152	-1.33038	0.0675987	0.316165	-0.051393	-0.226295	-0.0607694	-0.277148	0.0534631	0.389869
NA	ACOT13	K13k	NA		NA	NA	NA	NA	NA	NA	NA	NA	NA								0.311886	2.9928	-0.0990647	-0.511861	0.328113	3.27822	0.158572	2.11532	0.267937	2.33208	-0.154536	-0.970744	0.286328	2.6152	0.189817	2.56544
O00154.YEAQkLER	ACOT7	K198k	ACOT7.K198k		1	0.75	1.75	1.75	-0.321928	-0.407821				-0.295831	0.114162	0.147862	0.301909	0.497447	-0.187747	-0.253466	0.176665	1.17135	0.133816	0.776317	0.326624	3.25137	0.016534	0.1054	0.229266	1.79632	0.0915383	0.466537	0.374239	4.24909	0.0618813	0.471806
O00154.ATLWYVPLSLkNVDK	ACOT7	K168k	ACOT7.K168k		2	2.25	1.75	1.5	0.152003	0.407821	-0.192645	-0.171537	-0.192645	-0.621125	-0.0229167	-0.0529197	-0.0403209	-0.199662	0.0174042	0.0906651	0.149599	0.912661	0.107048	0.568382	0.337518	3.451	0.016419	0.10459	0.340093	3.55625	0.095617	0.494325	0.25731	2.17696	0.109843	1.05976
Q9Y305.IAFSSTSLLkMAPSAEER	ACOT9	K250k	ACOT9.K250k		1	1.5	0.75	1	0.485427	0.443709	0.321928	0.195439	0.321928	-0.346609	-0.00710138	-0.059959	-0.0529287	-0.632757	0.0458273	0.500384	0.251379	2.06133	0.223445	1.6969	0.535666	8.63435	0.0107789	0.066244	0.142426	0.860968	0.164665	1.0675	0.325924	3.29114	-0.00999199	-0.0569195
Q9Y305.LkSLEIcHPQER	ACOT9	K294k	ACOT9.K294k		0.75		1.5	1	-2	-1.23906	-0.485427	-0.320564	-0.485427	-0.158485	0.245273	0.423655	-0.0235608	-0.0495121	0.268834	0.711363	-0.0878148	-0.436352	-0.0935999	-0.474582	-0.270109	-2.32822	0.00223229	0.0129796	-0.0815941	-0.401461	-0.039183	-0.164667	-0.0266111	-0.106472	-0.0190553	-0.11456
Q9Y305.VLPSNAVWMENSkLK	ACOT9	K292k	ACOT9.K292k		0.5	0.5	0.25				-1	-0.407821	-1	-0.346609	0.0250747	0.0792788	-0.172215	-0.760623	0.19729	0.852775	0.0496736	0.214899	-0.0163738	-0.0622656	0.135696	0.79201	0.0254854	0.171773	0.0518688	0.228801	0.102039	0.539394	0.0317041	0.129416	-0.0225417	-0.138312
NA	ACOX1	K89k	NA		NA	NA	NA	NA	NA	NA	NA	NA	NA		-0.0681529	-0.140401	0.119401	0.201868	-0.187554	-0.403897	0.270147	2.32879	0.0579446	0.258538	0.444333	5.83696	0.0818819	0.759779	0.335529	3.46947	-0.068348	-0.320548	0.10979	0.595952	0.181462	2.37369
Q99424.LFQWAQkSPTNTQENPAYEEYIR	ACOX2	K655k	ACOX2.K655k		0.75	0.25		0.25	-1	-0.396592	1	0.407821	1	-1.10712	0.00398303	0.0320271	-0.145025	-1.02862	0.149008	1.07039	0.212464	1.56424	0.147168	0.890983	0.440701	5.74168	0.0251953	0.169515	0.235567	1.87829	0.194541	1.37993	0.299482	2.82946	0.0184328	0.110412
O15254.SPLkSVDFLDAYPGILDQK	ACOX3	K484k	ACOX3.K484k		2	1.5	0.75	0.5	-0.36257	-0.740669	-0.415037	-0.136451	-0.415037	-0.165091	-0.131119	-1.25675	-0.0454225	-0.182916	-0.085696	-0.416912	0.113541	0.61619	0.269237	2.31538	0.434112	5.5716	-0.0600777	-0.495694	0.201393	1.45744	-0.154545	-0.970826	-0.0168988	-0.0650456	0.159923	1.91827
O15254.MGDVTPEGTYVSPFkDVR	ACOX3	K291k	ACOX3.K291k		1.5	1.5	0.5	0.25			-0.584963	-0.26967	-0.584963	0.170176	-0.0251365	-0.140878	-0.0750638	-0.615278	0.0499273	0.239462	-0.0784207	-0.376936	0.00830403	0.0305717	-0.158334	-0.992661	-0.0334641	-0.236754	0.231315	1.82274	0.115179	0.636693	0.0894375	0.452475	0.0521796	0.377901
NA	ACP1	K108k	NA		NA	NA	NA	NA	NA	NA	NA	NA	NA		-0.0681529	-0.140401	0.119401	0.201868	-0.187554	-0.403897	0.270147	2.32879	0.0579446	0.258538	0.444333	5.83696	0.0818819	0.759779	0.335529	3.46947	-0.068348	-0.320548	0.10979	0.595952	0.181462	2.37369
NA	ACSF2	K231k	NA		NA	NA	NA	NA	NA	NA	NA	NA	NA		-0.0681529	-0.140401	0.119401	0.201868	-0.187554	-0.403897	0.270147	2.32879	0.0579446	0.258538	0.444333	5.83696	0.0818819	0.759779	0.335529	3.46947	-0.068348	-0.320548	0.10979	0.595952	0.181462	2.37369
P33121.kPDQPYEWLSYK	ACSL1	K113k	ACSL1.K113k		1.25	1	0.25	1.5	-0.263034	-0.204865	1.80735	1.75778	1.80735	-1.56321	0.0522815	0.388151	0.0968289	0.861315	-0.0445474	-0.473148	-0.00237542	-0.00853716	-0.172254	-1.127	-0.137349	-0.805933	0.0655504	0.557414	0.0465601	0.201288	-0.0702681	-0.331876	-0.119788	-0.67247	0.052491	0.380791
NA	ACSL1	K356k	NA		NA	NA	NA	NA	NA	NA	NA	NA	NA		-0.0681529	-0.140401	0.119401	0.201868	-0.187554	-0.403897	0.270147	2.32879	0.0579446	0.258538	0.444333	5.83696	0.0818819	0.759779	0.335529	3.46947	-0.068348	-0.320548	0.10979	0.595952	0.181462	2.37369
NA	ACSL1	K551k	NA		NA	NA	NA	NA	NA	NA	NA	NA	NA		-0.0681529	-0.140401	0.119401	0.201868	-0.187554	-0.403897	0.270147	2.32879	0.0579446	0.258538	0.444333	5.83696	0.0818819	0.759779	0.335529	3.46947	-0.068348	-0.320548	0.10979	0.595952	0.181462	2.37369
P33121.LLLEGVENkLIPGLK	ACSL1	K216k	ACSL1.K216k		1	0.25		0.25	-1.32193	-1.23906	1	0.407821	1	-1.52259	0.0531809	0.376712	0.0307084	0.212033	0.0224725	0.150242	0.266138	2.27008	0.122158	0.682213	0.39152	4.55444	0.0555572	0.446951	0.258134	2.18877	-0.149918	-0.928133	0.149817	0.927206	0.183338	2.41599
P33121.IFGQANTTLkR	ACSL1	K386k	ACSL1.K386k		1	1	0.5	0.75			0.415037	0.26967	0.415037	-0.204865	-0.061306	-0.310609	-0.109696	-0.515306	0.04839	0.169298	-0.156806	-0.978429	-0.0808528	-0.392005	-0.228828	-1.76409	-0.0293076	-0.202204	-0.130709	-0.760728	-0.17479	-1.1688	-0.192701	-1.35948	0.0198056	0.119597
P33121.GPNVFQGYLkDPAK	ACSL1	K521k	ACSL1.K521k		0.25	0.25	0.5	0.25			-0.584963	-0.170176	-0.584963	-0.295831							0.00268752	0.00967113	0.225277	1.7196	0.205227	1.47998	-0.0858897	-0.813723	-0.297466	-2.79598	-0.0596448	-0.270885	-0.104253	-0.555302	-0.106853	-1.01675
P33121.LIFHkVQSSLGGR	ACSL1	K419k	ACSL1.K419k		0.5	0.5		0.25			1	0.407821	1	-0.26967							0.0376293	0.155509	-0.0440871	-0.186747	-0.019351	-0.0744635	0.0315316	0.2205	-0.153088	-0.957283	0.139774	0.837768	-0.053287	-0.236317	-0.131583	-1.39967
O95573.VGAPLVccEIkLK	ACSL3	K507k	ACSL3.K507k		1	0.5	1.75	1.5	-0.736966	-0.740669	-0.192645	-0.26967	-0.192645	-0.249673	-0.00737336	-0.0116296	0.251629	1.31339	-0.259002	-1.51558
O95573.AKPVNSkPDSAYR	ACSL3	K63k	ACSL3.K63k		0.5		0.25	0.5	-1.58496	-0.407821	0.584963	0.26967	0.584963	-1.09415	-0.313052	-2.01697	-0.232938	-1.97835	-0.0801138	-0.606486	-0.205699	-1.48541	-0.226842	-1.73913	-0.427168	-5.39618	0.00815836	0.0493013	-0.26916	-2.35032	0.0935377	0.480078	-0.110304	-0.599788	-0.16296	-1.97918
NA	ACSL3	K13k	NA		NA	NA	NA	NA	NA	NA	NA	NA	NA		-0.0681529	-0.140401	0.119401	0.201868	-0.187554	-0.403897	0.270147	2.32879	0.0579446	0.258538	0.444333	5.83696	0.0818819	0.759779	0.335529	3.46947	-0.068348	-0.320548	0.10979	0.595952	0.181462	2.37369
NA	ACSL3	K96k	NA		NA	NA	NA	NA	NA	NA	NA	NA	NA		-0.0681529	-0.140401	0.119401	0.201868	-0.187554	-0.403897	0.270147	2.32879	0.0579446	0.258538	0.444333	5.83696	0.0818819	0.759779	0.335529	3.46947	-0.068348	-0.320548	0.10979	0.595952	0.181462	2.37369
O95573.IGYSSPQTLADQSSkIK	ACSL3	K363k	ACSL3.K363k		1.75	1.5	0.75	1.5	-0.192645	-0.26967	0.807355	0.623013	0.807355	-1.30255	-0.0114354	-0.0425573	0.0616156	0.215845	-0.0730511	-0.361987	-0.312172	-2.9977	-0.146694	-0.886783	-0.52667	-8.32102	-0.0638523	-0.537942	-0.0941214	-0.48406	-0.130889	-0.762222	-0.288854	-2.65557	0.0165197	0.0978425
O95573.NVMNkVSEmSSFQR	ACSL3	K397k	ACSL3.K397k		2.75	3.25	1.75	3	0.222392	0.201834	0.70044	0.597791	0.70044	-0.373693	0.0811541	0.413133	0.119043	1.41409	-0.0378894	-0.331344	0.0984692	0.507743	0.247718	2.01131	0.253017	2.08394	-0.0575901	-0.468623	0.134745	0.794596	-0.105345	-0.563224	0.0355888	0.147493	0.107872	1.03131
O95573.EVLNEEDEVQPnGkIFK	ACSL3	K122k	ACSL3.K122k		0.5		0.5	0.25	-1.58496	-0.740669	-0.584963	-0.170176	-0.584963	-0.407821	-0.104181	-0.407707	-0.112124	-0.203997	0.00794301	0.0106314	-0.245751	-1.98473	0.0683092	0.316594	-0.138213	-0.813256	-0.121185	-1.36612	-0.133421	-0.783408	0.0663135	0.308694	-0.0553175	-0.247201	-0.0897407	-0.787294
NA	ACSL3	K642k	NA		NA	NA	NA	NA	NA	NA	NA	NA	NA		0.336503	0.519102	0.215785	0.940933	0.120718	0.0937297	0.39109	4.54485	-0.0467775	-0.200173	0.386613	4.44594	0.168958	2.35613	0.167928	1.09964	0.198847	1.42837	0.0433787	0.185267	-0.0138919	-0.0810048
O95573.GDTSMLkPTLmAAVPEIMDR	ACSL3	K376k	ACSL3.K376k		1.75	0.25	0.5	0.25	-2	-2.26568	-0.584963	-0.170176	-0.584963	-1.91062	-0.132679	-1.16002	-0.16431	-1.27596	0.0316313	0.352111	-0.0279935	-0.111449	0.210901	1.54583	0.116377	0.637595	-0.0921812	-0.901908	0.00100158	0.00361338	-0.0270388	-0.108366	0.0413721	0.17534	0.0125986	0.0728987
O95573.TkADFFEDEnGQR	ACSL3	K547k	ACSL3.K547k		1.5	2	4.25	2.5	0.36257	0.202432	-0.710493	-2.40257	-0.710493	2.2747	0.12497	1.22352	0.0375576	0.231481	0.0874124	0.706406	-0.0533066	-0.233777	-0.0333392	-0.135519	-0.0654869	-0.300409	-0.00770475	-0.0464239	-0.0876789	-0.440833	-0.0182186	-0.070498	-0.000729835	-0.00263006	-0.0312085	-0.201283
O95573.FEIPVkIR	ACSL3	K679k	ACSL3.K679k		0.25	0.25	0.25	0.5			0.584963	0.26967	0.584963	-0.26967							-0.20646	-1.49416	-0.0207382	-0.0802414	-0.346172	-3.61487	-0.0716635	-0.629931	0.147797	0.908874	-0.105996	-0.567965	-0.0578462	-0.26096	0.114029	1.12147
O60488.GDcTVLkPTLmAAVPEIMDR	ACSL4	K367k	ACSL4.K367k		0.5	1			0.736966	0.443709		NA		-0.511353	0.231958	0.532944	0.612568	1.3356	-0.38061	-0.897498	-0.0548264	-0.241808	-0.19393	-1.35342	-0.133706	-0.775403	0.0536755	0.42725	-0.366861	-4.09271	0.000707944	0.00255094	-0.0942847	-0.485177	-0.165149	-2.02374
NA	ACSL4	K89k	NA		NA	NA	NA	NA	NA	NA	NA	NA	NA		0.0789428	0.350662	0.0612296	0.272655	0.0177131	0.023501	0.270453	2.3333	0.0467591	0.20008	0.460675	6.27956	0.0863159	0.819561	0.242032	1.96452	-0.0106961	-0.0401513	0.21141	1.57483	0.113551	1.11433
NA	ACSL4	K360k	NA		NA	NA	NA	NA	NA	NA	NA	NA	NA		0.0789428	0.350662	0.0612296	0.272655	0.0177131	0.023501	0.270453	2.3333	0.0467591	0.20008	0.460675	6.27956	0.0863159	0.819561	0.242032	1.96452	-0.0106961	-0.0401513	0.21141	1.57483	0.113551	1.11433
NA	ACSL4	K498k	NA		NA	NA	NA	NA	NA	NA	NA	NA	NA		0.0789428	0.350662	0.0612296	0.272655	0.0177131	0.023501	0.270453	2.3333	0.0467591	0.20008	0.460675	6.27956	0.0863159	0.819561	0.242032	1.96452	-0.0106961	-0.0401513	0.21141	1.57483	0.113551	1.11433
NA	ACSL4	K500k	NA		NA	NA	NA	NA	NA	NA	NA	NA	NA		0.146489	0.589762	0.0757723	0.390069	0.0707165	0.213574	0.254497	2.10448	0.0677055	0.313108	0.409787	4.97376	0.0720766	0.634969	0.201457	1.45818	0.044732	0.19204	0.000253269	0.000910895	0.0704166	0.561097
NA	ACSL4	K621k	NA		NA	NA	NA	NA	NA	NA	NA	NA	NA		0.146489	0.589762	0.0757723	0.390069	0.0707165	0.213574	0.254497	2.10448	0.0677055	0.313108	0.409787	4.97376	0.0720766	0.634969	0.201457	1.45818	0.044732	0.19204	0.000253269	0.000910895	0.0704166	0.561097
NA	ACSL4	K661k	NA		NA	NA	NA	NA	NA	NA	NA	NA	NA		0.146489	0.589762	0.0757723	0.390069	0.0707165	0.213574	0.254497	2.10448	0.0677055	0.313108	0.409787	4.97376	0.0720766	0.634969	0.201457	1.45818	0.044732	0.19204	0.000253269	0.000910895	0.0704166	0.561097
NA	ACSL4	K670k	NA		NA	NA	NA	NA	NA	NA	NA	NA	NA		0.146489	0.589762	0.0757723	0.390069	0.0707165	0.213574	0.254497	2.10448	0.0677055	0.313108	0.409787	4.97376	0.0720766	0.634969	0.201457	1.45818	0.044732	0.19204	0.000253269	0.000910895	0.0704166	0.561097
NA	ACSL4	K690k	NA		NA	NA	NA	NA	NA	NA	NA	NA	NA		0.146489	0.589762	0.0757723	0.390069	0.0707165	0.213574	0.254497	2.10448	0.0677055	0.313108	0.409787	4.97376	0.0720766	0.634969	0.201457	1.45818	0.044732	0.19204	0.000253269	0.000910895	0.0704166	0.561097
O60488.VEAALkNcPLIDNIcAFAK	ACSL4	K593k	ACSL4.K593k		1	1		0.25			1	0.407821	1	-0.407821	0.19408	1.74105	0.149154	1.75528	0.0449259	0.364587	-0.102937	-0.538972	-0.183094	-1.23756	-0.351186	-3.712	0.0309297	0.215506	0.0230136	0.0907743	-0.133813	-0.786714	-0.102966	-0.546026	0.0704622	0.561591
O60488.VNNFGSGLTALGLkPK	ACSL4	K148k	ACSL4.K148k		0.5	1	0.25	0.75	0.736966	0.740669	1	0.396592	1		0.0940249	1.08849	0.0722827	0.838313	0.0217423	0.388971	0.193265	1.34614	0.079562	0.383981	0.294809	2.70923	0.043874	0.330117	0.0432445	0.184599	0.0757794	0.365141	-0.020975	-0.0820643	-0.014618	-0.0856078
O60488.NEEkTAEDYSVDENGqR	ACSL4	K536k	ACSL4.K536k		0.75	2.5	0.25	0.75	1.45943	2.40257	1	0.683964	1	-1.75778	0.0117962	0.0481207	-0.0550466	-0.336083	0.0668428	0.440771	0.0225278	0.0877844	0.262207	2.21336	0.235093	1.84409	-0.0924842	-0.906264	0.272572	2.40165	-0.0871865	-0.437595	0.134041	0.788644	0.16164	1.95257
O60488.NVMSkVQEMNYIQK	ACSL4	K388k	ACSL4.K388k		1	0.5	1.5	0.75	-0.736966	-0.443709	-0.807355	-0.623013	-0.807355	-0.171537							-0.0452946	-0.192742	-0.106058	-0.561241	-0.293481	-2.68787	0.0234465	0.156057	-0.032122	-0.131337	-0.0474399	-0.20578	-0.0384894	-0.161319	0.00688238	0.0384759
O60488.IGYSSPLTLSDQSSKIk	ACSL4	K356k	ACSL4.K356k		1.75	2.25	3	2.75	0.321928	0.683964	-0.115477	-0.195439	-0.115477	-0.639402							0.165011	1.05604	-0.227849	-1.75175	-0.0352146	-0.144184	0.151591	1.96172	-0.0397264	-0.167301	0.132516	0.775806	0.21226	1.58502	-0.0773886	-0.6388
O60488.LQAGEYVSLGkVEAALK	ACSL4	K587k	ACSL4.K587k		0.5	0.75	0.25	0.5	0.415037	0.26967	0.584963	0.26967	0.584963								-0.152169	-0.935859	-0.213901	-1.58127	-0.382833	-4.36353	0.0238205	0.158913	0.113758	0.625836	-0.136125	-0.806338	-0.083998	-0.416848	0.112273	1.09536
O60488.kGYDAPLcNLLLFK	ACSL4	K413k	ACSL4.K413k		0.5	0.5		0.25			1	0.407821	1	-0.26967							0.0376293	0.155509	-0.0440871	-0.186747	-0.019351	-0.0744635	0.0315316	0.2205	-0.153088	-0.957283	0.139774	0.837768	-0.053287	-0.236317	-0.131583	-1.39967
O60488.VQEMNYIQkTLFK	ACSL4	K397k	ACSL4.K397k		0.5	2			1.58496	1.12678		NA		1.09415							0.0914209	0.460034	-6.8606e-05	-0.000244252	0.0829894	0.405424	0.0353027	0.252527	0.173021	0.996369	0.100632	0.408937	0.264722	1.84776	0.049938	0.278613
NA	ACSL5	K118k	NA		NA	NA	NA	NA	NA	NA	NA	NA	NA		0.146489	0.589762	0.0757723	0.390069	0.0707165	0.213574	0.254497	2.10448	0.0677055	0.313108	0.409787	4.97376	0.0720766	0.634969	0.201457	1.45818	0.044732	0.19204	0.000253269	0.000910895	0.0704166	0.561097
Q9NR19.LVNLkELADEALQK	ACSS2	K227k	ACSS2.K227k		0.25	0.5	0.25	0.75	0.584963	0.26967	1	0.683964	1	-0.26967							0.0376293	0.155509	-0.0440871	-0.186747	-0.019351	-0.0744635	0.0315316	0.2205	-0.153088	-0.957283	0.139774	0.837768	-0.053287	-0.236317	-0.131583	-1.39967
Q9NR19.AELGmGDSTSQSPPIkR	ACSS2	K271k	ACSS2.K271k		0.5	0.75			0.415037	0.171537		NA		-0.195439							-0.0777468	-0.372799	0.275117	2.40275	0.0457849	0.195191	-0.136158	-1.64483	-0.244123	-1.82768	-0.0837007	-0.388855	-0.149935	-0.875849	-0.0737777	-0.546143
Q9NR19.EkIGPIATPDYIQNAPGLPK	ACSS2	K638k	ACSS2.K638k		0.25	1			1.32193	1.23906		NA									-0.122602	-0.685696	0.0955749	0.487924	-0.0332784	-0.13524	-0.084187	-0.790595	-0.17375	-1.15818	0.0993811	0.520543	-0.0348154	-0.143854	-0.122718	-1.2552
P60709.MQkEITALAPSTMK	ACTB	K315k	ACTB.K315k		18.25	13.5	10	8.75	-0.428094	-1.30478	-0.187627	-0.489711	-0.187627	-0.931543	0.0639979	0.235942	0.149008	0.832677	-0.0850104	-0.386328	0.164916	1.05513	-0.156169	-0.972529	0.124589	0.701384	0.123896	1.41454	-0.125605	-0.718865	-0.137036	-0.814132	-0.0824066	-0.406637	0.00513586	0.0284087
P60709.HQGVMVGMGQkDSYVGDEAQSK	ACTB	K50k	ACTB.K50k		11.5	12.25	17.5	14.25	0.0892673	0.186405	-0.291766	-0.788029	-0.291766	1.25109	0.147702	0.778339	0.195569	0.85	-0.0478674	-0.116318	0.217488	1.62421	-0.118075	-0.650564	0.197675	1.39471	0.129482	1.51715	-0.187069	-1.29792	-0.156319	-0.987447	-0.146324	-0.895607	-0.0138161	-0.0805268
NA	ACTB	K215k	NA		NA	NA	NA	NA	NA	NA	NA	NA	NA		0.146489	0.589762	0.0757723	0.390069	0.0707165	0.213574	0.254497	2.10448	0.0677055	0.313108	0.409787	4.97376	0.0720766	0.634969	0.201457	1.45818	0.044732	0.19204	0.000253269	0.000910895	0.0704166	0.561097
NA	ACTB	K50kK61k	NA		NA	NA	NA	NA	NA	NA	NA	NA	NA		0.146489	0.589762	0.0757723	0.390069	0.0707165	0.213574	0.254497	2.10448	0.0677055	0.313108	0.409787	4.97376	0.0720766	0.634969	0.201457	1.45818	0.044732	0.19204	0.000253269	0.000910895	0.0704166	0.561097
P60709.DLTDYLMkILTER	ACTB	K191k	ACTB.K191k		2.75	3.5	0.75	1.5	0.321928	0.623013	0.807355	0.314346	0.807355		0.173429	1.03723	0.0947852	0.494872	0.0786443	0.327151	0.0355773	0.145873	0.186191	1.27012	0.282224	2.51087	-0.0581167	-0.474303	-0.154284	-0.968398	0.207614	1.52977	0.112355	0.615195	-0.162601	-1.97192
P60709.MQkEITALAPSTMkIK	ACTB	K315k	ACTB.K315k		4.25	3.5	4.75	2.75	-0.263034	-0.244491	-0.736966	-1.00047	-0.736966	0.578511	0.0453393	0.16126	-0.0722071	-0.26584	0.117546	0.547402	-0.311754	-2.99055	-0.244388	-1.96642	-0.569375	-9.89436	-0.0259943	-0.175751	-0.133597	-0.784895	-0.0865752	-0.433587	-0.220666	-1.68765	-0.021127	-0.128567
P60709.DSYVGDEAQSkR	ACTB	K61k	ACTB.K61k		6.5	6.5	5	5.5			0.131245	0.443709	0.131245	-0.286378	0.31655	0.572969	-0.169428	-0.236531	0.485979	1.01373	0.121355	0.675941	-0.0714605	-0.335004	0.122171	0.682318	0.0744011	0.663649	-0.111847	-0.61136	-0.0241905	-0.0958637	0.0318972	0.130303	-0.039384	-0.265965
P60709.EITALAPSTmkIK	ACTB	K326k	ACTB.K326k		6.25	8.5	7.25	8	0.428843	1.07724	0.137504	0.337062	0.137504	0.871001	0.31655	0.572969	-0.169428	-0.236531	0.485979	1.01373	0.121355	0.675941	-0.0714605	-0.335004	0.122171	0.682318	0.0744011	0.663649	-0.111847	-0.61136	-0.0241905	-0.0958637	0.0318972	0.130303	-0.039384	-0.265965
P60709.VAPEEHPVLLTEAPLNPkANR	ACTB	K113k	ACTB.K113k		16.75	21.25	18.75	16.25	0.338802	1.18368	-0.203533	-1.00858	-0.203533	1.86145	0.113186	0.864405	-0.0727097	-0.431976	0.185895	1.46957
P60709.kDLYANTVLSGGTTmYPGIADR	ACTB	K291k	ACTB.K291k		17.75	19	7.25	10.25	0.0968615	0.332179	0.485427	0.768567	0.485427	-0.366458							-0.149729	-0.913828	-0.288766	-2.61287	-0.444827	-5.85002	0.0536497	0.426983	-0.0768451	-0.371703	-0.0942187	-0.484725	-0.0599401	-0.272525	0.00780596	0.0438841
P60709.IkIIAPPER	ACTB	K328k	ACTB.K328k		4.25	2.75	2.5	4.25	-0.584963	-1.16363	0.710493	2.40257	0.710493	-2.59086							-0.211637	-1.55449	-0.351093	-3.71019	-0.527674	-8.35553	0.0538114	0.428662	-0.151752	-0.94494	-0.122843	-0.696659	-0.309454	-2.99863	-0.0129887	-0.0753312
O96019.QEYEEGGkQcVER	ACTL6A	K421k	ACTL6A.K421k	ACTL6A	0.75	0.75	1.5	1			-0.485427	-0.740669	-0.485427	-0.855968	-0.163233	-1.2278	-0.0115608	-0.122939	-0.151672	-2.67694	-0.134904	-0.78538	-0.204675	-1.47366	-0.294675	-2.70706	0.0269222	0.183063	-0.190203	-1.332	-0.0987386	-0.516029	-0.192967	-1.36242	-0.0410952	-0.280169
O96019.LkLIANNTTVER	ACTL6A	K379k	ACTL6A.K379k	ACTL6A	1.25	1.5	2.75	2	0.222392	0.136451	-0.415037	-1.23906	-0.415037	0.855968	0.182933	2.22514	0.190348	0.970879	-0.00741485	-0.0756885	0.371641	4.12537	-0.372262	-4.13836	0.197029	1.38755	0.287047	6.31921	0.0856997	0.427872	0.162496	1.04639	0.238436	1.91629	-0.0345044	-0.226733
O96019.LkIPEGLFDPSNVK	ACTL6A	K303k	ACTL6A.K303k	ACTL6A	2.75	2.75	2.5	4			0.628031	1.23906	0.628031	-0.855968	-0.0763784	-0.249713	-0.0958626	-0.494223	0.0194842	0.0805064	0.133979	0.777667	0.217587	1.6254	0.364476	3.9774	-0.0322614	-0.2266	0.279675	2.5106	0.100345	0.527347	0.208945	1.54549	0.0805731	0.675745
O96019.GkQGGPTYYIDTNALR	ACTL6A	K62k	ACTL6A.K62k	ACTL6A	1.5	1	1.5	1.5	-0.485427	-0.266619				-0.443709							0.231648	1.79985	0.102565	0.536339	0.318278	3.10335	0.0498086	0.387838	0.0200252	0.0780514	0.146676	0.898769	0.134374	0.791456	-0.0569042	-0.422638
P12814.ALDFIASkGVK	ACTN1	K103k	ACTN1.K103k		1.5	2			0.36257	0.443709		NA		-0.511353	0.231958	0.532944	0.612568	1.3356	-0.38061	-0.897498	-0.0548264	-0.241808	-0.19393	-1.35342	-0.133706	-0.775403	0.0536755	0.42725	-0.366861	-4.09271	0.000707944	0.00255094	-0.0942847	-0.485177	-0.165149	-2.02374
NA	ACTN1	K198k	NA		NA	NA	NA	NA	NA	NA	NA	NA	NA		0.206461	0.282988	0.353352	0.587564	-0.14689	-0.286399	-0.0177889	-0.0625088	-0.104074	-0.533208	-0.0307793	-0.117634	0.0370523	0.248713	0.197567	1.41388	0.0430563	0.183663	0.215452	1.62359	0.0694219	0.550364
NA	ACTN1	K214k	NA		NA	NA	NA	NA	NA	NA	NA	NA	NA		0.206461	0.282988	0.353352	0.587564	-0.14689	-0.286399	-0.0177889	-0.0625088	-0.104074	-0.533208	-0.0307793	-0.117634	0.0370523	0.248713	0.197567	1.41388	0.0430563	0.183663	0.215452	1.62359	0.0694219	0.550364
NA	ACTN1	K264k	NA		NA	NA	NA	NA	NA	NA	NA	NA	NA		0.206461	0.282988	0.353352	0.587564	-0.14689	-0.286399	-0.0177889	-0.0625088	-0.104074	-0.533208	-0.0307793	-0.117634	0.0370523	0.248713	0.197567	1.41388	0.0430563	0.183663	0.215452	1.62359	0.0694219	0.550364
NA	ACTN1	K431k	NA		NA	NA	NA	NA	NA	NA	NA	NA	NA		0.206461	0.282988	0.353352	0.587564	-0.14689	-0.286399	-0.0177889	-0.0625088	-0.104074	-0.533208	-0.0307793	-0.117634	0.0370523	0.248713	0.197567	1.41388	0.0430563	0.183663	0.215452	1.62359	0.0694219	0.550364
NA	ACTN1	K492k	NA		NA	NA	NA	NA	NA	NA	NA	NA	NA		0.206461	0.282988	0.353352	0.587564	-0.14689	-0.286399	-0.0177889	-0.0625088	-0.104074	-0.533208	-0.0307793	-0.117634	0.0370523	0.248713	0.197567	1.41388	0.0430563	0.183663	0.215452	1.62359	0.0694219	0.550364
NA	ACTN1	K516k	NA		NA	NA	NA	NA	NA	NA	NA	NA	NA		0.206461	0.282988	0.353352	0.587564	-0.14689	-0.286399	-0.0177889	-0.0625088	-0.104074	-0.533208	-0.0307793	-0.117634	0.0370523	0.248713	0.197567	1.41388	0.0430563	0.183663	0.215452	1.62359	0.0694219	0.550364
NA	ACTN1	K676k	NA		NA	NA	NA	NA	NA	NA	NA	NA	NA		0.206461	0.282988	0.353352	0.587564	-0.14689	-0.286399	-0.0177889	-0.0625088	-0.104074	-0.533208	-0.0307793	-0.117634	0.0370523	0.248713	0.197567	1.41388	0.0430563	0.183663	0.215452	1.62359	0.0694219	0.550364
P12814.ISNVNkALDFIASK	ACTN1	K95k	ACTN1.K95k		1	0.5			-0.736966	-0.443709		NA		-0.740669	-0.0172943	-0.0285741	0.030623	0.0729832	-0.0479173	-0.0772974	0.0119369	0.0445944	-0.238847	-1.89297	-0.215794	-1.60385	0.096769	0.968955	-0.0484744	-0.211097	-0.152503	-0.951872	0.00654059	0.0241398	0.0467401	0.328689
P12814.LDHLAEkFR	ACTN1	K398k	ACTN1.K398k		0.75	0.75	0.75	1.25			0.584963	0.396592	0.584963	-0.311533	-0.0520303	-0.296248	-0.052542	-0.713948	0.000511722	0.00513615	0.0462457	0.1975	-0.188343	-1.29301	-0.18837	-1.2933	0.0905199	0.878204	0.0443813	0.190278	-0.0984773	-0.514198	0.170868	1.129	0.0641864	0.495297
P12814.DLLLDPAWEkQQR	ACTN1	K31k	ACTN1.K31k		0.75	0.75	0.5	0.25			-0.584963	-0.26967	-0.584963	-0.114052	-0.0251365	-0.140878	-0.0750638	-0.615278	0.0499273	0.239462	-0.0784207	-0.376936	0.00830403	0.0305717	-0.158334	-0.992661	-0.0334641	-0.236754	0.231315	1.82274	0.115179	0.636693	0.0894375	0.452475	0.0521796	0.377901
P12814.DAkGISQEQMNEFR	ACTN1	K741k	ACTN1.K741k		1	0.75			-0.321928	-0.407821		NA		-0.407821	0.268057	0.943888	0.174695	1.07548	0.093362	0.242612	-0.140312	-0.802587	0.0268294	0.102971	-0.180009	-1.1654	-0.0621285	-0.51404	0.170393	1.12424	0.249262	2.06351	0.387272	4.53468	-0.0354356	-0.234075
P12814.VQEkcQLEINFNTLQTK	ACTN1	K331k	ACTN1.K331k		2.75	1.5	0.5	2.5	-0.777608	-0.705133	1.87447	1.52259	1.87447	-2.55399							0.15286	0.942148	0.214511	1.58852	0.314394	3.03589	-0.0237889	-0.158671	0.0169308	0.0651769	0.132465	0.77538	-0.0170864	-0.065817	-0.0519097	-0.375401
NA	ACTN4	K760k	NA		NA	NA	NA	NA	NA	NA	NA	NA	NA		0.0897314	0.338173	0.189838	4.07208	-0.100106	-0.615353	0.285558	2.56256	0.0337882	0.137584	0.452621	6.05855	0.0971494	0.974619	0.3168	3.12706	0.00284284	0.0103342	0.271582	2.38669	0.141061	1.56331
NA	ACTN4	K421k	NA		NA	NA	NA	NA	NA	NA	NA	NA	NA		-0.100016	-0.7213	0.0282392	0.100384	-0.128255	-0.538849	0.275169	2.40354	0.0453075	0.192807	0.425837	5.36301	0.0886958	0.852523	0.181755	1.24118	-0.0427372	-0.182079	0.133313	0.782498	0.100865	0.933241
NA	ACTN4	K592k	NA		NA	NA	NA	NA	NA	NA	NA	NA	NA		-0.100016	-0.7213	0.0282392	0.100384	-0.128255	-0.538849	0.275169	2.40354	0.0453075	0.192807	0.425837	5.36301	0.0886958	0.852523	0.181755	1.24118	-0.0427372	-0.182079	0.133313	0.782498	0.100865	0.933241
NA	ACTN4	K604k	NA		NA	NA	NA	NA	NA	NA	NA	NA	NA		-0.100016	-0.7213	0.0282392	0.100384	-0.128255	-0.538849	0.275169	2.40354	0.0453075	0.192807	0.425837	5.36301	0.0886958	0.852523	0.181755	1.24118	-0.0427372	-0.182079	0.133313	0.782498	0.100865	0.933241
NA	ACTN4	K622k	NA		NA	NA	NA	NA	NA	NA	NA	NA	NA		-0.100016	-0.7213	0.0282392	0.100384	-0.128255	-0.538849	0.275169	2.40354	0.0453075	0.192807	0.425837	5.36301	0.0886958	0.852523	0.181755	1.24118	-0.0427372	-0.182079	0.133313	0.782498	0.100865	0.933241
O43707.VPQkTIQEMQQK	ACTN4	K323k	ACTN4.K323k		0.75	0.25	0.5		-1	-0.683964	-1.58496	-0.740669	-1.58496		0.0267772	0.457385	0.0784052	0.648217	-0.0516281	-0.511769	-0.178833	-1.19347	-0.230317	-1.78292	-0.403725	-4.83187	0.0198657	0.129314	-0.174953	-1.17046	-0.0723521	-0.344323	-0.210959	-1.56944	-0.0460987	-0.323046
NA	ACTN4	K122k	NA		NA	NA	NA	NA	NA	NA	NA	NA	NA		0.206461	0.282988	0.353352	0.587564	-0.14689	-0.286399	-0.0177889	-0.0625088	-0.104074	-0.533208	-0.0307793	-0.117634	0.0370523	0.248713	0.197567	1.41388	0.0430563	0.183663	0.215452	1.62359	0.0694219	0.550364
NA	ACTN4	K217k	NA		NA	NA	NA	NA	NA	NA	NA	NA	NA		0.206461	0.282988	0.353352	0.587564	-0.14689	-0.286399	-0.0177889	-0.0625088	-0.104074	-0.533208	-0.0307793	-0.117634	0.0370523	0.248713	0.197567	1.41388	0.0430563	0.183663	0.215452	1.62359	0.0694219	0.550364
NA	ACTN4	K233k	NA		NA	NA	NA	NA	NA	NA	NA	NA	NA		0.206461	0.282988	0.353352	0.587564	-0.14689	-0.286399	-0.0177889	-0.0625088	-0.104074	-0.533208	-0.0307793	-0.117634	0.0370523	0.248713	0.197567	1.41388	0.0430563	0.183663	0.215452	1.62359	0.0694219	0.550364
NA	ACTN4	K323k	NA		NA	NA	NA	NA	NA	NA	NA	NA	NA		0.169224	0.285807	0.100549	0.258242	0.0686751	0.0745574	0.344874	3.58999	0.0968612	0.496692	0.537609	8.70328	0.0956998	0.953121	0.136854	0.812569	-0.0750573	-0.360719	0.116437	0.646371	0.0952117	0.857603
NA	ACTN4	K363k	NA		NA	NA	NA	NA	NA	NA	NA	NA	NA		0.00160351	0.0122406	-0.0235654	-0.110687	0.0251689	0.170692	0.372977	4.15334	0.137846	0.810139	0.572812	10.0309	0.0907292	0.881173	0.387045	4.5296	0.163984	1.06085	0.407753	5.00855	0.100221	0.924478
O43707.TEkQLEAIDQLHLEYAK	ACTN4	K521k	ACTN4.K521k		1	0.25			-1.32193	-0.748885		NA		-1.23906	0.218976	0.959057	-0.0728464	-0.128382	0.291822	0.677965	-0.0771535	-0.36917	-0.0473934	-0.203281	-0.152205	-0.936189	-0.0114834	-0.0708928	-0.120947	-0.681601	-0.0885533	-0.446606	-0.125347	-0.716779	-0.0145546	-0.0852043
O43707.kAGTQIENIDEDFRDGLK	ACTN4	K66k	ACTN4.K66k		0.75	0.5			-0.415037	-0.171537		NA		-0.346609	0.129308	0.835172	0.00414792	0.0216159	0.12516	0.845656	0.289485	2.62423	-0.0727091	-0.342397	0.358201	3.85064	0.139759	1.71602	0.14795	0.910257	-0.0600708	-0.273252	-0.0137482	-0.0522506	0.093464	0.834835
O43707.INNVNkALDFIASK	ACTN4	K114k	ACTN4.K114k		2.25	2			-0.152003	-0.204865		NA		-0.233898	0.242863	0.534958	-0.201577	-0.4626	0.444441	1.14733	-0.196726	-1.38419	-0.0424871	-0.178878	-0.249721	-2.03859	-0.0595156	-0.489524	-0.212908	-1.59281	-0.152227	-0.949321	-0.228066	-1.78093	-0.0272641	-0.171922
O43707.TIQEMQQkLEDFR	ACTN4	K331k	ACTN4.K331k		0.5	1.5	1.5	0.25	1.22239	0.64267	-1.80735	-1.75778	-1.80735	1.48441							-0.0519482	-0.226665	-0.191238	-1.32413	-0.239609	-1.90298	0.0537473	0.427996	0.0402582	0.169889	0.00472276	0.0173012	-0.084361	-0.41919	0.0159661	0.0942539
NA	ACTN4	K417k	NA		NA	NA	NA	NA	NA	NA	NA	NA	NA								0.232111	1.80577	-0.160888	-1.01668	0.208263	1.51503	0.151645	1.96288	0.214314	1.60977	0.16805	1.10085	0.297262	2.79261	0.0207862	0.126241
Q9NZ32.SVSkEYYNQTGR	ACTR10	K375k	ACTR10.K375k		1.25	2	1.5	1	0.584963	0.748885	-0.485427	-0.740669	-0.485427	1.26033	-0.12913	-0.926757	-0.154321	-0.539032	0.0251917	0.107327	-0.163562	-1.04212	-0.00398307	-0.0144091	-0.270188	-2.32939	-0.0615762	-0.512296	-0.0743187	-0.356215	-0.0130398	-0.0494164	-0.0944132	-0.486056	-0.0275327	-0.173883
Q9NZ32.TcFVSDLkR	ACTR10	K221k	ACTR10.K221k		2	2	2.75	2			-0.415037	-1.23906	-0.415037	-0.786465	0.180863	0.757929	0.0709188	0.257355	0.109944	0.451262	0.157002	0.980257	0.104977	0.553485	0.386637	4.44645	0.0200748	0.130846	0.125444	0.717557	0.0210065	0.0821978	0.0367405	0.152949	0.0469236	0.33031
Q9NZ32.ALHkELETQLLEQcTVDTSVAK	ACTR10	K173k	ACTR10.K173k		0.75	0.5			-0.415037	-0.170176		NA		-0.18612	0.105504	0.881165	0.0716639	0.920314	0.0338401	0.679051	0.240481	1.91446	0.0736353	0.347917	0.422849	5.28902	0.06438	0.543962	0.235202	1.87348	0.179587	1.21842	0.291051	2.69099	0.0249876	0.155511
NA	ACTR10	K410k	NA		NA	NA	NA	NA	NA	NA	NA	NA	NA		0.356324	2.9707	0.127508	0.679922	0.228817	1.43222	0.276559	2.42447	0.168354	1.0885	0.536961	8.68024	0.0417527	0.310285	0.144403	0.878457	0.09933	0.520184	0.137	0.813822	0.0202514	0.122608
Q9NZ32.EQSLPSVMGSVPEGVLEDIkAR	ACTR10	K211k	ACTR10.K211k		0.5	0.25		0.25	-0.584963	-0.26967	1	0.407821	1	-0.683964							0.162709	0.434268	-0.44514	-2.0969	-0.238516	-0.713729	0.204858	1.37819	0.154845	0.285214	-0.183823	-0.33038	0.00634657	0.00609664	0.120075	0.384936
NA	ACTR10	K169k	NA		NA	NA	NA	NA	NA	NA	NA	NA	NA								0.171546	1.11996	0.14269	0.85169	0.325041	3.22297	0.0111348	0.0685875	0.166399	1.08452	-0.000397872	-0.00143182	0.129422	0.750065	0.0749419	0.611037
P61163.AcYLSINPQkDETLETEK	ACTR1A	K230k	ACTR1A.K230k		0.25	1	0.25	1.5	1.32193	0.748885	1.80735	1.75778	1.80735	-0.443709	0.0436561	0.460582	-0.00225162	-0.0126941	0.0459077	0.420809	0.0526246	0.230198	-0.108393	-0.578152	-0.0373246	-0.15407	0.0621313	0.518503	0.0307801	0.125191	-0.0572972	-0.257954	-0.0758033	-0.365288	0.0395732	0.267524
P61163.DETLETEkAQYYLPDGSTIEIGPSR	ACTR1A	K238k	ACTR1A.K238k		0.5			1	-1.58496	-0.740669	2.32193	1.03753	2.32193	-1.45721	0.109827	0.661682	0.0492493	0.289666	0.0605778	0.58294	0.0440156	0.186393	-0.0564096	-0.25026	-0.0595269	-0.267156	0.0387507	0.282931	-0.210291	-1.56147	-0.061755	-0.282676	-0.0883575	-0.445311	-0.0667372	-0.521826
P61163.AGFAGDQIPkYcFPNYVGR	ACTR1A	K32k	ACTR1A.K32k		2	2	1.5	1.75		NA	0.192645	0.170176	0.192645	-0.407821	0.192522	1.45005	0.000555784	0.00222461	0.191967	1.04736	0.225969	1.72822	-0.0091517	-0.033808	0.293263	2.68438	0.0907249	0.881113	-0.0448551	-0.192659	0.157539	0.998956	0.228558	1.78722	-0.0909357	-0.802411
NA	ACTR1A	K308k	NA		NA	NA	NA	NA	NA	NA	NA	NA	NA		0.356324	2.9707	0.127508	0.679922	0.228817	1.43222	0.276559	2.42447	0.168354	1.0885	0.536961	8.68024	0.0417527	0.310285	0.144403	0.878457	0.09933	0.520184	0.137	0.813822	0.0202514	0.122608
P61160.EkLcYVGYNIEQEQK	ACTR2	K219k	ACTR2.K219k		1.5	2	0.5	1	0.36257	0.328714	0.736966	0.740669	0.736966		-0.218114	-1.03431	-0.0320371	-0.0976378	-0.186077	-0.713151	0.134753	0.784117	-0.116877	-0.641402	0.16763	1.08143	0.0970955	0.973815	-0.182403	-1.24803	-0.0258688	-0.103199	-0.218333	-1.65882	-0.0703308	-0.560168
P61160.STTkVGNIEIK	ACTR2	K46k	ACTR2.K46k		3.25	2.75	4.25	4.25	-0.222392	-0.24838				-0.683964	-0.224435	-0.838019	-0.0188124	-0.0339167	-0.205623	-0.496879	0.128991	0.736698	0.00101152	0.00361516	0.246188	1.99062	0.049383	0.383588	0.184227	1.26741	0.0538558	0.239351	0.182913	1.25344	0.058576	0.438918
P61160.VLkGDVEK	ACTR2	K331k	ACTR2.K331k			0.5	0.5		1.58496	0.740669	-1.58496	-0.740669	-1.58496	1.39234	-0.0259654	-0.121111	0.0645367	0.232885	-0.090502	-0.462528	-0.0623198	-0.282583	0.196019	1.37637	0.198235	1.40094	-0.099684	-1.01277	0.25576	2.15484	-0.171933	-1.13975	0.251177	2.0902	0.192163	2.62084
P61160.VGNIEIkDLmVGDEASELR	ACTR2	K53k	ACTR2.K53k		8.25	8	7.75	7.25	-0.0430687	-0.0643877	-0.0931094	-0.311533	-0.0931094	-0.0744614	-0.0927465	-0.899508	-0.0510581	-0.374877	-0.0416885	-0.25812	0.0575394	0.256345	0.121283	0.675374	0.240358	1.91284	-0.0245964	-0.164877	0.187191	1.29924	0.101999	0.539106	0.22733	1.77152	0.0382769	0.256899
P61160.ILLTEPPmNPTkNR	ACTR2	K118k	ACTR2.K118k		4.75	4.75	5.25	5			-0.0671142	-0.151697	-0.0671142	-0.151697	-0.0499468	-0.0929695	-0.00891661	-0.029984	-0.0410302	-0.145329	0.0806932	0.39101	0.141016	0.837225	0.215522	1.6006	-0.0232767	-0.154764	0.248817	2.05734	0.141879	0.856155	0.144329	0.877796	0.0480472	0.340292
P61160.nckILLTEPPMNPTK	ACTR2	K106k	ACTR2.K106k		1	1		0.75			2	1.23906	2	-0.748885	-0.0686852	-0.836224	-0.0484756	-0.235151	-0.0202096	-0.0421391	-0.249462	-2.03506	-0.207911	-1.51095	-0.409796	-4.97398	-0.0160329	-0.101883	0.0661596	0.307803	0.0946345	0.487572	0.0694846	0.327237	-0.0127938	-0.0741145
P61160.kVVVcDnGTGFVK	ACTR2	K7k	ACTR2.K7k		2.25	2.75	1.75	1.75	0.263034	0.683964				-0.683964	0.136005	1.04648	0.115435	0.809985	0.02057	0.13176	-0.183291	-1.23962	-0.0906612	-0.455005	-0.370599	-4.10362	-0.0357426	-0.256347	-0.261677	-2.23996	0.109572	0.594324	-0.0441942	-0.189341	-0.166802	-2.05777
P61160.IIkVGGER	ACTR2	K253k	ACTR2.K253k		1	0.75	0.25	0.75	-0.321928	-0.151697	1	0.24838	1	-0.359489	0.105614	0.831903	0.0866055	0.769909	0.0190087	0.240707	-0.0537111	-0.235906	-0.00616507	-0.0225013	0.00123012	0.00440037	-0.0183464	-0.118294	-0.0815591	-0.401239	0.224642	1.73743	-0.166685	-1.08734	-0.137576	-1.50202
P61160.GDVEkLSK	ACTR2	K336k	ACTR2.K336k		1	0.75			-0.321928	-0.204865		NA		-0.407821	0.268057	0.943888	0.174695	1.07548	0.093362	0.242612	-0.140312	-0.802587	0.0268294	0.102971	-0.180009	-1.1654	-0.0621285	-0.51404	0.170393	1.12424	0.249262	2.06351	0.387272	4.53468	-0.0354356	-0.234075
P61160.VLEkLGVTVR	ACTR2	K388k	ACTR2.K388k		2	2.25	2	1.75	0.152003	0.195439	-0.169925	-0.407821	-0.169925	-0.396592	0.25888	0.691342	0.0291956	0.0529191	0.229684	0.403821	0.0466589	0.199576	0.188188	1.29135	0.217644	1.62609	-0.0546113	-0.437006	-0.051803	-0.228454	0.192588	1.35823	0.0272649	0.10937	-0.109805	-1.0592
P61160.ELkQLYLER	ACTR2	K322k	ACTR2.K322k		1.5	2	2.75	1.75	0.36257	0.443709	-0.584963	-0.667489	-0.584963	1.58416	0.27603	1.74752	0.123749	0.713476	0.152281	1.05667	-0.207344	-1.50438	0.23285	1.81522	0.0142501	0.053732	-0.169856	-2.37765	0.0510117	0.224293	-0.0712956	-0.337992	0.0589653	0.267121	0.0549527	0.403932
NA	ACTR2	K19k	NA		NA	NA	NA	NA	NA	NA	NA	NA	NA		0.356324	2.9707	0.127508	0.679922	0.228817	1.43222	0.276559	2.42447	0.168354	1.0885	0.536961	8.68024	0.0417527	0.310285	0.144403	0.878457	0.09933	0.520184	0.137	0.813822	0.0202514	0.122608
P61160.QEYQEkGVR	ACTR2	K381k	ACTR2.K381k		2	2	1.5	1.25			-0.222392	-0.115138	-0.222392	-0.10742	0.0694152	1.08412	-0.0662192	-0.92009	0.135634	2.20397	0.135588	0.791106	0.146775	0.887497	0.299126	2.77932	-0.00431654	-0.0254429	0.12242	0.693288	0.194833	1.38317	0.0818551	0.403122	-0.0325349	-0.211424
P61160.STTkVGNIEIKDLMVGDEASELR	ACTR2	K46k	ACTR2.K46k		0.25	0.75	0.25		1	0.396592	-1	-0.407821	-1	0.667218							-0.210203	-1.53766	-0.0348347	-0.14242	-0.259214	-2.17072	-0.0676688	-0.582112	0.0178313	0.0688923	0.33708	3.49882	0.267446	2.32478	-0.143439	-1.60588
NA	ACTR2	K86k	NA		NA	NA	NA	NA	NA	NA	NA	NA	NA								0.311388	2.9843	0.0411761	0.172494	0.446324	5.88966	0.104266	1.08358	0.23693	1.89629	0.0716992	0.340406	0.245075	2.00585	0.0742383	0.603152
NA	ACTR2	K97k	NA		NA	NA	NA	NA	NA	NA	NA	NA	NA								0.311388	2.9843	0.0411761	0.172494	0.446324	5.88966	0.104266	1.08358	0.23693	1.89629	0.0716992	0.340406	0.245075	2.00585	0.0742383	0.603152
NA	ACTR2	K195k	NA		NA	NA	NA	NA	NA	NA	NA	NA	NA								0.311388	2.9843	0.0411761	0.172494	0.446324	5.88966	0.104266	1.08358	0.23693	1.89629	0.0716992	0.340406	0.245075	2.00585	0.0742383	0.603152
NA	ACTR2	K351kM353m	NA		NA	NA	NA	NA	NA	NA	NA	NA	NA								0.037598	0.155362	0.127646	0.725825	0.260548	2.18967	-0.0347466	-0.247724	0.241032	1.95103	-0.177186	-1.19344	0.0841924	0.418102	0.187905	2.5208
P61158.QYTGINAISKk	ACTR3	K265k	ACTR3.K265k		0.25	1	0.75	0.5	1.32193	0.526047	-0.415037	-0.26967	-0.415037	0.722012	-0.155752	-0.863424	0.141691	0.612904	-0.297443	-1.62546	0.275952	2.41532	-0.0528324	-0.231287	0.351015	3.70867	0.126867	1.46863	0.242586	1.972	-0.195469	-1.39029	0.0132241	0.0501522	0.196819	2.73288
NA	ACTR3	K251k	NA		NA	NA	NA	NA	NA	NA	NA	NA	NA		0.433795	0.458756	0.556272	0.587277	-0.122478	-0.0217614	0.0610276	0.275411	0.0134297	0.0504725	0.0443796	0.188195	0.0183664	0.118438	-0.00558136	-0.0205187	0.0301865	0.12249	-0.0355226	-0.147181	-0.0160705	-0.0949291
P61158.ESAkVGDQAQR	ACTR3	K42k	ACTR3.K42k			0.25		0.75	1	0.407821	2	1.23906	2	-0.683964	0.0791104	0.480609	0.00623279	0.0173008	0.0728776	0.231888	0.105807	0.559439	0.00874696	0.03226	0.133147	0.77076	0.0374524	0.271356	0.134949	0.796324	-0.0308096	-0.125325	0.0911259	0.463763	0.0744752	0.605802
NA	ACTR3	K99k	NA		NA	NA	NA	NA	NA	NA	NA	NA	NA		0.0346223	0.0951388	-0.041041	-0.106663	0.0756633	0.272216	0.256812	2.13685	0.15282	0.941784	0.514353	7.90652	0.0401271	0.29537	0.400257	4.83149	0.030411	0.12351	0.234066	1.85857	0.166172	2.04476
NA	ACTR3	K225k	NA		NA	NA	NA	NA	NA	NA	NA	NA	NA		0.0346223	0.0951388	-0.041041	-0.106663	0.0756633	0.272216	0.256812	2.13685	0.15282	0.941784	0.514353	7.90652	0.0401271	0.29537	0.400257	4.83149	0.030411	0.12351	0.234066	1.85857	0.166172	2.04476
NA	ACTR3	K240k	NA		NA	NA	NA	NA	NA	NA	NA	NA	NA		0.0346223	0.0951388	-0.041041	-0.106663	0.0756633	0.272216	0.256812	2.13685	0.15282	0.941784	0.514353	7.90652	0.0401271	0.29537	0.400257	4.83149	0.030411	0.12351	0.234066	1.85857	0.166172	2.04476
NA	ACTR3	K244k	NA		NA	NA	NA	NA	NA	NA	NA	NA	NA		0.0346223	0.0951388	-0.041041	-0.106663	0.0756633	0.272216	0.256812	2.13685	0.15282	0.941784	0.514353	7.90652	0.0401271	0.29537	0.400257	4.83149	0.030411	0.12351	0.234066	1.85857	0.166172	2.04476
P61158.GVDDLDFFIGDEAIEkPTYATK	ACTR3	K69k	ACTR3.K69k		1.75	1.5	0.5	0.75	-0.192645	-0.26967	0.415037	0.26967	0.415037	-0.621125	-0.0967203	-0.663046	-0.131043	-2.24067	0.0343223	0.365988	0.187952	1.28883	-0.00857665	-0.0316101	0.165702	1.06271	0.0758338	0.681604	0.0873101	0.438406	0.0371637	0.154965	0.137725	0.820045	0.0225308	0.138236
P61158.YSYVcPDLVkEFNKYDTDGSK	ACTR3	K240k	ACTR3.K240k		1.25	1.5	1.75	1	0.222392	0.171537	-0.678072	-0.748885	-0.678072	1.01004	0.184045	0.951472	0.021581	0.0840963	0.162464	0.410954	0.0231252	0.0903247	0.183527	1.24208	0.191003	1.32159	-0.0618936	-0.515841	0.0868452	0.435356	-0.0222837	-0.0876404	0.147104	0.902625	0.0490317	0.349124
NA	ACTR3	K265k	NA		NA	NA	NA	NA	NA	NA	NA	NA	NA
NA	ACTR3	K317k	NA		NA	NA	NA	NA	NA	NA	NA	NA	NA
Q9H9F9.LLGSTLTSEEkQER	ACTR5	K294k	ACTR5.K294k		1.25	0.75	0.25	0.25	-0.584963	-0.396592				-0.396592	0.384718	1.90343	0.202697	0.768544	0.182021	0.43866	0.114675	0.624711	-0.0253417	-0.099849	0.129889	0.743997	0.0540277	0.430912	0.0852392	0.424878	0.334373	3.4477	0.164532	1.0662	-0.111936	-1.09039
Q9GZN1.YkSGEQILR	ACTR6	K262k	ACTR6.K262k		1.5	1	2	1.5	-0.485427	-0.328714	-0.36257	-0.195439	-0.36257								-0.0477633	-0.205153	-0.256399	-2.13104	-0.194201	-1.35638	0.0805053	0.741647	-0.183593	-1.26065	-0.112625	-0.617236	-0.152871	-0.955275	-0.0318858	-0.206445
Q9H981.YLEIPLkDLK	ACTR8	K225k	ACTR8.K225k		0.75	0.25		0.25	-1	-0.683964	1	0.407821	1	-1.10712	0.00398303	0.0320271	-0.145025	-1.02862	0.149008	1.07039	0.212464	1.56424	0.147168	0.890983	0.440701	5.74168	0.0251953	0.169515	0.235567	1.87829	0.194541	1.37993	0.299482	2.82946	0.0184328	0.110412
Q9BYD9.DIAkVAPANTAVQVIAPPER	ACTRT3	K316k	ACTRT3.K316k		1.25	2.25	2	1.25	0.736966	0.888034	-0.584963	-0.553925	-0.584963	1.38201	-0.116706	-1.19471	-0.152558	-0.854488	0.0358527	0.439688	0.0261746	0.103468	0.0223001	0.0868191	0.141337	0.839985	0.00149503	0.00865086	0.190601	1.33636	0.00498333	0.0182753	0.0107635	0.0404156	0.0833983	0.709295
NA	ACVR1	K497k	NA		NA	NA	NA	NA	NA	NA	NA	NA	NA
P36896.TIVLQEIIGkGR	ACVR1B	K215k	ACVR1B.K215k		0.75	0.75	0.5	0.25			-0.584963	-0.26967	-0.584963	-0.177285							-0.218694	-1.63879	-0.0703952	-0.32874	-0.245712	-1.9842	-0.0572236	-0.464687	-0.146105	-0.893644	-0.0393998	-0.165716	-0.00178772	-0.00647048	-0.0479426	-0.339359
NA	ACVR2A	K280k	NA		NA	NA	NA	NA	NA	NA	NA	NA	NA
NA	ACVRL1	K491k	NA		NA	NA	NA	NA	NA	NA	NA	NA	NA
Q03154.FMEDTAAEkLHK	ACY1	K218k	ACY1.K218k		0.5	0.75	0.5	0.75	0.415037	0.170176	0.415037	0.171537	0.415037		-0.254299	-2.05381	-0.166022	-1.0739	-0.088277	-0.370522	0.00266824	0.00960099	-0.0856176	-0.422162	-0.108373	-0.578008	0.0340665	0.241888	0.0362512	0.150625	-0.0374748	-0.15645	-0.13718	-0.81537	0.0331251	0.21598
Q03154.LQSNPHLkEGSVTSVNLTK	ACY1	K244k	ACY1.K244k		0.75	0.75	1.75	1			-0.678072	-1.23906	-0.678072	-1.23906	0.166138	0.446555	0.0935105	0.471394	0.0726273	0.162629	0.236805	1.86629	0.125508	0.708692	0.350374	3.69616	0.0429457	0.321387	0.172043	1.14085	-0.105963	-0.567724	0.0601354	0.273611	0.124908	1.29013
Q03154.VckDMNLTLEPEIMPAATDNR	ACY1	K332k	ACY1.K332k		2	2.5	2.5	2.5	0.289507	0.443709				-0.574189	0.094071	1.17871	-0.138152	-1.47588	0.232223	2.27203	0.203388	1.45898	0.09763	0.501963	0.264479	2.24605	0.0408085	0.301593	0.374737	4.25977	0.0608967	0.277861	0.483809	7.06636	0.141008	1.56238
Q03154.GAQDMkcVSIQYLEAVR	ACY1	K115k	ACY1.K115k		2.5	4.25	2.5	4.75	0.710493	1.17589	0.862496	1.01346	0.862496	-0.396592							-0.0093745	-0.0346622	0.0431565	0.18216	0.102543	0.536185	-0.0202699	-0.132279	-0.198634	-1.42595	-0.0946266	-0.487518	-0.103906	-0.552798	-0.0467304	-0.328603
P00813.LkNDQANYSLNTDDPLIFK	ADA	K284k	ADA.K284k		2.5	2.75	2.75	3	0.125531	0.13266	0.115477	0.151697	0.115477		0.0179692	0.028681	0.189551	0.340637	-0.171582	-0.352384	0.12932	0.739371	-0.209538	-1.52988	-0.0756875	-0.360259	0.130754	1.54105	0.084525	0.420251	-0.0988001	-0.51646	-0.0762176	-0.367834	0.0823681	0.696976
NA	ADA2	K55k	NA		NA	NA	NA	NA	NA	NA	NA	NA	NA		0.049613	0.117935	0.00945233	0.0162111	0.0401607	0.0817509	0.0278038	0.0503708	0.332502	0.769073	0.260514	0.771192	-0.0846146	-0.278425	0.337024	0.203924	-0.549643	-0.401718	-0.280019	-0.128472	0.456848	0.526012
O14672.INTTADEkDPTNPFR	ADAM10	K284k	ADAM10.K284k		2.5	2.75	2.5	3.25	0.125531	0.170176	0.347923	1.00815	0.347923	-0.683964	-0.157927	-0.189848	-0.289953	-0.364748	0.132026	0.130118	-0.330797	-3.32697	0.0632505	0.287784	-0.30528	-2.8811	-0.15205	-1.97161	-0.00457372	-0.016745	0.224098	1.73058	0.0576794	0.260046	-0.102742	-0.959051
O14672.kMDPSTcASTGSVQWSR	ADAM10	K601k	ADAM10.K601k		1	1	0.5	0.75			0.415037	0.170176	0.415037	-0.204865	-0.061306	-0.310609	-0.109696	-0.515306	0.04839	0.169298	-0.156806	-0.978429	-0.0808528	-0.392005	-0.228828	-1.76409	-0.0293076	-0.202204	-0.130709	-0.760728	-0.17479	-1.1688	-0.192701	-1.35948	0.0198056	0.119597
O14672.NLGQkEnGNYIMYAR	ADAM10	K410k	ADAM10.K410k		0.5	0.5	1.75	0.25			-2	-2.26568	-2	2.09432							-0.139644	-0.825445	0.0251564	0.0990468	-0.226578	-1.73584	-0.0635907	-0.534969	-0.189583	-1.23276	-0.131781	-0.765903	-0.230709	-1.69924	-0.0193547	-0.114585
O14672.LPPPKPLPGTLkR	ADAM10	K721k	ADAM10.K721k			0.25	3.5	3	1	0.407821	-0.206451	-0.145569	-0.206451	-0.23078							-0.260915	-2.1949	-0.183399	-1.24075	-0.498943	-7.41056	-0.029911	-0.207125	-0.0664403	-0.309428	-0.0893405	-0.451829	-0.26528	-2.29272	0.0102891	0.0587166
Q13444.EPLEPQVLQDDLPISLKk	ADAM15	K59k	ADAM15.K59k		1.25	2	1.75	1.5	0.584963	0.667218	-0.192645	-0.26967	-0.192645	1.39234	-0.278749	-0.365301	0.0469302	0.273153	-0.32568	-2.17349	0.0589235	0.263859	0.0230215	0.0898828	0.0129631	0.048628	0.0138534	0.0868259	-0.198421	-1.42355	-0.120852	-0.68085	-0.297967	-2.80427	-0.0348519	-0.229464
Q13444.LcQLkGPTcQYR	ADAM15	K729k	ADAM15.K729k		0.75	2	4.75	2	1.16993	1.81269	-1.152	-2.64173	-1.152	2.64599	0.0703553	0.836768	0.0272855	0.224511	0.0430698	0.66272	-0.240159	-1.91022	0.141735	0.843425	-0.257164	-2.14179	-0.14736	-1.87177	-0.337308	-3.50313	-0.0586563	-0.265416	-0.287026	-2.62631	-0.125198	-1.29479
NA	ADAM17	K728k	NA		NA	NA	NA	NA	NA	NA	NA	NA	NA		-0.0898613	-0.192629	-0.062985	-0.0983975	-0.0268763	-0.113198	0.0880578	0.348872	-0.0518969	-0.208081	0.0958976	0.364383	0.0507049	0.347802	0.25957	0.913552	0.185141	0.53868	0.146862	0.344082	0.042078	0.139388
NA	ADAM17	K820k	NA		NA	NA	NA	NA	NA	NA	NA	NA	NA		-0.0898613	-0.192629	-0.062985	-0.0983975	-0.0268763	-0.113198	0.0880578	0.348872	-0.0518969	-0.208081	0.0958976	0.364383	0.0507049	0.347802	0.25957	0.913552	0.185141	0.53868	0.146862	0.344082	0.042078	0.139388
P78536.SEDIknVSR	ADAM17	K173k	ADAM17.K173k		0.25	0.25	0.5	0.75			0.415037	0.26967	0.415037	-0.295831							-0.192061	-1.33304	-0.324494	-3.2132	-0.510124	-7.76795	0.0511016	0.400857	-0.145297	-0.886421	-0.164235	-1.0633	-0.213804	-1.60361	0.00850891	0.0480397
NA	ADAM8	K693k	NA		NA	NA	NA	NA	NA	NA	NA	NA	NA		-0.0898613	-0.192629	-0.062985	-0.0983975	-0.0268763	-0.113198	0.0880578	0.348872	-0.0518969	-0.208081	0.0958976	0.364383	0.0507049	0.347802	0.25957	0.913552	0.185141	0.53868	0.146862	0.344082	0.042078	0.139388
Q13443.MDDVYkEPLK	ADAM9	K170k	ADAM9.K170k		4.25	4.75	2	2.75	0.152003	0.396592	0.415037	0.378828	0.415037	-0.139899	-0.182499	-1.29159	-0.119632	-1.2792	-0.0628667	-0.306556	-0.015579	-0.0590558	0.119358	0.660439	0.0239649	0.0939148	-0.0520678	-0.41069	-0.103148	-0.547335	-0.108557	-0.586793	-0.214071	-1.60683	0.00243043	0.0132233
Q13443.SQTYESDGkNQANPSR	ADAM9	K741k	ADAM9.K741k		6	7.75	11.75	9.75	0.356144	0.940743	-0.263034	-0.827489	-0.263034	1.84986	-0.0996543	-1.04457	-0.0496906	-0.188593	-0.0499638	-0.184995	0.282027	2.50785	0.150746	0.922984	0.495884	7.31498	0.0506569	0.396362	0.250632	2.08258	0.0196589	0.0765115	0.222457	1.70999	0.103776	0.973403
Q13443.EcELDPccEGSTckLK	ADAM9	K448k	ADAM9.K448k		1.5	1	0.5	0.5	-0.485427	-0.740669				-0.740669	-0.0172943	-0.0285741	0.030623	0.0729832	-0.0479173	-0.0772974	0.0119369	0.0445944	-0.238847	-1.89297	-0.215794	-1.60385	0.096769	0.968955	-0.0484744	-0.211097	-0.152503	-0.951872	0.00654059	0.0241398	0.0467401	0.328689
Q13443.MDDVYKEPLkcGVSNK	ADAM9	K174k	ADAM9.K174k		0.5		0.25	0.25	-1.58496	-0.740669				-0.855968	-0.0794077	-0.470431	-0.160038	-0.934315	0.0806307	0.397487	0.0776486	0.372197	0.239187	1.89742	0.378972	4.28038	-0.0623321	-0.520756	0.190597	1.33631	-0.103629	-0.550801	-0.0279472	-0.112409	0.132196	1.40996
Q13443.DcScGAkScIMNSGASGSR	ADAM9	K368k	ADAM9.K368k		2	2.25	2	1.5	0.152003	0.151697	-0.36257	-0.320564	-0.36257	0.623013	0.0424942	0.528948	-0.0299192	-0.300243	0.0724134	0.763195	-0.124771	-0.702829	-0.0342533	-0.139728	-0.0466038	-0.199299	-0.0349279	-0.249287	-0.0995629	-0.521824	-0.152859	-0.955161	-0.110024	-0.597696	0.0239459	0.148132
Q13443.DcFIEVNSkGDR	ADAM9	K546k	ADAM9.K546k		1	0.75	0.75	0.25	-0.321928	-0.407821	-1	-0.396592	-1	-0.295831							-0.291455	-2.65548	-0.110777	-0.595635	-0.383119	-4.36972	-0.0697174	-0.606431	-0.217985	-1.65454	-0.0153861	-0.0588632	-0.238247	-1.91378	-0.0910276	-0.803579
Q13443.SFAEcAYGDcckDcR	ADAM9	K462k	ADAM9.K462k		1.5	2.75	2	1.75	0.777608	1.11702	-0.169925	-0.407821	-0.169925	1.36094							-0.0950062	-0.484066	-0.186162	-1.26981	-0.230845	-1.78963	0.0351739	0.251412	-0.278286	-2.48908	-0.0185608	-0.0719207	-0.192873	-1.36138	-0.116695	-1.16168
NA	ADAP1	K172k	NA		NA	NA	NA	NA	NA	NA	NA	NA	NA		-0.0898613	-0.192629	-0.062985	-0.0983975	-0.0268763	-0.113198	0.0880578	0.348872	-0.0518969	-0.208081	0.0958976	0.364383	0.0507049	0.347802	0.25957	0.913552	0.185141	0.53868	0.146862	0.344082	0.042078	0.139388
NA	ADAR	K1115k	NA		NA	NA	NA	NA	NA	NA	NA	NA	NA		-0.0115097	-0.0344646	0.187921	1.03099	-0.199431	-1.11788	-0.166951	-1.07482	-0.0723287	-0.340138	-0.18874	-1.29725	-0.0365115	-0.263064	-0.0500759	-0.2194	-0.244949	-2.00413	-0.0864458	-0.43274	0.0875565	0.760011
NA	ADAR	K637k	NA		NA	NA	NA	NA	NA	NA	NA	NA	NA		0.019897	0.128154	0.407005	0.569879	-0.387108	-0.527316	0.27861	2.45555	-0.103854	-0.545474	0.255138	2.11341	0.14758	1.87638	-0.10993	-0.577534	-0.140793	-0.687693	-0.00915904	-0.0315112	0.000259122	0.00126045
P55265.kQGKQEAADAALR	ADAR	K778k	ADAR.K778k		0.25		0.25	0.5	-1	-0.407821	0.584963	0.26967	0.584963	-0.740669	0.112592	0.669833	0.140153	0.716586	-0.0275613	-0.128127	0.0656321	0.301234	-0.431976	-5.51724	-0.239668	-1.90375	0.19201	2.94547	0.0318985	0.130309	-0.309665	-3.00229	-0.303694	-2.90021	0.153465	1.79225
NA	ADAR	K48k	NA		NA	NA	NA	NA	NA	NA	NA	NA	NA		-0.0898613	-0.192629	-0.062985	-0.0983975	-0.0268763	-0.113198	0.0880578	0.348872	-0.0518969	-0.208081	0.0958976	0.364383	0.0507049	0.347802	0.25957	0.913552	0.185141	0.53868	0.146862	0.344082	0.042078	0.139388
NA	ADAR	K443kN451n	NA		NA	NA	NA	NA	NA	NA	NA	NA	NA		-0.0898613	-0.192629	-0.062985	-0.0983975	-0.0268763	-0.113198	0.0880578	0.348872	-0.0518969	-0.208081	0.0958976	0.364383	0.0507049	0.347802	0.25957	0.913552	0.185141	0.53868	0.146862	0.344082	0.042078	0.139388
NA	ADAR	K564k	NA		NA	NA	NA	NA	NA	NA	NA	NA	NA		-0.0898613	-0.192629	-0.062985	-0.0983975	-0.0268763	-0.113198	0.0880578	0.348872	-0.0518969	-0.208081	0.0958976	0.364383	0.0507049	0.347802	0.25957	0.913552	0.185141	0.53868	0.146862	0.344082	0.042078	0.139388
NA	ADAR	K944k	NA		NA	NA	NA	NA	NA	NA	NA	NA	NA		-0.0235082	-0.0404608	-0.0399306	-0.155766	0.0164224	0.0442412	0.0836845	0.409826	0.0794953	0.383567	0.251321	2.06053	0.0016165	0.0093612	-0.157397	-0.98545	0.142939	0.844998	-0.000677911	-0.0023719	-0.132024	-1.40475
P55265.ESEkTAESQTPTPSATSFFSGK	ADAR	K595k	ADAR.K595k		0.5	0.25		0.5	-0.584963	-0.26967	1.58496	0.740669	1.58496	-1.00815	0.0102653	0.00906025	-0.0501304	-0.0422802	0.0603956	0.0598972	0.0731576	0.345066	-0.179184	-1.19707	-0.155443	-0.965823	0.0973702	0.977914	-0.00813281	-0.0302122	-0.181908	-1.24279	-0.120404	-0.677312	0.0780771	0.64671
P55265.TMScSDkILR	ADAR	K1039k	ADAR.K1039k		0.25	0.5		1	0.584963	0.26967	2.32193	0.740669	2.32193	-0.516764	0.473107	2.06947	0.275492	1.44228	0.197615	0.751702	0.517864	8.023	0.398344	4.7082	0.742072	19.3995	0.046119	0.351563	0.407358	4.99912	0.372568	4.21334	0.50184	7.6318	0.0156311	0.0920933
NA	ADAR	K895k	NA		NA	NA	NA	NA	NA	NA	NA	NA	NA		0.140619	0.527675	-0.0906715	-0.298897	0.231291	0.814056	-0.101058	-0.525741	0.209896	1.53406	-0.0170255	-0.0649124	-0.119986	-1.34499	0.00305404	0.0111116	0.0214393	0.0840361	0.0689768	0.324243	-0.0082605	-0.0465672
P55265.QGkQEAADAALR	ADAR	K781k	ADAR.K781k		1	0.75	1.5	0.5	-0.321928	-0.407821	-1.22239	-1.30255	-1.22239	1.00815	0.189696	1.36884	0.0115977	0.0425851	0.178099	0.917493	0.0201623	0.0778353	0.17873	1.19242	0.299397	2.78376	-0.0611861	-0.507953	0.0964623	0.500164	0.319309	3.17167	0.0865449	0.433389	-0.100125	-0.923175
P55265.GDSLSLkGETVNDcHAEIISR	ADAR	K902k	ADAR.K902k		0.75	1.5	0.25	1	0.807355	1.00815	1.32193	1.23906	1.32193		0.0453326	0.458698	-0.115737	-0.916626	0.16107	1.2429	-0.0829251	-0.405018	0.00616567	0.0225035	-0.119008	-0.657732	-0.0343771	-0.244549	-0.159824	-1.02069	-0.258787	-2.19815	-0.175723	-1.17836	0.0444639	0.308815
P55265.FVYQAkVGGR	ADAR	K763k	ADAR.K763k		2	2.25	2.75	1.5	0.152003	0.195439	-0.777608	-1.0823	-0.777608	1.13397							0.214197	1.58479	0.0619506	0.280528	0.344051	3.57426	0.0587468	0.481135	0.0275483	0.11063	0.030823	0.125386	0.202423	1.46929	-0.00147135	-0.00795821
NA	ADAR	K936k	NA		NA	NA	NA	NA	NA	NA	NA	NA	NA								-0.0341181	-0.139104	0.0439732	0.186184	0.116637	0.639575	-0.0301328	-0.208942	-0.213814	-1.54046	0.116777	0.523594	-0.168887	-0.995269	-0.156283	-1.58767
NA	ADCY3	K428k	NA		NA	NA	NA	NA	NA	NA	NA	NA	NA		-0.0115097	-0.0344646	0.187921	1.03099	-0.199431	-1.11788	-0.166951	-1.07482	-0.0723287	-0.340138	-0.18874	-1.29725	-0.0365115	-0.263064	-0.0500759	-0.2194	-0.244949	-2.00413	-0.0864458	-0.43274	0.0875565	0.760011
NA	ADCY3	K604k	NA		NA	NA	NA	NA	NA	NA	NA	NA	NA		-0.0115097	-0.0344646	0.187921	1.03099	-0.199431	-1.11788	-0.166951	-1.07482	-0.0723287	-0.340138	-0.18874	-1.29725	-0.0365115	-0.263064	-0.0500759	-0.2194	-0.244949	-2.00413	-0.0864458	-0.43274	0.0875565	0.760011
NA	ADCY3	K879k	NA		NA	NA	NA	NA	NA	NA	NA	NA	NA		-0.0115097	-0.0344646	0.187921	1.03099	-0.199431	-1.11788	-0.166951	-1.07482	-0.0723287	-0.340138	-0.18874	-1.29725	-0.0365115	-0.263064	-0.0500759	-0.2194	-0.244949	-2.00413	-0.0864458	-0.43274	0.0875565	0.760011
NA	ADCY3	K1112k	NA		NA	NA	NA	NA	NA	NA	NA	NA	NA		-0.0115097	-0.0344646	0.187921	1.03099	-0.199431	-1.11788	-0.166951	-1.07482	-0.0723287	-0.340138	-0.18874	-1.29725	-0.0365115	-0.263064	-0.0500759	-0.2194	-0.244949	-2.00413	-0.0864458	-0.43274	0.0875565	0.760011
O43306.kPQYDIWGNTVNVSSR	ADCY6	K1101k	ADCY6.K1101k		0.5	0.5	0.75				-2	-1.23906	-2	1.09415							-0.0230003	-0.0897929	0.216651	1.61414	0.137149	0.804244	-0.0924734	-0.90611	0.221634	1.41707	0.0476661	0.185141	0.114624	0.525764	0.0784659	0.550188
O43306.LQATGEkEEMEELQAYNR	ADCY6	K934k	ADCY6.K934k		0.5	0.75	0.25		0.415037	0.171537	-1	-0.407821	-1	0.428266							-0.0446974	-0.189771	-0.102615	-0.536696	-0.183484	-1.24163	0.0223486	0.147742	-0.0200262	-0.0780558	-0.0841739	-0.417983	-0.160879	-1.0308	0.0288216	0.183374
NA	ADCY7	K214k	NA		NA	NA	NA	NA	NA	NA	NA	NA	NA		-0.0115097	-0.0344646	0.187921	1.03099	-0.199431	-1.11788	-0.166951	-1.07482	-0.0723287	-0.340138	-0.18874	-1.29725	-0.0365115	-0.263064	-0.0500759	-0.2194	-0.244949	-2.00413	-0.0864458	-0.43274	0.0875565	0.760011
NA	ADCY7	K316k	NA		NA	NA	NA	NA	NA	NA	NA	NA	NA		-0.0115097	-0.0344646	0.187921	1.03099	-0.199431	-1.11788	-0.166951	-1.07482	-0.0723287	-0.340138	-0.18874	-1.29725	-0.0365115	-0.263064	-0.0500759	-0.2194	-0.244949	-2.00413	-0.0864458	-0.43274	0.0875565	0.760011
NA	ADCY7	K443k	NA		NA	NA	NA	NA	NA	NA	NA	NA	NA		-0.0115097	-0.0344646	0.187921	1.03099	-0.199431	-1.11788	-0.166951	-1.07482	-0.0723287	-0.340138	-0.18874	-1.29725	-0.0365115	-0.263064	-0.0500759	-0.2194	-0.244949	-2.00413	-0.0864458	-0.43274	0.0875565	0.760011
P51828.VFYTEcDVNkEGLEcLR	ADCY7	K899k	ADCY7.K899k		1.5	2	1.5	1.5	0.36257	0.305373				-0.740669	-0.0172943	-0.0285741	0.030623	0.0729832	-0.0479173	-0.0772974	0.0119369	0.0445944	-0.238847	-1.89297	-0.215794	-1.60385	0.096769	0.968955	-0.0484744	-0.211097	-0.152503	-0.951872	0.00654059	0.0241398	0.0467401	0.328689
P51828.kPQYDIWGNTVNVASR	ADCY7	K1006k	ADCY7.K1006k		1.25	0.75	0.5	0.75	-0.584963	-0.396592	0.415037	0.171537	0.415037	-0.639402	0.150353	0.884566	-0.153983	-0.397557	0.304337	0.852184	-0.219581	-1.64956	0.0766136	0.365879	-0.162066	-1.02784	-0.114292	-1.24694	-0.0248918	-0.0989177	-0.00557747	-0.0205041	0.0665261	0.309926	-0.00867794	-0.049044
NA	ADCY9	K699k	NA		NA	NA	NA	NA	NA	NA	NA	NA	NA		-0.0115097	-0.0344646	0.187921	1.03099	-0.199431	-1.11788	-0.166951	-1.07482	-0.0723287	-0.340138	-0.18874	-1.29725	-0.0365115	-0.263064	-0.0500759	-0.2194	-0.244949	-2.00413	-0.0864458	-0.43274	0.0875565	0.760011
O60503.VLSkmGYDFDYR	ADCY9	K1218k	ADCY9.K1218k		1	1	1.75	1.75							-0.0329266	-0.089181	0.0477063	0.177515	-0.0806328	-0.293914	0.110174	0.591197	0.20174	1.44028	0.319184	3.1192	-0.0353321	-0.252782	-0.0162726	-0.0624774	-0.00819687	-0.0304582	0.265733	2.2994	-0.00362841	-0.0198865
O60503.LGQSVVADQLkGLK	ADCY9	K564k	ADCY9.K564k		1	0.5	2	0.75	-0.736966	-0.740669	-1.16993	-1.09906	-1.16993	-0.623013	0.0703553	0.836768	0.0272855	0.224511	0.0430698	0.66272	-0.240159	-1.91022	0.141735	0.843425	-0.257164	-2.14179	-0.14736	-1.87177	-0.337308	-3.50313	-0.0586563	-0.265416	-0.287026	-2.62631	-0.125198	-1.29479
NA	ADD1	K55k	NA		NA	NA	NA	NA	NA	NA	NA	NA	NA		-0.0115097	-0.0344646	0.187921	1.03099	-0.199431	-1.11788	-0.166951	-1.07482	-0.0723287	-0.340138	-0.18874	-1.29725	-0.0365115	-0.263064	-0.0500759	-0.2194	-0.244949	-2.00413	-0.0864458	-0.43274	0.0875565	0.760011
NA	ADD1	K140k	NA		NA	NA	NA	NA	NA	NA	NA	NA	NA		-0.0115097	-0.0344646	0.187921	1.03099	-0.199431	-1.11788	-0.166951	-1.07482	-0.0723287	-0.340138	-0.18874	-1.29725	-0.0365115	-0.263064	-0.0500759	-0.2194	-0.244949	-2.00413	-0.0864458	-0.43274	0.0875565	0.760011
NA	ADD1	K439k	NA		NA	NA	NA	NA	NA	NA	NA	NA	NA		0.0858519	0.489731	0.0567952	0.211185	0.0290567	0.143603	0.0622622	0.282262	0.33656	3.43314	0.312145	2.99723	-0.105842	-1.1085	0.157598	0.999519	-0.0320521	-0.131015	0.213157	1.5958	0.0852101	0.731196
NA	ADD1	K574k	NA		NA	NA	NA	NA	NA	NA	NA	NA	NA		0.0858519	0.489731	0.0567952	0.211185	0.0290567	0.143603	0.0622622	0.282262	0.33656	3.43314	0.312145	2.99723	-0.105842	-1.1085	0.157598	0.999519	-0.0320521	-0.131015	0.213157	1.5958	0.0852101	0.731196
NA	ADD1	K615k	NA		NA	NA	NA	NA	NA	NA	NA	NA	NA		0.029449	0.0639002	-0.142953	-1.03537	0.172402	0.62185	0.227285	1.74468	0.0508294	0.220855	0.284344	2.54368	0.0680883	0.587057	-0.00752425	-0.0278822	0.0375183	0.156658	0.101794	0.537643	-0.0202376	-0.122515
P35611.VLIQkNLGPK	ADD1	K288k	ADD1.K288k		0.75	0.25	0.5	1.5	-1	-0.396592	1.22239	1.30255	1.22239	-2.09432							-0.141852	-0.693957	-0.0507347	-0.192023	-0.245023	-1.7583	-0.0339968	-0.205843	-0.18837	-1.312	0.0157478	0.060335	-0.127016	-0.730326	-0.0917102	-0.812279
Q9UEY8.IQLQkVLGPScK	ADD3	K280k	ADD3.K280k				0.5	1		NA	0.736966	0.740669	0.736966		-0.218114	-1.03431	-0.0320371	-0.0976378	-0.186077	-0.713151	0.134753	0.784117	-0.116877	-0.641402	0.16763	1.08143	0.0970955	0.973815	-0.182403	-1.24803	-0.0258688	-0.103199	-0.218333	-1.65882	-0.0703308	-0.560168
NA	ADD3	K80k	NA		NA	NA	NA	NA	NA	NA	NA	NA	NA		0.029449	0.0639002	-0.142953	-1.03537	0.172402	0.62185	0.227285	1.74468	0.0508294	0.220855	0.284344	2.54368	0.0680883	0.587057	-0.00752425	-0.0278822	0.0375183	0.156658	0.101794	0.537643	-0.0202376	-0.122515
NA	ADD3	K426k	NA		NA	NA	NA	NA	NA	NA	NA	NA	NA		0.029449	0.0639002	-0.142953	-1.03537	0.172402	0.62185	0.227285	1.74468	0.0508294	0.220855	0.284344	2.54368	0.0680883	0.587057	-0.00752425	-0.0278822	0.0375183	0.156658	0.101794	0.537643	-0.0202376	-0.122515
NA	ADD3	K476k	NA		NA	NA	NA	NA	NA	NA	NA	NA	NA		0.029449	0.0639002	-0.142953	-1.03537	0.172402	0.62185	0.227285	1.74468	0.0508294	0.220855	0.284344	2.54368	0.0680883	0.587057	-0.00752425	-0.0278822	0.0375183	0.156658	0.101794	0.537643	-0.0202376	-0.122515
NA	ADD3	K504k	NA		NA	NA	NA	NA	NA	NA	NA	NA	NA								0.232356	1.80889	0.063284	0.287972	0.335756	3.4182	0.065239	0.553821	0.0437592	0.187165	0.212964	1.59348	0.225287	1.74558	-0.0760237	-0.623246
Q14246.LSSVNAEVSTLkDTR	ADGRE1	K791k	ADGRE1.K791k		1	1	0.75	1.5			0.807355	1.00815	0.807355	-0.72205	0.306207	1.81758	-0.0301663	-0.228814	0.336373	2.09138	0.0873687	0.433457	-0.342864	-3.55167	-0.175219	-1.15671	0.166012	2.28631	-0.189751	-1.32705	-0.0553196	-0.247213	-0.0444062	-0.190403	-0.0604002	-0.456953
NA	ADGRE5	K730k	NA		NA	NA	NA	NA	NA	NA	NA	NA	NA								0.358028	3.84718	0.0225237	0.0877669	0.490118	7.13737	0.12946	1.51673	0.215134	1.61972	0.054823	0.244537	0.183944	1.2644	0.0720281	0.578672
Q9Y653.GGPSPLkSNSDSAR	ADGRG1	K673k	ADGRG1.K673k		1.75	2.25	2	0.75	0.321928	0.311533	-1.16993	-1.32006	-1.16993	1.57661	0.0703553	0.836768	0.0272855	0.224511	0.0430698	0.66272	-0.240159	-1.91022	0.141735	0.843425	-0.257164	-2.14179	-0.14736	-1.87177	-0.337308	-3.50313	-0.0586563	-0.265416	-0.287026	-2.62631	-0.125198	-1.29479
Q86SQ4.LADNSDWSkTATNIIK	ADGRG6	K1144k	ADGRG6.K1144k				0.5	0.75		NA	0.415037	0.26967	0.415037	-0.407821	-0.110666	-0.591656	-0.0427744	-0.277599	-0.0678918	-0.306704	0.148521	0.903019	0.191411	1.326	0.34677	3.62636	-0.0165497	-0.10551	0.132031	0.771745	0.111857	0.611437	0.0760777	0.366974	0.00906422	0.0513466
Q86SQ4.NYETVPcDSTISkVIPGnGK	ADGRG6	K283k	ADGRG6.K283k		0.25	0.25	0.5				-1.58496	-0.740669	-1.58496	0.855968	-0.124901	-1.16173	-0.135073	-2.07477	0.0101718	0.0786176	-0.0407226	-0.170299	-0.230318	-1.78293	-0.202826	-1.45258	0.0731583	0.648245	-0.169377	-1.11406	-0.0892774	-0.45141	-0.112788	-0.618467	-0.0359888	-0.238469
Q86SQ4.SLSSSSIGSNSTYLTSKSk	ADGRG6	K1178k	ADGRG6.K1178k		1	1	2.5	1.5			-0.652077	-0.834908	-0.652077	-0.758791	-0.119896	-1.83393	-0.186765	-1.94005	0.0668692	1.03501	0.0741626	0.351073	-0.0243837	-0.0957134	0.132636	0.766533	0.0380256	0.276448	-0.109722	-0.595445	0.272754	2.40441	-0.0398894	-0.168093	-0.171847	-2.16358
NA	ADH1B	K114k	NA		NA	NA	NA	NA	NA	NA	NA	NA	NA		-0.0299497	-0.108105	-0.0644397	-0.522125	0.03449	0.145786	0.017017	0.0648778	0.132446	0.764965	0.193889	1.35296	-0.04454	-0.33643	0.353902	3.82704	0.129464	0.750413	0.286684	2.62087	0.10084	0.932905
NA	ADH1B	K6k	NA		NA	NA	NA	NA	NA	NA	NA	NA	NA								0.358028	3.84718	0.0225237	0.0877669	0.490118	7.13737	0.12946	1.51673	0.215134	1.61972	0.054823	0.244537	0.183944	1.2644	0.0720281	0.578672
NA	ADH1B	K19k	NA		NA	NA	NA	NA	NA	NA	NA	NA	NA								0.358028	3.84718	0.0225237	0.0877669	0.490118	7.13737	0.12946	1.51673	0.215134	1.61972	0.054823	0.244537	0.183944	1.2644	0.0720281	0.578672
NA	ADH1B	K100k	NA		NA	NA	NA	NA	NA	NA	NA	NA	NA								0.358028	3.84718	0.0225237	0.0877669	0.490118	7.13737	0.12946	1.51673	0.215134	1.61972	0.054823	0.244537	0.183944	1.2644	0.0720281	0.578672
NA	ADH1B	K105k	NA		NA	NA	NA	NA	NA	NA	NA	NA	NA								0.358028	3.84718	0.0225237	0.0877669	0.490118	7.13737	0.12946	1.51673	0.215134	1.61972	0.054823	0.244537	0.183944	1.2644	0.0720281	0.578672
NA	ADH1B	K169k	NA		NA	NA	NA	NA	NA	NA	NA	NA	NA								0.0515528	0.224607	-0.121392	-0.676226	0.0849491	0.41788	0.0667335	0.571152	0.0234377	0.0894099	-0.246526	-2.00008	-0.135698	-0.765956	0.120925	1.21106
NA	ADH1B	K234k	NA		NA	NA	NA	NA	NA	NA	NA	NA	NA								0.0515528	0.224607	-0.121392	-0.676226	0.0849491	0.41788	0.0667335	0.571152	0.0234377	0.0894099	-0.246526	-2.00008	-0.135698	-0.765956	0.120925	1.21106
NA	ADH1B	K248k	NA		NA	NA	NA	NA	NA	NA	NA	NA	NA								0.0515528	0.224607	-0.121392	-0.676226	0.0849491	0.41788	0.0667335	0.571152	0.0234377	0.0894099	-0.246526	-2.00008	-0.135698	-0.765956	0.120925	1.21106
NA	ADH1B	K316k	NA		NA	NA	NA	NA	NA	NA	NA	NA	NA								0.0515528	0.224607	-0.121392	-0.676226	0.0849491	0.41788	0.0667335	0.571152	0.0234377	0.0894099	-0.246526	-2.00008	-0.135698	-0.765956	0.120925	1.21106
NA	ADH1B	K324k	NA		NA	NA	NA	NA	NA	NA	NA	NA	NA								0.0515528	0.224607	-0.121392	-0.676226	0.0849491	0.41788	0.0667335	0.571152	0.0234377	0.0894099	-0.246526	-2.00008	-0.135698	-0.765956	0.120925	1.21106
NA	ADH1B	K339k	NA		NA	NA	NA	NA	NA	NA	NA	NA	NA								0.201781	1.44075	0.0388477	0.161297	0.330816	3.32732	0.0628705	0.526817	-0.00881911	-0.0328536	-0.0515018	-0.226867	-0.0197902	-0.0770632	0.0191773	0.115376
NA	ADH1B	K367k	NA		NA	NA	NA	NA	NA	NA	NA	NA	NA								0.201781	1.44075	0.0388477	0.161297	0.330816	3.32732	0.0628705	0.526817	-0.00881911	-0.0328536	-0.0515018	-0.226867	-0.0197902	-0.0770632	0.0191773	0.115376
NA	ADH1C	K169k	NA		NA	NA	NA	NA	NA	NA	NA	NA	NA								0.0217436	0.020779	-0.593204	-1.52668	-0.504267	-0.982961	0.30879	0.912986	-0.0990595	-0.131226	-0.288449	-0.312002	-0.32074	-0.646669	0.0340501	0.0487581
P11766.LkAGDTVIPLYIPQcGEcK	ADH5	K84k	ADH5.K84k		1.25	1	0.25	0.25	-0.263034	-0.195439				-0.407821	0.154302	1.58933	0.194447	1.35012	-0.0401449	-0.237721	0.0752148	0.357403	0.251284	2.06002	0.225936	1.72781	-0.067939	-0.585296	0.281342	2.53657	0.195415	1.38969	0.12881	0.745021	0.0386067	0.25959
P11766.LVSEYMSkK	ADH5	K338k	ADH5.K338k		1.25	0.25		1.25	-1.58496	-1.52259	2.58496	1.81269	2.58496	-3.15083	0.151853	1.3468	0.166544	0.613035	-0.0146904	-0.111246
P11766.AkEFGATEcINPQDFSK	ADH5	K233k	ADH5.K233k		1	0.75		0.5	-0.321928	-0.204865	1.58496	0.740669	1.58496	-1.00815	0.0102653	0.00906025	-0.0501304	-0.0422802	0.0603956	0.0598972	0.0731576	0.345066	-0.179184	-1.19707	-0.155443	-0.965823	0.0973702	0.977914	-0.00813281	-0.0302122	-0.181908	-1.24279	-0.120404	-0.677312	0.0780771	0.64671
NA	ADH5	K120k	NA		NA	NA	NA	NA	NA	NA	NA	NA	NA		0.276733	0.628402	0.187696	0.769105	0.0890374	0.182918	-0.127294	-0.722991	0.210362	1.53951	0.0975114	0.501149	-0.13029	-1.5323	-0.317765	-3.14417	-0.0523476	-0.231331	-0.230068	-1.80664	-0.119252	-1.20093
NA	ADH5	K315k	NA		NA	NA	NA	NA	NA	NA	NA	NA	NA		0.276733	0.628402	0.187696	0.769105	0.0890374	0.182918	-0.127294	-0.722991	0.210362	1.53951	0.0975114	0.501149	-0.13029	-1.5323	-0.317765	-3.14417	-0.0523476	-0.231331	-0.230068	-1.80664	-0.119252	-1.20093
P11766.AAVAWEAGkPLSIEEIEVAPPK	ADH5	K18k	ADH5.K18k		0.25	1			1.32193	0.748885		NA		-0.786465	-0.0237424	-0.100203	-0.0916593	-1.21414	0.0679169	0.683594	0.269308	2.31643	0.210029	1.53562	0.452947	6.06739	0.0228737	0.151706	-0.138425	-0.826083	0.264871	2.2867	0.0921496	0.470661	-0.181201	-2.36784
P11766.GTAFGGWkSVESVPK	ADH5	K323k	ADH5.K323k		1.25	0.75	1.75	1.25	-0.584963	-0.396592	-0.415037	-0.311533	-0.415037		0.419716	0.354486	-0.317677	-0.256454	0.737393	0.686672
NA	ADH5	K7k	NA		NA	NA	NA	NA	NA	NA	NA	NA	NA								-0.228175	-1.75585	-0.27206	-2.3571	-0.482029	-6.89364	0.0169339	0.108222	-0.238673	-1.91944	0.0701448	0.331144	-0.249176	-2.06232	-0.138752	-1.52255
NA	ADH5	K113k	NA		NA	NA	NA	NA	NA	NA	NA	NA	NA								-0.228175	-1.75585	-0.27206	-2.3571	-0.482029	-6.89364	0.0169339	0.108222	-0.238673	-1.91944	0.0701448	0.331144	-0.249176	-2.06232	-0.138752	-1.52255
NA	ADH7	K188k	NA		NA	NA	NA	NA	NA	NA	NA	NA	NA		-0.110376	-0.316881	0.00677995	0.03798	-0.117156	-0.479872	0.229666	1.77467	0.111915	0.604066	0.225208	1.71875	0.0454358	0.344986	0.0671197	0.313373	0.104825	0.559449	0.15207	0.947879	-0.0169412	-0.100589
NA	ADH7	K205k	NA		NA	NA	NA	NA	NA	NA	NA	NA	NA		-0.110376	-0.316881	0.00677995	0.03798	-0.117156	-0.479872	0.229666	1.77467	0.111915	0.604066	0.225208	1.71875	0.0454358	0.344986	0.0671197	0.313373	0.104825	0.559449	0.15207	0.947879	-0.0169412	-0.100589
NA	ADH7	K373k	NA		NA	NA	NA	NA	NA	NA	NA	NA	NA								0.154594	0.958012	-0.0481063	-0.206894	0.129437	0.740321	0.0782152	0.711926	0.0657448	0.299416	-0.00676845	-0.0247104	0.169951	1.09686	0.0326886	0.208316
Q9BV57.FTVDEkNYTK	ADI1	K140k	ADI1.K140k		1.25	0.75	0.25	0.25	-0.584963	-0.396592				-0.683964	0.136005	1.04648	0.115435	0.809985	0.02057	0.13176	-0.183291	-1.23962	-0.0906612	-0.455005	-0.370599	-4.10362	-0.0357426	-0.256347	-0.261677	-2.23996	0.109572	0.594324	-0.0441942	-0.189341	-0.166802	-2.05777
Q9BV57.IFMEkGDMVTLPAGIYHR	ADI1	K121k	ADI1.K121k		0.25	0.75	0.25		1	0.396592	-1	-0.407821	-1	0.667218							-0.210203	-1.53766	-0.0348347	-0.14242	-0.259214	-2.17072	-0.0676688	-0.582112	0.0178313	0.0688923	0.33708	3.49882	0.267446	2.32478	-0.143439	-1.60588
NA	ADIPOR1	K126k	NA		NA	NA	NA	NA	NA	NA	NA	NA	NA		0.273734	0.519833	-0.0910997	-0.234301	0.364834	0.680981	0.0336561	0.136975	0.122508	0.684957	0.16546	1.06037	-0.0342848	-0.243757	0.0438661	0.187699	-0.190989	-1.34061	-0.11585	-0.641844	0.10552	0.997861
NA	ADIPOR1	K37k	NA		NA	NA	NA	NA	NA	NA	NA	NA	NA								-0.101102	-0.317975	0.021718	0.0640779	0.0272268	0.0733196	-0.0439898	-0.222483	-0.170439	-0.252572	0.388009	1.01903	0.148123	0.241732	-0.26998	-0.941868
NA	ADIPOR1	K86k	NA		NA	NA	NA	NA	NA	NA	NA	NA	NA								-0.101102	-0.317975	0.021718	0.0640779	0.0272268	0.0733196	-0.0439898	-0.222483	-0.170439	-0.252572	0.388009	1.01903	0.148123	0.241732	-0.26998	-0.941868
Q86V24.MEEFVckVWEGR	ADIPOR2	K97k	ADIPOR2.K97k		1	0.5			-0.736966	-0.443709		NA		-0.740669							-0.0629788	-0.0640443	0.274853	0.500078	0.40706	0.874173	-0.147251	-0.356584	0.738537	0.436641	-0.698569	-1.07974	-0.567554	-0.575922	0.477543	0.971456
NA	ADIRF	K4k	NA		NA	NA	NA	NA	NA	NA	NA	NA	NA		0.0407027	0.336095	0.124536	0.944463	-0.0838329	-0.591352	0.124932	0.704105	-0.0900521	-0.450988	-0.00384257	-0.0138928	0.0829551	0.774056	-0.0412922	-0.174948	-0.1014	-0.534837	0.0298844	0.121121	0.0270066	0.170046
NA	ADIRF	K70k	NA		NA	NA	NA	NA	NA	NA	NA	NA	NA		-0.763543	-0.468362	0.241123	0.114749	-1.00467	-0.568151	0.121568	0.677604	0.139874	0.827419	0.323659	3.1983	-0.0070636	-0.0423846	0.150191	0.930627	0.104701	0.558549	0.0892926	0.451511	0.0204386	0.123877
NA	ADIRF	K48k	NA		NA	NA	NA	NA	NA	NA	NA	NA	NA								0.0449277	0.189765	-0.0690849	-0.319893	-0.051019	-0.219571	0.0437922	0.328709	0.0688294	0.305027	0.140904	0.78628	0.221447	1.54355	-0.0310589	-0.191505
P55263.TGcTFPEkPDFH	ADK	K358k	ADK.K358k		1.25	0.5			-1	-1.00815		NA		-1.09415	-0.267828	-0.779771	-0.0144731	-0.0401256	-0.253355	-0.672263	-0.19496	-1.36471	-0.0716863	-0.336336	-0.320868	-3.14883	-0.0475673	-0.365648	-0.0738682	-0.353478	-0.220229	-1.68224	-0.142063	-0.857776	0.0657601	0.511597
NA	ADK	K111k	NA		NA	NA	NA	NA	NA	NA	NA	NA	NA		-0.763543	-0.468362	0.241123	0.114749	-1.00467	-0.568151	0.121568	0.677604	0.139874	0.827419	0.323659	3.1983	-0.0070636	-0.0423846	0.150191	0.930627	0.104701	0.558549	0.0892926	0.451511	0.0204386	0.123877
P55263.EQGFETkDIK	ADK	K256k	ADK.K256k		0.5	0.5						NA			-0.0329266	-0.089181	0.0477063	0.177515	-0.0806328	-0.293914	0.110174	0.591197	0.20174	1.44028	0.319184	3.1192	-0.0353321	-0.252782	-0.0162726	-0.0624774	-0.00819687	-0.0304582	0.265733	2.2994	-0.00362841	-0.0198865
P55263.SLIANLAAANcYKk	ADK	K163k	ADK.K163k		1.75	0.25	1.5	0.75	-2	-2.26568	-0.807355	-0.466885	-0.807355	-1.10712	0.159363	0.881302	0.172183	0.807144	-0.0128196	-0.197597	-0.337605	-3.45262	-0.0593037	-0.265935	-0.389999	-4.52063	-0.107387	-1.13319	-0.224414	-1.73456	0.165015	1.07093	-0.154757	-0.972807	-0.174971	-2.23063
P55263.YSLkPNDQILAEDK	ADK	K51k	ADK.K51k		0.5	0.25		0.5	-0.584963	-0.26967	1.58496	0.407821	1.58496	-0.611516	0.170717	1.03682	0.00730321	0.0451146	0.163414	1.3086	0.0502963	0.218102	0.337329	3.44747	0.374037	4.17563	-0.110756	-1.188	0.0312686	0.127421	0.239156	1.92589	0.15201	0.947321	-0.0934039	-0.834058
Q6IQ32.IDVASFFGkR	ADNP2	K1093k	ADNP2.K1093k		0.25	0.25	0.5	1.25			1	0.623013	1	-0.639402							-0.178189	-1.13708	-0.157127	-0.953069	-0.311105	-2.96518	-0.00719294	-0.0416631	-0.0706982	-0.307602	-0.0962747	-0.472088	-0.00737916	-0.0259048	0.0136215	0.074086
Q9BRR6.IVLNPNkPVVEWHR	ADPGK	K450k	ADPGK.K450k		1.25	0.75		0.25	-0.584963	-0.396592	1	0.407821	1	-0.639402	-0.41882	-0.704035	-0.383896	-0.719796	-0.0349237	-0.0324824	-0.216483	-1.61212	-0.0573803	-0.255485	-0.358123	-3.84907	-0.0613925	-0.51025	-0.118568	-0.662912	0.0120136	0.0453389	-0.171494	-1.13531	-0.0586704	-0.439844
Q9BRR6.NDLEEAFIHFMGkGAAAER	ADPGK	K125k	ADPGK.K125k		0.5	0.25	0.25		-0.584963	-0.26967	-1	-0.407821	-1		0.119632	0.219339	0.111281	0.146722	0.0083512	0.0336592	-0.0753059	-0.256845	0.093924	0.308189	-0.0486708	-0.153909	-0.0714732	-0.392911	-0.00888063	-0.0248385	-0.0950631	-0.312602	-0.212301	-1.0624	0.0351728	0.161215
Q9NX46.ALVQSLLAkEAFDEVDMAHR	ADPRS	K92k	ADPRS.K92k		0.5	0.25		0.25	-0.584963	-0.26967	1	0.407821	1	-0.683964							0.162709	0.434268	-0.44514	-2.0969	-0.238516	-0.713729	0.204858	1.37819	0.154845	0.285214	-0.183823	-0.33038	0.00634657	0.00609664	0.120075	0.384936
NA	ADRM1	K62k	NA		NA	NA	NA	NA	NA	NA	NA	NA	NA		-0.763543	-0.468362	0.241123	0.114749	-1.00467	-0.568151	0.121568	0.677604	0.139874	0.827419	0.323659	3.1983	-0.0070636	-0.0423846	0.150191	0.930627	0.104701	0.558549	0.0892926	0.451511	0.0204386	0.123877
NA	ADRM1	K379k	NA		NA	NA	NA	NA	NA	NA	NA	NA	NA		-0.763543	-0.468362	0.241123	0.114749	-1.00467	-0.568151	0.121568	0.677604	0.139874	0.827419	0.323659	3.1983	-0.0070636	-0.0423846	0.150191	0.930627	0.104701	0.558549	0.0892926	0.451511	0.0204386	0.123877
NA	ADRM1	K386k	NA		NA	NA	NA	NA	NA	NA	NA	NA	NA		-0.763543	-0.468362	0.241123	0.114749	-1.00467	-0.568151	0.121568	0.677604	0.139874	0.827419	0.323659	3.1983	-0.0070636	-0.0423846	0.150191	0.930627	0.104701	0.558549	0.0892926	0.451511	0.0204386	0.123877
NA	ADRM1	K390k	NA		NA	NA	NA	NA	NA	NA	NA	NA	NA		-0.763543	-0.468362	0.241123	0.114749	-1.00467	-0.568151	0.121568	0.677604	0.139874	0.827419	0.323659	3.1983	-0.0070636	-0.0423846	0.150191	0.930627	0.104701	0.558549	0.0892926	0.451511	0.0204386	0.123877
NA	ADRM1	K395k	NA		NA	NA	NA	NA	NA	NA	NA	NA	NA		-0.763543	-0.468362	0.241123	0.114749	-1.00467	-0.568151	0.121568	0.677604	0.139874	0.827419	0.323659	3.1983	-0.0070636	-0.0423846	0.150191	0.930627	0.104701	0.558549	0.0892926	0.451511	0.0204386	0.123877
NA	ADRM1	K398k	NA		NA	NA	NA	NA	NA	NA	NA	NA	NA		-0.763543	-0.468362	0.241123	0.114749	-1.00467	-0.568151	0.121568	0.677604	0.139874	0.827419	0.323659	3.1983	-0.0070636	-0.0423846	0.150191	0.930627	0.104701	0.558549	0.0892926	0.451511	0.0204386	0.123877
Q16186.GASNkYLVEFR	ADRM1	K21k	ADRM1.K21k		1	0.75	0.25		-0.321928	-0.195439	-1	-0.407821	-1		0.119632	0.219339	0.111281	0.146722	0.0083512	0.0336592	-0.0753059	-0.256845	0.093924	0.308189	-0.0486708	-0.153909	-0.0714732	-0.392911	-0.00888063	-0.0248385	-0.0950631	-0.312602	-0.212301	-1.0624	0.0351728	0.161215
Q16186.mSLkGTTVTPDK	ADRM1	K34k	ADRM1.K34k		17	15.5	30.75	19.5	-0.131245	-0.275258	-0.650416	-3.56723	-0.650416	2.03631	0.0249363	0.103695	0.0169142	0.0495571	0.00802216	0.037588	0.0553155	0.24441	0.133132	0.770638	0.0595725	0.267406	-0.0300267	-0.208072	-0.0532797	-0.236278	0.121221	0.683767	-0.0808205	-0.396556	-0.0784032	-0.650472
Q16186.MSLkGTTVTPDKR	ADRM1	K34k	ADRM1.K34k		11.75	15.75	37	23.75	0.415037	1.04564	-0.634206	-0.681848	-0.634206	1.10018	0.0249363	0.103695	0.0169142	0.0495571	0.00802216	0.037588	0.0553155	0.24441	0.133132	0.770638	0.0595725	0.267406	-0.0300267	-0.208072	-0.0532797	-0.236278	0.121221	0.683767	-0.0808205	-0.396556	-0.0784032	-0.650472
Q16186.TSGNVEDDLIIFPDDcEFkR	ADRM1	K83k	ADRM1.K83k		1.25	1	2.5	1.75	-0.263034	-0.151697	-0.459432	-0.611516	-0.459432	-0.462985	0.0650742	0.699755	-0.0150912	-0.0956306	0.0801653	0.602124	0.37645	4.22663	0.147295	0.892106	0.527369	8.34505	0.0884231	0.848715	0.22069	1.68796	0.127168	0.731566	0.223453	1.72247	0.0420198	0.28794
P30566.VLSQQAASVVkQEGGDNDLIER	ADSL	K415k	ADSL.K415k	ADSL	5.25	4.25	5.75	4	-0.289507	-0.888034	-0.4975	-1.16176	-0.4975	0.667218	0.115912	0.859543	0.271919	0.953349	-0.156008	-0.547527	-0.2404	-1.9134	0.0974163	0.500496	-0.197421	-1.39189	-0.130352	-1.53347	-0.169556	-1.11586	0.112073	0.613065	0.0279122	0.112253	-0.126536	-1.31642
P30566.NALDLLLPkLAR	ADSL	K134k	ADSL.K134k	ADSL	1	0.5		0.75	-0.736966	-0.443709	2	1.23906	2	-1.75778	0.0320292	0.311108	0.0981162	0.584926	-0.066087	-0.32266
P30566.MVTEkAGFK	ADSL	K229k	ADSL.K229k	ADSL	1.5	1.5	1.75	1.25			-0.415037	-0.258053	-0.415037	-0.384418	-0.12797	-1.88913	-0.103049	-1.17189	-0.0249213	-0.279967	0.0479462	0.206081	0.00369411	0.013348	0.0860114	0.424692	0.0170754	0.109223	-0.0385493	-0.161607	-0.113208	-0.621655	-0.0574449	-0.258761	0.0335442	0.219232
P30566.GTTGTQASFLQLFEGDDHkVEQLDK	ADSL	K218k	ADSL.K218k	ADSL	1.5	0.5	0.5	1.25	-1.22239	-1.30255	1	0.623013	1	-1.57732	-0.223497	-0.981187	-0.219506	-2.02728	-0.00399155	-0.182123	-0.223572	-1.69847	-0.0740492	-0.350394	-0.35216	-3.73106	-0.0576958	-0.469761	0.057572	0.259457	0.126807	0.728627	0.0929223	0.475894	-0.0311075	-0.200516
P30566.EMEEPFEkQQIGSSAmPYK	ADSL	K284k	ADSL.K284k	ADSL	2.75	1.5	0.25	1	-0.777608	-0.761103	1.32193	0.526047	1.32193	-1.39347	-0.110878	-0.598918	-0.0981867	-0.473478	-0.0126917	-0.046569	0.133555	0.774146	0.183488	1.24168	0.392315	4.57219	-0.0192674	-0.124951	0.0765411	0.369827	0.0353691	0.146457	0.180183	1.22465	0.0184986	0.11085
P30566.LLANLkEMEEPFEK	ADSL	K276k	ADSL.K276k	ADSL	2.5	2.75	2.75	2.75	0.125531	0.26967				-0.177285	0.128911	1.28481	0.155586	0.794359	-0.0266747	-0.026501	-0.314105	-3.03091	0.20333	1.45831	-0.113431	-0.615367	-0.19966	-3.15859	-0.144902	-0.882897	-0.0469008	-0.203025	-0.130023	-0.755036	-0.0440321	-0.305092
P30566.ASLPTLGFTHFQPAQLTTVGkR	ADSL	K170k	ADSL.K170k	ADSL	1.5	1	1.5	0.75	-0.485427	-0.443709	-0.807355	-0.611516	-0.807355	-0.204865	0.22195	1.22877	0.131987	0.598747	0.0899625	0.292675	-0.22855	-1.76058	-0.0873768	-0.433509	-0.397776	-4.69528	-0.0544739	-0.435568	-0.0210035	-0.0821849	0.0515349	0.227042	-0.0619388	-0.28371	-0.0325915	-0.21186
NA	ADSS	K118k	NA		NA	NA	NA	NA	NA	NA	NA	NA	NA		-0.0545031	-0.439048	-0.0977646	-0.513398	0.0432615	0.15429	-0.118869	-0.656665	0.364487	3.97761	0.0686046	0.318305	-0.186511	-2.79777	-0.0595854	-0.270555	0.101969	0.538889	0.0981364	0.511812	-0.0725864	-0.584815
NA	ADSS	K157k	NA		NA	NA	NA	NA	NA	NA	NA	NA	NA		-0.0545031	-0.439048	-0.0977646	-0.513398	0.0432615	0.15429	-0.118869	-0.656665	0.364487	3.97761	0.0686046	0.318305	-0.186511	-2.79777	-0.0595854	-0.270555	0.101969	0.538889	0.0981364	0.511812	-0.0725864	-0.584815
NA	ADSS	K164k	NA		NA	NA	NA	NA	NA	NA	NA	NA	NA		-0.0545031	-0.439048	-0.0977646	-0.513398	0.0432615	0.15429	-0.118869	-0.656665	0.364487	3.97761	0.0686046	0.318305	-0.186511	-2.79777	-0.0595854	-0.270555	0.101969	0.538889	0.0981364	0.511812	-0.0725864	-0.584815
NA	ADSS	K173k	NA		NA	NA	NA	NA	NA	NA	NA	NA	NA		-0.0545031	-0.439048	-0.0977646	-0.513398	0.0432615	0.15429	-0.118869	-0.656665	0.364487	3.97761	0.0686046	0.318305	-0.186511	-2.79777	-0.0595854	-0.270555	0.101969	0.538889	0.0981364	0.511812	-0.0725864	-0.584815
NA	ADSS	K419k	NA		NA	NA	NA	NA	NA	NA	NA	NA	NA		-0.0545031	-0.439048	-0.0977646	-0.513398	0.0432615	0.15429	-0.118869	-0.656665	0.364487	3.97761	0.0686046	0.318305	-0.186511	-2.79777	-0.0595854	-0.270555	0.101969	0.538889	0.0981364	0.511812	-0.0725864	-0.584815
P30520.FIEDELQIPVkWIGVGK	ADSS2	K441k	ADSS2.K441k		0.5	0.5		0.5			1.58496	0.740669	1.58496	-0.574189	0.0959082	0.289736	0.300706	1.0493	-0.204797	-0.805065	0.0133604	0.050198	0.0484233	0.208506	0.12528	0.706873	-0.0135296	-0.0846222	-0.106197	-0.569437	0.117361	0.65352	0.008546	0.0318007	-0.100445	-0.927519
P30520.VEVQYkTLPGWNTDISNAR	ADSS2	K403k	ADSS2.K403k		2.75	2.75	2	1			-0.847997	-1.88194	-0.847997	1.55271	0.143434	0.796178	0.205704	0.922079	-0.0622702	-0.233742	-0.261485	-2.20302	-0.0690948	-0.32115	-0.340945	-3.51532	-0.0742367	-0.661602	-0.250753	-2.08428	-0.0667815	-0.311407	-0.22097	-1.69144	-0.0826587	-0.700441
P30520.KGIGPVYSSkAAR	ADSS2	K173k	ADSS2.K173k		0.75	0.5	0.25	0.25	-0.415037	-0.26967				-0.26967	0.15172	1.09277	0.132755	0.696527	0.0189643	0.10742	0.400406	4.75535	-0.181339	-1.2193	0.322869	3.18424	0.224476	3.91432	-0.0996845	-0.522681	0.0823597	0.406338	0.104973	0.56052	-0.0817926	-0.690137
P30520.GIGPVYSSkAAR	ADSS2	K173k	ADSS2.K173k		1.25	2	1.75	1.75	0.584963	0.278188				-0.298723	0.245443	1.25957	0.200464	0.771093	0.0449788	0.253026	0.359062	3.86788	0.0987936	0.509985	0.405028	4.86215	0.100429	1.02412	0.0208839	0.0816781	-0.158167	-1.00491	0.160729	1.02936	0.0804477	0.674273
P30520.AFkELPVNAQNYVR	ADSS2	K419k	ADSS2.K419k		3	3.75	3	3.25	0.29956	0.553925	0.106915	0.10742	0.106915	-0.311533	0.170877	0.711074	0.0453874	0.103008	0.12549	0.388817	0.122386	0.683999	0.37363	4.16706	0.406909	4.90606	-0.0969468	-0.9716	0.189859	1.32823	0.0940573	0.483623	0.271449	2.38469	0.0430437	0.296627
P30520.QEQAGkNLGTTK	ADSS2	K157k	ADSS2.K157k		0.75	0.5		0.5	-0.415037	-0.170176	1.58496	0.740669	1.58496	-0.59718							-0.0245135	-0.0962722	0.152348	0.937488	0.110038	0.590195	-0.0682449	-0.588907	-0.0541629	-0.240995	0.100281	0.526893	0.0626517	0.287734	-0.0693917	-0.550039
P30520.GkVVDLLAQDADIVcR	ADSS2	K45k	ADSS2.K45k		1.75	0.75	0.25	1.5	-1	-0.888034	1.80735	1.75778	1.80735	-2.94305							-0.291819	-2.6613	-0.167519	-1.08035	-0.395434	-4.64223	-0.0479632	-0.369533	-0.00726944	-0.0248006	-0.283248	-2.28781	-0.116603	-0.4916	0.113692	1.07429
P30520.kGIGPVYSSK	ADSS2	K164k	ADSS2.K164k		1.5	0.5			-1.22239	-1.30255		NA		-1.39234							-0.201616	-1.43888	-0.213704	-1.57893	-0.379399	-4.28953	0.00466428	0.0275549	0.103089	0.546911	-0.0272392	-0.109256	-0.0329785	-0.135291	0.0585564	0.438726
NA	AES	K121k	NA		NA	NA	NA	NA	NA	NA	NA	NA	NA		-0.202003	-0.949919	0.110676	0.286981	-0.312679	-1.25372	-0.199028	-1.19699	0.084364	0.408714	-0.163974	-0.901612	-0.106769	-1.02152	-0.136826	-0.609996	0.011493	0.036053	-0.0741066	-0.264233	-0.0635965	-0.38762
NA	AES	K179k	NA		NA	NA	NA	NA	NA	NA	NA	NA	NA		-0.202003	-0.949919	0.110676	0.286981	-0.312679	-1.25372	-0.199028	-1.19699	0.084364	0.408714	-0.163974	-0.901612	-0.106769	-1.02152	-0.136826	-0.609996	0.011493	0.036053	-0.0741066	-0.264233	-0.0635965	-0.38762
NA	AES	K97k	NA		NA	NA	NA	NA	NA	NA	NA	NA	NA		-0.0545031	-0.439048	-0.0977646	-0.513398	0.0432615	0.15429	-0.118869	-0.656665	0.364487	3.97761	0.0686046	0.318305	-0.186511	-2.79777	-0.0595854	-0.270555	0.101969	0.538889	0.0981364	0.511812	-0.0725864	-0.584815
NA	AES	K116k	NA		NA	NA	NA	NA	NA	NA	NA	NA	NA		-0.0545031	-0.439048	-0.0977646	-0.513398	0.0432615	0.15429	-0.118869	-0.656665	0.364487	3.97761	0.0686046	0.318305	-0.186511	-2.79777	-0.0595854	-0.270555	0.101969	0.538889	0.0981364	0.511812	-0.0725864	-0.584815
NA	AFAP1L2	K64k	NA		NA	NA	NA	NA	NA	NA	NA	NA	NA		-0.0225345	-0.100307	-0.108806	-0.822233	0.0862714	0.64985	-0.0678951	-0.314202	-0.169528	-1.10002	-0.226124	-1.73016	0.0392167	0.287123	-0.0499731	-0.218864	-0.121354	-0.684824	-0.0459238	-0.198056	0.0320717	0.207867
NA	AFDN	K295k	NA		NA	NA	NA	NA	NA	NA	NA	NA	NA		-0.0299752	-0.126527	0.079962	0.463629	-0.109937	-0.552961	-0.256148	-2.12753	-0.0639475	-0.2917	-0.373864	-4.17198	-0.0741637	-0.660694	-0.22997	-1.80536	-0.0896622	-0.453971	-0.2787	-2.49548	-0.0630402	-0.483558
NA	AFDN	K972k	NA		NA	NA	NA	NA	NA	NA	NA	NA	NA		-0.0299752	-0.126527	0.079962	0.463629	-0.109937	-0.552961	-0.256148	-2.12753	-0.0639475	-0.2917	-0.373864	-4.17198	-0.0741637	-0.660694	-0.22997	-1.80536	-0.0896622	-0.453971	-0.2787	-2.49548	-0.0630402	-0.483558
NA	AFDN	K217k	NA		NA	NA	NA	NA	NA	NA	NA	NA	NA
NA	AFDN	K274k	NA		NA	NA	NA	NA	NA	NA	NA	NA	NA								-0.0140977	-0.0531248	0.0584071	0.261048	-0.0597847	-0.268569	-0.0279771	-0.191467	-0.0915261	-0.466454	0.0890045	0.449597	-0.123853	-0.704742	-0.0811125	-0.682094
NA	AFF1	K335k	NA		NA	NA	NA	NA	NA	NA	NA	NA	NA		-0.306855	-2.29924	-0.268472	-1.903	-0.0383826	-0.19179	0.199277	1.41258	0.14653	0.885329	0.401271	4.77521	0.0203536	0.132894	0.192014	1.35189	0.253586	2.12403	0.226125	1.75619	-0.0276643	-0.174847
NA	AFF1	K331k	NA		NA	NA	NA	NA	NA	NA	NA	NA	NA		0.0680753	0.117039	-0.0613333	-0.120895	0.129409	0.27913	-0.220407	-1.65961	-0.0637426	-0.290547	-0.297854	-2.75855	-0.0604514	-0.499813	-0.09179	-0.468233	-0.0772396	-0.374143	-0.0885995	-0.446912	-0.00653749	-0.0364714
NA	AFF4	K299k	NA		NA	NA	NA	NA	NA	NA	NA	NA	NA		-0.306855	-2.29924	-0.268472	-1.903	-0.0383826	-0.19179	0.199277	1.41258	0.14653	0.885329	0.401271	4.77521	0.0203536	0.132894	0.192014	1.35189	0.253586	2.12403	0.226125	1.75619	-0.0276643	-0.174847
NA	AFF4	K363k	NA		NA	NA	NA	NA	NA	NA	NA	NA	NA		0.39209	0.873873	-0.0873117	-0.118041	0.479402	1.01796	0.165228	1.05813	0.217113	1.61969	0.28415	2.54066	-0.0200208	-0.13045	-0.00918103	-0.0342523	0.0782283	0.380283	0.117704	0.656186	-0.039273	-0.265052
NA	AFF4	K350k	NA		NA	NA	NA	NA	NA	NA	NA	NA	NA								0.0803332	0.388767	0.051346	0.223533	0.0330906	0.134379	0.0111852	0.0689202	-0.106438	-0.571195	0.110974	0.604805	-0.0129577	-0.0490893	-0.0976834	-0.890298
Q63HM1.kMSAEELENQYcPSR	AFMID	K17k	AFMID.K17k		0.75	1.5			0.807355	0.494469		NA		-0.637171	-0.481248	-2.41291	-0.387699	-1.82721	-0.0935482	-0.636745	-0.0610864	-0.275736	0.0853044	0.420154	-0.0293003	-0.117248	-0.0564872	-0.456816	-0.017318	-0.0124813	1.17126	0.393421	-0.304134	-0.294627
Q63HM1.NSPQLkVAQAQPVDPTcR	AFMID	K226k	AFMID.K226k			0.25	0.25	0.5	1	0.407821	0.584963	0.26967	0.584963								-0.152169	-0.935859	-0.213901	-1.58127	-0.382833	-4.36353	0.0238205	0.158913	0.113758	0.625836	-0.136125	-0.806338	-0.083998	-0.416848	0.112273	1.09536
NA	AGER	K190k	NA		NA	NA	NA	NA	NA	NA	NA	NA	NA		0.39209	0.873873	-0.0873117	-0.118041	0.479402	1.01796	0.165228	1.05813	0.217113	1.61969	0.28415	2.54066	-0.0200208	-0.13045	-0.00918103	-0.0342523	0.0782283	0.380283	0.117704	0.656186	-0.039273	-0.265052
NA	AGER	K390k	NA		NA	NA	NA	NA	NA	NA	NA	NA	NA		0.39209	0.873873	-0.0873117	-0.118041	0.479402	1.01796	0.165228	1.05813	0.217113	1.61969	0.28415	2.54066	-0.0200208	-0.13045	-0.00918103	-0.0342523	0.0782283	0.380283	0.117704	0.656186	-0.039273	-0.265052
P52594.VSTNkAGLQTADK	AGFG1	K318k	AGFG1.K318k			0.5	0.25	0.5	1.58496	0.740669	0.584963	0.26967	0.584963	-0.249673	-0.294183	-2.30472	0.0335425	0.172646	-0.327725	-3.51236	-0.0157753	-0.0598468	-0.0313152	-0.126297	-0.0778738	-0.373577	0.00599632	0.0357324	0.17907	1.21302	-0.0301718	-0.122424	0.0852793	0.425139	0.0940126	0.841951
O95081.GSASTPVQGSIPEGkPLR	AGFG2	K173k	AGFG2.K173k		0.75	1.5	0.25	0.25	0.807355	1.00815				-1.00815	-0.0955611	-0.712268	-0.137111	-1.22731	0.04155	0.290409	-0.0961074	-0.491546	0.137755	0.809364	-0.00129032	-0.00461685	-0.0902394	-0.87423	-0.227952	-1.77947	0.106574	0.57219	-0.109368	-0.592813	-0.150303	-1.73227
NA	AGO1	K458k	NA		NA	NA	NA	NA	NA	NA	NA	NA	NA		-0.0750939	-0.431424	-0.0949848	-0.837623	0.0198908	0.0415367	-0.0178101	-0.0681161	-0.103771	-0.544881	-0.0287565	-0.114828	0.0331692	0.234252	0.0606015	0.27621	-0.124476	-0.709752	-0.0166303	-0.0639431	0.0831556	0.706384
Q9UL18.LTDNQTSTMIkATAR	AGO1	K364k	AGO1.K364k			0.5		0.5	1.58496	0.740669	1.58496	0.740669	1.58496		-0.0442945	-0.596994	-0.0675417	-0.419312	0.0232472	0.134104	-0.201395	-1.43638	0.296107	2.73019	0.00684145	0.0250385	-0.191969	-2.94435	0.0982502	0.512608	0.129342	0.749404	0.13325	0.781975	-0.0139694	-0.0814945
Q9UL18.NVVkTSPQTLSNLcLK	AGO1	K552k	AGO1.K552k		0.25	0.5		0.75	0.584963	0.26967	2	0.667218	2	-0.384418							0.134387	0.781067	0.127031	0.720874	0.128731	0.734589	0.00283852	0.0165702	0.111789	0.592953	-0.00486916	-0.0173194	0.0770338	0.363184	0.0525423	0.370039
Q9UKV8.SIEEQQkPLTDSQR	AGO2	K248k	AGO2.K248k		0.75	0.75		0.75			2	1.23906	2	-1.10712	-0.100487	-0.546933	0.0263021	0.0771564	-0.126789	-0.633465	-0.00582324	-0.0212242	-0.0269298	-0.106769	-0.0670727	-0.309468	0.00814431	0.0492119	-0.137849	-0.821119	-0.142022	-0.857408	-0.110923	-0.604417	0.00187464	0.0101647
NA	AGO2	K381k	NA		NA	NA	NA	NA	NA	NA	NA	NA	NA		-0.0750939	-0.431424	-0.0949848	-0.837623	0.0198908	0.0415367	-0.0178101	-0.0681161	-0.103771	-0.544881	-0.0287565	-0.114828	0.0331692	0.234252	0.0606015	0.27621	-0.124476	-0.709752	-0.0166303	-0.0639431	0.0831556	0.706384
NA	AGO2	K726k	NA		NA	NA	NA	NA	NA	NA	NA	NA	NA		-0.0750939	-0.431424	-0.0949848	-0.837623	0.0198908	0.0415367	-0.0178101	-0.0681161	-0.103771	-0.544881	-0.0287565	-0.114828	0.0331692	0.234252	0.0606015	0.27621	-0.124476	-0.709752	-0.0166303	-0.0639431	0.0831556	0.706384
Q9UKV8.DAGMPIQGQPcFckYAqGADSVEPMFR	AGO2	K493k	AGO2.K493k		0.25	0.25		0.5			1.58496	0.740669	1.58496	-0.621125	0.0603372	0.120466	-0.0121895	-0.0479927	0.0725267	0.200049	0.193865	1.3527	0.0266698	0.10563	0.312086	2.99623	0.0645148	0.545504	-0.10609	-0.568654	0.103395	0.549114	0.0327584	0.134273	-0.0941218	-0.84337
Q9UKV8.NkAIATPVQGVWDMR	AGO2	K425k	AGO2.K425k		1.5	2.25	2	1.25	0.514573	1.00815	-0.584963	-0.667218	-0.584963	1.36094	-0.116706	-1.19471	-0.152558	-0.854488	0.0358527	0.439688	0.0261746	0.103468	0.0223001	0.0868191	0.141337	0.839985	0.00149503	0.00865086	0.190601	1.33636	0.00498333	0.0182753	0.0107635	0.0404156	0.0833983	0.709295
Q9UKV8.VGDTVLGMATQcVQMkNVQR	AGO2	K550k	AGO2.K550k		0.75	0.5	0.25	0.5	-0.415037	-0.26967	0.584963	0.26967	0.584963	-0.574189	0.151774	0.576547	0.0905975	0.328977	0.0611768	0.525138	-0.00433028	-0.0156873	-0.185893	-1.26697	-0.153957	-0.952165	0.070059	0.610528	-0.219081	-1.66804	-0.175232	-1.17332	-0.167705	-1.09742	-0.0197015	-0.118895
Q9H9G7.LTDNQTSTMIkATAR	AGO3	K367k	AGO3.K367k			0.5	0.25	0.25	1.58496	0.740669				-0.621125							0.0269804	0.0415445	-0.280201	-0.668448	-0.52203	-1.72562	0.114188	0.383637	0.26619	0.728908	-0.357017	-0.815784	0.0500136	0.0705499	0.245333	1.11491
Q99943.NVENMkILR	AGPAT1	K67k	AGPAT1.K67k		1	0.5	2.5	1.25	-0.736966	-0.407821	-0.874469	-1.75778	-0.874469	-0.611516	-0.00127128	-0.0100301	-0.069316	-1.6185	0.0680447	0.891478	0.00787723	0.0289504	-0.103686	-0.544278	-0.106595	-0.565111	0.0430484	0.322349	-0.146318	-0.895555	-0.161064	-1.03258	-0.0938859	-0.482452	0.0066256	0.0369827
O15120.SFkYFYGLR	AGPAT2	K71k	AGPAT2.K71k		0.25		0.5	0.5	-1	-0.407821				-0.346609	0.129308	0.835172	0.00414792	0.0216159	0.12516	0.845656	0.289485	2.62423	-0.0727091	-0.342397	0.358201	3.85064	0.139759	1.71602	0.14795	0.910257	-0.0600708	-0.273252	-0.0137482	-0.0522506	0.093464	0.834835
O15120.TTFLHISkTPQEnGATAGSGVQPAQ	AGPAT2	K261k	AGPAT2.K261k		1	0.25	0.75	0.5	-1.32193	-0.748885	-0.415037	-0.171537	-0.415037	-0.621125							-0.155061	-0.9623	-0.0747757	-0.354757	-0.322474	-3.17725	-0.0309792	-0.215915	0.19722	1.40996	-0.0318545	-0.130107	0.0417538	0.177218	0.102923	0.961552
Q9NUQ2.GLAVLkHVLTPR	AGPAT5	K201k	AGPAT5.K201k		0.25	0.75	0.25	0.5	1	0.396592	0.584963	0.26967	0.584963	-0.171537							-0.0598934	-0.269165	0.133572	0.774284	0.0349236	0.142832	-0.0746516	-0.666772	-0.132182	-0.773012	0.0114899	0.0432705	-0.212905	-1.59277	-0.0645521	-0.499065
O00116.TTSkASLNPSDTPPSVVNEDFLHDLK	AGPS	K147k	AGPS.K147k		1	0.5	0.75	0.75	-0.736966	-0.740669				-0.621125	-0.307988	-1.88322	-0.319565	-1.49857	0.0115772	0.0347172	0.435717	5.6127	0.0266716	0.105638	0.543081	8.89964	0.157837	2.09884
O00116.SVkEYVDPNNIFGNR	AGPS	K643k	AGPS.K643k		1.75	1.5	1.5	1.75	-0.192645	-0.26967	0.192645	0.26967	0.192645	-0.621125	0.150365	0.835259	0.0386486	0.141392	0.111717	0.411478	0.108806	0.581161	0.0932366	0.472144	0.177589	1.18075	0.0060075	0.0358016	0.149404	0.92345	-0.094139	-0.484181	0.0289434	0.116874	0.109424	1.05368
O95994.DSRPkLPQTLSR	AGR2	K39k	AGR2.K39k		1.25	0.5	0.25	1.25	-1	-0.623013	1.58496	1.52259	1.58496	-2.40257	-0.29237	-1.12908	-0.206359	-1.05808	-0.086011	-0.905214
O95994.KDTkDSRPK	AGR2	K34k	AGR2.K34k		0.25	0.25	0.25	0.25							-0.0329266	-0.089181	0.0477063	0.177515	-0.0806328	-0.293914	0.110174	0.591197	0.20174	1.44028	0.319184	3.1192	-0.0353321	-0.252782	-0.0162726	-0.0624774	-0.00819687	-0.0304582	0.265733	2.2994	-0.00362841	-0.0198865
O95994.VFAENkEIQK	AGR2	K95k	AGR2.K95k		1.5	2.25	3.5	4	0.514573	0.466885	0.180572	0.305373	0.180572	-0.407821							-0.183228	-1.23896	-0.118179	-0.651361	-0.382044	-4.34645	-0.0251	-0.168775	0.130077	0.755481	-0.207174	-1.5246	-0.158581	-1.00884	0.151527	1.75536
O00468.EPLYVGGAPDFSkLAR	AGRN	K1777k	AGRN.K1777k		0.75			0.5	-2	-0.667218	1.58496	0.740669	1.58496	-1.64371	-0.10592	-0.645963	-0.134019	-0.972433	0.0280994	0.0455083	-0.0905379	-0.45419	-0.179385	-1.19914	-0.253435	-2.08973	0.0342832	0.243743	-0.0419936	-0.1784	-0.110533	-0.601498	-0.148974	-0.919534	0.0307948	0.198148
O00468.GLVEkSAGDVDTLAFDGR	AGRN	K1863k	AGRN.K1863k		2	1	2	1	-0.847997	-1.03753	-0.847997	-0.556965	-0.847997								0.201317	0.105477	-0.0747163	-0.0548725	0.96134	0.509094	0.0781768	0.0867593
O00468.GGAVcEkVLGAPVPAFEGR	AGRN	K1368k	AGRN.K1368k		0.75	0.75		1			2.32193	1.88194	2.32193	-0.893105							0.0465634	0.199096	0.114264	0.621616	0.134921	0.785525	-0.0261233	-0.176764	0.194764	1.38241	-0.104836	-0.559524	0.0984516	0.514017	0.134611	1.45089
Q8WYP5.GQTSNTkLLGcQSIEK	AHCTF1	K350k	AHCTF1.K350k		1.25	2.5	1.5	3.25	0.874469	0.916957	1	2.40257	1	-0.37964	-0.0708764	-1.09337	-0.0633912	-0.606295	-0.00748523	-0.0352978	0.248836	2.02652	0.120341	0.668049	0.477681	6.76518	0.0495819	0.385572	0.179533	1.21784	0.178158	1.20352	0.240802	1.94795	0.000617837	0.00332423
Q8WYP5.SLPSSSQLkGSPQAISR	AHCTF1	K1158k	AHCTF1.K1158k		0.75	2	3	2.75	1.16993	1.0208	-0.115477	-0.204865	-0.115477	1.58416	0.0528896	0.177096	-0.100771	-0.334149	0.153661	0.431052	0.234935	1.84205	0.0717003	0.336419	0.412328	5.03407	0.0629868	0.528129	0.0599123	0.270259	0.0891882	0.384039	0.145891	0.814832	-0.00555298	-0.0283313
NA	AHCTF1	K1686k	NA		NA	NA	NA	NA	NA	NA	NA	NA	NA		0.0590521	0.180791	-0.292164	-1.0745	0.351216	1.21206	0.176279	1.16743	-0.186238	-1.27062	0.109744	0.588033	0.139883	1.7185	-0.134486	-0.792403	0.0825936	0.407832	-0.112431	-0.615769	-0.0975339	-0.888304
Q8WYP5.IGEVWASkEPINSTTPFNSSK	AHCTF1	K1069k	AHCTF1.K1069k		1.75	1.5	1.75	1.25	-0.192645	-0.136451	-0.415037	-0.683964	-0.415037	-0.170176							0.246377	1.99316	0.030551	0.12285	0.196055	1.37676	0.0832797	0.778399	-0.0943345	-0.292986	0.264448	1.27986	-0.0578906	-0.151421	-0.160017	-1.08376
P23526.SkFDNLYGcR	AHCY	K188k	AHCY.K188k		2	2.75	2.5	2.75	0.415037	0.667218	0.125531	0.13266	0.125531	-0.396592	-0.109746	-0.392437	0.00170739	0.0150966	-0.111454	-0.8573	0.251751	2.06645	0.0922264	0.465391	0.280959	2.49143	0.061555	0.51206	0.224851	1.74007	0.0463424	0.200181	0.124135	0.707005	0.0802042	0.671418
P23526.LNVkLTK	AHCY	K405k	AHCY.K405k		0.75		0.25	0.5	-2	-1.23906	0.584963	0.170176	0.584963	-0.855968	-0.0403899	-0.11279	0.0453987	0.233686	-0.0857886	-0.687919	0.239841	1.90603	0.241555	1.92867	0.502602	7.52611	-0.000661317	-0.00380572	0.306831	2.95357	-0.0871329	-0.437243	0.230339	1.81013	0.177008	2.27498
P23526.VPAINVNDSVTkSK	AHCY	K186k	AHCY.K186k		2.5	2.5	2	1			-0.847997	-1.03753	-0.847997	1.39234	0.143434	0.796178	0.205704	0.922079	-0.0622702	-0.233742	-0.261485	-2.20302	-0.0690948	-0.32115	-0.340945	-3.51532	-0.0742367	-0.661602	-0.250753	-2.08428	-0.0667815	-0.311407	-0.22097	-1.69144	-0.0826587	-0.700441
P23526.GISEETTTGVHNLYkMMAnGILK	AHCY	K166k	AHCY.K166k		1.75	0.75	1.5	0.25	-1	-0.447914	-1.80735	-0.606682	-1.80735	0.177285	-0.0498272	-0.718892	-0.0154054	-0.0907669	-0.0344218	-0.231543	0.12001	0.665482	-0.236842	-1.86677	-0.0326856	-0.132527	0.137697	1.67506	-0.0375037	-0.156589	0.0859848	0.42973	-0.0641094	-0.29602	-0.0554835	-0.408988
P23526.kALDIAENEMPGLMR	AHCY	K20k	AHCY.K20k		2.75	3.25	1.75	1.75	0.222392	0.137664				-0.132381	0.0586346	0.306773	0.0213321	0.0690787	0.0373025	0.105805	0.0650856	0.29813	-0.155761	-0.968759	-0.105301	-0.555801	0.0852172	0.804552	-0.101758	-0.537382	0.114934	0.634813	0.0254031	0.101154	-0.0973596	-0.885982
P23526.WLNENAVEkVNIKPQVDR	AHCY	K318k	AHCY.K318k		1	1	0.5	1.5			1.22239	0.569777	1.22239	-0.607944	-0.0368195	-0.0700584	-0.151875	-0.418508	0.115055	0.271082	0.00301565	0.0108665	0.046261	0.197576	0.105793	0.559336	-0.0166869	-0.106477	0.143754	0.716584	0.141265	0.749189	0.0122925	0.043028	-0.00566068	-0.0265392
P23526.LTkLTEK	AHCY	K408k	AHCY.K408k		0.25	0.5		0.25	0.584963	0.26967	1	0.407821	1		0.0940249	1.08849	0.0722827	0.838313	0.0217423	0.388971	0.193265	1.34614	0.079562	0.383981	0.294809	2.70923	0.043874	0.330117	0.0432445	0.184599	0.0757794	0.365141	-0.020975	-0.0820643	-0.014618	-0.0856078
P23526.MmANGILkVPAInVNDSVTK	AHCY	K174k	AHCY.K174k		3.25	3.75	2.75	1.25	0.192645	0.140681	-1	-0.551614	-1	0.765448	0.0550398	0.194218	-0.114981	-0.385506	0.170021	0.51829	0.202415	1.44792	-0.0509473	-0.221466	0.297363	2.75057	0.097764	0.983804	0.0329513	0.135165	-0.0536614	-0.238313	-0.053732	-0.23869	0.0389151	0.262114
NA	AHCY	K206k	NA		NA	NA	NA	NA	NA	NA	NA	NA	NA		0.0590521	0.180791	-0.292164	-1.0745	0.351216	1.21206	0.176279	1.16743	-0.186238	-1.27062	0.109744	0.588033	0.139883	1.7185	-0.134486	-0.792403	0.0825936	0.407832	-0.112431	-0.615769	-0.0975339	-0.888304
P23526.VNIkPQVDR	AHCY	K322k	AHCY.K322k		4.5	6.25	4.75	5.25	0.452512	1.12724	0.137504	0.183484	0.137504	0.678491							0.0557699	0.246834	0.0220227	0.0856453	0.0883764	0.440008	0.0130219	0.0811839	0.00866726	0.0322679	-0.0616054	-0.281834	0.0922308	0.47121	0.0315735	0.204061
P23526.VAVVAGYGDVGkGcAQALR	AHCY	K226k	AHCY.K226k		1.5	2.5	2	3	0.652077	1.30255	0.530515	0.673092	0.530515								0.0443853	0.188223	-0.158193	-0.991347	-0.120087	-0.666078	0.0781681	0.71132	-0.141478	-0.852637	-0.0751428	-0.361241	-0.107573	-0.579526	-0.0298043	-0.190695
O43865.GSSNFcVkNIK	AHCYL1	K108k	AHCYL1.K108k		1.25	1	0.75	1	-0.263034	-0.407821	0.321928	0.151697	0.321928	-0.511353	-0.644058	-2.70423	-0.0508719	-0.0955357	-0.593186	-1.52338	0.155262	0.964154	0.0712824	0.333953	0.181126	1.2171	0.0324048	0.227804	0.16191	1.04073	0.160044	1.02279	0.112558	0.616733	0.000838404	0.00451711
O43865.QkFDNLYccR	AHCYL1	K286k	AHCYL1.K286k		0.5	1			0.736966	0.443709		NA		-0.511353	0.231958	0.532944	0.612568	1.3356	-0.38061	-0.897498	-0.0548264	-0.241808	-0.19393	-1.35342	-0.133706	-0.775403	0.0536755	0.42725	-0.366861	-4.09271	0.000707944	0.00255094	-0.0942847	-0.485177	-0.165149	-2.02374
O43865.NIkQAEFGR	AHCYL1	K111k	AHCYL1.K111k		1.75	0.25	0.5	1	-2	-1.36094	0.736966	0.443709	0.736966	-2.05668	-0.218114	-1.03431	-0.0320371	-0.0976378	-0.186077	-0.713151	0.134753	0.784117	-0.116877	-0.641402	0.16763	1.08143	0.0970955	0.973815	-0.182403	-1.24803	-0.0258688	-0.103199	-0.218333	-1.65882	-0.0703308	-0.560168
O43865.AQGEkPLAGAK	AHCYL1	K141k	AHCYL1.K141k		1.25	0.25		0.5	-1.58496	-0.552113	1.58496	0.740669	1.58496	-2.09432	-0.129555	-0.922016	-0.05663	-0.262403	-0.0729246	-0.506103	-0.0112113	-0.0417615	0.0591466	0.265077	0.0813362	0.395027	-0.0271487	-0.18486	0.00055138	0.00198551	-0.0197661	-0.0769617	-0.00809803	-0.0300788	0.00912865	0.0517317
O43865.YkQDVYLLPK	AHCYL1	K478k	AHCYL1.K478k		1	0.5		0.5	-0.736966	-0.443709	1.58496	0.407821	1.58496	-0.834908	0.154366	0.560545	0.178981	1.23306	-0.0246155	-0.109836	0.10025	0.520095	-0.0951226	-0.484855	0.138072	0.812059	0.0753875	0.675988	0.037443	0.156299	-0.122198	-0.691522	0.0270855	0.108574	0.0717269	0.57537
O43865.LcVPAmNVNDSVTkQK	AHCYL1	K284k	AHCYL1.K284k		3.75	3.75	3	2.5			-0.241008	-0.443709	-0.241008	-0.245189	-0.032197	-0.236343	-0.0943914	-1.05397	0.0621943	0.489348	0.398685	4.71598	0.0350236	0.143296	0.553777	9.29387	0.140325	1.72736	0.246314	2.02282	-0.0288239	-0.116337	0.0981672	0.512027	0.12362	1.26952
NA	AHCYL1	K17k	NA		NA	NA	NA	NA	NA	NA	NA	NA	NA		-0.0410394	-0.267863	-0.184206	-1.09019	0.143167	1.23015
NA	AHCYL1	K20k	NA		NA	NA	NA	NA	NA	NA	NA	NA	NA		-0.0410394	-0.267863	-0.184206	-1.09019	0.143167	1.23015
NA	AHCYL1	K53k	NA		NA	NA	NA	NA	NA	NA	NA	NA	NA		0.0487725	0.193801	-0.1381	-1.20949	0.186873	1.47293	-0.100681	-0.523107	0.0889666	0.443864	-0.108309	-0.577537	-0.0731787	-0.648496	-0.0543646	-0.242076	0.224424	1.73468	-0.133451	-0.783666	-0.12526	-1.29578
O43865.ESILDGLkR	AHCYL1	K302k	AHCYL1.K302k		3.75	2.25	2.75	2.75	-0.678072	-0.958549				-1.36094							-0.201616	-1.43888	-0.213704	-1.57893	-0.379399	-4.28953	0.00466428	0.0275549	0.103089	0.546911	-0.0272392	-0.109256	-0.0329785	-0.135291	0.0585564	0.438726
Q8N157.LLGAnGNANINSkLR	AHI1	K493k	AHI1.K493k		2	2.25	2	1.75	0.152003	0.204865	-0.169925	-0.204865	-0.169925	-0.683964	0.0395914	0.221146	-0.0432966	-0.293518	0.0828879	0.808449	0.310306	2.96585	0.0933907	0.473177	0.434663	5.58569	0.0837002	0.784039	0.0719495	0.341906	0.178029	1.20218	0.101542	0.535842	-0.0476616	-0.336855
Q8N157.VPDcIkPSYR	AHI1	K544k	AHI1.K544k		0.75	0.75	0.25	0.5			0.584963	0.26967	0.584963	-0.171537	0.20391	1.88508	-0.010012	-0.0626101	0.213922	1.98421	-0.102887	-0.538616	-0.202934	-1.45381	-0.28503	-2.55434	0.0386046	0.281621	-0.167965	-1.1	-0.0899154	-0.455659	-0.158946	-1.01231	-0.0350677	-0.231166
Q09666.VDVEVPDVSLEGPEGKLk	AHNAK	K1307k	AHNAK.K1307k		0.75	1	1.5	1.5	0.321928	0.204865				-0.196007	-0.0912043	-1.10976	0.113536	0.951907	-0.204741	-1.93198	-0.216065	-1.6071	-0.0912696	-0.459031	-0.316909	-3.07947	-0.0481542	-0.371413	-0.0903498	-0.45856	-0.105907	-0.567314	0.0268663	0.107602	0.00698968	0.0391012
NA	AHNAK	K3445k	NA		NA	NA	NA	NA	NA	NA	NA	NA	NA		-0.224179	-0.279374	0.106745	0.591299	-0.330924	-1.10808	-0.378164	-4.26312	0.315332	3.0521	-0.0470463	-0.201528	-0.267597	-5.48712	-0.0544979	-0.242791	0.300129	2.84026	0.0966981	0.501799	-0.159334	-1.90658
Q09666.GGVTGSPEASISGSkGDLK	AHNAK	K5740k	AHNAK.K5740k				1.5	1.25		NA	-0.222392	-0.171537	-0.222392	-0.195439	-0.1318	-2.308	-0.115457	-1.29598	-0.0163436	-1.05607	-0.0363845	-0.149647	0.28258	2.51637	0.186963	1.27831	-0.123078	-1.39983	-0.0136701	-0.0519375	0.185721	1.2834	0.164469	1.06558	-0.0895866	-0.785355
Q09666.FSMPSLkGEGPEFDVNLSK	AHNAK	K1012k	AHNAK.K1012k		0.75	0.25	0.5		-1	-0.683964	-1.58496	-0.740669	-1.58496		0.0267772	0.457385	0.0784052	0.648217	-0.0516281	-0.511769	-0.178833	-1.19347	-0.230317	-1.78292	-0.403725	-4.83187	0.0198657	0.129314	-0.174953	-1.17046	-0.0723521	-0.344323	-0.210959	-1.56944	-0.0460987	-0.323046
NA	AHNAK	K5346k	NA		NA	NA	NA	NA	NA	NA	NA	NA	NA		0.00584381	0.0160926	0.0744283	0.533439	-0.0685845	-0.359788	0.303549	2.85225	0.110295	0.592084	0.442768	5.79577	0.0745703	0.665758	0.0313088	0.127605	0.0973344	0.506218	0.104991	0.560649	-0.0296653	-0.189655
NA	AHNAK	K5402k	NA		NA	NA	NA	NA	NA	NA	NA	NA	NA		0.00584381	0.0160926	0.0744283	0.533439	-0.0685845	-0.359788	0.303549	2.85225	0.110295	0.592084	0.442768	5.79577	0.0745703	0.665758	0.0313088	0.127605	0.0973344	0.506218	0.104991	0.560649	-0.0296653	-0.189655
NA	AHNAK	K5434k	NA		NA	NA	NA	NA	NA	NA	NA	NA	NA		0.00584381	0.0160926	0.0744283	0.533439	-0.0685845	-0.359788	0.303549	2.85225	0.110295	0.592084	0.442768	5.79577	0.0745703	0.665758	0.0313088	0.127605	0.0973344	0.506218	0.104991	0.560649	-0.0296653	-0.189655
NA	AHNAK	K5462k	NA		NA	NA	NA	NA	NA	NA	NA	NA	NA		0.00584381	0.0160926	0.0744283	0.533439	-0.0685845	-0.359788	0.303549	2.85225	0.110295	0.592084	0.442768	5.79577	0.0745703	0.665758	0.0313088	0.127605	0.0973344	0.506218	0.104991	0.560649	-0.0296653	-0.189655
NA	AHNAK	K5512k	NA		NA	NA	NA	NA	NA	NA	NA	NA	NA		0.00584381	0.0160926	0.0744283	0.533439	-0.0685845	-0.359788	0.303549	2.85225	0.110295	0.592084	0.442768	5.79577	0.0745703	0.665758	0.0313088	0.127605	0.0973344	0.506218	0.104991	0.560649	-0.0296653	-0.189655
NA	AHNAK	K5524k	NA		NA	NA	NA	NA	NA	NA	NA	NA	NA		0.00584381	0.0160926	0.0744283	0.533439	-0.0685845	-0.359788	0.303549	2.85225	0.110295	0.592084	0.442768	5.79577	0.0745703	0.665758	0.0313088	0.127605	0.0973344	0.506218	0.104991	0.560649	-0.0296653	-0.189655
NA	AHNAK	K5528k	NA		NA	NA	NA	NA	NA	NA	NA	NA	NA		0.00584381	0.0160926	0.0744283	0.533439	-0.0685845	-0.359788	0.303549	2.85225	0.110295	0.592084	0.442768	5.79577	0.0745703	0.665758	0.0313088	0.127605	0.0973344	0.506218	0.104991	0.560649	-0.0296653	-0.189655
NA	AHNAK	K5562k	NA		NA	NA	NA	NA	NA	NA	NA	NA	NA		0.00584381	0.0160926	0.0744283	0.533439	-0.0685845	-0.359788	0.303549	2.85225	0.110295	0.592084	0.442768	5.79577	0.0745703	0.665758	0.0313088	0.127605	0.0973344	0.506218	0.104991	0.560649	-0.0296653	-0.189655
NA	AHNAK	K5598k	NA		NA	NA	NA	NA	NA	NA	NA	NA	NA		0.00584381	0.0160926	0.0744283	0.533439	-0.0685845	-0.359788	0.303549	2.85225	0.110295	0.592084	0.442768	5.79577	0.0745703	0.665758	0.0313088	0.127605	0.0973344	0.506218	0.104991	0.560649	-0.0296653	-0.189655
NA	AHNAK	K3775k	NA		NA	NA	NA	NA	NA	NA	NA	NA	NA		-0.0892593	-0.393809	-0.011108	-0.0277591	-0.0781513	-0.30942	0.15448	0.956963	0.161935	1.0266	0.32147	3.15946	-0.00287664	-0.0167969	0.201989	1.46429	-0.00830995	-0.0308926	0.224107	1.73069	0.0944872	0.84813
Q09666.DIDISSPEFKIk	AHNAK	K183k	AHNAK.K183k				0.5	0.75		NA	0.415037	0.26967	0.415037	-0.407821	-0.110666	-0.591656	-0.0427744	-0.277599	-0.0678918	-0.306704	0.148521	0.903019	0.191411	1.326	0.34677	3.62636	-0.0165497	-0.10551	0.132031	0.771745	0.111857	0.611437	0.0760777	0.366974	0.00906422	0.0513466
Q09666.VDIkAPDVEGQGLDWSLK	AHNAK	K1111k	AHNAK.K1111k		0.5	0.25	0.25	0.25	-0.584963	-0.26967				-0.295831	0.114162	0.147862	0.301909	0.497447	-0.187747	-0.253466	0.176665	1.17135	0.133816	0.776317	0.326624	3.25137	0.016534	0.1054	0.229266	1.79632	0.0915383	0.466537	0.374239	4.24909	0.0618813	0.471806
Q09666.VDVEGPDVNIEGPEGKLk	AHNAK	K2947k	AHNAK.K2947k				0.75	1		NA	0.321928	0.151697	0.321928	-0.233898	0.121034	1.29224	0.173608	0.952638	-0.0525744	-0.248637	0.182442	1.23076	0.070075	0.326866	0.329442	3.3023	0.0433587	0.325261	0.121728	0.687786	0.0143684	0.0547447	0.0938379	0.482125	0.0482367	0.341987
NA	AHNAK	K203k	NA		NA	NA	NA	NA	NA	NA	NA	NA	NA		-0.0485011	-0.130697	0.0161596	0.0273426	-0.0646607	-0.136456	0.154714	0.959116	0.0436216	0.184449	0.212602	1.56587	0.0428669	0.32065	0.0177234	0.0684456	-0.157737	-1.00083	-0.00731455	-0.0270819	0.0788345	0.65546
NA	AHNAK	K243k	NA		NA	NA	NA	NA	NA	NA	NA	NA	NA		-0.0485011	-0.130697	0.0161596	0.0273426	-0.0646607	-0.136456	0.154714	0.959116	0.0436216	0.184449	0.212602	1.56587	0.0428669	0.32065	0.0177234	0.0684456	-0.157737	-1.00083	-0.00731455	-0.0270819	0.0788345	0.65546
NA	AHNAK	K252k	NA		NA	NA	NA	NA	NA	NA	NA	NA	NA		-0.0485011	-0.130697	0.0161596	0.0273426	-0.0646607	-0.136456	0.154714	0.959116	0.0436216	0.184449	0.212602	1.56587	0.0428669	0.32065	0.0177234	0.0684456	-0.157737	-1.00083	-0.00731455	-0.0270819	0.0788345	0.65546
NA	AHNAK	K326k	NA		NA	NA	NA	NA	NA	NA	NA	NA	NA		-0.0485011	-0.130697	0.0161596	0.0273426	-0.0646607	-0.136456	0.154714	0.959116	0.0436216	0.184449	0.212602	1.56587	0.0428669	0.32065	0.0177234	0.0684456	-0.157737	-1.00083	-0.00731455	-0.0270819	0.0788345	0.65546
NA	AHNAK	K387k	NA		NA	NA	NA	NA	NA	NA	NA	NA	NA		-0.0485011	-0.130697	0.0161596	0.0273426	-0.0646607	-0.136456	0.154714	0.959116	0.0436216	0.184449	0.212602	1.56587	0.0428669	0.32065	0.0177234	0.0684456	-0.157737	-1.00083	-0.00731455	-0.0270819	0.0788345	0.65546
NA	AHNAK	K519k	NA		NA	NA	NA	NA	NA	NA	NA	NA	NA		-0.0485011	-0.130697	0.0161596	0.0273426	-0.0646607	-0.136456	0.154714	0.959116	0.0436216	0.184449	0.212602	1.56587	0.0428669	0.32065	0.0177234	0.0684456	-0.157737	-1.00083	-0.00731455	-0.0270819	0.0788345	0.65546
NA	AHNAK	K563k	NA		NA	NA	NA	NA	NA	NA	NA	NA	NA		-0.0485011	-0.130697	0.0161596	0.0273426	-0.0646607	-0.136456	0.154714	0.959116	0.0436216	0.184449	0.212602	1.56587	0.0428669	0.32065	0.0177234	0.0684456	-0.157737	-1.00083	-0.00731455	-0.0270819	0.0788345	0.65546
NA	AHNAK	K584k	NA		NA	NA	NA	NA	NA	NA	NA	NA	NA		-0.0485011	-0.130697	0.0161596	0.0273426	-0.0646607	-0.136456	0.154714	0.959116	0.0436216	0.184449	0.212602	1.56587	0.0428669	0.32065	0.0177234	0.0684456	-0.157737	-1.00083	-0.00731455	-0.0270819	0.0788345	0.65546
NA	AHNAK	K627k	NA		NA	NA	NA	NA	NA	NA	NA	NA	NA		-0.0485011	-0.130697	0.0161596	0.0273426	-0.0646607	-0.136456	0.154714	0.959116	0.0436216	0.184449	0.212602	1.56587	0.0428669	0.32065	0.0177234	0.0684456	-0.157737	-1.00083	-0.00731455	-0.0270819	0.0788345	0.65546
NA	AHNAK	K679k	NA		NA	NA	NA	NA	NA	NA	NA	NA	NA		-0.0485011	-0.130697	0.0161596	0.0273426	-0.0646607	-0.136456	0.154714	0.959116	0.0436216	0.184449	0.212602	1.56587	0.0428669	0.32065	0.0177234	0.0684456	-0.157737	-1.00083	-0.00731455	-0.0270819	0.0788345	0.65546
NA	AHNAK	K707k	NA		NA	NA	NA	NA	NA	NA	NA	NA	NA		-0.0485011	-0.130697	0.0161596	0.0273426	-0.0646607	-0.136456	0.154714	0.959116	0.0436216	0.184449	0.212602	1.56587	0.0428669	0.32065	0.0177234	0.0684456	-0.157737	-1.00083	-0.00731455	-0.0270819	0.0788345	0.65546
NA	AHNAK	K712k	NA		NA	NA	NA	NA	NA	NA	NA	NA	NA		-0.0485011	-0.130697	0.0161596	0.0273426	-0.0646607	-0.136456	0.154714	0.959116	0.0436216	0.184449	0.212602	1.56587	0.0428669	0.32065	0.0177234	0.0684456	-0.157737	-1.00083	-0.00731455	-0.0270819	0.0788345	0.65546
NA	AHNAK	K727k	NA		NA	NA	NA	NA	NA	NA	NA	NA	NA		-0.0485011	-0.130697	0.0161596	0.0273426	-0.0646607	-0.136456	0.154714	0.959116	0.0436216	0.184449	0.212602	1.56587	0.0428669	0.32065	0.0177234	0.0684456	-0.157737	-1.00083	-0.00731455	-0.0270819	0.0788345	0.65546
NA	AHNAK	K730k	NA		NA	NA	NA	NA	NA	NA	NA	NA	NA		-0.0485011	-0.130697	0.0161596	0.0273426	-0.0646607	-0.136456	0.154714	0.959116	0.0436216	0.184449	0.212602	1.56587	0.0428669	0.32065	0.0177234	0.0684456	-0.157737	-1.00083	-0.00731455	-0.0270819	0.0788345	0.65546
NA	AHNAK	K748k	NA		NA	NA	NA	NA	NA	NA	NA	NA	NA		-0.0485011	-0.130697	0.0161596	0.0273426	-0.0646607	-0.136456	0.154714	0.959116	0.0436216	0.184449	0.212602	1.56587	0.0428669	0.32065	0.0177234	0.0684456	-0.157737	-1.00083	-0.00731455	-0.0270819	0.0788345	0.65546
NA	AHNAK	K763k	NA		NA	NA	NA	NA	NA	NA	NA	NA	NA		-0.0485011	-0.130697	0.0161596	0.0273426	-0.0646607	-0.136456	0.154714	0.959116	0.0436216	0.184449	0.212602	1.56587	0.0428669	0.32065	0.0177234	0.0684456	-0.157737	-1.00083	-0.00731455	-0.0270819	0.0788345	0.65546
NA	AHNAK	K775k	NA		NA	NA	NA	NA	NA	NA	NA	NA	NA		-0.0485011	-0.130697	0.0161596	0.0273426	-0.0646607	-0.136456	0.154714	0.959116	0.0436216	0.184449	0.212602	1.56587	0.0428669	0.32065	0.0177234	0.0684456	-0.157737	-1.00083	-0.00731455	-0.0270819	0.0788345	0.65546
NA	AHNAK	K807k	NA		NA	NA	NA	NA	NA	NA	NA	NA	NA		-0.0485011	-0.130697	0.0161596	0.0273426	-0.0646607	-0.136456	0.154714	0.959116	0.0436216	0.184449	0.212602	1.56587	0.0428669	0.32065	0.0177234	0.0684456	-0.157737	-1.00083	-0.00731455	-0.0270819	0.0788345	0.65546
NA	AHNAK	K828k	NA		NA	NA	NA	NA	NA	NA	NA	NA	NA		-0.0485011	-0.130697	0.0161596	0.0273426	-0.0646607	-0.136456	0.154714	0.959116	0.0436216	0.184449	0.212602	1.56587	0.0428669	0.32065	0.0177234	0.0684456	-0.157737	-1.00083	-0.00731455	-0.0270819	0.0788345	0.65546
NA	AHNAK	K848k	NA		NA	NA	NA	NA	NA	NA	NA	NA	NA		-0.0485011	-0.130697	0.0161596	0.0273426	-0.0646607	-0.136456	0.154714	0.959116	0.0436216	0.184449	0.212602	1.56587	0.0428669	0.32065	0.0177234	0.0684456	-0.157737	-1.00083	-0.00731455	-0.0270819	0.0788345	0.65546
NA	AHNAK	K858k	NA		NA	NA	NA	NA	NA	NA	NA	NA	NA		-0.0485011	-0.130697	0.0161596	0.0273426	-0.0646607	-0.136456	0.154714	0.959116	0.0436216	0.184449	0.212602	1.56587	0.0428669	0.32065	0.0177234	0.0684456	-0.157737	-1.00083	-0.00731455	-0.0270819	0.0788345	0.65546
NA	AHNAK	K876k	NA		NA	NA	NA	NA	NA	NA	NA	NA	NA		-0.0485011	-0.130697	0.0161596	0.0273426	-0.0646607	-0.136456	0.154714	0.959116	0.0436216	0.184449	0.212602	1.56587	0.0428669	0.32065	0.0177234	0.0684456	-0.157737	-1.00083	-0.00731455	-0.0270819	0.0788345	0.65546
NA	AHNAK	K891k	NA		NA	NA	NA	NA	NA	NA	NA	NA	NA		-0.0485011	-0.130697	0.0161596	0.0273426	-0.0646607	-0.136456	0.154714	0.959116	0.0436216	0.184449	0.212602	1.56587	0.0428669	0.32065	0.0177234	0.0684456	-0.157737	-1.00083	-0.00731455	-0.0270819	0.0788345	0.65546
NA	AHNAK	K928k	NA		NA	NA	NA	NA	NA	NA	NA	NA	NA		-0.0485011	-0.130697	0.0161596	0.0273426	-0.0646607	-0.136456	0.154714	0.959116	0.0436216	0.184449	0.212602	1.56587	0.0428669	0.32065	0.0177234	0.0684456	-0.157737	-1.00083	-0.00731455	-0.0270819	0.0788345	0.65546
NA	AHNAK	K942k	NA		NA	NA	NA	NA	NA	NA	NA	NA	NA		-0.0485011	-0.130697	0.0161596	0.0273426	-0.0646607	-0.136456	0.154714	0.959116	0.0436216	0.184449	0.212602	1.56587	0.0428669	0.32065	0.0177234	0.0684456	-0.157737	-1.00083	-0.00731455	-0.0270819	0.0788345	0.65546
NA	AHNAK	K956k	NA		NA	NA	NA	NA	NA	NA	NA	NA	NA		-0.0485011	-0.130697	0.0161596	0.0273426	-0.0646607	-0.136456	0.154714	0.959116	0.0436216	0.184449	0.212602	1.56587	0.0428669	0.32065	0.0177234	0.0684456	-0.157737	-1.00083	-0.00731455	-0.0270819	0.0788345	0.65546
NA	AHNAK	K961k	NA		NA	NA	NA	NA	NA	NA	NA	NA	NA		-0.0485011	-0.130697	0.0161596	0.0273426	-0.0646607	-0.136456	0.154714	0.959116	0.0436216	0.184449	0.212602	1.56587	0.0428669	0.32065	0.0177234	0.0684456	-0.157737	-1.00083	-0.00731455	-0.0270819	0.0788345	0.65546
NA	AHNAK	K976k	NA		NA	NA	NA	NA	NA	NA	NA	NA	NA		-0.0485011	-0.130697	0.0161596	0.0273426	-0.0646607	-0.136456	0.154714	0.959116	0.0436216	0.184449	0.212602	1.56587	0.0428669	0.32065	0.0177234	0.0684456	-0.157737	-1.00083	-0.00731455	-0.0270819	0.0788345	0.65546
NA	AHNAK	K997k	NA		NA	NA	NA	NA	NA	NA	NA	NA	NA		-0.0485011	-0.130697	0.0161596	0.0273426	-0.0646607	-0.136456	0.154714	0.959116	0.0436216	0.184449	0.212602	1.56587	0.0428669	0.32065	0.0177234	0.0684456	-0.157737	-1.00083	-0.00731455	-0.0270819	0.0788345	0.65546
NA	AHNAK	K1024k	NA		NA	NA	NA	NA	NA	NA	NA	NA	NA		-0.0485011	-0.130697	0.0161596	0.0273426	-0.0646607	-0.136456	0.154714	0.959116	0.0436216	0.184449	0.212602	1.56587	0.0428669	0.32065	0.0177234	0.0684456	-0.157737	-1.00083	-0.00731455	-0.0270819	0.0788345	0.65546
NA	AHNAK	K1049k	NA		NA	NA	NA	NA	NA	NA	NA	NA	NA		-0.0485011	-0.130697	0.0161596	0.0273426	-0.0646607	-0.136456	0.154714	0.959116	0.0436216	0.184449	0.212602	1.56587	0.0428669	0.32065	0.0177234	0.0684456	-0.157737	-1.00083	-0.00731455	-0.0270819	0.0788345	0.65546
NA	AHNAK	K1077k	NA		NA	NA	NA	NA	NA	NA	NA	NA	NA		-0.0485011	-0.130697	0.0161596	0.0273426	-0.0646607	-0.136456	0.154714	0.959116	0.0436216	0.184449	0.212602	1.56587	0.0428669	0.32065	0.0177234	0.0684456	-0.157737	-1.00083	-0.00731455	-0.0270819	0.0788345	0.65546
NA	AHNAK	K1082k	NA		NA	NA	NA	NA	NA	NA	NA	NA	NA		-0.0485011	-0.130697	0.0161596	0.0273426	-0.0646607	-0.136456	0.154714	0.959116	0.0436216	0.184449	0.212602	1.56587	0.0428669	0.32065	0.0177234	0.0684456	-0.157737	-1.00083	-0.00731455	-0.0270819	0.0788345	0.65546
NA	AHNAK	K1140k	NA		NA	NA	NA	NA	NA	NA	NA	NA	NA		-0.0485011	-0.130697	0.0161596	0.0273426	-0.0646607	-0.136456	0.154714	0.959116	0.0436216	0.184449	0.212602	1.56587	0.0428669	0.32065	0.0177234	0.0684456	-0.157737	-1.00083	-0.00731455	-0.0270819	0.0788345	0.65546
NA	AHNAK	K1152k	NA		NA	NA	NA	NA	NA	NA	NA	NA	NA		-0.0485011	-0.130697	0.0161596	0.0273426	-0.0646607	-0.136456	0.154714	0.959116	0.0436216	0.184449	0.212602	1.56587	0.0428669	0.32065	0.0177234	0.0684456	-0.157737	-1.00083	-0.00731455	-0.0270819	0.0788345	0.65546
NA	AHNAK	K1161k	NA		NA	NA	NA	NA	NA	NA	NA	NA	NA		-0.0485011	-0.130697	0.0161596	0.0273426	-0.0646607	-0.136456	0.154714	0.959116	0.0436216	0.184449	0.212602	1.56587	0.0428669	0.32065	0.0177234	0.0684456	-0.157737	-1.00083	-0.00731455	-0.0270819	0.0788345	0.65546
NA	AHNAK	K4608k	NA		NA	NA	NA	NA	NA	NA	NA	NA	NA		0.0195528	0.0680947	0.0307584	0.121187	-0.0112056	-0.0467791	-0.315246	-3.0506	0.31437	3.03548	-0.0564319	-0.25038	-0.242947	-4.5452	-0.199553	-1.43641	0.0963117	0.499122	-0.220527	-1.68593	-0.132932	-1.42238
NA	AHNAK	K1232k	NA		NA	NA	NA	NA	NA	NA	NA	NA	NA		0.132512	0.393179	0.152704	0.395706	-0.0201915	-0.0322337	-0.173807	-1.14251	-0.149679	-0.913381	-0.415009	-5.09821	-0.00931031	-0.0566817	-0.305576	-2.93215	-0.118082	-0.65912	-0.235075	-1.87182	-0.0842415	-0.71945
NA	AHNAK	K4623k	NA		NA	NA	NA	NA	NA	NA	NA	NA	NA		0.139501	0.515955	0.134445	0.489912	0.00505636	0.00474681	-0.0932238	-0.472058	0.148353	0.901516	0.0140005	0.052738	-0.0932161	-0.916829	-0.00535773	-0.0196786	0.135422	0.800347	-0.088238	-0.444521	-0.0632524	-0.485723
NA	AHNAK	K2401k	NA		NA	NA	NA	NA	NA	NA	NA	NA	NA		0.0592691	0.257377	0.0550299	0.139978	0.00423925	0.0345943	0.0286804	0.11449	-0.0464055	-0.198302	0.128068	0.729227	0.0289731	0.19949	-0.0343903	-0.141862	0.0420001	0.178432	0.0463643	0.200292	-0.0343222	-0.225304
NA	AHNAK	K2416k	NA		NA	NA	NA	NA	NA	NA	NA	NA	NA		0.0592691	0.257377	0.0550299	0.139978	0.00423925	0.0345943	0.0286804	0.11449	-0.0464055	-0.198302	0.128068	0.729227	0.0289731	0.19949	-0.0343903	-0.141862	0.0420001	0.178432	0.0463643	0.200292	-0.0343222	-0.225304
NA	AHNAK	K2435k	NA		NA	NA	NA	NA	NA	NA	NA	NA	NA		0.0592691	0.257377	0.0550299	0.139978	0.00423925	0.0345943	0.0286804	0.11449	-0.0464055	-0.198302	0.128068	0.729227	0.0289731	0.19949	-0.0343903	-0.141862	0.0420001	0.178432	0.0463643	0.200292	-0.0343222	-0.225304
NA	AHNAK	K2449k	NA		NA	NA	NA	NA	NA	NA	NA	NA	NA		0.0592691	0.257377	0.0550299	0.139978	0.00423925	0.0345943	0.0286804	0.11449	-0.0464055	-0.198302	0.128068	0.729227	0.0289731	0.19949	-0.0343903	-0.141862	0.0420001	0.178432	0.0463643	0.200292	-0.0343222	-0.225304
NA	AHNAK	K2468k	NA		NA	NA	NA	NA	NA	NA	NA	NA	NA		0.0592691	0.257377	0.0550299	0.139978	0.00423925	0.0345943	0.0286804	0.11449	-0.0464055	-0.198302	0.128068	0.729227	0.0289731	0.19949	-0.0343903	-0.141862	0.0420001	0.178432	0.0463643	0.200292	-0.0343222	-0.225304
NA	AHNAK	K2589k	NA		NA	NA	NA	NA	NA	NA	NA	NA	NA		0.0592691	0.257377	0.0550299	0.139978	0.00423925	0.0345943	0.0286804	0.11449	-0.0464055	-0.198302	0.128068	0.729227	0.0289731	0.19949	-0.0343903	-0.141862	0.0420001	0.178432	0.0463643	0.200292	-0.0343222	-0.225304
NA	AHNAK	K2609k	NA		NA	NA	NA	NA	NA	NA	NA	NA	NA		0.0592691	0.257377	0.0550299	0.139978	0.00423925	0.0345943	0.0286804	0.11449	-0.0464055	-0.198302	0.128068	0.729227	0.0289731	0.19949	-0.0343903	-0.141862	0.0420001	0.178432	0.0463643	0.200292	-0.0343222	-0.225304
NA	AHNAK	K2616k	NA		NA	NA	NA	NA	NA	NA	NA	NA	NA		0.0592691	0.257377	0.0550299	0.139978	0.00423925	0.0345943	0.0286804	0.11449	-0.0464055	-0.198302	0.128068	0.729227	0.0289731	0.19949	-0.0343903	-0.141862	0.0420001	0.178432	0.0463643	0.200292	-0.0343222	-0.225304
NA	AHNAK	K1668k	NA		NA	NA	NA	NA	NA	NA	NA	NA	NA		-0.151195	-0.219736	-0.222803	-0.616456	0.0716081	0.0897338	-0.33486	-3.40161	0.0372426	0.153683	-0.329346	-3.30055	-0.143582	-1.79342	-0.0597249	-0.271329	0.0197069	0.0767131	0.0432732	0.184742	-0.0356888	-0.236083
NA	AHNAK	K1683k	NA		NA	NA	NA	NA	NA	NA	NA	NA	NA		-0.151195	-0.219736	-0.222803	-0.616456	0.0716081	0.0897338	-0.33486	-3.40161	0.0372426	0.153683	-0.329346	-3.30055	-0.143582	-1.79342	-0.0597249	-0.271329	0.0197069	0.0767131	0.0432732	0.184742	-0.0356888	-0.236083
NA	AHNAK	K1711k	NA		NA	NA	NA	NA	NA	NA	NA	NA	NA		-0.151195	-0.219736	-0.222803	-0.616456	0.0716081	0.0897338	-0.33486	-3.40161	0.0372426	0.153683	-0.329346	-3.30055	-0.143582	-1.79342	-0.0597249	-0.271329	0.0197069	0.0767131	0.0432732	0.184742	-0.0356888	-0.236083
NA	AHNAK	K1545k	NA		NA	NA	NA	NA	NA	NA	NA	NA	NA		0.169006	1.22468	0.166266	1.84813	0.00274033	0.110292	-0.49047	-7.14811	0.035466	0.145354	-0.490829	-7.1591	-0.202941	-3.25276	-0.23805	-1.91115	-0.0480565	-0.208944	-0.282292	-2.55145	-0.0853641	-0.733073
NA	AHNAK	K1561k	NA		NA	NA	NA	NA	NA	NA	NA	NA	NA		0.169006	1.22468	0.166266	1.84813	0.00274033	0.110292	-0.49047	-7.14811	0.035466	0.145354	-0.490829	-7.1591	-0.202941	-3.25276	-0.23805	-1.91115	-0.0480565	-0.208944	-0.282292	-2.55145	-0.0853641	-0.733073
NA	AHNAK	K1589k	NA		NA	NA	NA	NA	NA	NA	NA	NA	NA		0.169006	1.22468	0.166266	1.84813	0.00274033	0.110292	-0.49047	-7.14811	0.035466	0.145354	-0.490829	-7.1591	-0.202941	-3.25276	-0.23805	-1.91115	-0.0480565	-0.208944	-0.282292	-2.55145	-0.0853641	-0.733073
NA	AHNAK	K1594k	NA		NA	NA	NA	NA	NA	NA	NA	NA	NA		0.169006	1.22468	0.166266	1.84813	0.00274033	0.110292	-0.49047	-7.14811	0.035466	0.145354	-0.490829	-7.1591	-0.202941	-3.25276	-0.23805	-1.91115	-0.0480565	-0.208944	-0.282292	-2.55145	-0.0853641	-0.733073
NA	AHNAK	K2214k	NA		NA	NA	NA	NA	NA	NA	NA	NA	NA		-0.142064	-1.22814	-0.189255	-1.31103	0.0471908	0.111945	-0.160235	-1.01051	-0.00173804	-0.00623018	-0.257943	-2.15275	-0.0611586	-0.507648	0.0168038	0.064655	-0.0233013	-0.0920145	-0.144595	-0.880159	0.0180192	0.107673
NA	AHNAK	K2257k	NA		NA	NA	NA	NA	NA	NA	NA	NA	NA		-0.142064	-1.22814	-0.189255	-1.31103	0.0471908	0.111945	-0.160235	-1.01051	-0.00173804	-0.00623018	-0.257943	-2.15275	-0.0611586	-0.507648	0.0168038	0.064655	-0.0233013	-0.0920145	-0.144595	-0.880159	0.0180192	0.107673
NA	AHNAK	K2322k	NA		NA	NA	NA	NA	NA	NA	NA	NA	NA		-0.142064	-1.22814	-0.189255	-1.31103	0.0471908	0.111945	-0.160235	-1.01051	-0.00173804	-0.00623018	-0.257943	-2.15275	-0.0611586	-0.507648	0.0168038	0.064655	-0.0233013	-0.0920145	-0.144595	-0.880159	0.0180192	0.107673
NA	AHNAK	K5858k	NA		NA	NA	NA	NA	NA	NA	NA	NA	NA		0.208538	0.16319	0.0416292	0.030284	0.166909	0.132155	-0.00766929	-0.0281625	-0.102028	-0.532555	-0.0543635	-0.239353	0.0364099	0.262173	-0.21345	-1.59933	-0.144458	-0.878944	-0.22784	-1.77804	-0.030998	-0.199686
NA	AHNAK	K1616k	NA		NA	NA	NA	NA	NA	NA	NA	NA	NA		0.215149	0.446554	0.157173	0.419533	0.0579763	0.135334	0.0352862	0.144517	0.0937052	0.47529	0.101285	0.527334	-0.0225419	-0.149199	0.100619	0.529287	-0.0529567	-0.23456	0.188811	1.3168	0.0690016	0.545855
NA	AHNAK	K1619k	NA		NA	NA	NA	NA	NA	NA	NA	NA	NA		0.215149	0.446554	0.157173	0.419533	0.0579763	0.135334	0.0352862	0.144517	0.0937052	0.47529	0.101285	0.527334	-0.0225419	-0.149199	0.100619	0.529287	-0.0529567	-0.23456	0.188811	1.3168	0.0690016	0.545855
NA	AHNAK	K1635k	NA		NA	NA	NA	NA	NA	NA	NA	NA	NA		0.215149	0.446554	0.157173	0.419533	0.0579763	0.135334	0.0352862	0.144517	0.0937052	0.47529	0.101285	0.527334	-0.0225419	-0.149199	0.100619	0.529287	-0.0529567	-0.23456	0.188811	1.3168	0.0690016	0.545855
NA	AHNAK	K1405k	NA		NA	NA	NA	NA	NA	NA	NA	NA	NA		0.115352	0.176083	-0.0111178	-0.0134719	0.126469	0.190238	0.173113	1.13557	-0.0199829	-0.0770882	0.213383	1.57512	0.0745093	0.664997	-0.00965702	-0.036098	0.103023	0.546442	0.0463801	0.200372	-0.0506274	-0.363609
Q09666.VDIEAPDVSLEGPEGkLK	AHNAK	K1177k	AHNAK.K1177k		0.25	0.25		0.5			1.58496	0.740669	1.58496	-0.621125	0.0603372	0.120466	-0.0121895	-0.0479927	0.0725267	0.200049	0.193865	1.3527	0.0266698	0.10563	0.312086	2.99623	0.0645148	0.545504	-0.10609	-0.568654	0.103395	0.549114	0.0327584	0.134273	-0.0941218	-0.84337
NA	AHNAK	K2342k	NA		NA	NA	NA	NA	NA	NA	NA	NA	NA		-0.012224	-0.0337757	-0.0832792	-0.24382	0.0710552	0.200604
NA	AHNAK	K3601k	NA		NA	NA	NA	NA	NA	NA	NA	NA	NA		-0.216882	-0.678569	-0.272204	-0.781602	0.055322	0.249174	-0.0764533	-0.364904	0.361195	3.9108	0.157939	0.988974	-0.168874	-2.35411	0.079656	0.389215	-0.172029	-1.14071	-0.0533209	-0.236498	0.113082	1.10735
NA	AHNAK	K3616k	NA		NA	NA	NA	NA	NA	NA	NA	NA	NA		-0.216882	-0.678569	-0.272204	-0.781602	0.055322	0.249174	-0.0764533	-0.364904	0.361195	3.9108	0.157939	0.988974	-0.168874	-2.35411	0.079656	0.389215	-0.172029	-1.14071	-0.0533209	-0.236498	0.113082	1.10735
NA	AHNAK	K3681k	NA		NA	NA	NA	NA	NA	NA	NA	NA	NA		-0.216882	-0.678569	-0.272204	-0.781602	0.055322	0.249174	-0.0764533	-0.364904	0.361195	3.9108	0.157939	0.988974	-0.168874	-2.35411	0.079656	0.389215	-0.172029	-1.14071	-0.0533209	-0.236498	0.113082	1.10735
NA	AHNAK	K3727k	NA		NA	NA	NA	NA	NA	NA	NA	NA	NA		-0.216882	-0.678569	-0.272204	-0.781602	0.055322	0.249174	-0.0764533	-0.364904	0.361195	3.9108	0.157939	0.988974	-0.168874	-2.35411	0.079656	0.389215	-0.172029	-1.14071	-0.0533209	-0.236498	0.113082	1.10735
Q09666.LkSEDGVEGDLGETQSR	AHNAK	K134k	AHNAK.K134k		2.75	2.75	2.75	4.25			0.584963	1.36094	0.584963	-1.16363	0.0175238	0.0465186	-0.0446422	-0.190545	0.062166	0.262794	0.0240664	0.0943502	0.221555	1.67365	0.224718	1.71266	-0.076204	-0.686279	0.0130355	0.0493996	0.225308	1.74585	0.13593	0.804672	-0.0953742	-0.859734
Q09666.VSAPGVQGDVkGPQVALK	AHNAK	K530k	AHNAK.K530k		0.75		1.75	1	-2	-0.667218	-0.678072	-0.748885	-0.678072		-0.0846966	-0.430369	-0.151353	-1.14834	0.0666563	0.29996	-0.15811	-0.990571	0.00988329	0.0366185	-0.239668	-1.90375	-0.0648229	-0.549036	-0.278585	-2.4937	-0.143036	-0.866342	-0.218967	-1.66663	-0.0609024	-0.461969
NA	AHNAK	K3425k	NA		NA	NA	NA	NA	NA	NA	NA	NA	NA		0.358093	1.23572	0.240101	0.499171	0.117991	0.367217	0.0453452	0.192995	0.171618	1.12067	0.156473	0.975346	-0.0487244	-0.377044	-0.067607	-0.316214	-0.0589918	-0.267268	0.0630066	0.289744	-0.00387084	-0.0212467
NA	AHNAK	K1253k	NA		NA	NA	NA	NA	NA	NA	NA	NA	NA		0.017516	0.129876	-0.0360374	-0.280848	0.0535533	0.430548	-0.28287	-2.52084	-0.164113	-1.0474	-0.388882	-4.49591	-0.0458242	-0.348719	-0.129811	-0.753278	0.040776	0.172418	-0.196468	-1.4015	-0.0766447	-0.630302
NA	AHNAK	K1268k	NA		NA	NA	NA	NA	NA	NA	NA	NA	NA		0.017516	0.129876	-0.0360374	-0.280848	0.0535533	0.430548	-0.28287	-2.52084	-0.164113	-1.0474	-0.388882	-4.49591	-0.0458242	-0.348719	-0.129811	-0.753278	0.040776	0.172418	-0.196468	-1.4015	-0.0766447	-0.630302
Q09666.VPDVELkSAK	AHNAK	K855k	AHNAK.K855k				0.25	1.25		NA	1.58496	0.888034	1.58496	-0.893105	0.172308	2.79945	0.122716	1.14007	0.0495924	0.519722	0.248284	2.019	0.145707	0.878073	0.302338	2.83217	0.0395808	0.290412	0.128247	0.740397	0.047497	0.206073	0.169066	1.11096	0.036281	0.2408
NA	AHNAK	K4441k	NA		NA	NA	NA	NA	NA	NA	NA	NA	NA		0.0219589	0.0150869	-0.494126	-0.487028	0.516085	0.543807	-0.00285422	-0.010278	0.143316	0.857137	0.211793	1.55633	-0.0564023	-0.455911	-0.109984	-0.597393	0.141692	0.854518	0.119665	0.671499	-0.113078	-1.10729
NA	AHNAK	K4489k	NA		NA	NA	NA	NA	NA	NA	NA	NA	NA		0.0219589	0.0150869	-0.494126	-0.487028	0.516085	0.543807	-0.00285422	-0.010278	0.143316	0.857137	0.211793	1.55633	-0.0564023	-0.455911	-0.109984	-0.597393	0.141692	0.854518	0.119665	0.671499	-0.113078	-1.10729
NA	AHNAK	K4515k	NA		NA	NA	NA	NA	NA	NA	NA	NA	NA		0.0219589	0.0150869	-0.494126	-0.487028	0.516085	0.543807	-0.00285422	-0.010278	0.143316	0.857137	0.211793	1.55633	-0.0564023	-0.455911	-0.109984	-0.597393	0.141692	0.854518	0.119665	0.671499	-0.113078	-1.10729
NA	AHNAK	K2637k	NA		NA	NA	NA	NA	NA	NA	NA	NA	NA		0.078527	0.617234	-0.00413791	-0.0270633	0.0826649	0.627957	0.0209032	0.0809326	-0.140027	-0.828728	-0.0213132	-0.0826542	0.0620975	0.518125	-0.142336	-0.860174	-0.121137	-0.6831	-0.232198	-1.8342	-0.00952495	-0.0541066
NA	AHNAK	K2652k	NA		NA	NA	NA	NA	NA	NA	NA	NA	NA		0.078527	0.617234	-0.00413791	-0.0270633	0.0826649	0.627957	0.0209032	0.0809326	-0.140027	-0.828728	-0.0213132	-0.0826542	0.0620975	0.518125	-0.142336	-0.860174	-0.121137	-0.6831	-0.232198	-1.8342	-0.00952495	-0.0541066
NA	AHNAK	K2661k	NA		NA	NA	NA	NA	NA	NA	NA	NA	NA		0.078527	0.617234	-0.00413791	-0.0270633	0.0826649	0.627957	0.0209032	0.0809326	-0.140027	-0.828728	-0.0213132	-0.0826542	0.0620975	0.518125	-0.142336	-0.860174	-0.121137	-0.6831	-0.232198	-1.8342	-0.00952495	-0.0541066
NA	AHNAK	K2717k	NA		NA	NA	NA	NA	NA	NA	NA	NA	NA		0.078527	0.617234	-0.00413791	-0.0270633	0.0826649	0.627957	0.0209032	0.0809326	-0.140027	-0.828728	-0.0213132	-0.0826542	0.0620975	0.518125	-0.142336	-0.860174	-0.121137	-0.6831	-0.232198	-1.8342	-0.00952495	-0.0541066
NA	AHNAK	K2780k	NA		NA	NA	NA	NA	NA	NA	NA	NA	NA		0.078527	0.617234	-0.00413791	-0.0270633	0.0826649	0.627957	0.0209032	0.0809326	-0.140027	-0.828728	-0.0213132	-0.0826542	0.0620975	0.518125	-0.142336	-0.860174	-0.121137	-0.6831	-0.232198	-1.8342	-0.00952495	-0.0541066
NA	AHNAK	K2792k	NA		NA	NA	NA	NA	NA	NA	NA	NA	NA		0.078527	0.617234	-0.00413791	-0.0270633	0.0826649	0.627957	0.0209032	0.0809326	-0.140027	-0.828728	-0.0213132	-0.0826542	0.0620975	0.518125	-0.142336	-0.860174	-0.121137	-0.6831	-0.232198	-1.8342	-0.00952495	-0.0541066
NA	AHNAK	K2817k	NA		NA	NA	NA	NA	NA	NA	NA	NA	NA		0.078527	0.617234	-0.00413791	-0.0270633	0.0826649	0.627957	0.0209032	0.0809326	-0.140027	-0.828728	-0.0213132	-0.0826542	0.0620975	0.518125	-0.142336	-0.860174	-0.121137	-0.6831	-0.232198	-1.8342	-0.00952495	-0.0541066
NA	AHNAK	K2850k	NA		NA	NA	NA	NA	NA	NA	NA	NA	NA		0.078527	0.617234	-0.00413791	-0.0270633	0.0826649	0.627957	0.0209032	0.0809326	-0.140027	-0.828728	-0.0213132	-0.0826542	0.0620975	0.518125	-0.142336	-0.860174	-0.121137	-0.6831	-0.232198	-1.8342	-0.00952495	-0.0541066
NA	AHNAK	K2893k	NA		NA	NA	NA	NA	NA	NA	NA	NA	NA		0.078527	0.617234	-0.00413791	-0.0270633	0.0826649	0.627957	0.0209032	0.0809326	-0.140027	-0.828728	-0.0213132	-0.0826542	0.0620975	0.518125	-0.142336	-0.860174	-0.121137	-0.6831	-0.232198	-1.8342	-0.00952495	-0.0541066
NA	AHNAK	K2978k	NA		NA	NA	NA	NA	NA	NA	NA	NA	NA		0.078527	0.617234	-0.00413791	-0.0270633	0.0826649	0.627957	0.0209032	0.0809326	-0.140027	-0.828728	-0.0213132	-0.0826542	0.0620975	0.518125	-0.142336	-0.860174	-0.121137	-0.6831	-0.232198	-1.8342	-0.00952495	-0.0541066
Q09666.LDFEGPDAkLSGPSLK	AHNAK	K4898k	AHNAK.K4898k		0.25	0.25	2	0.75			-1.16993	-1.81269	-1.16993	-1.91062	0.0703553	0.836768	0.0272855	0.224511	0.0430698	0.66272	-0.240159	-1.91022	0.141735	0.843425	-0.257164	-2.14179	-0.14736	-1.87177	-0.337308	-3.50313	-0.0586563	-0.265416	-0.287026	-2.62631	-0.125198	-1.29479
NA	AHNAK	K3121k	NA		NA	NA	NA	NA	NA	NA	NA	NA	NA		-0.0485713	-0.492666	-0.166754	-0.992981	0.118182	0.737653	0.107953	0.574951	0.155704	0.968234	0.254869	2.10966	-0.0184254	-0.118862	0.330844	3.38176	-0.0519744	-0.229358	0.12509	0.714703	0.172001	2.16685
NA	AHNAK	K3149k	NA		NA	NA	NA	NA	NA	NA	NA	NA	NA		-0.0485713	-0.492666	-0.166754	-0.992981	0.118182	0.737653	0.107953	0.574951	0.155704	0.968234	0.254869	2.10966	-0.0184254	-0.118862	0.330844	3.38176	-0.0519744	-0.229358	0.12509	0.714703	0.172001	2.16685
NA	AHNAK	K3164k	NA		NA	NA	NA	NA	NA	NA	NA	NA	NA		-0.0485713	-0.492666	-0.166754	-0.992981	0.118182	0.737653	0.107953	0.574951	0.155704	0.968234	0.254869	2.10966	-0.0184254	-0.118862	0.330844	3.38176	-0.0519744	-0.229358	0.12509	0.714703	0.172001	2.16685
NA	AHNAK	K3201k	NA		NA	NA	NA	NA	NA	NA	NA	NA	NA		-0.0485713	-0.492666	-0.166754	-0.992981	0.118182	0.737653	0.107953	0.574951	0.155704	0.968234	0.254869	2.10966	-0.0184254	-0.118862	0.330844	3.38176	-0.0519744	-0.229358	0.12509	0.714703	0.172001	2.16685
NA	AHNAK	K3249k	NA		NA	NA	NA	NA	NA	NA	NA	NA	NA		-0.0485713	-0.492666	-0.166754	-0.992981	0.118182	0.737653	0.107953	0.574951	0.155704	0.968234	0.254869	2.10966	-0.0184254	-0.118862	0.330844	3.38176	-0.0519744	-0.229358	0.12509	0.714703	0.172001	2.16685
NA	AHNAK	K3275k	NA		NA	NA	NA	NA	NA	NA	NA	NA	NA		-0.0485713	-0.492666	-0.166754	-0.992981	0.118182	0.737653	0.107953	0.574951	0.155704	0.968234	0.254869	2.10966	-0.0184254	-0.118862	0.330844	3.38176	-0.0519744	-0.229358	0.12509	0.714703	0.172001	2.16685
NA	AHNAK	K3303k	NA		NA	NA	NA	NA	NA	NA	NA	NA	NA		-0.0485713	-0.492666	-0.166754	-0.992981	0.118182	0.737653	0.107953	0.574951	0.155704	0.968234	0.254869	2.10966	-0.0184254	-0.118862	0.330844	3.38176	-0.0519744	-0.229358	0.12509	0.714703	0.172001	2.16685
NA	AHNAK	K3308k	NA		NA	NA	NA	NA	NA	NA	NA	NA	NA		-0.0485713	-0.492666	-0.166754	-0.992981	0.118182	0.737653	0.107953	0.574951	0.155704	0.968234	0.254869	2.10966	-0.0184254	-0.118862	0.330844	3.38176	-0.0519744	-0.229358	0.12509	0.714703	0.172001	2.16685
NA	AHNAK	K1280k	NA		NA	NA	NA	NA	NA	NA	NA	NA	NA		0.0656441	0.74078	-0.057986	-0.282744	0.12363	0.957045	0.0230574	0.090036	-0.0825878	-0.402889	-0.0403827	-0.168659	0.0407649	0.301193	0.0588411	0.266435	-0.106714	-0.573215	0.00279499	0.0101583	0.0743838	0.604779
NA	AHNAK	K1319k	NA		NA	NA	NA	NA	NA	NA	NA	NA	NA		0.0656441	0.74078	-0.057986	-0.282744	0.12363	0.957045	0.0230574	0.090036	-0.0825878	-0.402889	-0.0403827	-0.168659	0.0407649	0.301193	0.0588411	0.266435	-0.106714	-0.573215	0.00279499	0.0101583	0.0743838	0.604779
NA	AHNAK	K1333k	NA		NA	NA	NA	NA	NA	NA	NA	NA	NA		0.0656441	0.74078	-0.057986	-0.282744	0.12363	0.957045	0.0230574	0.090036	-0.0825878	-0.402889	-0.0403827	-0.168659	0.0407649	0.301193	0.0588411	0.266435	-0.106714	-0.573215	0.00279499	0.0101583	0.0743838	0.604779
NA	AHNAK	K1353k	NA		NA	NA	NA	NA	NA	NA	NA	NA	NA		0.0656441	0.74078	-0.057986	-0.282744	0.12363	0.957045	0.0230574	0.090036	-0.0825878	-0.402889	-0.0403827	-0.168659	0.0407649	0.301193	0.0588411	0.266435	-0.106714	-0.573215	0.00279499	0.0101583	0.0743838	0.604779
NA	AHNAK	K1381k	NA		NA	NA	NA	NA	NA	NA	NA	NA	NA		0.0656441	0.74078	-0.057986	-0.282744	0.12363	0.957045	0.0230574	0.090036	-0.0825878	-0.402889	-0.0403827	-0.168659	0.0407649	0.301193	0.0588411	0.266435	-0.106714	-0.573215	0.00279499	0.0101583	0.0743838	0.604779
NA	AHNAK	K2349k	NA		NA	NA	NA	NA	NA	NA	NA	NA	NA		0.30329	0.568903	-0.147773	-0.192349	0.451063	0.97842	0.292362	2.66996	0.290307	2.63725	0.573145	10.0443	0.000792852	0.00456663	0.190221	1.33219	0.195687	1.39274	0.272052	2.39379	-0.00245586	-0.0133637
NA	AHNAK	K2368k	NA		NA	NA	NA	NA	NA	NA	NA	NA	NA		0.30329	0.568903	-0.147773	-0.192349	0.451063	0.97842	0.292362	2.66996	0.290307	2.63725	0.573145	10.0443	0.000792852	0.00456663	0.190221	1.33219	0.195687	1.39274	0.272052	2.39379	-0.00245586	-0.0133637
NA	AHNAK	K2396k	NA		NA	NA	NA	NA	NA	NA	NA	NA	NA		0.30329	0.568903	-0.147773	-0.192349	0.451063	0.97842	0.292362	2.66996	0.290307	2.63725	0.573145	10.0443	0.000792852	0.00456663	0.190221	1.33219	0.195687	1.39274	0.272052	2.39379	-0.00245586	-0.0133637
Q09666.APSLDIkGPEVDVSGPK	AHNAK	K3330k	AHNAK.K3330k		1	0.5	2.5	1.5	-0.736966	-0.740669	-0.652077	-1.30255	-0.652077	-0.574189	-0.119896	-1.83393	-0.186765	-1.94005	0.0668692	1.03501	0.0741626	0.351073	-0.0243837	-0.0957134	0.132636	0.766533	0.0380256	0.276448	-0.109722	-0.595445	0.272754	2.40441	-0.0398894	-0.168093	-0.171847	-2.16358
NA	AHNAK	K3452k	NA		NA	NA	NA	NA	NA	NA	NA	NA	NA		-0.0415749	-0.140273	-0.185073	-2.24936	0.143498	1.2464	-0.0363707	-0.149582	0.0635041	0.289207	0.0812138	0.394261	-0.0385383	-0.281027	-0.14973	-0.926421	-0.0159053	-0.0609771	-0.160627	-1.02838	-0.0601277	-0.454241
NA	AHNAK	K4751k	NA		NA	NA	NA	NA	NA	NA	NA	NA	NA		0.209302	0.487774	-0.268878	-0.746488	0.47818	1.55102	-0.00736759	-0.0270216	0.0198752	0.0766402	-0.0388375	-0.161248	-0.0105121	-0.0644941	-0.202646	-1.47186	0.0399941	0.168603	0.0185654	0.0719399	-0.109018	-1.04781
NA	AHNAK	K4779k	NA		NA	NA	NA	NA	NA	NA	NA	NA	NA		0.209302	0.487774	-0.268878	-0.746488	0.47818	1.55102	-0.00736759	-0.0270216	0.0198752	0.0766402	-0.0388375	-0.161248	-0.0105121	-0.0644941	-0.202646	-1.47186	0.0399941	0.168603	0.0185654	0.0719399	-0.109018	-1.04781
NA	AHNAK	K4794k	NA		NA	NA	NA	NA	NA	NA	NA	NA	NA		0.209302	0.487774	-0.268878	-0.746488	0.47818	1.55102	-0.00736759	-0.0270216	0.0198752	0.0766402	-0.0388375	-0.161248	-0.0105121	-0.0644941	-0.202646	-1.47186	0.0399941	0.168603	0.0185654	0.0719399	-0.109018	-1.04781
NA	AHNAK	K4806k	NA		NA	NA	NA	NA	NA	NA	NA	NA	NA		0.209302	0.487774	-0.268878	-0.746488	0.47818	1.55102	-0.00736759	-0.0270216	0.0198752	0.0766402	-0.0388375	-0.161248	-0.0105121	-0.0644941	-0.202646	-1.47186	0.0399941	0.168603	0.0185654	0.0719399	-0.109018	-1.04781
NA	AHNAK	K4831k	NA		NA	NA	NA	NA	NA	NA	NA	NA	NA		0.209302	0.487774	-0.268878	-0.746488	0.47818	1.55102	-0.00736759	-0.0270216	0.0198752	0.0766402	-0.0388375	-0.161248	-0.0105121	-0.0644941	-0.202646	-1.47186	0.0399941	0.168603	0.0185654	0.0719399	-0.109018	-1.04781
NA	AHNAK	K4859k	NA		NA	NA	NA	NA	NA	NA	NA	NA	NA		0.209302	0.487774	-0.268878	-0.746488	0.47818	1.55102	-0.00736759	-0.0270216	0.0198752	0.0766402	-0.0388375	-0.161248	-0.0105121	-0.0644941	-0.202646	-1.47186	0.0399941	0.168603	0.0185654	0.0719399	-0.109018	-1.04781
NA	AHNAK	K4864k	NA		NA	NA	NA	NA	NA	NA	NA	NA	NA		0.209302	0.487774	-0.268878	-0.746488	0.47818	1.55102	-0.00736759	-0.0270216	0.0198752	0.0766402	-0.0388375	-0.161248	-0.0105121	-0.0644941	-0.202646	-1.47186	0.0399941	0.168603	0.0185654	0.0719399	-0.109018	-1.04781
NA	AHNAK	K4879k	NA		NA	NA	NA	NA	NA	NA	NA	NA	NA		0.209302	0.487774	-0.268878	-0.746488	0.47818	1.55102	-0.00736759	-0.0270216	0.0198752	0.0766402	-0.0388375	-0.161248	-0.0105121	-0.0644941	-0.202646	-1.47186	0.0399941	0.168603	0.0185654	0.0719399	-0.109018	-1.04781
NA	AHNAK	K4905k	NA		NA	NA	NA	NA	NA	NA	NA	NA	NA		0.209302	0.487774	-0.268878	-0.746488	0.47818	1.55102	-0.00736759	-0.0270216	0.0198752	0.0766402	-0.0388375	-0.161248	-0.0105121	-0.0644941	-0.202646	-1.47186	0.0399941	0.168603	0.0185654	0.0719399	-0.109018	-1.04781
NA	AHNAK	K4926k	NA		NA	NA	NA	NA	NA	NA	NA	NA	NA		0.209302	0.487774	-0.268878	-0.746488	0.47818	1.55102	-0.00736759	-0.0270216	0.0198752	0.0766402	-0.0388375	-0.161248	-0.0105121	-0.0644941	-0.202646	-1.47186	0.0399941	0.168603	0.0185654	0.0719399	-0.109018	-1.04781
NA	AHNAK	K4985k	NA		NA	NA	NA	NA	NA	NA	NA	NA	NA		0.209302	0.487774	-0.268878	-0.746488	0.47818	1.55102	-0.00736759	-0.0270216	0.0198752	0.0766402	-0.0388375	-0.161248	-0.0105121	-0.0644941	-0.202646	-1.47186	0.0399941	0.168603	0.0185654	0.0719399	-0.109018	-1.04781
NA	AHNAK	K4992k	NA		NA	NA	NA	NA	NA	NA	NA	NA	NA		0.209302	0.487774	-0.268878	-0.746488	0.47818	1.55102	-0.00736759	-0.0270216	0.0198752	0.0766402	-0.0388375	-0.161248	-0.0105121	-0.0644941	-0.202646	-1.47186	0.0399941	0.168603	0.0185654	0.0719399	-0.109018	-1.04781
NA	AHNAK	K5072k	NA		NA	NA	NA	NA	NA	NA	NA	NA	NA		0.209302	0.487774	-0.268878	-0.746488	0.47818	1.55102	-0.00736759	-0.0270216	0.0198752	0.0766402	-0.0388375	-0.161248	-0.0105121	-0.0644941	-0.202646	-1.47186	0.0399941	0.168603	0.0185654	0.0719399	-0.109018	-1.04781
NA	AHNAK	K5725k	NA		NA	NA	NA	NA	NA	NA	NA	NA	NA		0.126656	1.39139	0.0188565	0.280156	0.1078	1.59661	0.144812	0.870208	0.139749	0.826343	0.372718	4.14789	0.00195398	0.0113406	0.142675	0.863155	0.0104594	0.0392252	0.0890748	0.450064	0.0594043	0.447072
NA	AHNAK	K5747k	NA		NA	NA	NA	NA	NA	NA	NA	NA	NA		0.126656	1.39139	0.0188565	0.280156	0.1078	1.59661	0.144812	0.870208	0.139749	0.826343	0.372718	4.14789	0.00195398	0.0113406	0.142675	0.863155	0.0104594	0.0392252	0.0890748	0.450064	0.0594043	0.447072
Q09666.VGGSGVNVNAkGLDLGGR	AHNAK	K263k	AHNAK.K263k		0.25	1.5	0.75	0.5	1.80735	0.831308	-0.415037	-0.171537	-0.415037	1.00598							0.0213073	0.0826294	-0.249394	-2.03413	-0.181208	-1.21794	0.104455	1.08655	0.0213849	0.083805	-0.153949	-0.965279	-0.0387431	-0.162542	0.0787777	0.654803
Q09666.LEGGEVDLkGPK	AHNAK	K4945k	AHNAK.K4945k		1	0.75	1.75	1.25	-0.321928	-0.407821	-0.415037	-0.223324	-0.415037	-0.114052															0.0534857	0.050072	-0.0951075	-0.158654	-0.117145	-0.180366	0.0619602	0.138872
Q09666.IkGDVPSVGLEGPDVDLQGPEAK	AHNAK	K5209k	AHNAK.K5209k		0.75	0.75	1.75	1.25			-0.415037	-0.311533	-0.415037	-0.311533							0.0154069	0.0583631	0.00150624	0.00539418	-0.0375062	-0.154927	0.00536378	0.031832	0.271104	2.3795	-0.0564283	-0.253218	0.109653	0.594932	0.147161	1.67377
Q09666.FNFSGSkVQTPEVDVK	AHNAK	K3363k	AHNAK.K3363k		1	1.5	3	2.5	0.485427	0.266619	-0.241008	-0.26967	-0.241008	0.569777
Q09666.IDVTAPDVSIEEPEGKLk	AHNAK	K802k	AHNAK.K802k		0.5	0.75	0.25	0.5	0.415037	0.136451	0.584963	0.26967	0.584963								-0.152169	-0.935859	-0.213901	-1.58127	-0.382833	-4.36353	0.0238205	0.158913	0.113758	0.625836	-0.136125	-0.806338	-0.083998	-0.416848	0.112273	1.09536
Q09666.VDIEGPDVNIEGPEGkLK	AHNAK	K2561k	AHNAK.K2561k		0.25	0.25	0.25	0.75			1	0.683964	1	-0.683964							-0.0579323	-0.258471	-0.00450715	-0.0163398	-0.24293	-1.94694	-0.0206149	-0.13482	0.101673	0.536777	0.0675984	0.316163	-0.114857	-0.63422	0.0153096	0.0900275
Q09666.EGAkDIDISSPEFK	AHNAK	K171k	AHNAK.K171k		0.75	0.5		0.5	-0.415037	-0.136451	1.58496	0.407821	1.58496	-0.481931							-0.0267786	-0.0793926	0.147095	0.451632	-0.122554	-0.392947	-0.0471133	-0.25765	-0.0910424	-0.369949	-0.0371524	-0.125604	-0.205078	-1.23145	-0.0276532	-0.133998
NA	AHNAK	K1184k	NA		NA	NA	NA	NA	NA	NA	NA	NA	NA								-0.13889	-0.819014	-0.194705	-1.36191	-0.404291	-4.84501	0.0215371	0.141661	-0.153726	-0.963208	-0.192244	-1.35443	-0.328414	-3.33681	0.017306	0.102977
NA	AHNAK	K1205k	NA		NA	NA	NA	NA	NA	NA	NA	NA	NA								-0.13889	-0.819014	-0.194705	-1.36191	-0.404291	-4.84501	0.0215371	0.141661	-0.153726	-0.963208	-0.192244	-1.35443	-0.328414	-3.33681	0.017306	0.102977
NA	AHNAK	K1210k	NA		NA	NA	NA	NA	NA	NA	NA	NA	NA								-0.13889	-0.819014	-0.194705	-1.36191	-0.404291	-4.84501	0.0215371	0.141661	-0.153726	-0.963208	-0.192244	-1.35443	-0.328414	-3.33681	0.017306	0.102977
NA	AHNAK	K1225k	NA		NA	NA	NA	NA	NA	NA	NA	NA	NA								-0.13889	-0.819014	-0.194705	-1.36191	-0.404291	-4.84501	0.0215371	0.141661	-0.153726	-0.963208	-0.192244	-1.35443	-0.328414	-3.33681	0.017306	0.102977
NA	AHNAK	K1396k	NA		NA	NA	NA	NA	NA	NA	NA	NA	NA								0.15461	0.958161	-0.0700547	-0.326747	0.138715	0.817518	0.0866907	0.824711	-0.0298933	-0.121161	0.200175	1.4435	0.106273	0.569994	-0.10337	-0.967747
NA	AHNAK	K1433k	NA		NA	NA	NA	NA	NA	NA	NA	NA	NA								-0.117735	-0.647951	0.222686	1.68754	0.036652	0.150903	-0.131357	-1.55244	-0.144844	-0.882376	-0.0181886	-0.0703734	-0.112131	-0.613508	-0.0569062	-0.422657
NA	AHNAK	K1461k	NA		NA	NA	NA	NA	NA	NA	NA	NA	NA								-0.117735	-0.647951	0.222686	1.68754	0.036652	0.150903	-0.131357	-1.55244	-0.144844	-0.882376	-0.0181886	-0.0703734	-0.112131	-0.613508	-0.0569062	-0.422657
NA	AHNAK	K1466k	NA		NA	NA	NA	NA	NA	NA	NA	NA	NA								-0.05622	-0.249243	0.210753	1.5441	-0.00878415	-0.032402	-0.103016	-1.06403	-0.0368316	-0.153382	0.129069	0.747157	-0.0540297	-0.240282	-0.0745393	-0.60652
NA	AHNAK	K1481k	NA		NA	NA	NA	NA	NA	NA	NA	NA	NA								-0.05622	-0.249243	0.210753	1.5441	-0.00878415	-0.032402	-0.103016	-1.06403	-0.0368316	-0.153382	0.129069	0.747157	-0.0540297	-0.240282	-0.0745393	-0.60652
NA	AHNAK	K1488k	NA		NA	NA	NA	NA	NA	NA	NA	NA	NA								-0.05622	-0.249243	0.210753	1.5441	-0.00878415	-0.032402	-0.103016	-1.06403	-0.0368316	-0.153382	0.129069	0.747157	-0.0540297	-0.240282	-0.0745393	-0.60652
NA	AHNAK	K1491k	NA		NA	NA	NA	NA	NA	NA	NA	NA	NA								0.0373469	0.154175	-0.160333	-1.01143	-0.20107	-1.43272	0.076278	0.687215	-0.388138	-4.55408	-0.209323	-1.54997	-0.248127	-2.04779	-0.0803414	-0.673026
NA	AHNAK	K1509k	NA		NA	NA	NA	NA	NA	NA	NA	NA	NA								0.0373469	0.154175	-0.160333	-1.01143	-0.20107	-1.43272	0.076278	0.687215	-0.388138	-4.55408	-0.209323	-1.54997	-0.248127	-2.04779	-0.0803414	-0.673026
NA	AHNAK	K1524k	NA		NA	NA	NA	NA	NA	NA	NA	NA	NA								0.130685	0.750496	0.0208421	0.0806765	0.134632	0.783105	0.0423846	0.31615	0.0645343	0.298449	0.04483	0.192533	0.161789	1.03957	0.00885312	0.050087
NA	AHNAK	K1536k	NA		NA	NA	NA	NA	NA	NA	NA	NA	NA								0.00592374	0.0189181	0.144874	0.844629	0.0441197	0.155399	-0.0603638	-0.450726	0.0663078	0.308661	-0.11438	-0.630576	0.0997129	0.522881	0.0811831	0.682928
NA	AHNAK	K1777k	NA		NA	NA	NA	NA	NA	NA	NA	NA	NA								-0.141318	-0.785964	0.132457	0.72872	-0.0186181	-0.0699661	-0.108009	-1.05836	-0.152352	-0.900859	0.0982017	0.489588	-0.0194297	-0.0728925	-0.112694	-1.04391
NA	AHNAK	K1791k	NA		NA	NA	NA	NA	NA	NA	NA	NA	NA								0.231001	1.79161	0.147899	0.897477	0.392073	4.56678	0.032066	0.224962	0.0602007	0.24068	0.162065	0.745542	0.216931	1.30022	-0.0364707	-0.189403
NA	AHNAK	K1818k	NA		NA	NA	NA	NA	NA	NA	NA	NA	NA								0.231001	1.79161	0.147899	0.897477	0.392073	4.56678	0.032066	0.224962	0.0602007	0.24068	0.162065	0.745542	0.216931	1.30022	-0.0364707	-0.189403
NA	AHNAK	K1837k	NA		NA	NA	NA	NA	NA	NA	NA	NA	NA								0.0621194	0.281467	0.150318	0.919125	0.245937	1.98724	-0.0340328	-0.2416	0.331562	2.74087	0.144091	0.829616	0.104053	0.441098	0.0625442	0.446408
NA	AHNAK	K1870k	NA		NA	NA	NA	NA	NA	NA	NA	NA	NA								0.0621194	0.281467	0.150318	0.919125	0.245937	1.98724	-0.0340328	-0.2416	0.331562	2.74087	0.144091	0.829616	0.104053	0.441098	0.0625442	0.446408
NA	AHNAK	K1904k	NA		NA	NA	NA	NA	NA	NA	NA	NA	NA								0.0621194	0.281467	0.150318	0.919125	0.245937	1.98724	-0.0340328	-0.2416	0.331562	2.74087	0.144091	0.829616	0.104053	0.441098	0.0625442	0.446408
NA	AHNAK	K2029k	NA		NA	NA	NA	NA	NA	NA	NA	NA	NA								0.0621194	0.281467	0.150318	0.919125	0.245937	1.98724	-0.0340328	-0.2416	0.331562	2.74087	0.144091	0.829616	0.104053	0.441098	0.0625442	0.446408
NA	AHNAK	K2132k	NA		NA	NA	NA	NA	NA	NA	NA	NA	NA								0.0621194	0.281467	0.150318	0.919125	0.245937	1.98724	-0.0340328	-0.2416	0.331562	2.74087	0.144091	0.829616	0.104053	0.441098	0.0625442	0.446408
NA	AHNAK	K2166k	NA		NA	NA	NA	NA	NA	NA	NA	NA	NA								0.0621194	0.281467	0.150318	0.919125	0.245937	1.98724	-0.0340328	-0.2416	0.331562	2.74087	0.144091	0.829616	0.104053	0.441098	0.0625442	0.446408
NA	AHNAK	K2194k	NA		NA	NA	NA	NA	NA	NA	NA	NA	NA								0.0621194	0.281467	0.150318	0.919125	0.245937	1.98724	-0.0340328	-0.2416	0.331562	2.74087	0.144091	0.829616	0.104053	0.441098	0.0625442	0.446408
NA	AHNAK	K2327k	NA		NA	NA	NA	NA	NA	NA	NA	NA	NA								0.194816	1.36312	-0.0229817	-0.0897136	0.192329	1.33596	0.0840406	0.788621	-0.229487	-1.61568	0.0336992	0.112231	-0.164245	-0.783427	-0.129444	-1.12264
NA	AHNAK	K2993k	NA		NA	NA	NA	NA	NA	NA	NA	NA	NA								0.163601	0.772281	0.0211667	0.065773	0.0593307	0.197775	0.0521574	0.32714	0.0875881	0.292335	-0.128686	-0.427825	0.0629915	0.19896	0.0947588	0.517209
NA	AHNAK	K3036k	NA		NA	NA	NA	NA	NA	NA	NA	NA	NA								0.163601	0.772281	0.0211667	0.065773	0.0593307	0.197775	0.0521574	0.32714	0.0875881	0.292335	-0.128686	-0.427825	0.0629915	0.19896	0.0947588	0.517209
NA	AHNAK	K3073k	NA		NA	NA	NA	NA	NA	NA	NA	NA	NA								-0.0945318	-0.480859	0.0736942	0.348269	-0.0200263	-0.0772687	-0.0649127	-0.550068	0.00827986	0.030777	0.0353979	0.146593	-0.0538709	-0.239432	-0.0121842	-0.0703263
NA	AHNAK	K3106k	NA		NA	NA	NA	NA	NA	NA	NA	NA	NA								-0.0945318	-0.480859	0.0736942	0.348269	-0.0200263	-0.0772687	-0.0649127	-0.550068	0.00827986	0.030777	0.0353979	0.146593	-0.0538709	-0.239432	-0.0121842	-0.0703263
NA	AHNAK	K3323k	NA		NA	NA	NA	NA	NA	NA	NA	NA	NA								0.138117	0.571176	-0.122599	-0.397185	0.0792196	0.265965	0.0980029	0.637678	0.214876	0.797416	0.1842	0.651412	0.231804	0.815688	0.0122348	0.0415701
NA	AHNAK	K3372k	NA		NA	NA	NA	NA	NA	NA	NA	NA	NA								0.307965	2.63875	-0.049675	-0.201694	0.283168	2.26078	0.133362	1.48541	1.26542	1.45578	0.761541	0.619704	0.665767	2.10335	0.219639	0.0905365
NA	AHNAK	K3374k	NA		NA	NA	NA	NA	NA	NA	NA	NA	NA								0.197531	1.39311	-0.143035	-0.85469	0.14233	0.848574	0.131413	1.5535	0.0809328	0.397267	-0.107643	-0.580043	0.0868923	0.435664	0.0847271	0.725329
NA	AHNAK	K3397k	NA		NA	NA	NA	NA	NA	NA	NA	NA	NA								0.197531	1.39311	-0.143035	-0.85469	0.14233	0.848574	0.131413	1.5535	0.0809328	0.397267	-0.107643	-0.580043	0.0868923	0.435664	0.0847271	0.725329
NA	AHNAK	K3430k	NA		NA	NA	NA	NA	NA	NA	NA	NA	NA								0.227523	1.74766	-0.266141	-2.27013	0.105159	0.554784	0.190488	2.90413	-0.0420628	-0.178742	-0.0428344	-0.182561	0.0155046	0.0593453	0.000346676	0.00186215
NA	AHNAK	K3473k	NA		NA	NA	NA	NA	NA	NA	NA	NA	NA
NA	AHNAK	K3488k	NA		NA	NA	NA	NA	NA	NA	NA	NA	NA								-0.15858	-0.994961	0.00694519	0.0254289	-0.178777	-1.1929	-0.0638704	-0.538149	-0.302976	-2.88807	-0.0226584	-0.0892472	-0.196677	-1.40384	-0.125947	-1.30687
NA	AHNAK	K3527k	NA		NA	NA	NA	NA	NA	NA	NA	NA	NA								-0.15858	-0.994961	0.00694519	0.0254289	-0.178777	-1.1929	-0.0638704	-0.538149	-0.302976	-2.88807	-0.0226584	-0.0892472	-0.196677	-1.40384	-0.125947	-1.30687
NA	AHNAK	K3573k	NA		NA	NA	NA	NA	NA	NA	NA	NA	NA								-0.15858	-0.994961	0.00694519	0.0254289	-0.178777	-1.1929	-0.0638704	-0.538149	-0.302976	-2.88807	-0.0226584	-0.0892472	-0.196677	-1.40384	-0.125947	-1.30687
NA	AHNAK	K4031k	NA		NA	NA	NA	NA	NA	NA	NA	NA	NA								-0.219506	-1.64864	-0.0255315	-0.100672	-0.349636	-3.6818	-0.074848	-0.669226	0.141333	0.851366	-0.10503	-0.560936	-0.0645	-0.298253	0.110691	1.07212
NA	AHNAK	K4139k	NA		NA	NA	NA	NA	NA	NA	NA	NA	NA								-0.219506	-1.64864	-0.0255315	-0.100672	-0.349636	-3.6818	-0.074848	-0.669226	0.141333	0.851366	-0.10503	-0.560936	-0.0645	-0.298253	0.110691	1.07212
NA	AHNAK	K4187k	NA		NA	NA	NA	NA	NA	NA	NA	NA	NA
NA	AHNAK	K4330k	NA		NA	NA	NA	NA	NA	NA	NA	NA	NA
NA	AHNAK	K4367k	NA		NA	NA	NA	NA	NA	NA	NA	NA	NA
NA	AHNAK	K4395k	NA		NA	NA	NA	NA	NA	NA	NA	NA	NA
NA	AHNAK	K4415k	NA		NA	NA	NA	NA	NA	NA	NA	NA	NA								0.0954303	0.486942	-0.138023	-0.811638	-0.0513111	-0.223352	0.0900816	0.871999	-0.293546	-2.73155	0.0999769	0.524744	-0.230573	-1.81315	-0.17681	-2.27064
NA	AHNAK	K4422k	NA		NA	NA	NA	NA	NA	NA	NA	NA	NA								0.253293	1.62908	-0.222721	-1.54984	-0.0115536	-0.03824	0.177511	2.21911	0.0531091	0.233485	-0.0916461	-0.454436	-0.214013	-1.57639	0.0645272	0.491027
NA	AHNAK	K4529k	NA		NA	NA	NA	NA	NA	NA	NA	NA	NA
NA	AHNAK	K4575k	NA		NA	NA	NA	NA	NA	NA	NA	NA	NA								-0.115265	-0.629164	-0.137552	-0.807648	-0.261467	-2.20278	0.00859972	0.0521166	-0.0187488	-0.0727039	-0.138519	-0.826896	-0.247041	-2.03282	0.053813	0.393155
NA	AHNAK	K5098k	NA		NA	NA	NA	NA	NA	NA	NA	NA	NA								-0.125462	-0.619677	0.100792	0.446255	0.147608	0.819372	-0.0880041	-0.719516	0.713892	1.23708	0.11322	0.168017	-0.222551	-0.254224	0.193788	0.349468
NA	AHNAK	K5137k	NA		NA	NA	NA	NA	NA	NA	NA	NA	NA								-0.125462	-0.619677	0.100792	0.446255	0.147608	0.819372	-0.0880041	-0.719516	0.713892	1.23708	0.11322	0.168017	-0.222551	-0.254224	0.193788	0.349468
NA	AHNAK	K5144k	NA		NA	NA	NA	NA	NA	NA	NA	NA	NA								-0.125462	-0.619677	0.100792	0.446255	0.147608	0.819372	-0.0880041	-0.719516	0.713892	1.23708	0.11322	0.168017	-0.222551	-0.254224	0.193788	0.349468
NA	AHNAK	K5163k	NA		NA	NA	NA	NA	NA	NA	NA	NA	NA								-0.125462	-0.619677	0.100792	0.446255	0.147608	0.819372	-0.0880041	-0.719516	0.713892	1.23708	0.11322	0.168017	-0.222551	-0.254224	0.193788	0.349468
NA	AHNAK	K5181k	NA		NA	NA	NA	NA	NA	NA	NA	NA	NA								-0.125462	-0.619677	0.100792	0.446255	0.147608	0.819372	-0.0880041	-0.719516	0.713892	1.23708	0.11322	0.168017	-0.222551	-0.254224	0.193788	0.349468
NA	AHNAK	K5183k	NA		NA	NA	NA	NA	NA	NA	NA	NA	NA								-0.125462	-0.619677	0.100792	0.446255	0.147608	0.819372	-0.0880041	-0.719516	0.713892	1.23708	0.11322	0.168017	-0.222551	-0.254224	0.193788	0.349468
NA	AHNAK	K5204k	NA		NA	NA	NA	NA	NA	NA	NA	NA	NA								-0.125462	-0.619677	0.100792	0.446255	0.147608	0.819372	-0.0880041	-0.719516	0.713892	1.23708	0.11322	0.168017	-0.222551	-0.254224	0.193788	0.349468
NA	AHNAK	K5230k	NA		NA	NA	NA	NA	NA	NA	NA	NA	NA								-0.125462	-0.619677	0.100792	0.446255	0.147608	0.819372	-0.0880041	-0.719516	0.713892	1.23708	0.11322	0.168017	-0.222551	-0.254224	0.193788	0.349468
NA	AHNAK	K5281k	NA		NA	NA	NA	NA	NA	NA	NA	NA	NA								-0.125462	-0.619677	0.100792	0.446255	0.147608	0.819372	-0.0880041	-0.719516	0.713892	1.23708	0.11322	0.168017	-0.222551	-0.254224	0.193788	0.349468
NA	AHNAK	K5307k	NA		NA	NA	NA	NA	NA	NA	NA	NA	NA								-0.125462	-0.619677	0.100792	0.446255	0.147608	0.819372	-0.0880041	-0.719516	0.713892	1.23708	0.11322	0.168017	-0.222551	-0.254224	0.193788	0.349468
NA	AHNAK	K5323k	NA		NA	NA	NA	NA	NA	NA	NA	NA	NA								-0.125462	-0.619677	0.100792	0.446255	0.147608	0.819372	-0.0880041	-0.719516	0.713892	1.23708	0.11322	0.168017	-0.222551	-0.254224	0.193788	0.349468
NA	AHNAK	K5831k	NA		NA	NA	NA	NA	NA	NA	NA	NA	NA																-1.70859	-0.817047	0.374474	0.169528	-1.72997	-0.601771	-0.864577	-0.652902
Q09666.VPDVDIkGPK	AHNAK	K1360k	AHNAK.K1360k				3	3		NA											0.0345324	0.141019	-0.0196754	-0.0758095	-0.0155863	-0.0590851	0.0209169	0.137052	-0.0687465	-0.322889	0.00511722	0.0187767	0.122122	0.690912	-0.033187	-0.216459
P35869.LASLLPFPQDVINKLDk	AHR	K66k	AHR.K66k		2	2	0.75	2.5		NA	1.45943	2.40257	1.45943	-2.0454	-0.95909	-4.70419	-0.357029	-2.48483	-0.602062	-2.18296	0.158627	0.995403	-0.0192465	-0.0740307	0.0970946	0.49829	0.0686353	0.593532	-0.297913	-2.28425	0.100161	0.42997	-0.185582	-1.17139	-0.17965	-1.87927
NA	AHR	K544k	NA		NA	NA	NA	NA	NA	NA	NA	NA	NA		0.0401022	0.253736	0.0242705	0.121952	0.0158317	0.0748688	0.0779621	0.374119	-0.238198	-1.88447	-0.0077438	-0.0284447	0.121996	1.3805	0.0997026	0.522809	-0.0257655	-0.102745	0.0104771	0.0392941	0.0563729	0.417513
NA	AHR	K560k	NA		NA	NA	NA	NA	NA	NA	NA	NA	NA		0.0401022	0.253736	0.0242705	0.121952	0.0158317	0.0748688	0.0779621	0.374119	-0.238198	-1.88447	-0.0077438	-0.0284447	0.121996	1.3805	0.0997026	0.522809	-0.0257655	-0.102745	0.0104771	0.0392941	0.0563729	0.417513
NA	AHR	K80k	NA		NA	NA	NA	NA	NA	NA	NA	NA	NA		0.100107	0.714897	0.0804269	0.544361	0.0196803	0.0928699									0.168863	1.10893	-0.0716943	-0.340376	0.170068	1.12098	0.108082	1.03432
NA	AHR	K283k	NA		NA	NA	NA	NA	NA	NA	NA	NA	NA		0.100107	0.714897	0.0804269	0.544361	0.0196803	0.0928699									0.168863	1.10893	-0.0716943	-0.340376	0.170068	1.12098	0.108082	1.03432
NA	AHR	K342k	NA		NA	NA	NA	NA	NA	NA	NA	NA	NA		0.100107	0.714897	0.0804269	0.544361	0.0196803	0.0928699									0.168863	1.10893	-0.0716943	-0.340376	0.170068	1.12098	0.108082	1.03432
NA	AHR	K24k	NA		NA	NA	NA	NA	NA	NA	NA	NA	NA		0.208538	0.16319	0.0416292	0.030284	0.166909	0.132155	-0.00766929	-0.0281625	-0.102028	-0.532555	-0.0543635	-0.239353	0.0364099	0.262173	-0.21345	-1.59933	-0.144458	-0.878944	-0.22784	-1.77804	-0.030998	-0.199686
P35869.TKnGTSGkDSATTSTLSK	AHR	K438k	AHR.K438k		0.25	0.5	0.5	0.25	0.584963	0.170176	-0.584963	-0.170176	-0.584963	-0.37964	0.0831949	0.380513	-0.171813	-0.265592	0.255008	0.425143	-0.0860553	-0.424974	-0.0790533	-0.380835	-0.0958335	-0.489681	-0.00270185	-0.0157583	-0.220163	-1.68142	0.0580744	0.262213	-0.118959	-0.66597	-0.125012	-1.2918
NA	AHR	K535k	NA		NA	NA	NA	NA	NA	NA	NA	NA	NA		-0.0798806	-0.485952	-0.17505	-1.25167	0.0951689	0.771739	-0.0352469	-0.144334	-0.141026	-0.837305	-0.186189	-1.27011	0.0408165	0.301666	-0.199164	-1.43197	0.10538	0.56348	-0.0802605	-0.39302	-0.136832	-1.4891
P35869.QVVVEPQQQLcQkMK	AHR	K641k	AHR.K641k		1.75	2.25	2	2	0.321928	0.683964				-0.855968	-0.156282	-1.98042	-0.239734	-2.64338	0.0834517	1.2586	0.132678	0.766884	0.139511	0.824316	0.360317	3.89308	-0.00263676	-0.0153721	0.166429	1.08482	-0.0463201	-0.200067	-0.00427156	-0.0156194	0.0955885	0.862549
P35869.HKLDFTPIGcDAkGR	AHR	K303k	AHR.K303k		0.25	0.25	0.5	0.25			-0.584963	-0.26967	-0.584963	-0.295831							0.00268752	0.00967113	0.225277	1.7196	0.205227	1.47998	-0.0858897	-0.813723	-0.297466	-2.79598	-0.0596448	-0.270885	-0.104253	-0.555302	-0.106853	-1.01675
P35869.TVKPIPAEGIkSNPSK	AHR	K32k	AHR.K32k		4.5	3.75	6.25	5.25	-0.247928	-0.494469	-0.241008	-0.667489	-0.241008	-0.177285							0.259298	2.17192	-0.0159557	-0.0605747	0.332029	3.34949	0.106211	1.11437	0.19239	1.35605	0.144787	0.881871	0.188626	1.31478	0.0213882	0.130355
P35869.SFFDVALkSSPTER	AHR	K88k	AHR.K88k		2	2.5	2.75	3	0.289507	0.740669	0.115477	0.407821	0.115477	-0.346609							0.0808962	0.392276	0.0961021	0.491509	0.176753	1.17225	-0.00586743	-0.0349351	-0.151412	-0.923021	-0.0823822	-0.404289	-0.071972	-0.337191	-0.030201	-0.190898
O95433.IPTckITLK	AHSA1	K208k	AHSA1.K208k		1	0.5	0.25	0.75	-0.736966	-0.740669	1	0.683964	1	-1.39347	0.0531809	0.376712	0.0307084	0.212033	0.0224725	0.150242	0.266138	2.27008	0.122158	0.682213	0.39152	4.55444	0.0555572	0.446951	0.258134	2.18877	-0.149918	-0.928133	0.149817	0.927206	0.183338	2.41599
NA	AHSA1	K94k	NA		NA	NA	NA	NA	NA	NA	NA	NA	NA		0.193906	0.642034	0.0567314	0.348708	0.137175	0.486672	-0.0316696	-0.127902	0.0447965	0.190263	0.0399025	0.166347	-0.0295057	-0.203816	0.0475186	0.206183	0.242476	1.97052	0.166049	1.08107	-0.0875944	-0.760481
NA	AHSG	K219k	NA		NA	NA	NA	NA	NA	NA	NA	NA	NA								0.0542157	0.185145	-0.0228	-0.0804108	-0.0340627	-0.107271	0.026752	0.157741	0.131325	0.413568	-0.0388905	-0.0904268	0.234071	0.962182	0.0969233	0.393676
NA	AHSP	K84k	NA		NA	NA	NA	NA	NA	NA	NA	NA	NA		-0.0778345	-0.1217	0.00266283	0.00586055	-0.0804974	-0.167656	-0.120132	-0.666427	-0.0454216	-0.193376	-0.196646	-1.3833	-0.0288283	-0.198319	-0.271895	-2.39142	0.0978352	0.509709	-0.0396849	-0.1671	-0.16612	-2.04369
NA	AHSP	K5k	NA		NA	NA	NA	NA	NA	NA	NA	NA	NA								0.0542157	0.185145	-0.0228	-0.0804108	-0.0340627	-0.107271	0.026752	0.157741	0.131325	0.413568	-0.0388905	-0.0904268	0.234071	0.962182	0.0969233	0.393676
NA	AIF1	K76k	NA		NA	NA	NA	NA	NA	NA	NA	NA	NA								-0.165814	-1.06379	-0.254128	-2.09935	-0.406363	-4.89329	0.0340775	0.241983	-0.0653485	-0.303123	-0.0247049	-0.0981021	-0.0909745	-0.462746	-0.0182612	-0.109274
O95831.ATAQDNPkSATEQSGTGIR	AIFM1	K518k	AIFM1.K518k		0.25	0.5	1.5	1	0.584963	0.26967	-0.485427	-0.740669	-0.485427	-1.09415	-0.163233	-1.2278	-0.0115608	-0.122939	-0.151672	-2.67694	-0.134904	-0.78538	-0.204675	-1.47366	-0.294675	-2.70706	0.0269222	0.183063	-0.190203	-1.332	-0.0987386	-0.516029	-0.192967	-1.36242	-0.0410952	-0.280169
O95831.ELWFSDDPNVTkTLR	AIFM1	K189k	AIFM1.K189k		0.75	0.5	0.75	1.25	-0.415037	-0.26967	0.584963	0.396592	0.584963	-1.00815	0.0310007	0.189316	-0.016505	-0.0728401	0.0475057	0.216441	0.0159153	0.0604115	0.00976532	0.0361642	0.0969387	0.497223	0.00237306	0.0138109	0.0932939	0.478419	0.18826	1.31082	0.06647	0.3096	-0.0426685	-0.293434
O95831.LNDGSQITYEkcLIATGGTPR	AIFM1	K255k	AIFM1.K255k		1.5	1	0.75	1	-0.485427	-0.443709	0.321928	0.195439	0.321928	-0.786465							-0.014453	-0.0545415	0.0358471	0.147132	-0.0290235	-0.116015	-0.0194091	-0.125982	-0.133973	-0.788062	0.0592179	0.268518	-0.037119	-0.154752	-0.0868006	-0.750672
O95831.ISGLGLTPEQKQk	AIFM1	K111k	AIFM1.K111k		2.25	2.25	2.75	4			0.5025	1.0208	0.5025	-1.0208							-0.0822619	-0.400836	-0.166468	-1.07013	-0.175852	-1.16311	0.0324924	0.22854	0.0277488	0.111524	-0.0931884	-0.477701	-0.072634	-0.346018	0.0543371	0.398098
Q9BRQ8.QEVkEILLR	AIFM2	K193k	AIFM2.K193k		2.5	2	2.5	2	-0.289507	-0.204865	-0.289507	-0.443709	-0.289507		0.19158	0.55737	0.367595	1.23406	-0.176015	-0.38523	0.0601908	0.270798	0.20959	1.53048	0.152905	0.942562	-0.057648	-0.469246	0.071897	0.341591	0.149015	0.919911	0.132447	0.775226	-0.0346493	-0.22787
Q9BRQ8.DLFVSTSWkTMR	AIFM2	K366k	AIFM2.K366k		1	0.5	0.25	0.25	-0.736966	-0.443709				-0.621125	-0.307988	-1.88322	-0.319565	-1.49857	0.0115772	0.0347172	0.435717	5.6127	0.0266716	0.105638	0.543081	8.89964	0.157837	2.09884
Q9BRQ8.ASVETGFAKk	AIFM2	K64k	AIFM2.K64k		2	2	2.5	1.5			-0.652077	-1.30255	-0.652077	0.583332	-0.134954	-1.66132	-0.186957	-2.01791	0.0520022	0.563808	0.135621	0.79138	0.0236045	0.0923712	0.155296	0.964465	0.0432233	0.32399	-0.0961152	-0.497763	0.113743	0.625721	-0.0666571	-0.310685	-0.0942895	-0.845552
Q9BRQ8.kGVQLLLSER	AIFM2	K199k	AIFM2.K199k		4.25	4.5	3.5	2.75	0.0780025	0.170176	-0.321928	-0.623013	-0.321928	0.701641
NA	AIMP1	K336k	NA		NA	NA	NA	NA	NA	NA	NA	NA	NA		0.469866	2.62049	0.406676	1.84156	0.0631905	0.0374955	0.0949086	0.443927	0.166158	1.02279	0.169694	1.02667	-0.0308215	-0.20406	0.0611804	0.203942	0.0428654	0.114066	0.160821	0.769334	0.0181725	0.0689053
NA	AIMP1	K24k	NA		NA	NA	NA	NA	NA	NA	NA	NA	NA								-0.165814	-1.06379	-0.254128	-2.09935	-0.406363	-4.89329	0.0340775	0.241983	-0.0653485	-0.303123	-0.0247049	-0.0981021	-0.0909745	-0.462746	-0.0182612	-0.109274
Q13155.LYELkAAVDGLSK	AIMP2	K70k	AIMP2.K70k		1.5	1.5	0.75	1			0.321928	0.407821	0.321928	-0.18612	0.109057	0.909268	0.0176381	0.18588	0.0914185	2.02404	-0.0958424	-0.489742	0.251291	2.06012	0.0524693	0.229385	-0.133947	-1.60192	0.161671	1.03843	0.0727674	0.346822	-0.0379265	-0.158614	0.0399445	0.270592
Q13155.ScENLAPFNTALkLLK	AIMP2	K317k	AIMP2.K317k		1.75	1.5	1.5	1.75	-0.192645	-0.13266	0.192645	0.26967	0.192645	-0.291384							-0.203898	-1.24856	0.0957452	0.396058	-0.138569	-0.704475	-0.119412	-1.08306	0.0489261	0.177239	-0.00388529	-0.0121473	-0.0333311	-0.112149	0.0224459	0.118914
NA	AIP	K273k	NA		NA	NA	NA	NA	NA	NA	NA	NA	NA		-0.0519772	-0.0890784	0.128942	0.399212	-0.180919	-0.431249	-0.103662	-0.544112	0.223351	1.69575	0.143014	0.854509	-0.126184	-1.4561	0.152118	0.948314	0.0104968	0.0393715	0.144946	0.88329	0.0636303	0.489587
O00170.YYDAIAcLkNLQMK	AIP	K210k	AIP.K210k		1	1	0.5	1.25			1	0.623013	1	-0.553925	0.150521	0.436297	0.197096	0.644398	-0.0465747	-0.0228641	-0.0788104	-0.379336	-0.000334357	-0.00119168	-0.0178221	-0.0681652	-0.0302812	-0.210161	0.0557914	0.249763	0.0597768	0.271617	0.018963	0.0735978	-0.00179065	-0.00970425
NA	AIP	K196k	NA		NA	NA	NA	NA	NA	NA	NA	NA	NA		0.469866	2.62049	0.406676	1.84156	0.0631905	0.0374955	0.0949086	0.443927	0.166158	1.02279	0.169694	1.02667	-0.0308215	-0.20406	0.0611804	0.203942	0.0428654	0.114066	0.160821	0.769334	0.0181725	0.0689053
O00170.NIAVGkDPLEGQR	AIP	K112k	AIP.K112k			0.25	0.75	1	1	0.407821	0.321928	0.407821	0.321928		0.0149696	0.0341462	-0.041896	-0.219943	0.0568656	0.28806	0.0613362	0.277118	0.205991	1.48877	0.2823	2.51205	-0.0558175	-0.449704	0.0675759	0.316032	-0.136223	-0.807171	0.0579437	0.261495	0.0915668	0.810447
NA	AIP	K266k	NA		NA	NA	NA	NA	NA	NA	NA	NA	NA
NA	AJUBA	K340k	NA		NA	NA	NA	NA	NA	NA	NA	NA	NA		-0.0519772	-0.0890784	0.128942	0.399212	-0.180919	-0.431249	-0.103662	-0.544112	0.223351	1.69575	0.143014	0.854509	-0.126184	-1.4561	0.152118	0.948314	0.0104968	0.0393715	0.144946	0.88329	0.0636303	0.489587
NA	AK1	K163k	NA		NA	NA	NA	NA	NA	NA	NA	NA	NA		-0.0639175	-0.878397	-0.0610089	-0.941377	-0.00290859	-0.0791435	0.0370161	0.152615	0.0703075	0.328227	0.156919	0.979485	-0.012846	-0.0799977	0.0666945	0.310902	0.0727055	0.346449	0.0606122	0.27627	-0.00270073	-0.0147183
NA	AK1	K182k	NA		NA	NA	NA	NA	NA	NA	NA	NA	NA		-0.0639175	-0.878397	-0.0610089	-0.941377	-0.00290859	-0.0791435	0.0370161	0.152615	0.0703075	0.328227	0.156919	0.979485	-0.012846	-0.0799977	0.0666945	0.310902	0.0727055	0.346449	0.0606122	0.27627	-0.00270073	-0.0147183
P54819.APSVPAAEPEYPkGIR	AK2	K14k	AK2.K14k		2.5	2.75	2.75	2.5	0.125531	0.170176	-0.125531	-0.26967	-0.125531	-0.621125	-0.0898494	-0.191775	-0.162825	-0.350502	0.0729758	0.139727	0.0318607	0.128769	0.415217	5.10321	0.34561	3.60407	-0.147924	-1.88362	0.0106902	0.0401284	0.299169	2.82425	0.208862	1.54452	-0.129614	-1.36686
P54819.QAEMLDDLMEkR	AK2	K117k	AK2.K117k		2	1.5	1.5	1.75	-0.36257	-0.407821	0.192645	0.26967	0.192645	-0.611516	0.299989	1.55556	0.263625	1.06699	0.0363638	0.196586	0.000915578	0.00327097	0.290752	2.64431	0.24589	1.98659	-0.111838	-1.20589	0.0943744	0.485791	-0.0437715	-0.187226	0.203745	1.48456	0.062069	0.473702
P54819.AMVASGSELGKk	AK2	K63k	AK2.K63k		0.25	1	0.25		1.32193	0.748885	-1	-0.407821	-1	1.03753	0.162208	0.628203	0.0844677	0.18598	0.0777402	0.318498	0.00726899	0.0266493	-0.0566079	-0.251325	0.05539	0.244807	0.0246479	0.165275	-0.257485	-2.17946	-0.113469	-0.623633	-0.182111	-1.24494	-0.0647065	-0.50066
P54819.AVLLGPPGAGkGTQAPR	AK2	K28k	AK2.K28k		2	3.25	1.75	2	0.63743	1.09906	0.169925	0.407821	0.169925	0.893105							-0.138082	-0.812139	-0.0466558	-0.19956	-0.153663	-0.949477	-0.0352782	-0.252315	0.126689	0.727661	-0.107016	-0.575434	0.00662871	0.0244739	0.105004	0.990583
P54819.NLETPLcknGFLLDGFPR	AK2	K93k	AK2.K93k		4.75	4.25	2.75	4.25	-0.152003	-0.396592	0.584963	0.752081	0.584963	-2.88249							-0.152169	-0.935859	-0.213901	-1.58127	-0.382833	-4.36353	0.0238205	0.158913	0.113758	0.625836	-0.136125	-0.806338	-0.083998	-0.416848	0.112273	1.09536
Q9UIJ7.AYEDQTKPVLEYYQKk	AK3	K190k	AK3.K190k		1.75	2	0.25	0.75	0.169925	0.123761	1	0.396592	1	-0.151697	0.000566633	0.00241168	-0.00983349	-0.070416	0.0104001	0.0443484	0.257644	2.14855	0.262112	2.212	0.566565	9.78389	-0.00172387	-0.00999004	0.157077	0.994587	0.169578	1.11608	0.265021	2.2889	-0.00561713	-0.0311621
Q9Y3D8.SGLkYINVGDLAR	AK6	K30k	AK6.K30k		1	2	2.75	2	0.847997	1.03753	-0.415037	-1.23906	-0.415037	1.63203							0.247972	2.01476	0.141271	0.839421	0.336671	3.43521	0.041172	0.304929	0.372715	2.8853	0.0143907	0.0415238	0.108337	0.405132	0.166397	1.40443
Q9Y3D8.TTLGkELASK	AK6	K21k	AK6.K21k		0.75	1	0.25	0.5	0.321928	0.204865	0.584963	0.26967	0.584963								-0.0847896	-0.416861	0.105336	0.556056	0.0401092	0.167341	-0.0733631	-0.650772	0.0352172	0.145742	-0.173987	-1.16059	-0.0332773	-0.136677	0.0939956	0.841729
Q92667.YVDYGGYkR	AKAP1	K800k	AKAP1.K800k		1	0.5	2	1	-0.736966	-0.443709	-0.847997	-1.03753	-0.847997	-0.740669	0.132716	0.938497	0.068182	0.264757	0.0645344	0.300488	-0.136303	-0.797113	-0.0449795	-0.191173	-0.258553	-2.16136	-0.0352388	-0.251974	-0.0971853	-0.505182	0.0427088	0.181938	-0.0813855	-0.400136	-0.0628545	-0.481668
Q92667.YVSFLkQTSGAK	AKAP1	K634k	AKAP1.K634k		0.75	0.75	0.5	0.5							0.301777	0.914144	-1.03039	-0.528998	1.33216	3.44016	0.0538799	0.236797	0.146878	0.888407	0.267107	2.28419	-0.0358846	-0.257583	-0.109674	-0.59509	0.139446	0.834916	-0.149408	-0.923484	-0.11193	-1.0903
O43572.LMkSIEQDAVNTFTK	AKAP10	K292k	AKAP10.K292k		1	1	0.25	0.5			0.584963	0.26967	0.584963	-0.196007	-0.604725	-2.46176	0.200724	0.150817	-0.805449	-1.53445	-0.0414998	-0.174065	-0.0575619	-0.256466	-0.162557	-1.03252	0.0061978	0.0369814	0.126769	0.728313	-0.0442329	-0.189535	0.0459471	0.198174	0.0768311	0.632427
O43572.SIEQDAVNTFTkYISPDAAK	AKAP10	K304k	AKAP10.K304k		0.5		0.25	0.5	-1.58496	-0.740669	0.584963	0.26967	0.584963	-1.09415	-0.313052	-2.01697	-0.232938	-1.97835	-0.0801138	-0.606486	-0.205699	-1.48541	-0.226842	-1.73913	-0.427168	-5.39618	0.00815836	0.0493013	-0.26916	-2.35032	0.0935377	0.480078	-0.110304	-0.599788	-0.16296	-1.97918
O43572.kGQYDGQEAQNDAMILYDK	AKAP10	K423k	AKAP10.K423k			0.5	0.25	0.25	1.58496	0.740669				-0.621125	0.00818726	0.0633201	0.057511	0.647673	-0.0493237	-0.503061	0.189728	1.30785	-0.0773409	-0.370315	0.185634	1.26423	0.103053	1.06461	0.160965	1.03163	0.221308	1.69564	0.155704	0.981667	-0.0271122	-0.170814
O43572.MIVSDIMQQAQYDQPLEkSTK	AKAP10	K658k	AKAP10.K658k		1	0.25		0.25	-1.32193	-0.526047	1	0.407821	1	-1.52259	0.0531809	0.376712	0.0307084	0.212033	0.0224725	0.150242	0.266138	2.27008	0.122158	0.682213	0.39152	4.55444	0.0555572	0.446951	0.258134	2.18877	-0.149918	-0.928133	0.149817	0.927206	0.183338	2.41599
O43572.YISPDAAkPIPITEAMR	AKAP10	K312k	AKAP10.K312k		1.75	2.5	0.75	1.5	0.459432	0.623013	0.807355	0.623013	0.807355		0.173429	1.03723	0.0947852	0.494872	0.0786443	0.327151	0.0355773	0.145873	0.186191	1.27012	0.282224	2.51087	-0.0581167	-0.474303	-0.154284	-0.968398	0.207614	1.52977	0.112355	0.615195	-0.162601	-1.97192
O43572.kWVQGNTDEAQEELAWK	AKAP10	K621k	AKAP10.K621k		1	1.5		0.25	0.485427	0.328714	1	0.407821	1	-0.170176	-0.0192306	-0.126251	-0.168719	-0.867043	0.149488	0.762293	0.306734	2.90547	0.158728	0.996347	0.54949	9.13419	0.0571106	0.463475	0.278544	2.49306	0.121252	0.684017	0.327557	3.32104	0.070671	0.563857
O43572.ScLDYQTQETkSSLSK	AKAP10	K119k	AKAP10.K119k				0.75	0.75		NA					0.301777	0.914144	-1.03039	-0.528998	1.33216	3.44016	0.0538799	0.236797	0.146878	0.888407	0.267107	2.28419	-0.0358846	-0.257583	-0.109674	-0.59509	0.139446	0.834916	-0.149408	-0.923484	-0.11193	-1.0903
NA	AKAP12	K517k	NA		NA	NA	NA	NA	NA	NA	NA	NA	NA		-0.0486383	-0.40977	0.00671184	0.0384125	-0.0553501	-0.572579	-0.170978	-1.11433	-0.278051	-2.44706	-0.318373	-3.105	0.0413158	0.306253	-0.269338	-2.35298	-0.168354	-1.10387	-0.175981	-1.18101	-0.0453719	-0.316693
NA	AKAP12	K526k	NA		NA	NA	NA	NA	NA	NA	NA	NA	NA		-0.0501347	-0.491805	-0.1186	-0.881753	0.0684649	0.553308	0.156995	0.980192	-0.100025	-0.51853	0.0923619	0.466295	0.0991755	1.00506	-0.199059	-1.43078	0.163136	1.0526	0.0372322	0.155291	-0.162734	-1.97462
NA	AKAP12	K1274k	NA		NA	NA	NA	NA	NA	NA	NA	NA	NA		-0.0501347	-0.491805	-0.1186	-0.881753	0.0684649	0.553308	0.156995	0.980192	-0.100025	-0.51853	0.0923619	0.466295	0.0991755	1.00506	-0.199059	-1.43078	0.163136	1.0526	0.0372322	0.155291	-0.162734	-1.97462
NA	AKAP12	K1548k	NA		NA	NA	NA	NA	NA	NA	NA	NA	NA		-0.157414	-0.564597	-0.340222	-1.37336	0.182808	0.666947	0.16245	1.0315	-0.0402036	-0.167796	0.197466	1.39239	0.0781972	0.711694	0.174182	1.16258	0.00148177	0.00535637	-0.0795366	-0.388465	0.0775942	0.641158
NA	AKAP12	K177k	NA		NA	NA	NA	NA	NA	NA	NA	NA	NA								-0.102166	-0.533525	0.104701	0.551513	-0.00792067	-0.0291152	-0.079823	-0.732734	0.181957	1.24331	0.101898	0.538385	0.122895	0.697079	0.0359704	0.238323
NA	AKAP12	K182k	NA		NA	NA	NA	NA	NA	NA	NA	NA	NA								-0.102166	-0.533525	0.104701	0.551513	-0.00792067	-0.0291152	-0.079823	-0.732734	0.181957	1.24331	0.101898	0.538385	0.122895	0.697079	0.0359704	0.238323
NA	AKAP12	K297k	NA		NA	NA	NA	NA	NA	NA	NA	NA	NA								0.00719092	0.0258201	-0.208929	-1.51402	-0.172804	-1.11735	0.0848767	0.784824	-0.144677	-0.838266	-4.17551e-05	-0.000145635	-0.119314	-0.643642	-0.0647862	-0.48008
NA	AKAP7	K267k	NA		NA	NA	NA	NA	NA	NA	NA	NA	NA		-0.157414	-0.564597	-0.340222	-1.37336	0.182808	0.666947	0.16245	1.0315	-0.0402036	-0.167796	0.197466	1.39239	0.0781972	0.711694	0.174182	1.16258	0.00148177	0.00535637	-0.0795366	-0.388465	0.0775942	0.641158
Q99996.LLEkQYqEQLEEEVAK	AKAP9	K1434k	AKAP9.K1434k		1	1	1.75	0.75			-1	-0.888034	-1	0.633786	-0.256772	-1.961	-0.193498	-1.32207	-0.0632746	-0.287757	-0.120508	-0.669342	0.152057	0.934847	-0.0274489	-0.109048	-0.105174	-1.0979	0.138476	0.826526	0.0646468	0.299094	-0.0157778	-0.0604571	0.0331717	0.216341
NA	AKAP9	K1147k	NA		NA	NA	NA	NA	NA	NA	NA	NA	NA		-0.157414	-0.564597	-0.340222	-1.37336	0.182808	0.666947	0.16245	1.0315	-0.0402036	-0.167796	0.197466	1.39239	0.0781972	0.711694	0.174182	1.16258	0.00148177	0.00535637	-0.0795366	-0.388465	0.0775942	0.641158
Q99996.LQVLPQkASER	AKAP9	K3532k	AKAP9.K3532k			0.5	0.75	1.75	1.58496	0.740669	1	1.52259	1	-0.621125	0.179349	0.297737	-0.219651	-0.675169	0.399	0.974483	-0.0382946	-0.158664	0.174459	1.14906	0.166914	1.07445	-0.0820943	-0.762595	0.031122	0.0401792	0.104982	0.0489733	0.219952	0.303581	0.0165908	0.0216657
NA	AKAP9	K1468k	NA		NA	NA	NA	NA	NA	NA	NA	NA	NA								-0.131605	-0.758037	0.264298	2.24343	0.036593	0.150625	-0.152765	-1.9871	-0.0569832	-0.256239	-0.28338	-2.56854	-0.0613625	-0.28047	0.10172	0.944955
Q99996.ELNVLkSEQNDLR	AKAP9	K1103k	AKAP9.K1103k		0.5		0.25	0.25	-1.58496	-0.740669				-0.855968
P14550.EELFVTSkLWNTK	AKR1A1	K80k	AKR1A1.K80k		0.5	0.5		0.5			1.58496	0.740669	1.58496	-0.574189	0.0959082	0.289736	0.300706	1.0493	-0.204797	-0.805065	0.0133604	0.050198	0.0484233	0.208506	0.12528	0.706873	-0.0135296	-0.0846222	-0.106197	-0.569437	0.117361	0.65352	0.008546	0.0318007	-0.100445	-0.927519
NA	AKR1A1	K85k	NA		NA	NA	NA	NA	NA	NA	NA	NA	NA		-0.148477	-0.587982	-0.155244	-0.679279	0.00676686	0.131837	-0.0675129	-0.311999	-0.245887	-1.98655	-0.350491	-3.69843	0.0688283	0.595824	-0.0307797	-0.125188	-0.143034	-0.866323	-0.0801206	-0.392138	0.0504358	0.361859
P14550.YIVPMLTVDGkR	AKR1A1	K308k	AKR1A1.K308k		1.25	2.25	2.75	1.25	0.736966	0.888034	-1	-2.26568	-1	2.13721	0.0703553	0.836768	0.0272855	0.224511	0.0430698	0.66272	-0.240159	-1.91022	0.141735	0.843425	-0.257164	-2.14179	-0.14736	-1.87177	-0.337308	-3.50313	-0.0586563	-0.265416	-0.287026	-2.62631	-0.125198	-1.29479
P14550.HIDcAAIYGNEPEIGEALkEDVGPGK	AKR1A1	K61k	AKR1A1.K61k		0.75	0.75	0.5	0.25			-0.584963	-0.170176	-0.584963	-0.177285							-0.218694	-1.63879	-0.0703952	-0.32874	-0.245712	-1.9842	-0.0572236	-0.464687	-0.146105	-0.893644	-0.0393998	-0.165716	-0.00178772	-0.00647048	-0.0479426	-0.339359
NA	AKR1A1	K30k	NA		NA	NA	NA	NA	NA	NA	NA	NA	NA								-0.240524	-1.77189	0.0237023	0.0909479	-0.312624	-2.90651	-0.098007	-0.950902	-0.195129	-1.37287	0.048685	0.206933	-0.0942312	-0.477106	-0.110052	-1.04444
P15121.HIDcAHVYQNENEVGVAIQEkLR	AKR1B1	K62k	AKR1B1.K62k		1.5	0.5	0.5		-1.22239	-0.419468	-1.58496	-0.407821	-1.58496	-0.740669	0.0183229	0.0827261	0.213826	1.57141	-0.195503	-1.56723	-0.239121	-1.89656	-0.16529	-1.05873	-0.440139	-5.72703	-0.0284888	-0.195579	-0.119856	-0.673005	-0.0658152	-0.305813	-0.205873	-1.50934	-0.0242808	-0.150495
P15121.MPILGLGTWkSPPGQVTEAVK	AKR1B1	K22k	AKR1B1.K22k		2.75	2.5	3	2	-0.125531	-0.136451	-0.530515	-0.872978	-0.530515	0.535987	0.0280945	0.174269	-0.0110212	-0.0576707	0.0391158	0.226084	0.203723	1.46279	0.251335	2.06073	0.390735	4.53697	-0.018372	-0.118478	0.199628	1.43726	-0.0489629	-0.213619	0.0475069	0.206124	0.111692	1.0868
P15121.HNkTTAQVLIR	AKR1B1	K243k	AKR1B1.K243k		5.5	6.25	4.25	5	0.176878	0.409386	0.222392	0.526047	0.222392		0.210694	1.56811	0.180652	0.713549	0.0300421	0.248709	-0.163872	-1.04509	-0.213534	-1.57692	-0.328836	-3.29131	0.019163	0.124193	-0.175468	-1.17574	-0.120645	-0.679213	-0.190946	-1.34014	-0.0246321	-0.152984
P15121.YkPAVNQIEcHPYLTQEK	AKR1B1	K179k	AKR1B1.K179k		5.25	6	2.75	3	0.184425	0.302864	0.115477	0.407821	0.115477	-0.346609	0.241455	1.18838	0.106112	0.352133	0.135343	0.434774	0.236835	1.86668	0.0982073	0.505937	0.322841	3.18375	0.0534919	0.425346	0.25767	2.18212	-0.0919469	-0.469292	0.0644038	0.297702	0.157083	1.86227
P15121.GIVVTAYSPLGSPDRPWAkPEDPSLLEDPR	AKR1B1	K222k	AKR1B1.K222k		0.75	0.5			-0.415037	-0.171537		NA		-0.346609	0.129308	0.835172	0.00414792	0.0216159	0.12516	0.845656	0.289485	2.62423	-0.0727091	-0.342397	0.358201	3.85064	0.139759	1.71602	0.14795	0.910257	-0.0600708	-0.273252	-0.0137482	-0.0522506	0.093464	0.834835
P15121.NLVVIPkSVTPER	AKR1B1	K263k	AKR1B1.K263k		1	1.5			0.485427	0.740669		NA		-0.740669	0.233739	0.232028	-0.659888	-0.567743	0.893628	1.2938	-0.104668	-0.376142	0.15697	0.730779	0.0451781	0.136214	-0.0953495	-0.703458	0.316789	3.12686	0.240895	1.9492	0.290071	2.67516	0.0340991	0.223558
P15121.LLLnNGAkmPILGLGTWK	AKR1B1	K12k	AKR1B1.K12k		5	3.5	0.75	1	-0.485427	-0.541	0.321928	0.195439	0.321928	-1.1361							-0.0285783	-0.114037	0.0798521	0.385779	0.0298749	0.119815	-0.0418396	-0.31109	-0.293701	-2.73407	-0.0363706	-0.151192	-0.190766	-1.33817	-0.115619	-1.14536
P15121.GAcQkTLSDLK	AKR1B1	K95k	AKR1B1.K95k		5.25	2.25	2	2.75	-1.1375	-3.83404	0.415037	0.423011	0.415037	-4.38343							0.161785	0.524275	-0.308744	-1.34544	0.0775032	0.228103	0.192116	1.29435	-0.341124	-1.99405	-0.0975378	-0.380259	-0.136642	-0.49349	-0.0780355	-0.466312
P15121.VcALLScTSHkDYPFHEEF	AKR1B1	K308k	AKR1B1.K308k		2.5	1.5	0.25	0.25	-0.652077	-0.405567				-0.471505							0.0617645	0.279494	-0.104524	-0.550245	0.0110457	0.0411173	0.064165	0.541506	0.010691	0.0401316	0.0105257	0.0394843	0.0404648	0.170897	7.4301e-05	0.000398434
O60218.EIAAkHK	AKR1B10	K240k	AKR1B10.K240k		0.5		0.5	0.75	-1.58496	-0.740669	0.415037	0.26967	0.415037	-1.23906	0.165106	1.27439	0.209018	1.80635	-0.0439121	-0.689374	-0.0520826	-0.227366	0.205008	1.47748	0.110219	0.591528	-0.0992026	-1.00547	0.200017	1.4417	0.171162	1.13196	0.245478	2.01136	0.0129649	0.0751826
O60218.KAFEkTLK	AKR1B10	K95k	AKR1B10.K95k		0.5		0.5		-1.58496	-0.740669	-1.58496	-0.740669	-1.58496		0.0267772	0.457385	0.0784052	0.648217	-0.0516281	-0.511769	-0.178833	-1.19347	-0.230317	-1.78292	-0.403725	-4.83187	0.0198657	0.129314	-0.174953	-1.17046	-0.0723521	-0.344323	-0.210959	-1.56944	-0.0460987	-0.323046
O60218.IkEIAAK	AKR1B10	K235k	AKR1B10.K235k		4.75	2.75	3.5	2.5	-0.736966	-1.77734	-0.447459	-1.30255	-0.447459	-0.871185	0.0341695	0.19231	0.159001	0.633864	-0.124832	-0.483806	0.363788	3.96337	0.169208	1.09687	0.519945	8.09264	0.0750817	0.672153	0.227906	1.77888	0.0242618	0.0961735	0.28265	2.55707	0.0914974	0.809562
O60218.mPIVGLGTWkSPLGK	AKR1B10	K22k	AKR1B10.K22k		5.25	4.5	4.5	4.75	-0.211504	-0.39236	0.0740006	0.136451	0.0740006	-0.871185	0.0310763	0.185933	0.0687125	0.283566	-0.0376362	-0.133075	-0.226877	-1.73957	-0.0950207	-0.484165	-0.415786	-5.11691	-0.0508788	-0.398602	0.0120968	0.0456681	0.0803402	0.393522	0.0259665	0.103629	-0.0306618	-0.197143
O60218.SGDDLFPKDDKGNAIGGk	AKR1B10	K135k	AKR1B10.K135k		12	11.5	13	7.5	-0.060121	-0.10487	-0.773724	-2.20253	-0.773724	1.66897	0.148601	0.594519	0.0464144	0.253395	0.102187	0.371768	0.0151223	0.05722	-0.00522539	-0.018999	0.00869107	0.0320466	0.00785148	0.0473529	-0.139382	-0.834364	-0.235493	-1.87732	-0.165689	-1.07753	0.0431828	0.297813
O60218.AkMPIVGLGTWK	AKR1B10	K12k	AKR1B10.K12k		3	2	1.75	2	-0.530515	-0.556965	0.169925	0.124592	0.169925	-0.654017	0.216956	1.44919	0.156544	1.03341	0.0604117	0.546388	0.0850922	0.418795	0.350142	3.69164	0.337948	3.45902	-0.102274	-1.0525	-0.0796866	-0.389407	0.309587	3.00093	0.183361	1.25819	-0.174901	-2.22911
O60218.kTAAQVLIR	AKR1B10	K243k	AKR1B10.K243k		1.75	1.5	2	0.75	-0.192645	-0.26967	-1.16993	-1.32006	-1.16993	1.39347	0.0703553	0.836768	0.0272855	0.224511	0.0430698	0.66272	-0.240159	-1.91022	0.141735	0.843425	-0.257164	-2.14179	-0.14736	-1.87177	-0.337308	-3.50313	-0.0586563	-0.265416	-0.287026	-2.62631	-0.125198	-1.29479
O60218.LLNkPGLK	AKR1B10	K173k	AKR1B10.K173k		3.75	4.5	5.25	2.5	0.247928	0.623013	-1	-2.33925	-1	3.85911	0.0703553	0.836768	0.0272855	0.224511	0.0430698	0.66272	-0.240159	-1.91022	0.141735	0.843425	-0.257164	-2.14179	-0.14736	-1.87177	-0.337308	-3.50313	-0.0586563	-0.265416	-0.287026	-2.62631	-0.125198	-1.29479
O60218.YkPVTNQVEcHPYLTQEK	AKR1B10	K179k	AKR1B10.K179k		2.25	2.5	3.5	2	0.137504	0.170176	-0.736966	-1.85865	-0.736966	1.40361	0.183496	1.29045	0.0392607	0.182336	0.144235	0.792035	0.228375	1.75838	0.154995	0.961701	0.36965	4.08389	0.0283147	0.194177	-0.220658	-1.68756	0.167232	1.09274	-0.0590135	-0.267388	-0.174279	-2.21568
O60218.EAVkVAIDAGYR	AKR1B10	K33k	AKR1B10.K33k		1.75	2	2.5	1.75	0.169925	0.407821	-0.459432	-1.00815	-0.459432	1.55271							-0.0016675	-0.0059756	-0.17931	-1.19836	-0.139484	-0.824083	0.0685462	0.592476	-0.225598	-1.74951	-0.0850101	-0.423392	-0.323142	-3.24057	-0.0631661	-0.484842
O60218.GITVTAYSPLGSPDRPWAkPEDPSLLEDPK	AKR1B10	K222k	AKR1B10.K222k		1.5	1.5	0.75	1.5			0.807355	0.623013	0.807355	-0.936141							0.104231	0.548155	-0.193252	-1.346	-0.028782	-0.114941	0.114788	1.25534	-0.179388	-1.1139	-0.129684	-0.733745	-0.261851	-2.10815	-0.0170571	-0.0962364
NA	AKR1C1	K207k	NA		NA	NA	NA	NA	NA	NA	NA	NA	NA		-0.166422	-0.550044	-0.0260695	-0.220539	-0.140352	-1.02438	0.0505941	0.219639	0.312914	3.01042	0.308228	2.93063	-0.10122	-1.03625	0.141389	0.851858	0.0353362	0.146302	0.235092	1.87203	0.0476495	0.336748
NA	AKR1C1	K209k	NA		NA	NA	NA	NA	NA	NA	NA	NA	NA		-0.166422	-0.550044	-0.0260695	-0.220539	-0.140352	-1.02438	0.0505941	0.219639	0.312914	3.01042	0.308228	2.93063	-0.10122	-1.03625	0.141389	0.851858	0.0353362	0.146302	0.235092	1.87203	0.0476495	0.336748
Q04828.ckDAGLAKSIGVSNFNR	AKR1C1	K155k	AKR1C1.K155k		0.25	0.75	0.25		1	0.683964	-1	-0.407821	-1	1.23906	-0.0447811	-0.624099	-0.00690859	-0.0299827	-0.0378725	-0.327753	-0.127437	-0.724139	-0.212649	-1.56643	-0.315727	-3.05894	0.0328804	0.231809	-0.0991993	-0.519265	-0.0749278	-0.359928	-0.181269	-1.23605	-0.0109052	-0.0624635
Q04828.DAGLAkSIGVSNFNR	AKR1C1	K161k	AKR1C1.K161k		25.75	20.25	23.75	20	-0.342888	-3.56173	-0.245112	-1.39423	-0.245112	-0.630649	-0.0853128	-0.225237	-0.0186355	-0.0458418	-0.0666773	-0.275379	0.209912	1.53425	0.28178	2.50404	0.514807	7.92149	-0.0277313	-0.1895	0.37696	4.30771	0.00828264	0.0307877	0.305915	2.93792	0.165647	2.03395
NA	AKR1C1	K68k	NA		NA	NA	NA	NA	NA	NA	NA	NA	NA		-0.224674	-0.443533	-0.180204	-0.328384	-0.0444703	-0.079645	-0.00519812	-0.0188978	0.10592	0.560246	0.134334	0.780621	-0.0428766	-0.320741	0.141354	0.851548	0.119634	0.671256	0.308178	2.97666	0.00975872	0.0555127
NA	AKR1C1	K75k	NA		NA	NA	NA	NA	NA	NA	NA	NA	NA		-0.167546	-1.67142	-0.172429	-1.47165	0.00488285	0.0213854	0.0843205	0.413869	0.161299	1.02056	0.277419	2.43747	-0.0297032	-0.205427	0.2606	2.22432	0.23982	1.93477	0.231841	1.82957	0.00933637	0.0529752
NA	AKR1C1	K84k	NA		NA	NA	NA	NA	NA	NA	NA	NA	NA		-0.167546	-1.67142	-0.172429	-1.47165	0.00488285	0.0213854	0.0843205	0.413869	0.161299	1.02056	0.277419	2.43747	-0.0297032	-0.205427	0.2606	2.22432	0.23982	1.93477	0.231841	1.82957	0.00933637	0.0529752
NA	AKR1C1	K104k	NA		NA	NA	NA	NA	NA	NA	NA	NA	NA		-0.167546	-1.67142	-0.172429	-1.47165	0.00488285	0.0213854	0.0843205	0.413869	0.161299	1.02056	0.277419	2.43747	-0.0297032	-0.205427	0.2606	2.22432	0.23982	1.93477	0.231841	1.82957	0.00933637	0.0529752
NA	AKR1C1	K201k	NA		NA	NA	NA	NA	NA	NA	NA	NA	NA		-0.0764776	-0.328996	-0.0783006	-0.366566	0.00182303	0.0330645	0.0334385	0.135976	0.309958	2.95994	0.273791	2.38288	-0.106699	-1.12217	0.0948558	0.48909	0.163506	1.05619	0.200984	1.45275	-0.0308445	-0.198524
Q04828.QLEMILNkPGLK	AKR1C1	K179k	AKR1C1.K179k		8.25	9	10.25	8	0.121991	0.178186	-0.347923	-1.42729	-0.347923	0.871949	0.18864	1.74584	0.162064	1.58503	0.0265761	0.111533	0.082948	0.405162	0.392196	4.56953	0.467684	6.47653	-0.119328	-1.33346	0.128293	0.740774	0.196343	1.4001	0.205371	1.50348	-0.0305751	-0.196488
NA	AKR1C1	K246k	NA		NA	NA	NA	NA	NA	NA	NA	NA	NA		-0.0921339	-0.257205	-0.138306	-0.896177	0.0461721	0.359438	0.0518813	0.226316	0.201841	1.44142	0.265554	2.2616	-0.0578644	-0.471578	0.103428	0.549348	0.0334727	0.137584	0.193104	1.36394	0.0314308	0.202973
NA	AKR1C1	K4k	NA		NA	NA	NA	NA	NA	NA	NA	NA	NA		-0.00386112	-0.0189583	-0.162815	-1.71664	0.158954	1.1716	0.0170219	0.0648978	0.122504	0.684929	0.221693	1.67534	-0.040702	-0.300617	0.054157	0.240963	0.084352	0.419132	0.232139	1.83343	-0.0135666	-0.0789549
NA	AKR1C1	K9k	NA		NA	NA	NA	NA	NA	NA	NA	NA	NA		-0.00386112	-0.0189583	-0.162815	-1.71664	0.158954	1.1716	0.0170219	0.0648978	0.122504	0.684929	0.221693	1.67534	-0.040702	-0.300617	0.054157	0.240963	0.084352	0.419132	0.232139	1.83343	-0.0135666	-0.0789549
NA	AKR1C1	K31k	NA		NA	NA	NA	NA	NA	NA	NA	NA	NA		-0.00386112	-0.0189583	-0.162815	-1.71664	0.158954	1.1716	0.0170219	0.0648978	0.122504	0.684929	0.221693	1.67534	-0.040702	-0.300617	0.054157	0.240963	0.084352	0.419132	0.232139	1.83343	-0.0135666	-0.0789549
NA	AKR1C1	K294k	NA		NA	NA	NA	NA	NA	NA	NA	NA	NA		-0.00579118	-0.0557034	-0.129959	-1.30099	0.124168	1.18536	0.0567083	0.251864	0.291552	2.65703	0.336895	3.43938	-0.0906181	-0.879596	0.195302	1.38842	0.134644	0.793744	0.299655	2.83235	0.0272536	0.171845
NA	AKR1C1	K123kK131k	NA		NA	NA	NA	NA	NA	NA	NA	NA	NA		-0.00579118	-0.0557034	-0.129959	-1.30099	0.124168	1.18536	0.0567083	0.251864	0.291552	2.65703	0.336895	3.43938	-0.0906181	-0.879596	0.195302	1.38842	0.134644	0.793744	0.299655	2.83235	0.0272536	0.171845
NA	AKR1C1	K201kK207k	NA		NA	NA	NA	NA	NA	NA	NA	NA	NA		-0.00579118	-0.0557034	-0.129959	-1.30099	0.124168	1.18536	0.0567083	0.251864	0.291552	2.65703	0.336895	3.43938	-0.0906181	-0.879596	0.195302	1.38842	0.134644	0.793744	0.299655	2.83235	0.0272536	0.171845
NA	AKR1C1	K270k	NA		NA	NA	NA	NA	NA	NA	NA	NA	NA		0.0475168	0.458351	-0.258283	-1.5868	0.3058	1.83996	-0.00700901	-0.0256691	0.255036	2.11199	0.280821	2.48931	-0.101114	-1.03462	0.042788	0.182331	0.235451	1.87676	0.204733	1.49604	-0.0865635	-0.747755
Q04828.SkALEATK	AKR1C1	K33k	AKR1C1.K33k		8	7.75	8.25	5.75	-0.0443941	-0.121058	-0.5025	-0.894593	-0.5025	0.874181							0.0802591	0.388307	0.0205148	0.079307	0.0867051	0.429163	0.0230533	0.153067	-0.153769	-0.963604	-0.000587546	-0.00211606	0.00426866	0.0156086	-0.0688246	-0.543959
Q04828.ALEATkLAIEAGFR	AKR1C1	K39k	AKR1C1.K39k		4.75	3.5	2.5	2	-0.415037	-0.424619	-0.289507	-0.740669	-0.289507	-0.482387							-0.0616149	-0.245121	-0.228013	-1.72648	-0.197814	-1.19522	0.0759666	0.625786	-0.223308	-1.35078	-0.172948	-0.905479	-0.251239	-1.80807	-0.0256757	-0.128437
NA	AKR1C1	K123k	NA		NA	NA	NA	NA	NA	NA	NA	NA	NA								-0.209537	-1.52987	-0.166875	-1.07408	-0.357073	-3.82813	-0.0164619	-0.104892	-0.0234912	-0.0928343	-0.0928845	-0.475637	-0.122265	-0.692051	0.0311785	0.201055
NA	AKR1C1	K131k	NA		NA	NA	NA	NA	NA	NA	NA	NA	NA								-0.209537	-1.52987	-0.166875	-1.07408	-0.357073	-3.82813	-0.0164619	-0.104892	-0.0234912	-0.0928343	-0.0928845	-0.475637	-0.122265	-0.692051	0.0311785	0.201055
NA	AKR1C1	K136k	NA		NA	NA	NA	NA	NA	NA	NA	NA	NA								-0.209537	-1.52987	-0.166875	-1.07408	-0.357073	-3.82813	-0.0164619	-0.104892	-0.0234912	-0.0928343	-0.0928845	-0.475637	-0.122265	-0.692051	0.0311785	0.201055
NA	AKR1C1	K153k	NA		NA	NA	NA	NA	NA	NA	NA	NA	NA								-0.209537	-1.52987	-0.166875	-1.07408	-0.357073	-3.82813	-0.0164619	-0.104892	-0.0234912	-0.0928343	-0.0928845	-0.475637	-0.122265	-0.692051	0.0311785	0.201055
NA	AKR1C1	K155k	NA		NA	NA	NA	NA	NA	NA	NA	NA	NA								-0.209537	-1.52987	-0.166875	-1.07408	-0.357073	-3.82813	-0.0164619	-0.104892	-0.0234912	-0.0928343	-0.0928845	-0.475637	-0.122265	-0.692051	0.0311785	0.201055
NA	AKR1C1	K183k	NA		NA	NA	NA	NA	NA	NA	NA	NA	NA								-0.209537	-1.52987	-0.166875	-1.07408	-0.357073	-3.82813	-0.0164619	-0.104892	-0.0234912	-0.0928343	-0.0928845	-0.475637	-0.122265	-0.692051	0.0311785	0.201055
NA	AKR1C1	K185k	NA		NA	NA	NA	NA	NA	NA	NA	NA	NA								-0.209537	-1.52987	-0.166875	-1.07408	-0.357073	-3.82813	-0.0164619	-0.104892	-0.0234912	-0.0928343	-0.0928845	-0.475637	-0.122265	-0.692051	0.0311785	0.201055
P52895.SLkNLQLDYVDLYLIHFPVSVKPGEEVIPK	AKR1C2	K104k	AKR1C2.K104k		1.75	2	0.5		0.169925	0.0427072	-1.58496	-0.407821	-1.58496	0.29438	0.00110994	0.00793845	0.0252717	0.358052	-0.0241618	-0.193305	-0.0370204	-0.152636	-0.0854111	-0.420837	-0.205593	-1.4842	0.0186723	0.120642	-0.201165	-1.45483	-0.0819308	-0.403603	-0.112042	-0.612835	-0.0535722	-0.390892
P52895.LNDGHFmPVLGFGTYAPAEVPKSk	AKR1C2	K33k	AKR1C2.K33k		40.75	44.5	24	24.75	0.126264	0.204233	0.0439433	0.0771124	0.0439433	0.204108	0.00690168	0.0884026	0.0238798	0.252627	-0.0169781	-0.167245	-0.125057	-0.705097	0.0648817	0.296975	-0.080178	-0.387803	-0.0732908	-0.649881	0.0388509	0.163062	-0.122563	-0.694424	-0.101152	-0.533069	0.0725232	0.584118
P52895.SkDIVLVAYSALGSHR	AKR1C2	K209k	AKR1C2.K209k		8	8.25	7.75	8.25	0.0430687	0.10742	0.0874628	0.216051	0.0874628	-0.177285	0.0310763	0.185933	0.0687125	0.283566	-0.0376362	-0.133075	-0.226877	-1.73957	-0.0950207	-0.484165	-0.415786	-5.11691	-0.0508788	-0.398602	0.0120968	0.0456681	0.0803402	0.393522	0.0259665	0.103629	-0.0306618	-0.197143
P52895.DAGLAkSIGVSNFNHR	AKR1C2	K161k	AKR1C2.K161k		54.75	56.5	59.75	53.5	0.0451888	0.134722	-0.158698	-0.865301	-0.158698	0.73563	-0.0185519	-0.092046	-0.0160906	-0.108735	-0.00246127	-0.00461057	0.183219	1.23887	0.15244	0.938321	0.431978	5.51728	0.0118769	0.0735069	0.261695	2.24023	-0.0045616	-0.0166998	0.217768	1.65187	0.119629	1.20678
P52895.IADGSVkREDIFYTSK	AKR1C2	K75k	AKR1C2.K75k		6.25	8	8.75	6.5	0.343954	0.334027	-0.415037	-1.75686	-0.415037	1.4049	0.0168056	0.0966131	0.00845567	0.0460008	0.00834992	0.0399137	-0.0149029	-0.0563402	-0.0988947	-0.510684	-0.0937911	-0.475867	0.0324096	0.227844	-0.127361	-0.73314	-0.0746106	-0.357993	-0.0938317	-0.482082	-0.0237006	-0.146406
P52895.NLQLDYVDLYLIHFPVSVkPGEEVIPK	AKR1C2	K123k	AKR1C2.K123k		1.5	0.75	0.5		-0.807355	-0.320751	-1.58496	-0.407821	-1.58496	0.118718	-0.0589149	-0.632529	-0.0828669	-1.6684	0.0239521	0.187742	-0.00361666	-0.013064	0.0260193	0.102791	-0.0425372	-0.179123	-0.0114355	-0.0705756	-0.173754	-1.15822	0.154797	0.973178	0.0410696	0.173856	-0.147618	-1.68222
P52895.DSkYQcVK	AKR1C2	K4k	AKR1C2.K4k		3.75	4.25	2.75	3.25	0.169925	0.396592	0.222392	0.683964	0.222392		0.210694	1.56811	0.180652	0.713549	0.0300421	0.248709	-0.163872	-1.04509	-0.213534	-1.57692	-0.328836	-3.29131	0.019163	0.124193	-0.175468	-1.17574	-0.120645	-0.679213	-0.190946	-1.34014	-0.0246321	-0.152984
P52895.GVVVLAkSYNEQR	AKR1C2	K270k	AKR1C2.K270k		9.25	13.5	12.25	9.75	0.533432	2.62455	-0.321928	-1.0432	-0.321928	3.14349	0.10841	0.406781	0.0192248	0.0587146	0.089185	0.302399	-0.137445	-0.47962	0.0614247	0.201432	-0.0645591	-0.206708	-0.0873373	-0.476289	0.128749	0.548574	0.0976962	0.360962	0.371377	2.73806	0.0201484	0.0884307
P52895.LLDFckSK	AKR1C2	K207k	AKR1C2.K207k		8.25	7.25	7.5	4	-0.180572	-0.517127	-0.866733	-1.58447	-0.866733	1.26647	0.0285177	0.33536	-0.0644788	-0.241067	0.0929966	0.431533	-0.19387	-1.35276	-0.0908051	-0.455955	-0.327906	-3.27448	-0.0397694	-0.292121	-0.156082	-0.985224	-0.233533	-1.8516	-0.350741	-3.76397	0.0347984	0.229043
P52895.ckDAGLAK	AKR1C2	K155k	AKR1C2.K155k		4.75	5.25	4.75	2.5	0.137504	0.159117	-0.862496	-1.46841	-0.862496	1.34462	0.0285177	0.33536	-0.0644788	-0.241067	0.0929966	0.431533	-0.19387	-1.35276	-0.0908051	-0.455955	-0.327906	-3.27448	-0.0397694	-0.292121	-0.156082	-0.985224	-0.233533	-1.8516	-0.350741	-3.76397	0.0347984	0.229043
P52895.SkIADGSVKR	AKR1C2	K68k	AKR1C2.K68k		0.5	0.25	1.5	0.25	-0.584963	-0.170176	-1.80735	-1.75778	-1.80735	1.52259	0.281622	0.615009	0.14365	0.498764	0.137972	0.446209	0.0864987	0.42783	0.218438	1.63569	0.148698	0.904598	-0.0509109	-0.398927	-0.0607056	-0.276792	-0.00783269	-0.0290617	-0.207819	-1.53218	-0.0237558	-0.146794
P52895.LLEMILNkPGLKYKPVcNQVEcHPYFNQR	AKR1C2	K179k	AKR1C2.K179k		1	3.25	0.25		1.48543	0.644448	-1	-0.407821	-1	0.744499	0.126971	0.546019	0.0236203	0.0781703	0.10335	0.449701	0.197365	1.39127	-0.134268	-0.780073	0.0905575	0.454319	0.127966	1.48892	0.0175807	0.0678557	-0.0733628	-0.350417	-0.00876933	-0.0326615	0.040861	0.278211
P52895.ILFDTVDLcATWEAMEKck	AKR1C2	K155k	AKR1C2.K155k		0.75	0.25	0.25		-1	-0.396592	-1	-0.407821	-1	-0.407821	0.0243364	0.0923376	-0.0713747	-0.469871	0.0957111	0.505885	0.231705	1.00334	0.348578	1.86826	0.340774	2.45157	-0.0485437	-0.206292	0.271554	1.66334	0.122538	0.529361	0.140978	0.634151	0.0644653	0.369977
P52895.kLLDFcK	AKR1C2	K201k	AKR1C2.K201k		4.75	5.25	4.25	1.75	0.137504	0.183484	-1.16993	-1.99244	-1.16993	1.98868	0.0703553	0.836768	0.0272855	0.224511	0.0430698	0.66272	-0.240159	-1.91022	0.141735	0.843425	-0.257164	-2.14179	-0.14736	-1.87177	-0.337308	-3.50313	-0.0586563	-0.265416	-0.287026	-2.62631	-0.125198	-1.29479
P52895.YQcVkLNDGHFMPVLGFGTYAPAEVPKSk	AKR1C2	K9k	AKR1C2.K9k		0.5	0.5	0.25				-1	-0.407821	-1	-0.18612	0.090176	0.277226	-0.131887	-0.591456	0.222063	0.805966	-0.0725511	-0.341458	0.108856	0.581531	0.0901888	0.451888	-0.0699989	-0.609806	-0.0179843	-0.0695259	-0.0230767	-0.091046	-0.216115	-1.63165	0.00228802	0.0124376
P52895.IADGSVkR	AKR1C2	K75k	AKR1C2.K75k		5.25	1.5	2.5	1.5	-1.65208	-1.84265	-0.652077	-0.419468	-0.652077	-1.78305	-0.119896	-1.83393	-0.186765	-1.94005	0.0668692	1.03501	0.0741626	0.351073	-0.0243837	-0.0957134	0.132636	0.766533	0.0380256	0.276448	-0.109722	-0.595445	0.272754	2.40441	-0.0398894	-0.168093	-0.171847	-2.16358
P52895.EEPWVDPNSPVLLEDPVLcALAKk	AKR1C2	K247k	AKR1C2.K247k		13	12.75	11.75	15	-0.0274807	-0.0589072	0.345775	0.677612	0.345775	-1.59751	0.106682	0.626638	-0.186874	-0.825849	0.293557	1.30094	-0.0446532	-0.189552	0.0899045	0.450016	-0.070823	-0.331251	-0.0519212	-0.409193	-0.227725	-1.75357	-0.130022	-0.737506	-0.170185	-1.07399	-0.0442194	-0.30618
P52895.SkALEAVK	AKR1C2	K33k	AKR1C2.K33k		7.5	8	8.75	6.5	0.0901978	0.17257	-0.415037	-1.01342	-0.415037	1.08104	0.110121	0.677482	-0.0612595	-0.374826	0.171381	1.36219	0.240835	1.91914	0.0306968	0.123506	0.303064	2.84419	0.0810852	0.749261	0.351476	3.77857	-0.00397051	-0.0145006	0.230985	1.81847	0.159702	1.91388
P52895.YkPVcNQVEcHPYFNQR	AKR1C2	K185k	AKR1C2.K185k		30.5	35	33.5	26.5	0.197037	0.523244	-0.335349	-1.26392	-0.335349	1.54723	0.313004	0.90478	-0.00754326	-0.0264985	0.320547	1.39623	0.0033711	0.0121649	0.279222	2.46487	0.265824	2.26552	-0.106442	-1.11805	0.0897958	0.454861	0.133224	0.781751	0.00844556	0.0314141	-0.0195122	-0.117622
P52895.ckDAGLAKSIGVSNFNHR	AKR1C2	K155k	AKR1C2.K155k		3.75	3.5	4.5	1.75	-0.0931094	-0.0984761	-1.24793	-1.6477	-1.24793	1.20572							0.144077	0.863767	-0.131155	-0.754343	0.0801272	0.387487	0.106202	1.11423	-0.195438	-1.38994	0.0571661	0.257238	0.0500121	0.219067	-0.113495	-1.11349
P52895.QNVQVFEFQLTSEEMkAIDGLNR	AKR1C2	K294k	AKR1C2.K294k		6.25	4.5	5.5	3	-0.452512	-0.998821	-0.823122	-1.14491	-0.823122	0.275757							0.0458031	0.195282	-0.0881205	-0.438341	-0.06958	-0.323975	0.0516766	0.406698	-0.0208473	-0.081523	-0.0390993	-0.164262	0.00561952	0.0206623	0.00820062	0.0462129
P52895.LLEmILNkPGLK	AKR1C2	K179k	AKR1C2.K179k		8.75	7.75	8	6	-0.169925	-0.388655	-0.400538	-0.660032	-0.400538	0.320511							0.412344	2.34099	-0.227934	-0.562622	0.288292	1.47167	0.27481	2.04764	0.192637	0.530244	0.00554119	0.014149	-0.155229	-0.477503	0.055607	0.232229
P52895.SkIADGSVK	AKR1C2	K68k	AKR1C2.K68k		9.75	9	9.25	7	-0.112475	-0.172691	-0.389947	-1.5371	-0.389947	0.892656							-0.0740448	-0.350368	-0.069744	-0.324932	-0.169128	-1.09609	-0.00165955	-0.00961321	-0.151369	-0.941425	0.1036	0.550591	-0.10967	-0.595053	-0.114558	-1.12939
P52895.KLLDFckSK	AKR1C2	K207k	AKR1C2.K207k		8.75	10.75	12.5	9.5	0.289507	1.13387	-0.387023	-1.77754	-0.387023	2.60547							0.156325	0.914864	0.0203026	0.0775055	0.252433	2.03901	0.0496401	0.376578	0.152633	0.95307	-0.167229	-1.09271	0.129766	0.752906	0.143714	1.61085
P52895.REDIFYTSkLWSNSHRPELVR	AKR1C2	K84k	AKR1C2.K84k		2.25	4.75	1.75	2.75	1	0.356342	0.584963	0.132055	0.584963	0.166414							-0.288013	-2.60102	-0.199608	-1.41628	-0.516868	-7.98982	-0.0341126	-0.242283	-0.26469	-2.28403	-0.00685975	-0.0253508	-0.229124	-1.79449	-0.115843	-1.14875
P52895.YqcVkLNDGHFMPVLGFGTYAPAEVPK	AKR1C2	K9k	AKR1C2.K9k		6.5	6	2.75	4.75	-0.111031	-0.091825	0.736966	0.580025	0.736966	-0.629517							-0.122402	-0.68413	0.0694331	0.323119	-0.162199	-1.02912	-0.0740228	-0.658942	-0.043144	-0.184099	-0.0884455	-0.445893	-0.0897956	-0.45486	0.020354	0.123303
P52895.EDIFYTSkLWSNSHRPELVR	AKR1C2	K84k	AKR1C2.K84k		7.75	3.75	2.75	5.25	-1	-0.744875	0.874469	0.536784	0.874469	-1.5449							0.0574791	0.256019	0.0146358	0.0552715	0.191623	1.3283	0.0165318	0.105384	-0.0346988	-0.143307	-0.0937014	-0.481194	-0.078316	-0.38083	0.0265099	0.166442
P52895.LLEMILNKPGLKYk	AKR1C2	K185k	AKR1C2.K185k		5.75	3.5	0.75	4.75	-0.678072	-1.32978	2.32193	2.98069	2.32193	-3.4541							-0.0556366	-0.246123	-0.100499	-0.521836	-0.275698	-2.41149	0.017311	0.110894	0.0152285	0.0582234	-0.0514569	-0.226631	0.128566	0.743013	0.0299618	0.191874
NA	AKR1C3	K84k	NA		NA	NA	NA	NA	NA	NA	NA	NA	NA		-0.324871	-1.38704	-0.0369989	-0.120875	-0.287872	-1.5013	-0.0331814	-0.134796	0.271681	2.35147	0.232832	1.81499	-0.117636	-1.30406	0.141047	0.848869	0.172233	1.14277	0.246905	2.03095	-0.0140117	-0.0817618
P42330.SkLLDFcK	AKR1C3	K201k	AKR1C3.K201k		4.75	5.25	5.5	5.25	0.137504	0.396592	-0.0641303	-0.26967	-0.0641303	-1.10712	0.0262359	0.172851	0.0284021	0.161724	-0.00216614	-0.00855481	0.0939616	0.477014	0.181108	1.21691	0.223308	1.6952	-0.0336269	-0.238138	-0.135778	-0.803375	-0.051165	-0.225097	-0.147085	-0.902447	-0.0380165	-0.254781
P42330.YkPVcNQVEcHPYFNR	AKR1C3	K185k	AKR1C3.K185k		5.5	5.25	5.5	5.25	-0.0641303	-0.115329	-0.0641303	-0.170176	-0.0641303		-0.0782924	-0.527223	-0.0946864	-0.669437	0.016394	0.151782	0.165168	1.05755	-0.120113	-0.666277	0.0524885	0.229486	0.11008	1.1769	0.0712136	0.337503	-0.00789245	-0.0292906	-0.0693566	-0.326481	0.0355424	0.234922
P42330.WVDPNSPVLLEDPVLcALAKk	AKR1C3	K247k	AKR1C3.K247k		2.25	2	2	1.5	-0.152003	-0.407821	-0.36257	-0.443709	-0.36257	-0.346609	0.0455259	0.0942684	-0.0262375	-0.0596211	0.0717633	0.154176	0.224027	1.70409	0.0879308	0.437106	0.337614	3.45279	0.0525148	0.415269	-0.139184	-0.832644	0.128051	0.738791	-0.0541362	-0.240852	-0.120069	-1.21361
NA	AKR1C3	K4k	NA		NA	NA	NA	NA	NA	NA	NA	NA	NA		-0.00981282	-0.0477159	-0.114498	-0.698857	0.104685	0.606915	0.0822323	0.40065	0.226078	1.72958	0.316783	3.07728	-0.055505	-0.446401	0.0745612	0.357692	0.18372	1.26201	0.233286	1.84838	-0.0490452	-0.349247
NA	AKR1C3	K104k	NA		NA	NA	NA	NA	NA	NA	NA	NA	NA		0.193867	0.713243	-0.17897	-0.643469	0.372837	1.32559	0.0676598	0.312845	0.0984692	0.507743	0.215247	1.59731	-0.0118883	-0.0735828	0.0961551	0.498039	0.15904	1.01321	0.254436	2.13605	-0.0282541	-0.17918
P42330.SkALEVTK	AKR1C3	K33k	AKR1C3.K33k		3.25	2.75	3.5	3.25	-0.222392	-0.201834	-0.0995357	-0.112513	-0.0995357	-0.093013	0.373853	0.707505	-0.00318029	-0.00810202	0.377033	1.49098	0.218812	1.64022	-0.27496	-2.4004	0.0414952	0.174043	0.19053	2.90526	0.276415	2.40519	-0.0906018	-0.457726	0.0359233	0.147156	0.165179	1.98506
P42330.ALEVTkLAIEAGFR	AKR1C3	K39k	AKR1C3.K39k		0.5	0.5						NA			0.301777	0.914144	-1.03039	-0.528998	1.33216	3.44016	0.0538799	0.236797	0.146878	0.888407	0.267107	2.28419	-0.0358846	-0.257583	-0.109674	-0.59509	0.139446	0.834916	-0.149408	-0.923484	-0.11193	-1.0903
O43488.ANPWDGkSLKPDSVR	AKR7A2	K112k	AKR7A2.K112k		2	2	2.75	1.25			-1	-1.36094	-1	1.25575	-0.0447811	-0.624099	-0.00690859	-0.0299827	-0.0378725	-0.327753	-0.127437	-0.724139	-0.212649	-1.56643	-0.315727	-3.05894	0.0328804	0.231809	-0.0991993	-0.519265	-0.0749278	-0.359928	-0.181269	-1.23605	-0.0109052	-0.0624635
NA	AKR7A2	K245k	NA		NA	NA	NA	NA	NA	NA	NA	NA	NA		0.193867	0.713243	-0.17897	-0.643469	0.372837	1.32559	0.0676598	0.312845	0.0984692	0.507743	0.215247	1.59731	-0.0118883	-0.0735828	0.0961551	0.498039	0.15904	1.01321	0.254436	2.13605	-0.0282541	-0.17918
O43488.SQLETSLkR	AKR7A2	K128k	AKR7A2.K128k		1.25	1.5	1.5	0.25	0.222392	0.26967	-1.80735	-1.0823	-1.80735	2.09432							0.0812466	0.394466	0.0744814	0.352987	0.151849	0.932961	0.00261046	0.0152161	-0.0440908	-0.176316	-0.0376618	-0.132487	-0.0404733	-0.152648	-0.00675136	-0.0326269
P31749.LSPPFkPQVTSETDTR	AKT1	K426k	AKT1.K426k		2.5	2.25	2.5	3.25	-0.137504	-0.171537	0.347923	0.466885	0.347923	-0.888034	0.352871	0.700713	0.457543	1.37929	-0.104672	-0.212985	0.0867274	0.429307	0.180545	1.21108	0.31039	2.96729	-0.036201	-0.260344	-0.0209706	-0.0820456	0.0576316	0.259784	0.0485905	0.211696	-0.035316	-0.233129
P31749.TLGPEAkSLLSGLLK	AKT1	K377k	AKT1.K377k		1.5	2.25	0.75	1.75	0.514573	1.00815	1	0.888034	1	-0.295831	0.0286204	0.200547	0.0527154	0.5123	-0.024095	-0.172561	-0.0559439	-0.247765	-0.139468	-0.823941	-0.232757	-1.81403	0.032229	0.226327	-0.235266	-1.87432	0.0600086	0.272906	-0.0401606	-0.169413	-0.132667	-1.41789
NA	AKT1	K297k	NA		NA	NA	NA	NA	NA	NA	NA	NA	NA		-0.0753256	-0.472568	-0.192226	-0.765811	0.1169	0.463336	-0.0117002	-0.0436685	0.204208	1.46832	0.152782	0.941434	-0.0833115	-0.778824	-0.0712211	-0.337548	0.197846	1.41703	0.126948	0.72977	-0.120892	-1.22645
NA	AKT1	K301k	NA		NA	NA	NA	NA	NA	NA	NA	NA	NA		-0.0753256	-0.472568	-0.192226	-0.765811	0.1169	0.463336	-0.0117002	-0.0436685	0.204208	1.46832	0.152782	0.941434	-0.0833115	-0.778824	-0.0712211	-0.337548	0.197846	1.41703	0.126948	0.72977	-0.120892	-1.22645
NA	AKT1	K8k	NA		NA	NA	NA	NA	NA	NA	NA	NA	NA		-0.132633	-1.01063	-0.223009	-1.82658	0.090376	0.647003	-0.0258627	-0.10211	0.225643	1.72416	0.160534	1.01333	-0.0970476	-0.973101	0.0316312	0.129082	0.145572	0.888875	0.178621	1.20833	-0.0511936	-0.368799
NA	AKT1	K14k	NA		NA	NA	NA	NA	NA	NA	NA	NA	NA		-0.132633	-1.01063	-0.223009	-1.82658	0.090376	0.647003	-0.0258627	-0.10211	0.225643	1.72416	0.160534	1.01333	-0.0970476	-0.973101	0.0316312	0.129082	0.145572	0.888875	0.178621	1.20833	-0.0511936	-0.368799
NA	AKT1	K39k	NA		NA	NA	NA	NA	NA	NA	NA	NA	NA		-0.132633	-1.01063	-0.223009	-1.82658	0.090376	0.647003	-0.0258627	-0.10211	0.225643	1.72416	0.160534	1.01333	-0.0970476	-0.973101	0.0316312	0.129082	0.145572	0.888875	0.178621	1.20833	-0.0511936	-0.368799
NA	AKT1	K276k	NA		NA	NA	NA	NA	NA	NA	NA	NA	NA		-0.132633	-1.01063	-0.223009	-1.82658	0.090376	0.647003	-0.0258627	-0.10211	0.225643	1.72416	0.160534	1.01333	-0.0970476	-0.973101	0.0316312	0.129082	0.145572	0.888875	0.178621	1.20833	-0.0511936	-0.368799
P31749.LGGGSEDAkEIMQHR	AKT1	K400k	AKT1.K400k		1.75	2	1.75	0.5	0.169925	0.121058	-1.41504	-1.75778	-1.41504	0.915475							-0.177075	-1.17552	-0.219643	-1.65031	-0.273821	-2.38334	0.0164253	0.104635	-0.155458	-0.979368	-0.101092	-0.532647	-0.168284	-1.10317	-0.0244266	-0.151527
P31751.LLPPFkPQVTSEVDTR	AKT2	K427k	AKT2.K427k		2.75	4.75	3	4.25	0.736966	2.88249	0.469485	0.828784	0.469485	-0.639402	-0.125923	-1.18176	-0.0123512	-0.0702611	-0.113572	-0.920026	0.144334	0.866015	-0.0967791	-0.49613	-0.0358726	-0.147251	0.0930372	0.914242	0.143743	0.872599	0.065819	0.305835	0.00269843	0.00980343	0.0350114	0.230722
P31751.ITDFGLckEGISDGATmK	AKT2	K298k	AKT2.K298k		0.5	1	0.5	0.75	0.736966	0.328714	0.415037	0.170176	0.415037	-0.204865	-0.061306	-0.310609	-0.109696	-0.515306	0.04839	0.169298	-0.156806	-0.978429	-0.0808528	-0.392005	-0.228828	-1.76409	-0.0293076	-0.202204	-0.130709	-0.760728	-0.17479	-1.1688	-0.192701	-1.35948	0.0198056	0.119597
P31751.AkVTMNDFDYLK	AKT2	K146k	AKT2.K146k		1	1.5	0.25	1.5	0.485427	0.407821	1.80735	1.75778	1.80735	-0.59718	0.0436561	0.460582	-0.00225162	-0.0126941	0.0459077	0.420809	0.0526246	0.230198	-0.108393	-0.578152	-0.0373246	-0.15407	0.0621313	0.518503	0.0307801	0.125191	-0.0572972	-0.257954	-0.0758033	-0.365288	0.0395732	0.267524
P31751.TLSPEAkSLLAGLLK	AKT2	K378k	AKT2.K378k		0.5	2		1.5	1.58496	1.56321	2.80735	1.85865	2.80735								-0.179498	-1.17942	0.100771	0.520568	-0.189818	-1.26414	-0.107188	-1.12244	0.0525073	0.188478	-0.0619756	-0.247202	-0.148151	-0.658358	0.0467705	0.292739
P13716.EGADMLMVkPGMPYLDIVR	ALAD	K252k	ALAD.K252k		1	0.5	0.5	1.25	-0.736966	-0.740669	1	1.00815	1	-1.75778	0.0117962	0.0481207	-0.0550466	-0.336083	0.0668428	0.440771	0.0225278	0.0877844	0.262207	2.21336	0.235093	1.84409	-0.0924842	-0.906264	0.272572	2.40165	-0.0871865	-0.437595	0.134041	0.788644	0.16164	1.95257
P13196.AkVQQTPDGSQQSPDGTQLPSGHPLPATSQGTASK	ALAS1	K74k	ALAS1.K74k		0.75	1.5	0.75	1	0.807355	1.00815	0.321928	0.195439	0.321928	-0.740669	-0.40179	-0.600611	0.11763	0.319549	-0.519421	-1.43956	0.104538	0.550349	0.167122	1.07648	0.300379	2.79986	-0.024149	-0.161432	0.168012	1.10047	0.164872	1.06952	0.121191	0.683528	0.00141074	0.00762752
P13196.TDGGDPSGLLkNFQDIMQK	ALAS1	K168k	ALAS1.K168k		1.75	1.5	0.25	0.5	-0.192645	-0.13266	0.584963	0.26967	0.584963	-0.286378	-0.181832	-1.69365	-0.0795097	-0.928909	-0.102322	-0.77294	0.0612052	0.276393	-0.269674	-2.32181	-0.127188	-0.722137	0.127675	1.48353	0.105188	0.562082	-0.301704	-2.86665	-0.00988406	-0.0369808	0.182817	2.40419
P13196.KEVAETSAGPSVVSVkTDGGDPSGLLK	ALAS1	K157k	ALAS1.K157k		0.75	1.5		1.25	0.807355	0.623013	2.58496	0.850405	2.58496	-0.293968	0.0832586	0.112048	0.177067	0.589476	-0.0938084	-0.314429	-0.135453	-0.789971	0.0844827	0.414903	-0.132071	-0.761873	-0.0848656	-0.799776	-0.197686	-1.41523	0.065203	0.302286	-0.0317517	-0.129635	-0.118116	-1.18342
P13196.kQVSVWcSNDYLGMSR	ALAS1	K243k	ALAS1.K243k		3	2.75	1.75	2.5	-0.115477	-0.151697	0.459432	0.623013	0.459432	-0.871185	-0.00717681	-0.0254017	0.0364863	0.0721283	-0.0436631	-0.0941973	0.0800461	0.386983	0.205072	1.47821	0.230914	1.7905	-0.0482432	-0.37229	0.219799	1.67692	-0.0338846	-0.139501	0.186863	1.2957	0.11398	1.12074
P13196.VPQAFLQkAGK	ALAS1	K21k	ALAS1.K21k		1.75	1.5	1.5	1.75	-0.192645	-0.26967	0.192645	0.26967	0.192645	-0.621125	0.200544	2.01518	0.128982	0.430981	0.0715622	0.217351	-0.0660101	-0.303388	0.193356	1.34714	0.0636378	0.289958	-0.100081	-1.01881	0.262664	2.25434	-0.0217822	-0.0854969	0.214026	1.60629	0.127802	1.33704
P13196.VADAAkNTEVcDELMSR	ALAS1	K539k	ALAS1.K539k		4.75	7.75	4.75	6.75	0.678072	3.83404	0.485427	1.77734	0.485427	-0.888034	-0.0716409	-0.313256	-0.13567	-0.469108	0.0640294	0.328773	0.0973997	0.500382	0.108834	0.581369	0.296828	2.74187	-0.00441211	-0.0260224	0.0335444	0.137917	0.0252516	0.10049	-0.0934654	-0.479586	0.00372599	0.0204336
P13196.kEVAETSAGPSVVSVK	ALAS1	K142k	ALAS1.K142k		1.75	2		0.25	0.169925	0.204865	1	0.407821	1		0.0940249	1.08849	0.0722827	0.838313	0.0217423	0.388971	0.193265	1.34614	0.079562	0.383981	0.294809	2.70923	0.043874	0.330117	0.0432445	0.184599	0.0757794	0.365141	-0.020975	-0.0820643	-0.014618	-0.0856078
P13196.EVAETSAGPSVVSVkTDGGDPSGLLK	ALAS1	K157k	ALAS1.K157k		2.5	2.75	1.75	2	0.125531	0.171537	0.169925	0.204865	0.169925		0.216956	1.44919	0.156544	1.03341	0.0604117	0.546388	0.0850922	0.418795	0.350142	3.69164	0.337948	3.45902	-0.102274	-1.0525	-0.0796866	-0.389407	0.309587	3.00093	0.183361	1.25819	-0.174901	-2.22911
P13196.AHIFPMADDYSDSLITKk	ALAS1	K243k	ALAS1.K243k		4.5	3.75	2	4	-0.247928	-0.410659	0.917538	1.8729	0.917538	-1.86092	0.165403	0.944276	-0.415238	-0.519409	0.580641	0.821484
P13196.VcGAVMDTLkQHGAGAGGTR	ALAS1	K271k	ALAS1.K271k		3.25	5.75	2.75	2.75	0.777608	2.13721				1.66924	0.118046	0.262826	-0.251875	-0.504519	0.369921	1.03983	-0.0444407	-0.188498	-0.1049	-0.552933	-0.237897	-1.88053	0.0233292	0.155164	-0.113044	-0.620407	-0.0393582	-0.165515	-0.00907027	-0.0338238	-0.0331069	-0.215839
P13196.VSHLLQDNLPkSVSTFQYDR	ALAS1	K192k	ALAS1.K192k		4.25	4.5	1.5	3.25	0.0780025	0.115329	1	2.40257	1	-1.30397	0.146034	1.23889	-0.0226383	-0.127459	0.168673	1.23757	0.105609	0.558017	0.375635	4.20935	0.430538	5.48083	-0.104194	-1.08245	0.363314	4.01886	0.332024	3.40372	0.469317	6.63493	0.0140586	0.0820587
P13196.EkSYFSGLSK	ALAS1	K626k	ALAS1.K626k		1.5	1	0.5	1	-0.485427	-0.407821	0.736966	0.443709	0.736966	-1.03753							-0.0207747	-0.0803944	0.029273	0.117126	-0.133778	-0.775994	-0.0193117	-0.125273	0.0102336	0.0365047	0.0611265	0.253269	-0.0540433	-0.22861	-0.0220642	-0.124949
P13196.MMEVGAkPAPR	ALAS1	K42k	ALAS1.K42k		0.75	0.75		0.25			1	0.407821	1	-0.177285
NA	ALB	K205k	NA		NA	NA	NA	NA	NA	NA	NA	NA	NA		-0.0895225	-0.528931	-0.0506767	-0.297356	-0.0388459	-0.159271	0.0898103	0.449397	0.150415	0.919997	0.288516	2.60894	-0.0233852	-0.15559	0.173448	1.1551	0.148768	0.917663	0.213148	1.59569	0.0110887	0.0635847
NA	ALB	K300k	NA		NA	NA	NA	NA	NA	NA	NA	NA	NA		-0.0588115	-0.616261	-0.0577757	-0.488464	-0.00103577	-0.0135792	0.029815	0.119547	0.207184	1.50253	0.253261	2.08732	-0.0684407	-0.591226	0.287498	2.63386	0.187251	1.29988	0.268515	2.34069	0.0450411	0.313814
NA	ALB	K305k	NA		NA	NA	NA	NA	NA	NA	NA	NA	NA		-0.0588115	-0.616261	-0.0577757	-0.488464	-0.00103577	-0.0135792	0.029815	0.119547	0.207184	1.50253	0.253261	2.08732	-0.0684407	-0.591226	0.287498	2.63386	0.187251	1.29988	0.268515	2.34069	0.0450411	0.313814
NA	ALB	K310k	NA		NA	NA	NA	NA	NA	NA	NA	NA	NA		-0.0588115	-0.616261	-0.0577757	-0.488464	-0.00103577	-0.0135792	0.029815	0.119547	0.207184	1.50253	0.253261	2.08732	-0.0684407	-0.591226	0.287498	2.63386	0.187251	1.29988	0.268515	2.34069	0.0450411	0.313814
NA	ALB	K337k	NA		NA	NA	NA	NA	NA	NA	NA	NA	NA		-0.0588115	-0.616261	-0.0577757	-0.488464	-0.00103577	-0.0135792	0.029815	0.119547	0.207184	1.50253	0.253261	2.08732	-0.0684407	-0.591226	0.287498	2.63386	0.187251	1.29988	0.268515	2.34069	0.0450411	0.313814
NA	ALB	K341k	NA		NA	NA	NA	NA	NA	NA	NA	NA	NA		-0.0588115	-0.616261	-0.0577757	-0.488464	-0.00103577	-0.0135792	0.029815	0.119547	0.207184	1.50253	0.253261	2.08732	-0.0684407	-0.591226	0.287498	2.63386	0.187251	1.29988	0.268515	2.34069	0.0450411	0.313814
NA	ALB	K257k	NA		NA	NA	NA	NA	NA	NA	NA	NA	NA		-0.0526506	-0.573394	-0.150414	-0.576036	0.0977631	0.356433	-0.0255212	-0.100627	0.205547	1.48366	0.17325	1.13693	-0.0891613	-0.859042	0.272642	2.40271	0.146267	0.895101	0.270463	2.36985	0.0567801	0.421439
NA	ALB	K264k	NA		NA	NA	NA	NA	NA	NA	NA	NA	NA		-0.0526506	-0.573394	-0.150414	-0.576036	0.0977631	0.356433	-0.0255212	-0.100627	0.205547	1.48366	0.17325	1.13693	-0.0891613	-0.859042	0.272642	2.40271	0.146267	0.895101	0.270463	2.36985	0.0567801	0.421439
NA	ALB	K286k	NA		NA	NA	NA	NA	NA	NA	NA	NA	NA		-0.0526506	-0.573394	-0.150414	-0.576036	0.0977631	0.356433	-0.0255212	-0.100627	0.205547	1.48366	0.17325	1.13693	-0.0891613	-0.859042	0.272642	2.40271	0.146267	0.895101	0.270463	2.36985	0.0567801	0.421439
NA	ALB	K298k	NA		NA	NA	NA	NA	NA	NA	NA	NA	NA		-0.0526506	-0.573394	-0.150414	-0.576036	0.0977631	0.356433	-0.0255212	-0.100627	0.205547	1.48366	0.17325	1.13693	-0.0891613	-0.859042	0.272642	2.40271	0.146267	0.895101	0.270463	2.36985	0.0567801	0.421439
NA	ALB	K558k	NA		NA	NA	NA	NA	NA	NA	NA	NA	NA		0.0950958	0.360824	-0.027925	-0.107462	0.123021	0.445707	0.37721	4.24279	0.113773	0.617928	0.607989	11.5245	0.101652	1.04289	0.339656	3.54788	0.0343931	0.141876	0.268857	2.3458	0.137155	1.4947
NA	ALB	K565k	NA		NA	NA	NA	NA	NA	NA	NA	NA	NA		0.0950958	0.360824	-0.027925	-0.107462	0.123021	0.445707	0.37721	4.24279	0.113773	0.617928	0.607989	11.5245	0.101652	1.04289	0.339656	3.54788	0.0343931	0.141876	0.268857	2.3458	0.137155	1.4947
NA	ALB	K569k	NA		NA	NA	NA	NA	NA	NA	NA	NA	NA		0.0950958	0.360824	-0.027925	-0.107462	0.123021	0.445707	0.37721	4.24279	0.113773	0.617928	0.607989	11.5245	0.101652	1.04289	0.339656	3.54788	0.0343931	0.141876	0.268857	2.3458	0.137155	1.4947
NA	ALB	K581k	NA		NA	NA	NA	NA	NA	NA	NA	NA	NA		0.0950958	0.360824	-0.027925	-0.107462	0.123021	0.445707	0.37721	4.24279	0.113773	0.617928	0.607989	11.5245	0.101652	1.04289	0.339656	3.54788	0.0343931	0.141876	0.268857	2.3458	0.137155	1.4947
NA	ALB	K588k	NA		NA	NA	NA	NA	NA	NA	NA	NA	NA		0.0950958	0.360824	-0.027925	-0.107462	0.123021	0.445707	0.37721	4.24279	0.113773	0.617928	0.607989	11.5245	0.101652	1.04289	0.339656	3.54788	0.0343931	0.141876	0.268857	2.3458	0.137155	1.4947
NA	ALB	K597k	NA		NA	NA	NA	NA	NA	NA	NA	NA	NA		0.0950958	0.360824	-0.027925	-0.107462	0.123021	0.445707	0.37721	4.24279	0.113773	0.617928	0.607989	11.5245	0.101652	1.04289	0.339656	3.54788	0.0343931	0.141876	0.268857	2.3458	0.137155	1.4947
NA	ALB	K598k	NA		NA	NA	NA	NA	NA	NA	NA	NA	NA		0.0950958	0.360824	-0.027925	-0.107462	0.123021	0.445707	0.37721	4.24279	0.113773	0.617928	0.607989	11.5245	0.101652	1.04289	0.339656	3.54788	0.0343931	0.141876	0.268857	2.3458	0.137155	1.4947
NA	ALB	K36k	NA		NA	NA	NA	NA	NA	NA	NA	NA	NA		-0.0753256	-0.472568	-0.192226	-0.765811	0.1169	0.463336	-0.0117002	-0.0436685	0.204208	1.46832	0.152782	0.941434	-0.0833115	-0.778824	-0.0712211	-0.337548	0.197846	1.41703	0.126948	0.72977	-0.120892	-1.22645
NA	ALB	K375k	NA		NA	NA	NA	NA	NA	NA	NA	NA	NA		-0.0629027	-0.41057	-0.14829	-1.00356	0.0853869	0.571707	0.208182	1.51409	0.228511	1.76009	0.46211	6.31954	-0.00784417	-0.0473065	0.199136	1.43166	-0.102634	-0.54365	0.0496724	0.217299	0.135586	1.4676
NA	ALB	K186k	NA		NA	NA	NA	NA	NA	NA	NA	NA	NA		0.0298743	0.083631	-0.182578	-0.623437	0.212453	0.703982	0.0336706	0.130459	0.185907	1.1489	0.261049	2.15632	-0.0589819	-0.440689	0.234114	1.85921	0.106142	0.569031	0.130117	0.755817	0.0574981	0.428394
NA	ALB	K396k	NA		NA	NA	NA	NA	NA	NA	NA	NA	NA		0.158239	0.654049	-0.0832196	-0.235366	0.241459	0.804913	0.364413	3.97612	0.121534	0.677335	0.608439	11.5447	0.0937189	0.924121	0.303653	2.8995	0.0411022	0.174016	0.281052	2.53204	0.117964	1.18108
NA	ALB	K402k	NA		NA	NA	NA	NA	NA	NA	NA	NA	NA		0.158239	0.654049	-0.0832196	-0.235366	0.241459	0.804913	0.364413	3.97612	0.121534	0.677335	0.608439	11.5447	0.0937189	0.924121	0.303653	2.8995	0.0411022	0.174016	0.281052	2.53204	0.117964	1.18108
NA	ALB	K413k	NA		NA	NA	NA	NA	NA	NA	NA	NA	NA		0.158239	0.654049	-0.0832196	-0.235366	0.241459	0.804913	0.364413	3.97612	0.121534	0.677335	0.608439	11.5447	0.0937189	0.924121	0.303653	2.8995	0.0411022	0.174016	0.281052	2.53204	0.117964	1.18108
NA	ALB	K426k	NA		NA	NA	NA	NA	NA	NA	NA	NA	NA		0.158239	0.654049	-0.0832196	-0.235366	0.241459	0.804913	0.364413	3.97612	0.121534	0.677335	0.608439	11.5447	0.0937189	0.924121	0.303653	2.8995	0.0411022	0.174016	0.281052	2.53204	0.117964	1.18108
NA	ALB	K456k	NA		NA	NA	NA	NA	NA	NA	NA	NA	NA		0.158239	0.654049	-0.0832196	-0.235366	0.241459	0.804913	0.364413	3.97612	0.121534	0.677335	0.608439	11.5447	0.0937189	0.924121	0.303653	2.8995	0.0411022	0.174016	0.281052	2.53204	0.117964	1.18108
NA	ALB	K463k	NA		NA	NA	NA	NA	NA	NA	NA	NA	NA		0.158239	0.654049	-0.0832196	-0.235366	0.241459	0.804913	0.364413	3.97612	0.121534	0.677335	0.608439	11.5447	0.0937189	0.924121	0.303653	2.8995	0.0411022	0.174016	0.281052	2.53204	0.117964	1.18108
NA	ALB	K490k	NA		NA	NA	NA	NA	NA	NA	NA	NA	NA		0.158239	0.654049	-0.0832196	-0.235366	0.241459	0.804913	0.364413	3.97612	0.121534	0.677335	0.608439	11.5447	0.0937189	0.924121	0.303653	2.8995	0.0411022	0.174016	0.281052	2.53204	0.117964	1.18108
NA	ALB	K75k	NA		NA	NA	NA	NA	NA	NA	NA	NA	NA		-0.0740253	-0.237349	-0.208333	-1.3313	0.134308	0.86901	0.0115286	0.0429984	0.185466	1.26246	0.202373	1.44745	-0.0671167	-0.575632	0.222672	1.71267	-0.0262072	-0.104689	0.113682	0.625256	0.111821	1.0887
NA	ALB	K183k	NA		NA	NA	NA	NA	NA	NA	NA	NA	NA		-0.00922676	-0.0529576	-0.142674	-1.09232	0.133447	0.88874	0.0396451	0.165111	0.169745	1.10215	0.27934	2.46667	-0.0502011	-0.391774	0.378783	4.34729	0.0313591	0.127835	0.1962	1.39849	0.156098	1.84306
NA	ALB	K198k	NA		NA	NA	NA	NA	NA	NA	NA	NA	NA		0.0233864	0.206446	-0.0737138	-0.571129	0.0971002	0.975433	-0.0687798	-0.319321	0.27006	2.32749	0.110676	0.594892	-0.130747	-1.54091	0.148754	0.917533	0.101839	0.53796	0.130655	0.760276	0.0210789	0.128238
NA	ALB	K88k	NA		NA	NA	NA	NA	NA	NA	NA	NA	NA		0.0192882	0.076789	-0.245524	-1.1319	0.264812	1.22179	0.0385343	0.159804	0.193413	1.34776	0.291807	2.6611	-0.0597625	-0.49223	0.259093	2.20256	0.107892	0.581881	0.175879	1.17996	0.0679346	0.534476
NA	ALB	K117k	NA		NA	NA	NA	NA	NA	NA	NA	NA	NA		0.0192882	0.076789	-0.245524	-1.1319	0.264812	1.22179	0.0385343	0.159804	0.193413	1.34776	0.291807	2.6611	-0.0597625	-0.49223	0.259093	2.20256	0.107892	0.581881	0.175879	1.17996	0.0679346	0.534476
NA	ALB	K130k	NA		NA	NA	NA	NA	NA	NA	NA	NA	NA		0.0192882	0.076789	-0.245524	-1.1319	0.264812	1.22179	0.0385343	0.159804	0.193413	1.34776	0.291807	2.6611	-0.0597625	-0.49223	0.259093	2.20256	0.107892	0.581881	0.175879	1.17996	0.0679346	0.534476
NA	ALB	K160k	NA		NA	NA	NA	NA	NA	NA	NA	NA	NA		0.0192882	0.076789	-0.245524	-1.1319	0.264812	1.22179	0.0385343	0.159804	0.193413	1.34776	0.291807	2.6611	-0.0597625	-0.49223	0.259093	2.20256	0.107892	0.581881	0.175879	1.17996	0.0679346	0.534476
NA	ALB	K161k	NA		NA	NA	NA	NA	NA	NA	NA	NA	NA		0.0192882	0.076789	-0.245524	-1.1319	0.264812	1.22179	0.0385343	0.159804	0.193413	1.34776	0.291807	2.6611	-0.0597625	-0.49223	0.259093	2.20256	0.107892	0.581881	0.175879	1.17996	0.0679346	0.534476
NA	ALB	K214k	NA		NA	NA	NA	NA	NA	NA	NA	NA	NA		0.0398031	0.0942396	-0.4285	-1.13151	0.468303	1.47442	0.0246315	0.0967802	0.224881	1.71468	0.233513	1.82373	-0.0772694	-0.699812	0.26668	2.31341	0.16712	1.09164	0.240929	1.94965	0.0447323	0.311137
NA	ALB	K223k	NA		NA	NA	NA	NA	NA	NA	NA	NA	NA		0.0398031	0.0942396	-0.4285	-1.13151	0.468303	1.47442	0.0246315	0.0967802	0.224881	1.71468	0.233513	1.82373	-0.0772694	-0.699812	0.26668	2.31341	0.16712	1.09164	0.240929	1.94965	0.0447323	0.311137
NA	ALB	K236k	NA		NA	NA	NA	NA	NA	NA	NA	NA	NA		0.0398031	0.0942396	-0.4285	-1.13151	0.468303	1.47442	0.0246315	0.0967802	0.224881	1.71468	0.233513	1.82373	-0.0772694	-0.699812	0.26668	2.31341	0.16712	1.09164	0.240929	1.94965	0.0447323	0.311137
NA	ALB	K249k	NA		NA	NA	NA	NA	NA	NA	NA	NA	NA		0.0398031	0.0942396	-0.4285	-1.13151	0.468303	1.47442	0.0246315	0.0967802	0.224881	1.71468	0.233513	1.82373	-0.0772694	-0.699812	0.26668	2.31341	0.16712	1.09164	0.240929	1.94965	0.0447323	0.311137
NA	ALB	K383k	NA		NA	NA	NA	NA	NA	NA	NA	NA	NA								-0.174437	-1.14884	-0.212524	-1.56495	-0.316183	-3.06684	0.0146965	0.0926038	-0.118715	-0.66406	-0.142225	-0.859196	-0.259792	-2.21264	0.0105631	0.0603797
NA	ALB	K543k	NA		NA	NA	NA	NA	NA	NA	NA	NA	NA
NA	ALB	K549k	NA		NA	NA	NA	NA	NA	NA	NA	NA	NA
NA	ALCAM	K580k	NA		NA	NA	NA	NA	NA	NA	NA	NA	NA		0.0950958	0.360824	-0.027925	-0.107462	0.123021	0.445707	0.37721	4.24279	0.113773	0.617928	0.607989	11.5245	0.101652	1.04289	0.339656	3.54788	0.0343931	0.141876	0.268857	2.3458	0.137155	1.4947
Q13740.NAIkEGDNITLK	ALCAM	K261k	ALCAM.K261k		0.5	0.5	0.5	0.25			-0.584963	-0.26967	-0.584963	-0.170176	-0.0718212	-0.552182	-0.151837	-1.55283	0.0800154	0.576525	0.211995	1.55871	0.158016	0.989691	0.449788	5.98214	0.0208289	0.136401	0.184922	1.27484	0.0276715	0.111179	0.143027	0.866261	0.0706527	0.563658
Q13740.TASkHVNK	ALCAM	K559k	ALCAM.K559k		1	0.75	1.5	1	-0.321928	-0.407821	-0.485427	-0.740669	-0.485427	-0.407821							-0.234628	-1.83808	-0.222619	-1.68672	-0.541599	-8.84612	-0.00463367	-0.0273687	0.0275356	0.110574	-0.289386	-2.66412	-0.0973389	-0.50625	0.142393	1.58708
Q8IZ83.TAkEALLVAnGTPR	ALDH16A1	K413k	ALDH16A1.K413k		2.25	3.25	2	2.5	0.485427	0.888034	0.289507	0.266619	0.289507	-0.25292	0.123677	0.652266	0.135755	1.09547	-0.0120774	-0.0412342	-0.0370044	-0.15256	0.260629	2.19082	0.174739	1.15188	-0.114847	-1.25633	0.29951	2.82993	0.10308	0.54685	0.331517	3.39427	0.088256	0.7687
NA	ALDH16A1	K50k	NA		NA	NA	NA	NA	NA	NA	NA	NA	NA		0.0950958	0.360824	-0.027925	-0.107462	0.123021	0.445707	0.37721	4.24279	0.113773	0.617928	0.607989	11.5245	0.101652	1.04289	0.339656	3.54788	0.0343931	0.141876	0.268857	2.3458	0.137155	1.4947
Q8IZ83.DSSGNLHGYVAEGGAkDIR	ALDH16A1	K564k	ALDH16A1.K564k		4.25	4.5	4.5	4	0.0780025	0.112513	-0.160465	-0.740669	-0.160465	1.09415	0.0844634	1.39474	-0.00721332	-0.0633036	0.0916767	1.0106	0.116804	0.640842	0.0982446	0.506194	0.153932	0.951939	0.00716135	0.0429984	0.0185337	0.0718079	-0.0290947	-0.117554	0.0973876	0.506589	0.0213994	0.130432
Q8IZ83.kSTLASR	ALDH16A1	K603k	ALDH16A1.K603k		0.75	0.5	0.25	0.75	-0.415037	-0.171537	1	0.396592	1	-0.623013							0.0570956	0.253949	-0.0962763	-0.492697	-0.0165061	-0.062802	0.059181	0.485866	0.0643085	0.297157	-0.15341	-0.960273	0.0785751	0.382446	0.0978212	0.892138
Q8IZ83.kVAFcGAPEEGR	ALDH16A1	K245k	ALDH16A1.K245k		1	1		0.5			1.58496	0.407821	1.58496	-0.328714
P54886.LAAPLLkR	ALDH18A1	K424k	ALDH18A1.K424k		0.5	0.5	0.25	0.5			0.584963	0.26967	0.584963	-0.249673	-0.294183	-2.30472	0.0335425	0.172646	-0.327725	-3.51236	-0.0157753	-0.0598468	-0.0313152	-0.126297	-0.0778738	-0.373577	0.00599632	0.0357324	0.17907	1.21302	-0.0301718	-0.122424	0.0852793	0.425139	0.0940126	0.841951
P54886.VSGHVITDIVEGkK	ALDH18A1	K347k	ALDH18A1.K347k		1.25	0.25	0.5	0.25	-1.58496	-1.52259	-0.584963	-0.26967	-0.584963	-1.10712							0.0283926	0.113214	0.172298	1.12743	0.0403146	0.16833	-0.055528	-0.446644	-0.0101113	-0.037866	0.135132	0.797884	-0.0477736	-0.207491	-0.065258	-0.506373
P00352.RANNTFYGLSAGVFTKDIDk	ALDH1A1	K439k	ALDH1A1.K439k		0.75	1	0.5	0.5	0.321928	0.204865				-0.196007	-0.0912043	-1.10976	0.113536	0.951907	-0.204741	-1.93198	-0.216065	-1.6071	-0.0912696	-0.459031	-0.316909	-3.07947	-0.0481542	-0.371413	-0.0903498	-0.45856	-0.105907	-0.567314	0.0268663	0.107602	0.00698968	0.0391012
P00352.LIkEAAGK	ALDH1A1	K255k	ALDH1A1.K255k		7.5	6.25	5.75	5.25	-0.253757	-0.408611	-0.125531	-0.311533	-0.125531	-0.318611	-0.483841	-3.41847	-0.352369	-1.77636	-0.131472	-1.80964	-0.0195439	-0.0752634	0.0887059	0.442159	0.0606585	0.273374	-0.0417699	-0.310445	0.0943311	0.485494	-0.138886	-0.830066	0.14838	0.914142	0.104785	0.987506
P00352.LIkEAAGkSNLK	ALDH1A1	K255k	ALDH1A1.K255k		1	0.5	1.5	1	-0.736966	-0.740669	-0.485427	-0.740669	-0.485427		-0.185401	-1.80193	-0.0379814	-0.23761	-0.14742	-1.5989	-0.155854	-0.969614	-0.143073	-0.855022	-0.218151	-1.63222	-0.00493148	-0.0291842	-0.130712	-0.76075	-0.130187	-0.756395	-0.159862	-1.02105	-0.000235828	-0.00126587
P00352.ILDLIESGKkEGAK	ALDH1A1	K363k	ALDH1A1.K363k		2.75	7	5.5	0.75	1.27302	0.758245	-2.52356	-1.59249	-2.52356	1.85514	-0.0341162	-0.394492	0.0485128	0.588282	-0.0826291	-1.10151	0.168193	1.08693	0.0203661	0.0786857	0.24425	1.96457	0.0570416	0.462736	0.0502156	0.220128	0.0101729	0.0381062	-0.00938173	-0.0350297	0.0179912	0.107488
P00352.YILGNPLTPGVTQGPQIDkEQYDK	ALDH1A1	K348k	ALDH1A1.K348k		13	12.75	10	10.5	-0.0274807	-0.0606748	0.0687128	0.443709	0.0687128	-0.472736	-0.0446826	-0.387368	0.0163524	0.093454	-0.061035	-0.715885	0.373876	4.17223	-0.0485064	-0.20893	0.423476	5.30449	0.162983	2.21578	0.145246	0.885967	0.0744429	0.356971	0.137372	0.817013	0.0318121	0.205881
P00352.LLYkLADLIER	ALDH1A1	K91k	ALDH1A1.K91k		5	6	2	1	0.251539	0.556965	-0.847997	-0.342439	-0.847997	1.47225	0.143434	0.796178	0.205704	0.922079	-0.0622702	-0.233742	-0.261485	-2.20302	-0.0690948	-0.32115	-0.340945	-3.51532	-0.0742367	-0.661602	-0.250753	-2.08428	-0.0667815	-0.311407	-0.22097	-1.69144	-0.0826587	-0.700441
P00352.kYILGNPLTPGVTQGPQIDKEQYDK	ALDH1A1	K329k	ALDH1A1.K329k		22.75	20	17.75	17.25	-0.183712	-1.05985	-0.040642	-0.0807071	-0.040642	-0.80693	-0.151896	-1.18414	-0.114252	-1.56219	-0.0376447	-0.231641	0.203257	1.45748	-0.218382	-1.63501	-0.0562898	-0.249618	0.162696	2.20916	0.0414881	0.17591	0.0436459	0.1866	-0.0121635	-0.0459325	-0.000969522	-0.00522776
P00352.YcAGWADkIQGR	ALDH1A1	K139k	ALDH1A1.K139k		10.25	14	10.25	8.5	0.440573	1.18984	-0.263034	-0.466736	-0.263034	2.12161	-0.0691272	-0.569602	-0.0356128	-0.162783	-0.0335144	-0.15684	0.215629	1.60188	0.210465	1.54072	0.517633	8.01528	0.00199269	0.0115683	0.354276	3.83456	-0.0284049	-0.114456	0.195574	1.39146	0.171939	2.16554
P00352.FkSLDDVIKR	ALDH1A1	K412k	ALDH1A1.K412k		7.25	3.5	5.5	1.5	-1	-0.422339	-1.71621	-4.18668	-1.71621	0.130245	0.185644	0.336389	0.255411	0.340584	-0.0697676	-0.150964	0.0190964	0.0734099	0.019282	0.0741778	0.0919551	0.463584	-7.15992e-05	-0.000410438	-0.0845504	-0.420415	-0.13825	-0.824572	-0.218602	-1.66214	0.0241272	0.149411
P00352.LYSNAYLNDLAGcIkTLR	ALDH1A1	K128k	ALDH1A1.K128k		19.75	15.75	17.25	14	-0.321928	-0.709397	-0.296393	-0.520207	-0.296393	-0.217096	0.147702	0.778339	0.195569	0.85	-0.0478674	-0.116318	0.217488	1.62421	-0.118075	-0.650564	0.197675	1.39471	0.129482	1.51715	-0.187069	-1.29792	-0.156319	-0.987447	-0.146324	-0.895607	-0.0138161	-0.0805268
P00352.EQYDkILDLIESGK	ALDH1A1	K353k	ALDH1A1.K353k		1.25	0.25		1.25	-1.58496	-0.888034	2.58496	1.81269	2.58496	-3.15083	0.151853	1.3468	0.166544	0.613035	-0.0146904	-0.111246
P00352.kEGAkLEcGGGPWGNK	ALDH1A1	K363k	ALDH1A1.K363k		1.5	0.5	0.5	0.5	-1.22239	-1.30255				-0.834908	-0.237464	-1.11499	-0.213878	-1.09039	-0.0235863	-0.0411307	0.105428	0.556715	0.273058	2.37194	0.420116	5.22195	-0.0646826	-0.547427	0.145074	0.884426	-0.093703	-0.481204	0.0166854	0.0641691	0.107283	1.02287
P00352.ELGEYGFHEYTEVkTVTVK	ALDH1A1	K490k	ALDH1A1.K490k		2	1.5	0.75	2	-0.36257	-0.320564	1.16993	1.0208	1.16993	-1.81712	-0.0452892	-0.148578	-0.0497736	-0.262776	0.0044844	0.00845646	-0.0625068	-0.283625	-0.0130726	-0.0490602	-0.122089	-0.681676	-0.019075	-0.123555	-0.189641	-1.32585	0.0413756	0.175358	-0.167035	-1.09079	-0.103796	-0.973677
P00352.FkSLDDVIK	ALDH1A1	K412k	ALDH1A1.K412k		16.5	16.75	14.75	9.5	0.0213737	0.0355371	-0.621488	-1.22487	-0.621488	2.32048	0.0249363	0.103695	0.0169142	0.0495571	0.00802216	0.037588	0.0553155	0.24441	0.133132	0.770638	0.0595725	0.267406	-0.0300267	-0.208072	-0.0532797	-0.236278	0.121221	0.683767	-0.0808205	-0.396556	-0.0784032	-0.650472
P00352.EAAGkSNLKR	ALDH1A1	K260k	ALDH1A1.K260k		0.5	1	1.5	0.5	0.736966	0.231404	-1.22239	-1.30255	-1.22239	0.915475	-0.158911	-2.53978	-0.186425	-1.4032	0.0275139	0.0985939	-0.194075	-1.355	0.100184	0.519639	-0.119441	-0.66108	-0.113545	-1.23437	-0.122808	-0.69638	-0.0440263	-0.1885	0.0593763	0.269396	-0.0353966	-0.233766
P00352.LEcGGGPWGNkGYFVQPTVFSNVTDEMR	ALDH1A1	K378k	ALDH1A1.K378k		5.25	4.5	3	0.75	-0.211504	-0.409386	-1.70044	-1.91385	-1.70044	0.938057	-0.0571682	-1.21411	-0.104244	-0.767488	0.047076	0.192492	-0.248618	-2.02355	-0.0339999	-0.138559	-0.203316	-1.45815	-0.0828139	-0.772171	0.141649	0.854141	0.195627	1.39206	0.143235	0.868098	-0.0242522	-0.150294
P00352.FPVFnPATEEELcQVEEGDKEDVDKAVk	ALDH1A1	K65k	ALDH1A1.K65k		1.25	1	0.5	0.25	-0.263034	-0.1066	-0.584963	-0.26967	-0.584963		-0.132679	-1.16002	-0.16431	-1.27596	0.0316313	0.352111	-0.0279935	-0.111449	0.210901	1.54583	0.116377	0.637595	-0.0921812	-0.901908	0.00100158	0.00361338	-0.0270388	-0.108366	0.0413721	0.17534	0.0125986	0.0728987
P00352.KFPVFNPATEEELcQVEEGDkEDVDKAVK	ALDH1A1	K57k	ALDH1A1.K57k		2.75	2.25	0.5	0.5	-0.263034	-0.0984764				-0.136991	0.00930712	0.0148243	-0.149503	-0.26879	0.15881	0.361467	0.165677	1.06247	0.119789	0.663764	0.299769	2.78985	0.0177068	0.113712	0.242304	1.96819	0.149572	0.924977	0.101668	0.536745	0.0416646	0.284947
P00352.VAFTGSTEVGkLIK	ALDH1A1	K252k	ALDH1A1.K252k		10.5	13.25	13.75	11.25	0.328623	1.34462	-0.283793	-1.66924	-0.283793	2.44201	-0.0233309	-0.0576455	-0.106897	-0.424146	0.0835661	0.396967	0.0402888	0.168206	0.218882	1.64106	0.212903	1.56943	-0.068913	-0.596831	0.0900492	0.456552	0.142283	0.859703	0.156725	0.991273	-0.0234685	-0.144777
NA	ALDH1A1	K17k	NA		NA	NA	NA	NA	NA	NA	NA	NA	NA		0.0950958	0.360824	-0.027925	-0.107462	0.123021	0.445707	0.37721	4.24279	0.113773	0.617928	0.607989	11.5245	0.101652	1.04289	0.339656	3.54788	0.0343931	0.141876	0.268857	2.3458	0.137155	1.4947
NA	ALDH1A1	K495k	NA		NA	NA	NA	NA	NA	NA	NA	NA	NA		0.0950958	0.360824	-0.027925	-0.107462	0.123021	0.445707	0.37721	4.24279	0.113773	0.617928	0.607989	11.5245	0.101652	1.04289	0.339656	3.54788	0.0343931	0.141876	0.268857	2.3458	0.137155	1.4947
P00352.EAAGkSNLK	ALDH1A1	K260k	ALDH1A1.K260k		1	1.5	0.75	0.25	0.485427	0.328714	-1	-0.396592	-1	0.849474	0.0550398	0.194218	-0.114981	-0.385506	0.170021	0.51829	0.202415	1.44792	-0.0509473	-0.221466	0.297363	2.75057	0.097764	0.983804	0.0329513	0.135165	-0.0536614	-0.238313	-0.053732	-0.23869	0.0389151	0.262114
P00352.IAkEEIFGPVQQImK	ALDH1A1	K398k	ALDH1A1.K398k		30	32.25	26.75	21	0.103505	0.697447	-0.345497	-1.48892	-0.345497	2.08674	0.11361	0.26961	-0.0527031	-0.179424	0.166313	0.542668	-0.00467527	-0.0169609	0.461497	6.30242	0.396823	4.67364	-0.17988	-2.62569	0.182936	1.25368	0.194055	1.37451	0.181792	1.24157	-0.0049957	-0.0276099
P00352.EGAkLEcGGGPWGNK	ALDH1A1	K367k	ALDH1A1.K367k		3.75	5.25	2.75	1.25	0.459432	1.16363	-1	-1.36094	-1	2.44957	0.0703553	0.836768	0.0272855	0.224511	0.0430698	0.66272	-0.240159	-1.91022	0.141735	0.843425	-0.257164	-2.14179	-0.14736	-1.87177	-0.337308	-3.50313	-0.0586563	-0.265416	-0.287026	-2.62631	-0.125198	-1.29479
P00352.ILDLIESGKk	ALDH1A1	K363k	ALDH1A1.K363k		9.75	11	13.75	9.5	0.169925	0.401229	-0.521953	-1.94772	-0.521953	1.7501	0.556395	0.961972	0.000575496	0.0009409	0.555819	0.930117	-0.00371171	-0.0134126	-0.0235184	-0.0920031	-0.0197925	-0.0762962	0.00764273	0.0460318	-0.209366	-1.55048	0.0108753	0.0408539	-0.058469	-0.264384	-0.0989546	-0.907341
P00352.IFINNEWHDSVSGkK	ALDH1A1	K36k	ALDH1A1.K36k		10.5	10	11.75	9.25	-0.0687128	-0.1078	-0.337035	-1.02856	-0.337035	0.606034	0.313004	0.90478	-0.00754326	-0.0264985	0.320547	1.39623	0.0033711	0.0121649	0.279222	2.46487	0.265824	2.26552	-0.106442	-1.11805	0.0897958	0.454861	0.133224	0.781751	0.00844556	0.0314141	-0.0195122	-0.117622
P00352.SLDDVIkR	ALDH1A1	K419k	ALDH1A1.K419k		4.75	3.5	5.25	4.25	-0.415037	-0.84869	-0.289507	-0.720981	-0.289507	-0.171537	0.150522	1.30845	-0.0600709	-0.555266	0.210593	2.03162	0.225117	1.71762	0.00247649	0.00890406	0.376704	4.23203	0.0859095	0.813994	-0.121198	-0.683583	0.0402786	0.169989	0.109367	0.5928	-0.0725514	-0.584429
P00352.IAKEEIFGPVQQIMkFK	ALDH1A1	K410k	ALDH1A1.K410k		14.25	13.25	12.5	7	-0.103093	-0.0958219	-0.814444	-0.789758	-0.814444	0.635983							0.0458031	0.195282	-0.0881205	-0.438341	-0.06958	-0.323975	0.0516766	0.406698	-0.0208473	-0.081523	-0.0390993	-0.164262	0.00561952	0.0206623	0.00820062	0.0462129
P00352.AnNTFYGLSAGVFTkDIDK	ALDH1A1	K435k	ALDH1A1.K435k		6.25	5.25	6.75	5	-0.241008	-0.478887	-0.415037	-1.03244	-0.415037	0.423011							0.160371	1.01179	0.164208	1.04831	0.362747	3.9422	-0.0014806	-0.00856653	0.153332	0.95955	-0.0613329	-0.280304	0.136016	0.805405	0.0964493	0.8739
P00352.EEIFGPVQQIMkFK	ALDH1A1	K410k	ALDH1A1.K410k		5.75	5.75	5.5	5			-0.131245	-0.328714	-0.131245	-0.462985							0.00697603	0.0255449	0.236849	1.86686	0.046358	0.198063	-0.0887001	-0.852584	-0.0626504	-0.281992	0.0976853	0.499904	-0.0722734	-0.341127	-0.0708796	-0.5614
P00352.kFPVFNPATEEELcQVEEGDKEDVDK	ALDH1A1	K37k	ALDH1A1.K37k		7.75	7.25	7.25	8	-0.0931094	-0.098344	0.137504	0.190094	0.137504	-0.340972							0.230369	1.78358	0.17694	1.17414	0.383825	4.38505	0.0206165	0.134831	0.31736	2.40249	0.146513	0.59716	0.418459	3.5082	0.113391	0.75204
P00352.kYILGNPLTPGVTQGPQIDK	ALDH1A1	K329k	ALDH1A1.K329k		2	2.75	0.75	1.75	0.415037	0.667218	1	0.888034	1	-0.177285
P00352.AkkYILGNPLTPGVTQGPqIDKEQYDK	ALDH1A1	K328k	ALDH1A1.K328k		0.75	0.5	0.25	0.25	-0.415037	-0.170176				-0.170176							-0.139383	-0.823215	-0.213398	-1.5753	-0.390759	-4.53749	0.0285599	0.196151	-0.226175	-1.75683	0.238998	1.92378	-0.117775	-0.656734	-0.209002	-3.03937
NA	ALDH1A3	K44k	NA		NA	NA	NA	NA	NA	NA	NA	NA	NA		-0.0368159	-0.508874	0.0463112	0.356167	-0.0831271	-1.10622	0.3002	2.79693	0.0465653	0.199105	0.42168	5.26027	0.097869	0.985378	-0.0272817	-0.109444	-0.0100951	-0.0378029	0.0781863	0.380022	-0.00772193	-0.0433896
NA	ALDH1A3	K394k	NA		NA	NA	NA	NA	NA	NA	NA	NA	NA		-0.0368159	-0.508874	0.0463112	0.356167	-0.0831271	-1.10622	0.3002	2.79693	0.0465653	0.199105	0.42168	5.26027	0.097869	0.985378	-0.0272817	-0.109444	-0.0100951	-0.0378029	0.0781863	0.380022	-0.00772193	-0.0433896
P47895.ILELIESGKk	ALDH1A3	K374k	ALDH1A3.K374k		0.25	1			1.32193	0.748885		NA		-0.786465	-0.0237424	-0.100203	-0.0916593	-1.21414	0.0679169	0.683594	0.269308	2.31643	0.210029	1.53562	0.452947	6.06739	0.0228737	0.151706	-0.138425	-0.826083	0.264871	2.2867	0.0921496	0.470661	-0.181201	-2.36784
P47895.IQGkTIPTDDNVVcFTR	ALDH1A3	K154k	ALDH1A3.K154k		2	1	0.75	1.75	-0.847997	-1.03753	1	0.888034	1	-2.05668	0.162874	1.77281	0.0433137	0.284077	0.11956	0.851342	0.0255669	0.100825	0.200003	1.42071	0.158643	0.995549	-0.0673089	-0.577885	0.00902038	0.0336309	0.0831478	0.411382	0.0281047	0.113113	-0.0333055	-0.217378
P47895.TEQGPQIDQkQFDK	ALDH1A3	K360k	ALDH1A3.K360k		0.75	0.75	0.75	0.25			-1	-0.683964	-1	0.683964							-0.210203	-1.53766	-0.0348347	-0.14242	-0.259214	-2.17072	-0.0676688	-0.582112	0.0178313	0.0688923	0.33708	3.49882	0.267446	2.32478	-0.143439	-1.60588
P47895.IAkEEIFGPVQPILK	ALDH1A3	K409k	ALDH1A3.K409k		1.25	2.5	0.75	1.75	0.874469	1.75778	1	0.888034	1	-0.26967							0.0376293	0.155509	-0.0440871	-0.186747	-0.019351	-0.0744635	0.0315316	0.2205	-0.153088	-0.957283	0.139774	0.837768	-0.053287	-0.236317	-0.131583	-1.39967
P47895.IAFTGSTEVGkLVK	ALDH1A3	K263k	ALDH1A3.K263k			1		0.5	2.32193	0.740669	1.58496	0.740669	1.58496	-0.320564							0.22531	1.72001	0.229607	1.77393	0.362943	3.94619	-0.0016582	-0.00960533	0.0422931	0.179879	0.0604707	0.27548	0.126028	0.722292	-0.00816722	-0.0460154
P30837.GFFIkPTVFGGVQDDMR	ALDH1B1	K399k	ALDH1B1.K399k		0.75	0.25			-1	-0.683964		NA		-0.855968	-0.150626	-1.70025	-0.123199	-1.07225	-0.0274273	-0.0774109	0.124635	0.701747	0.272195	2.3591	0.441439	5.76095	-0.0569382	-0.46163	0.175591	1.17701	-0.0669599	-0.312444	0.0561243	0.251567	0.108978	1.04722
P30837.IAkEEIFGPVQPLFK	ALDH1B1	K414k	ALDH1B1.K414k		1.75	2	0.5	1.5	0.169925	0.14814	1.22239	0.834908	1.22239	-0.516764	-0.0368195	-0.0700584	-0.151875	-0.418508	0.115055	0.271082	0.00301565	0.0108665	0.046261	0.197576	0.105793	0.559336	-0.0166869	-0.106477	0.143754	0.716584	0.141265	0.749189	0.0122925	0.043028	-0.00566068	-0.0265392
P05091.TEQGPQVDETQFkK	ALDH2	K368k	ALDH2.K368k		1.5	1.5	2	1			-0.847997	-1.03753	-0.847997	1.39234	0.143434	0.796178	0.205704	0.922079	-0.0622702	-0.233742	-0.261485	-2.20302	-0.0690948	-0.32115	-0.340945	-3.51532	-0.0742367	-0.661602	-0.250753	-2.08428	-0.0667815	-0.311407	-0.22097	-1.69144	-0.0826587	-0.700441
P05091.QEGAkLLcGGGIAADR	ALDH2	K383k	ALDH2.K383k		0.5		0.5	0.25	-1.58496	-0.740669	-0.584963	-0.26967	-0.584963	-0.407821	-0.104181	-0.407707	-0.112124	-0.203997	0.00794301	0.0106314	-0.245751	-1.98473	0.0683092	0.316594	-0.138213	-0.813256	-0.121185	-1.36612	-0.133421	-0.783408	0.0663135	0.308694	-0.0553175	-0.247201	-0.0897407	-0.787294
P05091.VIQVAAGSSNLkR	ALDH2	K280k	ALDH2.K280k		2	2.5	2.5	1.25	0.289507	0.740669	-0.874469	-1.75778	-0.874469	2.40257	0.151896	0.720163	-0.00189468	-0.00389321	0.15379	0.692529	-0.233866	-1.82826	0.238716	1.89125	-0.169855	-1.10324	-0.182353	-2.68912	-0.206138	-1.51245	-0.0715722	-0.339646	-0.17068	-1.12712	-0.0604606	-0.457556
P05091.kILGYINTGK	ALDH2	K369k	ALDH2.K369k		1.5	1		0.25	-0.485427	-0.443709	1	0.407821	1	-0.748885	0.405905	2.42437	0.0445507	0.135408	0.361354	1.15641	0.336469	3.43145	0.0332621	0.135166	0.497205	7.35616	0.116997	1.29304	0.230467	1.81178	0.0644476	0.297953	0.183162	1.25608	0.0745925	0.607116
P05091.ILGYINTGkQEGAK	ALDH2	K378k	ALDH2.K378k		2.25	2.75	3	2.75	0.263034	0.683964	-0.115477	-0.118718	-0.115477	-0.396705							0.258131	2.1048	-0.193519	-1.27222	0.0490472	0.209815	0.176297	2.40957	0.00477871	0.0133215	0.156456	0.575427	0.163018	0.568406	-0.0595409	-0.299236
P05091.VVGNPFDSkTEQGPQVDETQFK	ALDH2	K355k	ALDH2.K355k		3.25	3.5	4.25	6.25	0.0995357	0.170176	0.530515	1.5939	0.530515	-1.34807							0.248146	2.01712	0.0260176	0.102784	0.312122	2.99685	0.0857117	0.81129	0.0548441	0.244651	-0.0521465	-0.230267	-0.141036	-0.848769	0.0480709	0.340505
P30838.YPPSPAkMTQH	ALDH3A1	K449k	ALDH3A1.K449k		13.5	4.5	31.25	21.5	-1.53343	-1.95891	-0.534336	-2.95343	-0.534336	-0.222979	-0.538391	-2.72484	0.106445	0.187167	-0.644837	-6.12599	-0.0170408	-0.0649746	-0.196687	-1.38376	-0.244607	-1.96936	0.0693195	0.601674	-0.0144351	-0.0550138	-0.0498249	-0.218092	-0.0725424	-0.345467	0.0159006	0.0938311
P30838.SLkEFYGEDAKK	ALDH3A1	K269k	ALDH3A1.K269k		1.75	0.5	5.75	4	-1.41504	-0.705133	-0.4975	-0.583987	-0.4975	-0.443709	0.115912	0.859543	0.271919	0.953349	-0.156008	-0.547527	-0.2404	-1.9134	0.0974163	0.500496	-0.197421	-1.39189	-0.130352	-1.53347	-0.169556	-1.11586	0.112073	0.613065	0.0279122	0.112253	-0.126536	-1.31642
P30838.PLmNDEGLkVR	ALDH3A1	K440k	ALDH3A1.K440k		6	4.25	12.25	7.5	-0.473931	-0.635175	-0.68966	-1.42828	-0.68966	1.35029	0.110794	1.03476	0.14448	1.74641	-0.033686	-0.532543	0.106118	0.561672	0.0865869	0.4284	0.0947464	0.482309	0.00753636	0.0453599	0.0724433	0.344871	-0.0579774	-0.26168	-0.00184532	-0.00668054	0.0585981	0.439135
P30838.DLYPVInGGVPETTELLkER	ALDH3A1	K178k	ALDH3A1.K178k		7.25	6.25	8.25	8	-0.206451	-0.358296	-0.0430687	-0.204865	-0.0430687	-0.250447	-0.151896	-1.18414	-0.114252	-1.56219	-0.0376447	-0.231641	0.203257	1.45748	-0.218382	-1.63501	-0.0562898	-0.249618	0.162696	2.20916	0.0414881	0.17591	0.0436459	0.1866	-0.0121635	-0.0459325	-0.000969522	-0.00522776
P30838.FMNSGQTcVAPDYILcDPSIQNQIVEkLK	ALDH3A1	K263k	ALDH3A1.K263k		1.75	1	4.75	1.75	-0.678072	-0.337062	-1.32193	-1.23478	-1.32193	1.64933	-0.0288999	-0.0798849	0.0493984	0.100757	-0.0782983	-0.161064	0.10547	0.557017	0.365757	4.00361	0.409342	4.96326	-0.100436	-1.02423	0.206145	1.51252	0.164844	1.06925	0.218691	1.66323	0.0185565	0.111235
P30838.SLkEFYGEDAK	ALDH3A1	K269k	ALDH3A1.K269k		2.75	2.25	5	4.75	-0.263034	-0.311533	-0.0703893	-0.108112	-0.0703893	-0.117317	-0.0499468	-0.0929695	-0.00891661	-0.029984	-0.0410302	-0.145329	0.0806932	0.39101	0.141016	0.837225	0.215522	1.6006	-0.0232767	-0.154764	0.248817	2.05734	0.141879	0.856155	0.144329	0.877796	0.0480472	0.340292
P30838.EKPLALYMFSSNDkVIK	ALDH3A1	K372k	ALDH3A1.K372k		3.75	2.5	10	6	-0.540568	-0.705133	-0.713696	-1.70039	-0.713696	-1.18021	0.14582	0.430774	0.138633	0.529195	0.00718706	0.0120956	-0.249108	-2.03022	-0.120987	-0.673065	-0.422017	-5.26854	-0.0494377	-0.384133	-0.0993407	-0.520259	-0.0445305	-0.191027	-0.190717	-1.33762	-0.0246263	-0.152943
P30838.HLTPVTLELGGkSPcYVDkNcDLDVAcR	ALDH3A1	K214k	ALDH3A1.K214k		1	0.5	5.5		-0.736966	-0.170176	-4.52356	-0.904683	-4.52356	2.67195	-0.0169198	-0.0477101	-0.119439	-0.583473	0.102519	0.330969	0.343169	3.55746	0.0645779	0.295256	0.491976	7.19423	0.107499	1.13499	0.205267	1.50226	0.0508775	0.223589	0.256662	2.16769	0.0693671	0.549775
P30838.SPcYVDkNcDLDVAcRR	ALDH3A1	K221k	ALDH3A1.K221k		1	0.5	4.75		-0.736966	-0.231404	-4.32193	-2.31711	-4.32193	2.46601	-0.0169198	-0.0477101	-0.119439	-0.583473	0.102519	0.330969	0.343169	3.55746	0.0645779	0.295256	0.491976	7.19423	0.107499	1.13499	0.205267	1.50226	0.0508775	0.223589	0.256662	2.16769	0.0693671	0.549775
P30838.IImTAAAkHLTPVTLELGGK	ALDH3A1	K202k	ALDH3A1.K202k		9.25	5.25	23.25	13.5	-0.788496	-1.53616	-0.773229	-2.97146	-0.773229	-2.37016	0.148601	0.594519	0.0464144	0.253395	0.102187	0.371768	0.0151223	0.05722	-0.00522539	-0.018999	0.00869107	0.0320466	0.00785148	0.0473529	-0.139382	-0.834364	-0.235493	-1.87732	-0.165689	-1.07753	0.0431828	0.297813
P30838.ScLVRPLMNDEGLkVR	ALDH3A1	K440k	ALDH3A1.K440k		11.5	7	27.75	12	-0.696608	-2.10076	-1.19265	-4.5285	-1.19265	3.53945	0.0703553	0.836768	0.0272855	0.224511	0.0430698	0.66272	-0.240159	-1.91022	0.141735	0.843425	-0.257164	-2.14179	-0.14736	-1.87177	-0.337308	-3.50313	-0.0586563	-0.265416	-0.287026	-2.62631	-0.125198	-1.29479
P30838.IAWGkFMNSGqTcVAPDYILcDPSIQNQIVEK	ALDH3A1	K236k	ALDH3A1.K236k		1.25	0.25	2	0.75	-1.58496	-0.888034	-1.16993	-0.646745	-1.16993	-0.295831	0.0703553	0.836768	0.0272855	0.224511	0.0430698	0.66272	-0.240159	-1.91022	0.141735	0.843425	-0.257164	-2.14179	-0.14736	-1.87177	-0.337308	-3.50313	-0.0586563	-0.265416	-0.287026	-2.62631	-0.125198	-1.29479
P30838.kSFETFSHR	ALDH3A1	K417k	ALDH3A1.K417k		3	2.25	10.5	4.75	-0.378512	-0.378828	-1.10434	-1.6885	-1.10434	3.38179	0.0703553	0.836768	0.0272855	0.224511	0.0430698	0.66272	-0.240159	-1.91022	0.141735	0.843425	-0.257164	-2.14179	-0.14736	-1.87177	-0.337308	-3.50313	-0.0586563	-0.265416	-0.287026	-2.62631	-0.125198	-1.29479
P30838.SPcYVDkNcDLDVAcR	ALDH3A1	K221k	ALDH3A1.K221k		16	10.25	27.5	17.25	-0.63005	-2.46016	-0.665133	-3.38556	-0.665133	-2.79521	0.175715	1.90025	0.0482368	0.212121	0.127478	1.46871	-0.186961	-1.27829	-0.108247	-0.57709	-0.284521	-2.54641	-0.030373	-0.210915	-0.0402548	-0.169872	-0.0647023	-0.299412	0.0467405	0.202207	0.0109843	0.0629464
P30838.ISEAVkR	ALDH3A1	K9k	ALDH3A1.K9k		1	0.75	5	2	-0.321928	-0.14814	-1.22239	-2.28334	-1.22239	2.79348							-0.0772561	-0.369797	-0.106108	-0.561602	-0.321096	-3.15285	0.0111331	0.0685762	-0.148711	-0.917146	-0.27565	-2.44852	-0.148825	-0.918183	0.0570338	0.423892
P30838.KSLkEFYGEDAK	ALDH3A1	K269k	ALDH3A1.K269k				1.75	0.75		NA	-1	-1.52259	-1	-1.55271							0.0971608	0.498744	-0.106763	-0.566321	-0.0675178	-0.312027	0.0786871	0.718005	-0.0803644	-0.393675	-0.0397793	-0.167558	-0.0834567	-0.413364	-0.0182349	-0.1091
P30838.EkPLALYMFSSNDK	ALDH3A1	K360k	ALDH3A1.K360k		2.25	1	6.75	3.25	-1	-1.81269	-1	-2.28146	-1	-1.73946							-0.188411	-0.370337	0.00299338	0.00535313	-0.0878733	-0.192118	-0.0762094	-0.214861	-0.0501859	-0.0496379	-0.252013	-0.849679	-0.0349964	-0.0539137	0.160377	0.589076
P30838.HLTPVTLELGGkSPcYVDK	ALDH3A1	K214k	ALDH3A1.K214k		0.75	0.25	2	1	-1	-0.683964	-0.847997	-0.872978	-0.847997	-0.462985							-0.0370711	-0.152874	-0.136718	-0.800605	-0.232479	-1.81046	0.0384504	0.28024	0.0526642	0.233007	0.117861	0.657407	0.0704287	0.332829	-0.0292931	-0.186877
P30838.VMGLIEGQkVAYGGTGDAATR	ALDH3A1	K302k	ALDH3A1.K302k		25.5	17	66.75	37.25	-0.577976	-2.52954	-0.83727	-2.53764	-0.83727	4.50022							0.0458031	0.195282	-0.0881205	-0.438341	-0.06958	-0.323975	0.0516766	0.406698	-0.0208473	-0.081523	-0.0390993	-0.164262	0.00561952	0.0206623	0.00820062	0.0462129
P30838.EFYGEDAkK	ALDH3A1	K277k	ALDH3A1.K277k		3.25	2.25	5.25	4.75	-0.485427	-0.667489	-0.137504	-0.683964	-0.137504	-0.299374							-0.19375	-1.35145	-0.144851	-0.870542	-0.302298	-2.8315	-0.0188688	-0.122061	-0.0988153	-0.516567	-0.128925	-0.745973	-0.115007	-0.635372	0.0135285	0.0787149
NA	ALDH3A1	K3k	NA		NA	NA	NA	NA	NA	NA	NA	NA	NA								0.258293	2.1577	0.208619	1.51917	0.543369	8.91009	0.0191675	0.124226	-0.0148347	-0.0547323	-0.132152	-0.763791	0.0922443	0.451361	0.0530727	0.381881
P51648.ILSLLEGQkIAFGGETDEATR	ALDH3A2	K299k	ALDH3A2.K299k		1.5	2	0.5	1	0.36257	0.443709	0.736966	0.740669	0.736966		-0.0939611	-0.41248	0.149038	0.563686	-0.242999	-1.11116	0.0923632	0.466303	0.0189021	0.072607	0.0902326	0.452176	0.0283461	0.19443	0.263034	2.25975	-0.0714737	-0.339057	0.164616	1.06702	0.150295	1.73211
P51648.VDWGkFFLLK	ALDH3A2	K452k	ALDH3A2.K452k		0.5	0.75	0.25	0.25	0.415037	0.136451				-0.177285	0.128911	1.28481	0.155586	0.794359	-0.0266747	-0.026501	-0.314105	-3.03091	0.20333	1.45831	-0.113431	-0.615367	-0.19966	-3.15859	-0.144902	-0.882897	-0.0469008	-0.203025	-0.130023	-0.755036	-0.0440321	-0.305092
P51648.YIAPTVLTDVDPKTk	ALDH3A2	K326k	ALDH3A2.K326k		2.25	1.5	1.5	1.75	-0.514573	-0.494469	0.192645	0.26967	0.192645	-0.849474	0.144714	0.817583	0.0441181	0.167636	0.100596	0.426897	-0.114211	-0.621221	0.0702932	0.328143	-0.0659541	-0.303069	-0.071194	-0.624226	0.0034323	0.0125073	0.0745412	0.357569	-0.0124245	-0.0469678	-0.0319492	-0.20693
P51648.SPcYIDkDcDLDIVcR	ALDH3A2	K218k	ALDH3A2.K218k		2.5	2.75	2.75	1.75	0.125531	0.171537	-0.584963	-0.720981	-0.584963	0.941712	0.122048	0.470223	-0.0433058	-0.283778	0.165354	1.14082	-0.222901	-1.69019	-0.0889125	-0.443509	-0.394658	-4.62473	-0.0517017	-0.406954	-0.182119	-1.22987	-0.256747	-2.03091	-0.262783	-2.2032	0.0270612	0.166794
P51648.EFYGENIkESPDYER	ALDH3A2	K274k	ALDH3A2.K274k		1	2	1.5	0.5	0.847997	0.740669	-1.22239	-0.64267	-1.22239	1.49755							0.130548	0.749374	-0.0783646	-0.376591	0.0824378	0.401944	0.0806122	0.743048	-0.0121934	-0.046051	-0.11056	-0.601703	0.037307	0.155648	0.0441964	0.306506
NA	ALDH3A2	K266k	NA		NA	NA	NA	NA	NA	NA	NA	NA	NA
P43353.FLQENkQLLHDALAQDLHK	ALDH3B1	K41k	ALDH3B1.K41k		5	2.5	2.5	0.5	-0.932886	-0.47856	-1.87447	-0.530984	-1.87447	0.114052	-0.740412	-0.901684	-0.224554	-0.431494	-0.515859	-1.87537	-0.0307856	-0.123906	0.0479544	0.206123	0.0591327	0.265001	-0.0303831	-0.210998	0.110141	0.598571	0.002422	0.00878916	-0.0646529	-0.299129	0.0483984	0.343434
NA	ALDH3B1	K148k	NA		NA	NA	NA	NA	NA	NA	NA	NA	NA		-0.193578	-0.261484	0.0567406	0.0377863	-0.250319	-0.264626	0.0832043	0.406783	-0.0408377	-0.170855	0.111962	0.60441	0.0478636	0.368554	0.0698374	0.329323	-0.150545	-0.933867	0.0333161	0.136856	0.0990181	0.908197
P43353.IVMTAAAkHLTPVTLELGGK	ALDH3B1	K202k	ALDH3B1.K202k		2.75	2	0.5	1.25	-0.415037	-0.553925	1	0.494469	1	-1.25575	0.151888	0.547061	0.131754	0.456909	0.0201344	0.0292242	0.0969492	0.497295	0.236298	1.8597	0.399617	4.73728	-0.0537701	-0.428233	0.00217399	0.00788111	0.130493	0.75893	0.138577	0.827399	-0.0576537	-0.429907
P43353.SPGMEkLNALR	ALDH3B1	K437k	ALDH3B1.K437k		6	6.5	8	5	0.111031	0.158081	-0.652077	-1.29818	-0.652077	1.51202	-0.000565616	-0.00360535	-0.0404869	-0.159587	0.0399213	0.191634	0.0824546	0.40205	0.0642595	0.293458	0.0694314	0.323109	0.00702087	0.0421165	-0.150481	-0.933275	0.213149	1.5957	-0.100616	-0.529267	-0.163379	-1.98766
P43353.VGkIVmTAAAK	ALDH3B1	K194k	ALDH3B1.K194k		1.75	1.5	1.75	2	-0.192645	-0.170176	0.169925	0.195439	0.169925	-0.407821	0.216956	1.44919	0.156544	1.03341	0.0604117	0.546388	0.0850922	0.418795	0.350142	3.69164	0.337948	3.45902	-0.102274	-1.0525	-0.0796866	-0.389407	0.309587	3.00093	0.183361	1.25819	-0.174901	-2.22911
P43353.EKPLALYAFSNSSQVVkR	ALDH3B1	K375k	ALDH3B1.K375k		2	1.5	2	1.5	-0.36257	-0.740669	-0.36257	-0.328714	-0.36257		0.0389368	0.142449	-0.119651	-0.576145	0.158588	0.743721	-0.0826877	-0.403519	-0.134442	-0.78152	-0.283731	-2.53416	0.0199701	0.130078	-0.179433	-1.2168	-0.139084	-0.831781	-0.156913	-0.993044	-0.0181286	-0.108396
P43353.VPkNLATQLDSAFIR	ALDH3B1	K89k	ALDH3B1.K89k		4.5	3.5	2.75	2.75	-0.341037	-0.569777				-0.579245	0.118092	0.906357	-0.0926084	-0.658478	0.2107	1.54239	0.0856267	0.42222	-0.0238196	-0.0932919	0.1576	0.985812	0.0422316	0.314726	0.228869	1.79122	-0.0136356	-0.0517991	0.104194	0.554874	0.108958	1.04693
P43353.HLTPVTLELGGkNPcYVDDNcDPQTVANR	ALDH3B1	K214k	ALDH3B1.K214k		5	3.75	4.75	4	-0.392317	-1.32006	-0.234465	-0.553925	-0.234465	-0.462985	-0.0647385	-0.134792	-0.2877	-0.688997	0.222961	2.20015	0.075433	0.35872	0.0572783	0.254934	0.0914634	0.460317	0.00700529	0.0420188	0.0814068	0.400272	-0.146516	-0.897336	0.0614121	0.280749	0.102406	0.954401
P43353.IINQkQFQR	ALDH3B1	K289k	ALDH3B1.K289k		3.75	2.5	3	3	-0.540568	-0.831308				-0.61998							0.0269804	0.0415445	-0.280201	-0.668448	-0.52203	-1.72562	0.114188	0.383637	0.26619	0.728908	-0.357017	-0.815784	0.0500136	0.0705499	0.245333	1.11491
P49419.STcTINYSkDLPLAQGIK	ALDH7A1	K528k	ALDH7A1.K528k		0.75	0.5	0.5		-0.415037	-0.26967	-1.58496	-0.740669	-1.58496	0.346609	0.00847402	0.0587364	0.0445245	0.542775	-0.0360505	-0.41524	-0.195917	-1.37524	-0.257602	-2.14796	-0.463325	-6.35351	0.0238024	0.158775	-0.26667	-2.31326	-0.0828693	-0.409597	-0.142482	-0.861462	-0.0825818	-0.699524
P49419.QGLSSSIFTkDLGR	ALDH7A1	K462k	ALDH7A1.K462k		1	1	0.25	0.25		NA					0.301777	0.914144	-1.03039	-0.528998	1.33216	3.44016	0.0538799	0.236797	0.146878	0.888407	0.267107	2.28419	-0.0358846	-0.257583	-0.109674	-0.59509	0.139446	0.834916	-0.149408	-0.923484	-0.11193	-1.0903
P49189.VEPADASGTEkAFEPATGR	ALDH9A1	K30k	ALDH9A1.K30k		2.5	2.75	2.75	2	0.125531	0.26967	-0.415037	-1.23906	-0.415037	1.55271	-0.15848	-0.276711	0.18764	0.423539	-0.34612	-0.829118	0.0748421	0.355157	0.0859395	0.42423	0.146903	0.888631	-0.00428211	-0.0252343	0.0300529	0.121884	0.0370294	0.154324	0.0358562	0.148756	-0.00313454	-0.0171279
NA	ALDH9A1	K83k	NA		NA	NA	NA	NA	NA	NA	NA	NA	NA		0.144148	1.48319	0.0652614	0.297553	0.0788864	0.501951	-0.176604	-1.17073	-0.28641	-2.57587	-0.507034	-7.66791	0.0423707	0.31602	-0.180675	-1.22981	-0.200549	-1.44777	-0.0682124	-0.319754	0.00892925	0.0505409
P49189.IWSQkSGMER	ALDH9A1	K68k	ALDH9A1.K68k		0.75	0.25	2	1.5	-1	-0.396592	-0.36257	-0.443709	-0.36257		0.0389368	0.142449	-0.119651	-0.576145	0.158588	0.743721	-0.0826877	-0.403519	-0.134442	-0.78152	-0.283731	-2.53416	0.0199701	0.130078	-0.179433	-1.2168	-0.139084	-0.831781	-0.156913	-0.993044	-0.0181286	-0.108396
P49189.EQGAkVLcGGDIYVPEDPK	ALDH9A1	K352k	ALDH9A1.K352k		2	2	1.5	2.5			0.652077	0.834908	0.652077	-1.01004	0.596366	1.88222	0.356529	2.81967	0.239837	2.73905	-0.43962	-5.71353	0.240374	1.91306	-0.28244	-2.5142	-0.262387	-5.27795	-0.0174489	-0.0673114	-0.147266	-0.904082	-0.0336942	-0.138614	0.058327	0.436478
P04075.ENLkAAQEEYVkR	ALDOA	K322k	ALDOA.K322k		1.5	0.5	0.5	0.75	-1.22239	-1.30255	0.415037	0.171537	0.415037	-1.11702	-0.286047	-1.83211	-0.0812385	-0.330628	-0.204809	-1.34236	0.054169	0.238324	0.136499	0.798755	0.0883574	0.439884	-0.0317682	-0.222472	0.0359915	0.149395	-0.182435	-1.24837	0.0176888	0.0683026	0.0981391	0.89639
P04075.PYQYPALTPEQkK	ALDOA	K13k	ALDOA.K13k		5.5	7.25	6.25	5	0.383329	0.856569	-0.308122	-1.0208	-0.308122	1.51448	-0.20356	-0.286818	0.30035	0.736391	-0.503911	-1.28667	0.0977445	0.50275	0.316771	3.07707	0.230411	1.78412	-0.0845149	-0.795025	-0.138847	-0.829729	0.129874	0.753801	-0.00943767	-0.0352466	-0.120736	-1.22402
P04075.DGADFAkWR	ALDOA	K147k	ALDOA.K147k		4.5	3.75	3	3.25	-0.247928	-1.00815	0.106915	0.0874986	0.106915	-0.478887	-0.204178	-1.33471	-0.0227251	-0.0719123	-0.181453	-0.742537	0.201711	1.43996	-0.13302	-0.769712	0.136807	0.801351	0.129161	1.51115	0.150712	0.935392	0.142504	0.861649	0.322028	3.22045	0.00368797	0.0202203
P04075.IVAPGkGILAADESTGSIAK	ALDOA	K28k	ALDOA.K28k		5.75	6.25	5.75	4.75	0.115477	0.311533	-0.263034	-0.667489	-0.263034	1.36094	-0.0996543	-1.04457	-0.0496906	-0.188593	-0.0499638	-0.184995	0.282027	2.50785	0.150746	0.922984	0.495884	7.31498	0.0506569	0.396362	0.250632	2.08258	0.0196589	0.0765115	0.222457	1.70999	0.103776	0.973403
P04075.ENLkAAQEEYVK	ALDOA	K322k	ALDOA.K322k		3.75	4.25	3.5	3	0.169925	0.148938	-0.206451	-0.443709	-0.206451	0.377724	-0.0680564	-0.272138	-0.0681365	-1.03372	8.0094e-05	0.00204254	-0.0997292	-0.516472	0.322642	3.18022	0.110821	0.595962	-0.162979	-2.21568	-0.309125	-2.99297	0.237173	1.89951	-0.0686745	-0.322465	-0.245452	-4.07853
P04075.KENLkAAQEEYVK	ALDOA	K322k	ALDOA.K322k		2.5	2.5	3.5	2			-0.736966	-1.21575	-0.736966	1.56321	0.0937841	0.188577	-0.0338003	-0.131957	0.127584	0.302763
P04075.YASIcQQnGIVPIVEPEILPDGDHDLkR	ALDOA	K200k	ALDOA.K200k		5.25	7	4.75	5.5	0.398549	1.82962	0.201634	0.39236	0.201634	1.01004	-0.101065	-1.85016	-0.141785	-1.42122	0.0407203	0.356432	0.284845	2.55146	0.128338	0.731409	0.558735	9.4814	0.0603907	0.499144	0.11117	0.606272	0.0919956	0.469621	0.258181	2.18945	0.00861506	0.0486701
NA	ALDOA	K162k	NA		NA	NA	NA	NA	NA	NA	NA	NA	NA		0.144148	1.48319	0.0652614	0.297553	0.0788864	0.501951	-0.176604	-1.17073	-0.28641	-2.57587	-0.507034	-7.66791	0.0423707	0.31602	-0.180675	-1.22981	-0.200549	-1.44777	-0.0682124	-0.319754	0.00892925	0.0505409
NA	ALDOA	K194k	NA		NA	NA	NA	NA	NA	NA	NA	NA	NA		0.144148	1.48319	0.0652614	0.297553	0.0788864	0.501951	-0.176604	-1.17073	-0.28641	-2.57587	-0.507034	-7.66791	0.0423707	0.31602	-0.180675	-1.22981	-0.200549	-1.44777	-0.0682124	-0.319754	0.00892925	0.0505409
NA	ALDOA	K207k	NA		NA	NA	NA	NA	NA	NA	NA	NA	NA		0.144148	1.48319	0.0652614	0.297553	0.0788864	0.501951	-0.176604	-1.17073	-0.28641	-2.57587	-0.507034	-7.66791	0.0423707	0.31602	-0.180675	-1.22981	-0.200549	-1.44777	-0.0682124	-0.319754	0.00892925	0.0505409
NA	ALDOA	K348k	NA		NA	NA	NA	NA	NA	NA	NA	NA	NA		0.144148	1.48319	0.0652614	0.297553	0.0788864	0.501951	-0.176604	-1.17073	-0.28641	-2.57587	-0.507034	-7.66791	0.0423707	0.31602	-0.180675	-1.22981	-0.200549	-1.44777	-0.0682124	-0.319754	0.00892925	0.0505409
P04075.VDkGVVPLAGTNGETTTQGLDGLSER	ALDOA	K111k	ALDOA.K111k		6	6	5.25	4.25			-0.289507	-0.667489	-0.289507	0.622695	0.150702	1.46129	0.0388365	0.162168	0.111865	0.502294	0.203288	1.45784	0.129015	0.736894	0.486449	7.02603	0.0286594	0.196954	-0.220281	-1.68288	0.098306	0.512999	0.105328	0.563098	-0.143141	-1.60053
P04075.kELSDIAHR	ALDOA	K14k	ALDOA.K14k		1.25	1.5	2	0.75	0.222392	0.26967	-1.16993	-0.93412	-1.16993	2.09432	0.0703553	0.836768	0.0272855	0.224511	0.0430698	0.66272	-0.240159	-1.91022	0.141735	0.843425	-0.257164	-2.14179	-0.14736	-1.87177	-0.337308	-3.50313	-0.0586563	-0.265416	-0.287026	-2.62631	-0.125198	-1.29479
P04075.AAQEEYVkR	ALDOA	K330k	ALDOA.K330k		5.25	6	4.75	4	0.184425	0.553925	-0.234465	-0.441308	-0.234465	1.38969	-0.0647385	-0.134792	-0.2877	-0.688997	0.222961	2.20015	0.075433	0.35872	0.0572783	0.254934	0.0914634	0.460317	0.00700529	0.0420188	0.0814068	0.400272	-0.146516	-0.897336	0.0614121	0.280749	0.102406	0.954401
P04075.ALQASALkAWGGK	ALDOA	K312k	ALDOA.K312k		1.5	1	2.5	0.75	-0.485427	-0.443709	-1.45943	-0.871809	-1.45943	1.32006							-0.207403	-1.50506	-0.108661	-0.580103	-0.418761	-5.18892	-0.0381012	-0.277121	-0.150355	-0.932122	0.0433522	0.185135	-0.156577	-0.989876	-0.0870326	-0.753533
P04075.SkGGVVGIK	ALDOA	K101k	ALDOA.K101k		1.25	0.75	1.75	1	-0.584963	-0.396592	-0.678072	-0.748885	-0.678072	-0.151697							0.0639228	0.218753	0.0629387	0.233301	0.23732	1.02268	-0.00283005	-0.0138869	0.392428	0.566849	0.493666	1.11484	0.532585	1.14137	-0.187916	-0.334669
P04075.GILAADESTGSIAkR	ALDOA	K42k	ALDOA.K42k		5.5	4.75	6.25	4.75	-0.201634	-0.320751	-0.378512	-0.958549	-0.378512	-0.359489							0.0190569	0.0385352	-0.0347822	-0.0475063	-0.038888	-0.0617091	0.0163752	0.0486649	0.30264	0.865248	0.0941751	0.106586	0.287014	0.415485	0.202881	0.585001
P04075.IVAPGkGILAADESTGSIAkR	ALDOA	K28k	ALDOA.K28k		0.75	0.75	0.25	0.5			0.584963	0.26967	0.584963	-0.26967							-0.20646	-1.49416	-0.0207382	-0.0802414	-0.346172	-3.61487	-0.0716635	-0.629931	0.147797	0.908874	-0.105996	-0.567965	-0.0578462	-0.26096	0.114029	1.12147
P04075.ADDGRPFPQVIkSK	ALDOA	K99k	ALDOA.K99k		4.75	6	5.5	5.5	0.321928	1.0208				1.29307							0.096977	0.476924	-0.0611963	-0.247897	0.0630268	0.262244	0.0611963	0.472519	-0.0137405	-0.0456814	0.143081	0.636724	0.00147025	0.00415922	-0.0663138	-0.408926
P04075.cQYVTEkVLAAVYK	ALDOA	K208k	ALDOA.K208k		2.25	2.75	2.5	2.5	0.263034	0.24838				-0.245189							0.0786275	0.378209	-0.00491942	-0.0178643	0.144454	0.867067	0.0322379	0.226402	0.0269424	0.107939	0.11168	0.610103	0.161419	1.036	-0.0380725	-0.255237
P09972.VDkGVVPLAGTDGETTTQGLDGLSER	ALDOC	K111k	ALDOC.K111k		7.75	8.5	8	6.5	0.129283	0.251725	-0.289507	-0.773057	-0.289507	1.06457	0.178353	1.17818	0.150609	0.861923	0.0277443	0.0663117	-0.217443	-1.62366	-0.0187763	-0.0720876	-0.342765	-3.54979	-0.0766586	-0.692038	0.126117	0.723012	-0.0150528	-0.0575112	-0.0861624	-0.430889	0.0634276	0.487513
NA	ALDOC	K108k	NA		NA	NA	NA	NA	NA	NA	NA	NA	NA		0.144148	1.48319	0.0652614	0.297553	0.0788864	0.501951	-0.176604	-1.17073	-0.28641	-2.57587	-0.507034	-7.66791	0.0423707	0.31602	-0.180675	-1.22981	-0.200549	-1.44777	-0.0682124	-0.319754	0.00892925	0.0505409
Q9BT22.AVTVYDkPASFFK	ALG1	K217k	ALG1.K217k		1.75	2	1.5	1.5	0.169925	0.204865				-0.147265							0.0061726	0.0225294	0.0550994	0.243259	0.0689392	0.320246	-0.0188792	-0.122136	-0.0400971	-0.169104	0.282618	2.55657	0.0811508	0.398648	-0.144996	-1.63411
Q5BKT4.LPPIkGPFAEFR	ALG10	K224k	ALG10.K224k		1.5	1	2.75	2	-0.485427	-0.260702	-0.415037	-0.338479	-0.415037	-0.0910182
Q9NP73.VLkALDPEIYR	ALG13	K458k	ALG13.K458k		1.25	2.25	2	1.75	0.736966	0.720981	-0.169925	-0.204865	-0.169925	1.13061							0.0635441	0.289431	0.166522	1.07065	0.158058	0.990085	-0.0397357	-0.291815	-0.203812	-1.48534	0.270469	2.36995	0.0596298	0.270801	-0.213095	-3.14675
Q9H553.VLENVEHYQELKk	ALG2	K286k	ALG2.K286k		0.25	0.25	0.75	0.75							-0.0833056	-0.668533	-0.0851902	-0.47677	0.00188462	0.038021	0.346156	3.61455	0.0996875	0.516182	0.575907	10.1553	0.0951037	0.944348	0.364941	4.05264	0.131122	0.76416	0.353595	3.8209	0.105055	0.991307
Q92685.SGSAAQAEGLckQWLQR	ALG3	K22k	ALG3.K22k		1.5	2	1.5	1.25	0.36257	0.407821	-0.222392	-0.13266	-0.222392	1.23906							-0.019448	-0.0748658	0.153346	0.94658	0.0223324	0.086956	-0.0666753	-0.570473	-0.0835943	-0.414249	0.0319	0.130316	-0.22048	-1.68535	-0.0518917	-0.375234
Q9Y673.AHLEkESIAQR	ALG5	K202k	ALG5.K202k		0.5		0.25	0.75	-1.58496	-0.740669	1	0.683964	1	-1.55271	0.024698	0.222874	0.0100879	0.0612716	0.0146102	0.0867445
Q9BVK2.VLSVIGLkLK	ALG8	K302k	ALG8.K302k		0.75		0.25	0.5	-2	-1.23906	0.584963	0.26967	0.584963	-1.39234	0.0531917	0.27423	-0.15767	-1.04226	0.210862	1.31126
Q9BVK2.SYcFTANkPDGSIR	ALG8	K223k	ALG8.K223k		3	3.25	5	3.25	0.106915	0.204865	-0.584963	-0.999297	-0.584963	1.15216	0.232229	2.20118	0.148298	1.2765	0.083931	1.63045	0.189628	1.30678	0.041703	0.175053	0.290169	2.63506	0.0570794	0.463141	0.19352	1.36856	-0.0252287	-0.100391	0.0478499	0.207883	0.098284	0.898331
Q9BVK2.LkFLDPNNIPK	ALG8	K304k	ALG8.K304k		0.25	0.25	0.25	0.75			1	0.683964	1	-0.683964							-0.0579323	-0.258471	-0.00450715	-0.0163398	-0.24293	-1.94694	-0.0206149	-0.13482	0.101673	0.536777	0.0675984	0.316163	-0.114857	-0.63422	0.0153096	0.0900275
Q9H6U8.TELSGNkAGQVWAPEGSTAFK	ALG9	K49k	ALG9.K49k		0.5	1		0.5	0.736966	0.740669	1.58496	0.740669	1.58496		-0.0442945	-0.596994	-0.0675417	-0.419312	0.0232472	0.134104	-0.201395	-1.43638	0.296107	2.73019	0.00684145	0.0250385	-0.191969	-2.94435	0.0982502	0.512608	0.129342	0.749404	0.13325	0.781975	-0.0139694	-0.0814945
Q13686.AGLQPVSkWQAYGLK	ALKBH1	K87k	ALKBH1.K87k		1.25	1	1.5	1	-0.263034	-0.204865	-0.485427	-0.740669	-0.485427	-0.233898	0.157183	0.720838	0.21722	1.13534	-0.0600373	-0.286217	0.294134	2.69836	-0.0744888	-0.353031	0.302303	2.83159	0.142239	1.76602	-0.0577746	-0.260567	-0.00864524	-0.032183	-0.0120924	-0.0456507	-0.0220738	-0.135073
Q13686.QVLATDQNFPLEPIEDEkR	ALKBH1	K362k	ALKBH1.K362k		2	2.75	2	1	0.415037	0.667218	-0.847997	-0.872978	-0.847997	1.48448	0.143434	0.796178	0.205704	0.922079	-0.0622702	-0.233742	-0.261485	-2.20302	-0.0690948	-0.32115	-0.340945	-3.51532	-0.0742367	-0.661602	-0.250753	-2.08428	-0.0667815	-0.311407	-0.22097	-1.69144	-0.0826587	-0.700441
Q13686.LYSQkPNVcNLDK	ALKBH1	K125k	ALKBH1.K125k		1.5	2.25	1.75	0.75	0.514573	1.00815	-1	-1.52259	-1	2.58862	0.0703553	0.836768	0.0272855	0.224511	0.0430698	0.66272	-0.240159	-1.91022	0.141735	0.843425	-0.257164	-2.14179	-0.14736	-1.87177	-0.337308	-3.50313	-0.0586563	-0.265416	-0.287026	-2.62631	-0.125198	-1.29479
Q13686.VIkSQLNVSSVSEQNAYR	ALKBH1	K64k	ALKBH1.K64k		2	2.5	1.5	2.5	0.289507	0.740669	0.652077	0.64267	0.652077	-0.286378							-0.0770504	-0.368541	-0.217914	-1.62936	-0.318912	-3.11444	0.0543547	0.434322	0.0960188	0.497097	-0.0404054	-0.170607	0.111468	0.608508	0.0612955	0.465909
Q6NS38.kQEEQEPTGEEPAVLGGDK	ALKBH2	K16k	ALKBH2.K16k		0.25	0.5		0.25	0.584963	0.26967	1	0.407821	1		0.0940249	1.08849	0.0722827	0.838313	0.0217423	0.388971	0.193265	1.34614	0.079562	0.383981	0.294809	2.70923	0.043874	0.330117	0.0432445	0.184599	0.0757794	0.365141	-0.020975	-0.0820643	-0.014618	-0.0856078
Q6NS38.KQEEQEPTGEEPAVLGGDkESTR	ALKBH2	K34k	ALKBH2.K34k		1.25	1	0.25	0.5	-0.263034	-0.407821	0.584963	0.26967	0.584963	-0.740669							0.251546	2.06364	-0.00707483	-0.0259171	0.33331	3.37301	0.0997931	1.01443	0.216862	1.64078	-0.0418801	-0.17784	0.316612	3.12372	0.116253	1.15496
Q96Q83.EFVFkEPQQVVR	ALKBH3	K57k	ALKBH3.K57k		0.25		0.25	0.75	-1	-0.407821	1	0.683964	1	-1.23906	-0.0642911	-0.387642	-0.0368836	-0.204782	-0.0274075	-0.147852	0.107514	0.571759	-0.0574724	-0.255983	0.217728	1.62711	0.0636626	0.535785	0.0190424	0.0739294	0.274536	2.4315	0.209217	1.54871	-0.114793	-1.13292
Q9NXW9.LkTEGFcGLPSFSR	ALKBH4	K121k	ALKBH4.K121k		0.25	0.75	1.5		1	0.683964	-2.80735	-1.23906	-2.80735	2.3897	-0.208089	-0.435512	-0.816352	-0.441013	0.608263	2.73833	0.117298	0.644613	0.257563	2.14741	0.44684	5.90338	-0.0541237	-0.431912	0.174761	1.1685	0.0623371	0.285956	0.189494	1.32425	0.0505121	0.362555
Q6P6C2.LETkSLSSSVLPPSYASDR	ALKBH5	K295k	ALKBH5.K295k		0.75	0.25	0.25	0.75	-1	-0.396592	1	0.396592	1	-0.888034	0.217933	0.96931	0.0420365	0.153162	0.175896	0.747761	0.194778	1.3627	0.0526206	0.230177	0.353238	3.75223	0.0548536	0.439545	0.0230291	0.0908411	-0.0223753	-0.0880328	0.0579305	0.261422	0.0204002	0.123617
Q8TCU4.VVINkPESAGFR	ALMS1	K2235k	ALMS1.K2235k		1.5	2.25	0.25	1.25	0.514573	0.494469	1.58496	0.888034	1.58496	-0.139899	-0.183784	-0.726898	-0.105625	-0.812928	-0.0781585	-0.647647	-0.280335	-2.48187	-0.248989	-2.0286	-0.537706	-8.70673	-0.0120955	-0.074964	-0.190819	-1.33875	-0.183592	-1.26064	-0.341972	-3.59238	-0.00324722	-0.0177558
Q8TCU4.TLLMEAENMALkR	ALMS1	K2275k	ALMS1.K2275k		0.5	0.25	0.75	1	-0.584963	-0.26967	0.321928	0.407821	0.321928	-0.855968	-0.0143885	-0.109681	-0.0200289	-0.09763	0.00564038	0.0436852	-0.12971	-0.742543	-0.0546294	-0.240763	-0.110465	-0.593336	-0.0289712	-0.199475	-0.264339	-2.27888	0.122397	0.693106	-0.0984442	-0.513966	-0.173761	-2.20452
Q8TCU4.TSSkLDSGTLDER	ALMS1	K3058k	ALMS1.K3058k		1	0.75	1.5	0.5	-0.321928	-0.407821	-1.22239	-1.30255	-1.22239	1.00815	-0.158911	-2.53978	-0.186425	-1.4032	0.0275139	0.0985939	-0.194075	-1.355	0.100184	0.519639	-0.119441	-0.66108	-0.113545	-1.23437	-0.122808	-0.69638	-0.0440263	-0.1885	0.0593763	0.269396	-0.0353966	-0.233766
Q8TCU4.LLTSkPVAQDQESLGFLGPK	ALMS1	K3105k	ALMS1.K3105k		1	2	0.75	1.5	0.847997	1.03753	0.807355	0.494469	0.807355	-0.18612	0.166527	0.944921	0.00416141	0.0182396	0.162366	0.959014	0.030606	0.123097	0.12601	0.712698	0.143867	0.861934	-0.0368133	-0.265715	0.0219701	0.0862992	0.246724	2.02846	0.122349	0.692721	-0.100982	-0.934849
Q8TCU4.TTDLSkGLQSPR	ALMS1	K2558k	ALMS1.K2558k		1.75	2.5	2	1.5	0.459432	1.00815	-0.36257	-0.740669	-0.36257	1.65419							0.0540634	0.237766	-0.0927102	-0.46862	-0.173825	-1.1427	0.0566349	0.45839	-0.0733274	-0.350203	-0.0299094	-0.121234	-0.156319	-0.987446	-0.0195077	-0.117592
NA	ALOX5	K129k	NA		NA	NA	NA	NA	NA	NA	NA	NA	NA		0.144148	1.48319	0.0652614	0.297553	0.0788864	0.501951	-0.176604	-1.17073	-0.28641	-2.57587	-0.507034	-7.66791	0.0423707	0.31602	-0.180675	-1.22981	-0.200549	-1.44777	-0.0682124	-0.319754	0.00892925	0.0505409
NA	ALOX5	K184k	NA		NA	NA	NA	NA	NA	NA	NA	NA	NA		0.144148	1.48319	0.0652614	0.297553	0.0788864	0.501951	-0.176604	-1.17073	-0.28641	-2.57587	-0.507034	-7.66791	0.0423707	0.31602	-0.180675	-1.22981	-0.200549	-1.44777	-0.0682124	-0.319754	0.00892925	0.0505409
NA	ALOX5	K442k	NA		NA	NA	NA	NA	NA	NA	NA	NA	NA		0.144148	1.48319	0.0652614	0.297553	0.0788864	0.501951	-0.176604	-1.17073	-0.28641	-2.57587	-0.507034	-7.66791	0.0423707	0.31602	-0.180675	-1.22981	-0.200549	-1.44777	-0.0682124	-0.319754	0.00892925	0.0505409
NA	ALOX5	K456k	NA		NA	NA	NA	NA	NA	NA	NA	NA	NA		0.144148	1.48319	0.0652614	0.297553	0.0788864	0.501951	-0.176604	-1.17073	-0.28641	-2.57587	-0.507034	-7.66791	0.0423707	0.31602	-0.180675	-1.22981	-0.200549	-1.44777	-0.0682124	-0.319754	0.00892925	0.0505409
NA	ALOX5	K580k	NA		NA	NA	NA	NA	NA	NA	NA	NA	NA		0.144148	1.48319	0.0652614	0.297553	0.0788864	0.501951	-0.176604	-1.17073	-0.28641	-2.57587	-0.507034	-7.66791	0.0423707	0.31602	-0.180675	-1.22981	-0.200549	-1.44777	-0.0682124	-0.319754	0.00892925	0.0505409
Q9BYJ1.FALTkTTTcVDQGDSSGNR	ALOXE3	K175k	ALOXE3.K175k		2	2.5	3.5	2.75	0.289507	0.305373	-0.321928	-0.623013	-0.321928	0.757055
Q96QP1.TLQPDDFEkLLAGVR	ALPK1	K982k	ALPK1.K982k		1.25	0.5			-1	-0.623013		NA		-1.09415	-0.267828	-0.779771	-0.0144731	-0.0401256	-0.253355	-0.672263	-0.19496	-1.36471	-0.0716863	-0.336336	-0.320868	-3.14883	-0.0475673	-0.365648	-0.0738682	-0.353478	-0.220229	-1.68224	-0.142063	-0.857776	0.0657601	0.511597
Q96QP1.TLIQEAkEMK	ALPK1	K55k	ALPK1.K55k		1.25	1.5	0.75	1	0.222392	0.171537	0.321928	0.151697	0.321928		0.0149696	0.0341462	-0.041896	-0.219943	0.0568656	0.28806	0.0613362	0.277118	0.205991	1.48877	0.2823	2.51205	-0.0558175	-0.449704	0.0675759	0.316032	-0.136223	-0.807171	0.0579437	0.261495	0.0915668	0.810447
Q86TB3.NYkLAAQEcYVQNTAR	ALPK2	K1976k	ALPK2.K1976k		0.5	0.5	0.25				-1	-0.407821	-1	-0.346609	0.0250747	0.0792788	-0.172215	-0.760623	0.19729	0.852775	0.0496736	0.214899	-0.0163738	-0.0622656	0.135696	0.79201	0.0254854	0.171773	0.0518688	0.228801	0.102039	0.539394	0.0317041	0.129416	-0.0225417	-0.138312
Q96Q42.VTAGkDSYLALVDK	ALS2	K677k	ALS2.K677k		1.75	2	0.75	1.75	0.169925	0.204865	1	1.52259	1	-0.748885	-0.201411	-0.758606	-0.040634	-0.169213	-0.160777	-1.11649	-0.227838	-1.75162	0.232084	1.80541	0.000207647	0.000739688	-0.177468	-2.56469	-0.00812972	-0.0302004	0.187732	1.30508	0.21408	1.60695	-0.0880006	-0.765522
Q96Q42.TPVLLScSkLGYISR	ALS2	K666k	ALS2.K666k		1	0.5	0.25	0.25	-0.736966	-0.328714				-0.37964
Q60I27.kGQALEEDEDTETR	ALS2CL	K739k	ALS2CL.K739k		1	1	0.5	1		NA	0.736966	0.740669	0.736966		-0.0939611	-0.41248	0.149038	0.563686	-0.242999	-1.11116	0.0923632	0.466303	0.0189021	0.072607	0.0902326	0.452176	0.0283461	0.19443	0.263034	2.25975	-0.0714737	-0.339057	0.164616	1.06702	0.150295	1.73211
Q15699.GELDELGDkcDSNVSSSK	ALX1	K122k	ALX1.K122k		1.75	2.5	2.5	2	0.459432	1.00815	-0.289507	-0.740669	-0.289507	1.64371	0.169115	1.57505	0.0650291	0.623397	0.104086	0.802893	-0.22643	-1.73398	-0.0811778	-0.394036	-0.389561	-4.51092	-0.056048	-0.452147	0.0801857	0.392548	0.00630897	0.0232629	-0.0738289	-0.35324	0.0331929	0.216505
Q15699.ASAGkcVQAFGPLPR	ALX1	K48k	ALX1.K48k		1.5	2.5	2.75	2.5	0.652077	1.30255	-0.125531	-0.26967	-0.125531	1.65419	0.394602	2.89399	0.104528	0.806815	0.290075	2.58544	0.493665	7.24625	-0.0178874	-0.0684327	0.576203	10.1672	0.197391	3.09442	0.29192	2.70507	0.170385	1.12416	0.365613	4.06662	0.0546055	0.400638
Q15699.VFQkTHYPDVYVR	ALX1	K153k	ALX1.K153k		0.5	1	1.5		0.736966	0.443709	-2.80735	-0.988311	-2.80735	1.78844							-0.166633	-1.07173	-0.167564	-1.08078	-0.323556	-3.19646	0.000359243	0.00206325	0.02796	0.112466	-0.0863681	-0.432232	-0.0237968	-0.0941563	0.0513676	0.3704
Q15699.GMQEkGELDELGDKcDSNVSSSK	ALX1	K113k	ALX1.K113k		0.75	0.75	0.5	0.25			-0.584963	-0.26967	-0.584963	-0.295831							0.00268752	0.00967113	0.225277	1.7196	0.205227	1.47998	-0.0858897	-0.813723	-0.297466	-2.79598	-0.0596448	-0.270885	-0.104253	-0.555302	-0.106853	-1.01675
Q15699.TSPcQDSSVNYGITkVEGQPLHTELNR	ALX1	K82k	ALX1.K82k		1.5	0.25	1.75	2.75	-1.80735	-1.0823	0.584963	0.552113	0.584963	-1.28637							0.0452661	0.178205	0.120906	0.528482	0.19745	1.10734	-0.0213464	-0.125408	-0.432807	-1.71659	-0.027962	-0.0759946	-0.291614	-1.22826	-0.107421	-0.538663
NA	ALYREF	K168k	NA		NA	NA	NA	NA	NA	NA	NA	NA	NA		0.144148	1.48319	0.0652614	0.297553	0.0788864	0.501951	-0.176604	-1.17073	-0.28641	-2.57587	-0.507034	-7.66791	0.0423707	0.31602	-0.180675	-1.22981	-0.200549	-1.44777	-0.0682124	-0.319754	0.00892925	0.0505409
NA	AMACR	K135k	NA		NA	NA	NA	NA	NA	NA	NA	NA	NA		0.144148	1.48319	0.0652614	0.297553	0.0788864	0.501951	-0.176604	-1.17073	-0.28641	-2.57587	-0.507034	-7.66791	0.0423707	0.31602	-0.180675	-1.22981	-0.200549	-1.44777	-0.0682124	-0.319754	0.00892925	0.0505409
Q9UHK6.PAPLLLNTPAIPSFkR	AMACR	K341k	AMACR.K341k		1.5	2	0.5	1.75	0.36257	0.443709	1.41504	1.75778	1.41504	-0.748885	-0.215108	-3.20461	-0.393974	-2.18852	0.178866	1.52206	-0.0733244	-0.34606	0.110191	0.591316	-0.136071	-0.795157	-0.0708122	-0.619603	-0.305633	-2.93312	-0.14235	-0.860293	-0.301308	-2.86001	-0.0733635	-0.593411
NA	AMBRA1	K175k	NA		NA	NA	NA	NA	NA	NA	NA	NA	NA		0.144148	1.48319	0.0652614	0.297553	0.0788864	0.501951	-0.176604	-1.17073	-0.28641	-2.57587	-0.507034	-7.66791	0.0423707	0.31602	-0.180675	-1.22981	-0.200549	-1.44777	-0.0682124	-0.319754	0.00892925	0.0505409
P17707.TVLASPQkIEGFK	AMD1	K301k	AMD1.K301k	AMD1	0.25	0.5	0.5	0.25	0.584963	0.26967	-0.584963	-0.26967	-0.584963	-0.621125	-0.106084	-0.103418	-0.107639	-0.178304	0.00155502	0.00525129	0.161577	1.0232	0.134027	0.778064	0.300237	2.79754	0.0106308	0.0652723	0.219728	1.67603	-0.00338525	-0.0123335	0.24508	2.00592	0.100245	0.924798
P17707.FVTTLFVNQSSkcR	AMD1	K291k	AMD1.K291k	AMD1	1		0.75	0.5	-2.32193	-1.03753	-0.415037	-0.171537	-0.415037	-1.09415							0.0800767	0.387173	-0.260757	-2.19265	-0.138917	-0.819241	0.131516	1.55546	0.0325017	0.12836	0.0121321	0.0454075	0.00319856	0.011263	0.00848224	0.0474373
Q96NU7.DGFIkAIGPADVIQR	AMDHD1	K51k	AMDHD1.K51k		0.75	0.25	0.5	1	-1	-0.683964	0.736966	0.740669	0.736966	-1.55271	0.0560904	0.243683	-0.129798	-0.704984	0.185889	0.999265	-0.0490887	-0.211902	-0.074773	-0.35474	0.0281131	0.111977	0.00991068	0.0605701	-0.248978	-2.05957	0.079736	0.389718	-0.0158826	-0.0608846	-0.147691	-1.68357
Q9UKV5.FLNkSSEDDAASESFLPSEGASSDPVTLR	AMFR	K600k	AMFR.K600k		0.25		1.5	1	-1	-0.407821	-0.485427	-0.305373	-0.485427		-0.185401	-1.80193	-0.0379814	-0.23761	-0.14742	-1.5989	-0.155854	-0.969614	-0.143073	-0.855022	-0.218151	-1.63222	-0.00493148	-0.0291842	-0.130712	-0.76075	-0.130187	-0.756395	-0.159862	-1.02105	-0.000235828	-0.00126587
Q86SJ2.VVFLEPLKDTAAGQnGkVR	AMIGO2	K482k	AMIGO2.K482k		1.5	0.25	0.5		-1.80735	-1.75778	-1.58496	-0.407821	-1.58496	-1.23906	0.0267772	0.457385	0.0784052	0.648217	-0.0516281	-0.511769	-0.178833	-1.19347	-0.230317	-1.78292	-0.403725	-4.83187	0.0198657	0.129314	-0.174953	-1.17046	-0.0723521	-0.344323	-0.210959	-1.56944	-0.0460987	-0.323046
Q86SJ2.VVFLEPLkDTAAGQnGK	AMIGO2	K473k	AMIGO2.K473k		1	0.75	2.5	1.75	-0.321928	-0.204865	-0.459432	-1.00815	-0.459432	-0.683964	0.0373439	0.340698	-0.0044766	-0.0322097	0.0418205	0.35958	0.371149	4.1151	0.170062	1.10528	0.530111	8.4398	0.0775929	0.703944	0.288534	2.65045	0.00788439	0.0292597	0.234928	1.86988	0.126096	1.30929
Q86SJ2.FEDAGVYScIAMNkQR	AMIGO2	K368k	AMIGO2.K368k		1.75	1.5	0.5	0.5	-0.192645	-0.26967				-0.249673							-0.082207	-0.392678	0.0987142	0.493916	0.0408255	0.16166	-0.0674368	-0.577631	0.246896	1.80681	0.0336669	0.131219	0.274594	2.1987	0.0926609	0.757787
NA	AMMECR1	K198k	NA		NA	NA	NA	NA	NA	NA	NA	NA	NA		0.144148	1.48319	0.0652614	0.297553	0.0788864	0.501951	-0.176604	-1.17073	-0.28641	-2.57587	-0.507034	-7.66791	0.0423707	0.31602	-0.180675	-1.22981	-0.200549	-1.44777	-0.0682124	-0.319754	0.00892925	0.0505409
Q9Y4X0.KGGYkAPITNEFR	AMMECR1	K281k	AMMECR1.K281k		0.75		0.75	0.25	-2	-1.23906	-1	-0.683964	-1	-0.407821	0.0243364	0.0923376	-0.0713747	-0.469871	0.0957111	0.505885	0.231705	1.00334	0.348578	1.86826	0.340774	2.45157	-0.0485437	-0.206292	0.271554	1.66334	0.122538	0.529361	0.140978	0.634151	0.0644653	0.369977
Q9Y4X0.IEFINEkGSK	AMMECR1	K247k	AMMECR1.K247k		1	1.5	2	1.75	0.485427	0.328714	-0.169925	-0.407821	-0.169925	-0.611516	0.0476325	1.11269	0.0039467	0.0480586	0.0436857	0.847176	0.202754	1.45177	0.0978388	0.503399	0.342573	3.54614	0.0404833	0.298618	-0.0906927	-0.460856	-0.0101611	-0.0380602	0.0451533	0.194161	-0.0361829	-0.240017
Q8IY45.LNLNASkGNR	AMN1	K96k	AMN1.K96k		0.25	0.5		0.5	0.584963	0.170176	1.58496	0.740669	1.58496	-0.165091	-0.183784	-0.726898	-0.105625	-0.812928	-0.0781585	-0.647647	-0.280335	-2.48187	-0.248989	-2.0286	-0.537706	-8.70673	-0.0120955	-0.074964	-0.190819	-1.33875	-0.183592	-1.26064	-0.341972	-3.59238	-0.00324722	-0.0177558
Q8IY45.AVASScSYLHEASLkR	AMN1	K123k	AMN1.K123k		0.5			0.5	-1.58496	-0.740669	1.58496	0.740669	1.58496	-1.39234	-0.518821	-0.189496	0.379164	0.331769	-0.897985	-0.63685	0.0892232	0.445543	0.0577703	0.257593	0.00686144	0.0251137	0.0121366	0.0752389	-0.0113481	-0.0392175	0.017939	0.0646342	-0.000813875	-0.00266744	-0.0128622	-0.069854
NA	AMOTL1	K195k	NA		NA	NA	NA	NA	NA	NA	NA	NA	NA		0.144148	1.48319	0.0652614	0.297553	0.0788864	0.501951	-0.176604	-1.17073	-0.28641	-2.57587	-0.507034	-7.66791	0.0423707	0.31602	-0.180675	-1.22981	-0.200549	-1.44777	-0.0682124	-0.319754	0.00892925	0.0505409
NA	AMOTL1	K246k	NA		NA	NA	NA	NA	NA	NA	NA	NA	NA		0.144148	1.48319	0.0652614	0.297553	0.0788864	0.501951	-0.176604	-1.17073	-0.28641	-2.57587	-0.507034	-7.66791	0.0423707	0.31602	-0.180675	-1.22981	-0.200549	-1.44777	-0.0682124	-0.319754	0.00892925	0.0505409
NA	AMOTL1	K289k	NA		NA	NA	NA	NA	NA	NA	NA	NA	NA		0.144148	1.48319	0.0652614	0.297553	0.0788864	0.501951	-0.176604	-1.17073	-0.28641	-2.57587	-0.507034	-7.66791	0.0423707	0.31602	-0.180675	-1.22981	-0.200549	-1.44777	-0.0682124	-0.319754	0.00892925	0.0505409
NA	AMOTL1	K316k	NA		NA	NA	NA	NA	NA	NA	NA	NA	NA		0.144148	1.48319	0.0652614	0.297553	0.0788864	0.501951	-0.176604	-1.17073	-0.28641	-2.57587	-0.507034	-7.66791	0.0423707	0.31602	-0.180675	-1.22981	-0.200549	-1.44777	-0.0682124	-0.319754	0.00892925	0.0505409
NA	AMOTL1	K551k	NA		NA	NA	NA	NA	NA	NA	NA	NA	NA		0.144148	1.48319	0.0652614	0.297553	0.0788864	0.501951	-0.176604	-1.17073	-0.28641	-2.57587	-0.507034	-7.66791	0.0423707	0.31602	-0.180675	-1.22981	-0.200549	-1.44777	-0.0682124	-0.319754	0.00892925	0.0505409
Q8IY63.LQQALTQLQSAcEkR	AMOTL1	K625k	AMOTL1.K625k		0.5	0.25	1.75		-0.584963	-0.26967	-3	-2.22284	-3	2.03279	0.127789	0.852611	0.00688523	0.036211	0.120904	0.761015
Q8IY63.VGGGPSPAQPAGkVLDPR	AMOTL1	K302k	AMOTL1.K302k				0.25	1		NA	1.32193	1.23906	1.32193		0.0453326	0.458698	-0.115737	-0.916626	0.16107	1.2429	-0.0829251	-0.405018	0.00616567	0.0225035	-0.119008	-0.657732	-0.0343771	-0.244549	-0.159824	-1.02069	-0.258787	-2.19815	-0.175723	-1.17836	0.0444639	0.308815
Q9Y2J4.LEQELkALR	AMOTL2	K519k	AMOTL2.K519k		0.5	0.25		0.75	-0.584963	-0.26967	2	1.23906	2	-1.52259	-0.0146708	-0.0414334	0.0537512	0.362203	-0.0684219	-0.712905	-0.283749	-2.53444	0.117839	0.648754	-0.215133	-1.59595	-0.154959	-2.03502	-0.132539	-0.776	0.0114736	0.0432062	-0.133127	-0.780937	-0.064705	-0.500644
Q9Y2J4.LcPQPSkGEELPTYEEAK	AMOTL2	K100k	AMOTL2.K100k		4.25	4.5	5.25	4	0.0780025	0.170176	-0.371969	-1.32006	-0.371969	1.21575	0.150852	0.627479	0.0326143	0.1183	0.118237	0.327687	0.114768	0.625408	-0.0514081	-0.223855	-0.0517015	-0.225381	0.0641216	0.54101	-0.0787317	-0.383424	0.0908543	0.46194	0.0840154	0.416961	-0.0761951	-0.62519
NA	AMOTL2	K399k	NA		NA	NA	NA	NA	NA	NA	NA	NA	NA		0.144148	1.48319	0.0652614	0.297553	0.0788864	0.501951	-0.176604	-1.17073	-0.28641	-2.57587	-0.507034	-7.66791	0.0423707	0.31602	-0.180675	-1.22981	-0.200549	-1.44777	-0.0682124	-0.319754	0.00892925	0.0505409
Q9Y2J4.LLAQSYEQQQEQEkLER	AMOTL2	K436k	AMOTL2.K436k		1.25	0.25		0.25	-1.58496	-1.52259	1	0.407821	1	-1.91062	0.155279	0.539134	-0.0567791	-0.187429	0.212058	0.976632	-0.146046	-0.881056	0.138816	0.818383	-0.129994	-0.744854	-0.109919	-1.17426	-0.192014	-1.3519	-0.0456507	-0.196673	0.0568429	0.255474	-0.0657612	-0.511609
Q9Y2J4.LASkTQEAQAGSQDMVAK	AMOTL2	K408k	AMOTL2.K408k		1.5	2	0.75	1.25	0.36257	0.199267	0.584963	0.683964	0.584963								-0.0847896	-0.416861	0.105336	0.556056	0.0401092	0.167341	-0.0733631	-0.650772	0.0352172	0.145742	-0.173987	-1.16059	-0.0332773	-0.136677	0.0939956	0.841729
Q01433.YLQQLAEkPLETR	AMPD2	K222k	AMPD2.K222k		1.5	0.5	0.75	0.5	-1.22239	-1.30255	-0.415037	-0.26967	-0.415037	-0.936141	0.135088	0.890669	0.152292	0.785047	-0.017204	-0.0428473	-0.0122918	-0.0459855	0.4516	6.03094	0.305206	2.87985	-0.179	-2.60334	0.176734	1.18878	-0.0581889	-0.262842	0.0719413	0.341856	0.105551	0.998293
Q01433.TDSDSDLQLYkEQGEGQGDR	AMPD2	K144k	AMPD2.K144k			0.5	0.5	1.25	1.58496	0.740669	1	1.00815	1	-0.26967							0.236492	1.86222	0.204505	1.47172	0.470282	6.55067	0.0123427	0.0766174	-0.0399016	-0.168153	0.184947	1.2751	0.0921197	0.470458	-0.101024	-0.935425
Q01433.FNAkYNPIGESVLR	AMPD2	K439k	AMPD2.K439k		0.75	1.5		1	0.807355	0.623013	2.32193	1.03753	2.32193	-0.196007							-0.116643	-0.63962	-0.140346	-0.83146	-0.21432	-1.58626	0.00914592	0.055622	0.000847345	0.00305501	-0.186553	-1.29235	-0.174949	-1.17043	0.0841991	0.718938
NA	AMPD3	K416k	NA		NA	NA	NA	NA	NA	NA	NA	NA	NA		0.144148	1.48319	0.0652614	0.297553	0.0788864	0.501951	-0.176604	-1.17073	-0.28641	-2.57587	-0.507034	-7.66791	0.0423707	0.31602	-0.180675	-1.22981	-0.200549	-1.44777	-0.0682124	-0.319754	0.00892925	0.0505409
NA	AMPD3	K441k	NA		NA	NA	NA	NA	NA	NA	NA	NA	NA		0.144148	1.48319	0.0652614	0.297553	0.0788864	0.501951	-0.176604	-1.17073	-0.28641	-2.57587	-0.507034	-7.66791	0.0423707	0.31602	-0.180675	-1.22981	-0.200549	-1.44777	-0.0682124	-0.319754	0.00892925	0.0505409
NA	AMPD3	K511k	NA		NA	NA	NA	NA	NA	NA	NA	NA	NA		0.144148	1.48319	0.0652614	0.297553	0.0788864	0.501951	-0.176604	-1.17073	-0.28641	-2.57587	-0.507034	-7.66791	0.0423707	0.31602	-0.180675	-1.22981	-0.200549	-1.44777	-0.0682124	-0.319754	0.00892925	0.0505409
Q86W34.TALISkNPVLVSQYEK	AMZ2	K18k	AMZ2.K18k		0.25	0.25	0.5				-1.58496	-0.740669	-1.58496	0.855968	-0.111326	-1.13933	0.00753021	0.0423925	-0.118856	-0.989325	-0.0176595	-0.0674996	0.208932	1.52281	0.214919	1.59339	-0.0874338	-0.834968	0.0971134	0.504682	-0.0831937	-0.411675	0.0671857	0.313757	0.0810121	0.68091
Q9H1A4.VNVVQYPELSDHEFIEEkENR	ANAPC1	K1066k	ANAPC1.K1066k		0.5	0.75	0.75	0.75	0.415037	0.26967				-0.177285	0.128911	1.28481	0.155586	0.794359	-0.0266747	-0.026501	-0.314105	-3.03091	0.20333	1.45831	-0.113431	-0.615367	-0.19966	-3.15859	-0.144902	-0.882897	-0.0469008	-0.203025	-0.130023	-0.755036	-0.0440321	-0.305092
Q9H1A4.QDLSkQAcEGNLPK	ANAPC1	K985k	ANAPC1.K985k		1.5	0.75	1.75	1.5	-0.807355	-1.00815	-0.192645	-0.170176	-0.192645	-0.37964	-0.0571549	-0.321225	-0.0704492	-0.310944	0.0132944	0.0525028	0.0446947	0.189757	0.167137	1.07663	0.2232	1.69388	-0.0472463	-0.362509	0.296917	2.7869	0.119675	0.671582	0.301996	2.87156	0.079635	0.664766
NA	ANAPC1	K905k	NA		NA	NA	NA	NA	NA	NA	NA	NA	NA		0.144148	1.48319	0.0652614	0.297553	0.0788864	0.501951	-0.176604	-1.17073	-0.28641	-2.57587	-0.507034	-7.66791	0.0423707	0.31602	-0.180675	-1.22981	-0.200549	-1.44777	-0.0682124	-0.319754	0.00892925	0.0505409
Q9H1A4.TQLIFGSVTNIPAkDAAPVEK	ANAPC1	K477k	ANAPC1.K477k		0.75	0.25		0.25	-1	-0.396592	1	0.407821	1	-1.10712	0.00398303	0.0320271	-0.145025	-1.02862	0.149008	1.07039	0.212464	1.56424	0.147168	0.890983	0.440701	5.74168	0.0251953	0.169515	0.235567	1.87829	0.194541	1.37993	0.299482	2.82946	0.0184328	0.110412
Q9UM13.IYTPVEESSIGkFPR	ANAPC10	K169k	ANAPC10.K169k		0.25			1.75	-1	-0.407821	3	2.22284	3	-2.3897	-0.0450409	-1.25484	-0.167155	-2.24061	0.122114	3.25726	0.397065	4.67913	0.149467	0.911485	0.601054	11.2156	0.0955394	0.950756	0.356201	3.87336	0.00721413	0.0266991	0.313327	3.06594	0.1568	1.85674
Q9UM13.SDESYTPSkISVR	ANAPC10	K93k	ANAPC10.K93k		1.75	2.75	2	3	0.584963	0.552113	0.530515	0.598228	0.530515								0.0443853	0.188223	-0.158193	-0.991347	-0.120087	-0.666078	0.0781681	0.71132	-0.141478	-0.852637	-0.0751428	-0.361241	-0.107573	-0.579526	-0.0298043	-0.190695
Q96DE5.ALFTYPkGAGEMLEDGSER	ANAPC16	K40k	ANAPC16.K40k		2.25	2.5	2.75	2.5	0.137504	0.26967	-0.125531	-0.26967	-0.125531	-0.574189	0.122569	0.732166	0.20173	0.599414	-0.0791604	-0.163943	0.12273	0.686707	0.162857	1.03539	0.293051	2.68098	-0.0154836	-0.0980513	0.126472	0.725901	-0.075173	-0.361426	0.132693	0.777292	0.0905994	0.798143
Q9UJX6.PAIEDLkYcLER	ANAPC2	K362k	ANAPC2.K362k		1.25	0.75	0.5	0.5	-0.584963	-0.311533				-0.384418	0.125416	0.175457	0.381389	1.16408	-0.255973	-0.419717	0.185243	1.26011	0.100003	0.518373	0.212044	1.55928	0.0328916	0.231904	0.343132	3.61478	0.0456811	0.196827	0.342606	3.60462	0.133645	1.43444
Q9UJX6.kGEGGTDPELEGELDSR	ANAPC2	K190k	ANAPC2.K190k		1.5	0.75	0.25	0.25	-0.807355	-1.00815				-1.10712	0.142513	2.81438	0.13863	0.989161	0.00388306	0.115231	-0.19095	-1.32101	-0.200747	-1.42907	-0.418433	-5.18095	0.00378015	0.0222034	-0.388543	-4.56318	0.18394	1.26435	-0.157517	-0.998745	-0.257217	-4.45596
Q9UJX6.NVELLkLR	ANAPC2	K546k	ANAPC2.K546k		1	0.75	1.5	1.25	-0.321928	-0.407821	-0.222392	-0.170176	-0.222392		0.29187	1.52401	0.103652	0.728584	0.188218	1.34355	0.237426	1.87438	0.0723065	0.340007	0.410028	4.97947	0.063714	0.536369	0.13627	0.807577	-0.0636907	-0.293632	0.122025	0.690144	0.0898425	0.788577
Q9UJX4.LMDALkDSDLLHWK	ANAPC5	K403k	ANAPC5.K403k		0.75	1	0.25	0.75	0.321928	0.124592	1	0.396592	1	-0.124592	-0.161896	-0.22266	0.251847	0.35139	-0.413743	-0.672061	0.203088	1.45556	-0.076378	-0.364447	0.228689	1.76233	0.107836	1.14043	0.0981902	0.512189	-0.0511363	-0.224946	0.130097	0.755651	0.0670925	0.525567
Q9UJX4.SDSYVLLEHSVKk	ANAPC5	K367k	ANAPC5.K367k		0.75	0.25	0.5	0.5	-1	-0.396592				-0.621125	0.00818726	0.0633201	0.057511	0.647673	-0.0493237	-0.503061	0.189728	1.30785	-0.0773409	-0.370315	0.185634	1.26423	0.103053	1.06461	0.160965	1.03163	0.221308	1.69564	0.155704	0.981667	-0.0271122	-0.170814
Q9UJX4.LYkLIEEScPQLANSVQIR	ANAPC5	K80k	ANAPC5.K80k		0.75	0.75		0.25			1	0.407821	1	-0.295831	0.0286204	0.200547	0.0527154	0.5123	-0.024095	-0.172561	-0.0559439	-0.247765	-0.139468	-0.823941	-0.232757	-1.81403	0.032229	0.226327	-0.235266	-1.87432	0.0600086	0.272906	-0.0401606	-0.169413	-0.132667	-1.41789
Q9UJX4.NYFAkVDcK	ANAPC5	K703k	ANAPC5.K703k		1.75	2.25	2.5	2	0.321928	0.396592	-0.289507	-0.407821	-0.289507	0.893105	0.162848	0.843865	0.186883	0.899787	-0.0240349	-0.152565	-0.244811	-1.97209	-0.101127	-0.526229	-0.420663	-5.23533	-0.0554426	-0.445742	0.0134018	0.050863	0.0610391	0.278657	-0.0936449	-0.480809	-0.0214035	-0.130459
Q9UJX4.AMFLVAkcQVASAASYDQPK	ANAPC5	K669k	ANAPC5.K669k		2	1.5	1.5	1.75	-0.36257	-0.231404	0.192645	0.13266	0.192645	-0.611516	0.299989	1.55556	0.263625	1.06699	0.0363638	0.196586	0.000915578	0.00327097	0.290752	2.64431	0.24589	1.98659	-0.111838	-1.20589	0.0943744	0.485791	-0.0437715	-0.187226	0.203745	1.48456	0.062069	0.473702
Q9UJX4.LILTGAESkSNGEEGYGR	ANAPC5	K289k	ANAPC5.K289k		12.5	12.75	13	13	0.0280144	0.0490048				-0.0461334	0.293749	1.27206	0.244623	0.804955	0.0491257	0.396783	-0.0299199	-0.120017	-0.243959	-1.96068	-0.23219	-1.80678	0.0825906	0.769193	-0.216863	-1.64079	-0.0904281	-0.459084	-0.179533	-1.21785	-0.0568073	-0.421701
Q9UJX4.NDETkALTPASLQK	ANAPC5	K229k	ANAPC5.K229k		2.25	2.5	1.75	2	0.137504	0.26967	0.169925	0.407821	0.169925		0.216956	1.44919	0.156544	1.03341	0.0604117	0.546388	0.0850922	0.418795	0.350142	3.69164	0.337948	3.45902	-0.102274	-1.0525	-0.0796866	-0.389407	0.309587	3.00093	0.183361	1.25819	-0.174901	-2.22911
Q9UJX4.cQVASAASYDQPKk	ANAPC5	K683k	ANAPC5.K683k		1	0.25			-1.32193	-1.23906		NA		-1.23906	0.218976	0.959057	-0.0728464	-0.128382	0.291822	0.677965	-0.0771535	-0.36917	-0.0473934	-0.203281	-0.152205	-0.936189	-0.0114834	-0.0708928	-0.120947	-0.681601	-0.0885533	-0.446606	-0.125347	-0.716779	-0.0145546	-0.0852043
Q9UJX4.kAEALEAAIENLNEAK	ANAPC5	K683k	ANAPC5.K683k		0.75	2		0.25	1.16993	1.32006	1	0.407821	1	-1.03938	0.0813759	1.34525	-0.017773	-0.242238	0.0991489	1.67122	0.319051	3.11687	0.123568	0.693307	0.540298	8.79935	0.0754299	0.67652	0.160491	1.02707	0.239767	1.93406	0.258171	2.18931	-0.0356188	-0.235528
Q9UJX4.QAEFFLSQQASLLkNDETK	ANAPC5	K224k	ANAPC5.K224k		2.75	2	1.75	1.25	-0.415037	-0.423011	-0.415037	-0.396592	-0.415037	-0.121058															0.0534857	0.050072	-0.0951075	-0.158654	-0.117145	-0.180366	0.0619602	0.138872
Q9UJX4.KAEALEAAIENLNEAkNYFAK	ANAPC5	K698k	ANAPC5.K698k		0.75	0.25	0.75	0.5	-1	-0.683964	-0.415037	-0.171537	-0.415037	-0.26967							-0.223773	-1.70095	-0.025326	-0.0997811	-0.156654	-0.97702	-0.0765739	-0.690964	0.0250574	0.0900639	0.031398	0.122692	0.00857347	0.0311093	-0.00422911	-0.0217738
Q9UJX4.kAVVLQAQNQMSEAHK	ANAPC5	K547k	ANAPC5.K547k		2.5	3.75	1.5	2	0.540568	0.831308	0.36257	0.305373	0.36257	-1.23906							-0.211264	-1.5501	-0.275664	-2.41097	-0.460966	-6.28765	0.0248498	0.166835	-0.0475344	-0.206264	-0.0681506	-0.319392	-0.0925274	-0.473217	0.0092629	0.052535
Q9UJX4.ALTPASLQkELnNLLK	ANAPC5	K238k	ANAPC5.K238k		4.5	4.75	1.5	2.5	0.0740006	0.13266	0.652077	0.468342	0.652077	-0.338747							-0.0770504	-0.368541	-0.217914	-1.62936	-0.318912	-3.11444	0.0543547	0.434322	0.0960188	0.497097	-0.0404054	-0.170607	0.111468	0.608508	0.0612955	0.465909
Q9UJX3.AGQERPSVTSYkEVLR	ANAPC7	K159k	ANAPC7.K159k		3.75	5.75	5.75	5.5	0.584963	2.88249	-0.0614005	-0.171537	-0.0614005	2.94305	-0.282687	-0.55378	0.0262706	0.0335991	-0.308957	-0.818311	0.00110076	0.00393551	0.128037	0.728976	0.0281533	0.112155	-0.0489804	-0.379583	-0.133138	-0.781029	-0.0614156	-0.280768	0.137467	0.817829	-0.0322249	-0.209042
Q9UJX3.TLLDkALTQRPDYIK	ANAPC7	K433k	ANAPC7.K433k		1	0.25	0.25	1.25	-1.32193	-0.423011	1.58496	0.888034	1.58496	-1.57661	-0.187226	-0.0563778	0.52365	0.356559	-0.710876	-0.178633	-0.110682	-0.594936	0.0544368	0.239742	-0.119207	-0.659272	-0.0637137	-0.536366	-0.130187	-0.671371	0.0984785	0.496622	-0.0394599	-0.154852	-0.100978	-0.869365
Q9UJX3.ALTQRPDYIkAVVK	ANAPC7	K443k	ANAPC7.K443k		2	1	2.75	2.5	-0.847997	-0.499034	-0.125531	-0.26967	-0.125531	-0.41787	0.122569	0.732166	0.20173	0.599414	-0.0791604	-0.163943	0.12273	0.686707	0.162857	1.03539	0.293051	2.68098	-0.0154836	-0.0980513	0.126472	0.725901	-0.075173	-0.361426	0.132693	0.777292	0.0905994	0.798143
Q9UJX3.AGDNkNSVLK	ANAPC7	K254k	ANAPC7.K254k		1.25	2	1.75	1.5	0.584963	0.526047	-0.192645	-0.171537	-0.192645	0.722012	-0.451057	-2.60948	-0.387053	-2.98881	-0.0640044	-0.0845462	-1.14092	-2.34903	-0.650357	-0.855113	-0.779153	-0.816604			0.181463	0.683316	0.052941	0.175478	0.0357949	0.111282	0.0386612	0.183359
Q9UJX3.NSVLkFEQAQMLDPYLIK	ANAPC7	K259k	ANAPC7.K259k		3.75	3.25	3	2.75	-0.192645	-0.396592	-0.115477	-0.0963275	-0.115477	-0.102494	-0.105851	-0.9448	-0.0864117	-0.801307	-0.0194394	-0.0806363	0.3182	3.10199	0.191348	1.32532	0.557556	9.43652	0.0489479	0.37926	0.399245	4.80791	0.136505	0.809583	0.335695	3.4726	0.118049	1.18239
Q9UJX3.INMMLANLYKk	ANAPC7	K147k	ANAPC7.K147k		1	0.75	0.75	0.75	-0.321928	-0.151697				-0.177285	0.128911	1.28481	0.155586	0.794359	-0.0266747	-0.026501	-0.314105	-3.03091	0.20333	1.45831	-0.113431	-0.615367	-0.19966	-3.15859	-0.144902	-0.882897	-0.0469008	-0.203025	-0.130023	-0.755036	-0.0440321	-0.305092
Q9UJX3.EQkYEDGIALLR	ANAPC7	K457k	ANAPC7.K457k		5.75	4.75	5.5	4.25	-0.263034	-0.888034	-0.353637	-1.11702	-0.353637	-0.139899	0.18864	1.74584	0.162064	1.58503	0.0265761	0.111533	0.082948	0.405162	0.392196	4.56953	0.467684	6.47653	-0.119328	-1.33346	0.128293	0.740774	0.196343	1.4001	0.205371	1.50348	-0.0305751	-0.196488
NA	ANAPC7	K379k	NA		NA	NA	NA	NA	NA	NA	NA	NA	NA		0.144148	1.48319	0.0652614	0.297553	0.0788864	0.501951	-0.176604	-1.17073	-0.28641	-2.57587	-0.507034	-7.66791	0.0423707	0.31602	-0.180675	-1.22981	-0.200549	-1.44777	-0.0682124	-0.319754	0.00892925	0.0505409
Q9UJX3.TSkVRPSTGnSASTPQSQcLPSEIEVK	ANAPC7	K81k	ANAPC7.K81k		3	3.25	1.75	2	0.106915	0.084929	0.169925	0.204865	0.169925		0.216956	1.44919	0.156544	1.03341	0.0604117	0.546388	0.0850922	0.418795	0.350142	3.69164	0.337948	3.45902	-0.102274	-1.0525	-0.0796866	-0.389407	0.309587	3.00093	0.183361	1.25819	-0.174901	-2.22911
Q9UJX3.AISTIcSLEKk	ANAPC7	K230k	ANAPC7.K230k		2.5	2.75	4.25	2.5	0.125531	0.171537	-0.710493	-2.40257	-0.710493	1.78738	0.12497	1.22352	0.0375576	0.231481	0.0874124	0.706406	-0.0533066	-0.233777	-0.0333392	-0.135519	-0.0654869	-0.300409	-0.00770475	-0.0464239	-0.0876789	-0.440833	-0.0182186	-0.070498	-0.000729835	-0.00263006	-0.0312085	-0.201283
Q9UJX3.NAVSkYTMALQQK	ANAPC7	K65k	ANAPC7.K65k		2.5	3.75	2.75	4.75	0.540568	0.757055	0.736966	1.13387	0.736966	-0.359489	-0.0931167	-0.708147	-0.242463	-1.28751	0.149346	0.755509	0.0790451	0.380784	0.105042	0.553952	0.284778	2.55041	-0.0100315	-0.061356	0.192245	1.35445	0.114087	0.628337	0.0543364	0.241924	0.0351168	0.231554
Q9UJX3.PSVTSYkEVLR	ANAPC7	K159k	ANAPC7.K159k		1.75	2	2.75	2	0.169925	0.204865	-0.415037	-1.23906	-0.415037	1.03753							0.0722146	0.314925	0.305436	2.68088	0.300774	2.61245	-0.0907687	-0.82704	0.268341	1.03249	0.122687	0.324166	-0.0302754	-0.0607959	0.065743	0.278017
Q9UJX3.TPkINMMLANLYK	ANAPC7	K136k	ANAPC7.K136k		2.5	3.25	2	2	0.347923	0.472736				-0.441308							0.231648	1.79985	0.102565	0.536339	0.318278	3.10335	0.0498086	0.387838	0.0200252	0.0780514	0.146676	0.898769	0.134374	0.791456	-0.0569042	-0.422638
Q5VTE6.TDSDLTQTQLkQTEVLVTAEK	ANGEL2	K430k	ANGEL2.K430k		1.75	2	0.5	1	0.169925	0.195439	0.736966	0.443709	0.736966	-0.233898	-0.235981	-2.13585	-0.18462	-1.05675	-0.0513605	-0.0520577	0.0195937	0.0754703	0.103924	0.54597	-0.00826059	-0.0304064	-0.0325401	-0.228941	0.091486	0.466185	-0.0565639	-0.253955	0.100183	0.5262	0.0665189	0.519534
Q5VTE6.VEkTDSDLTQTQLK	ANGEL2	K419k	ANGEL2.K419k		1.5	0.75			-0.807355	-1.00815		NA		-1.23906	0.218976	0.959057	-0.0728464	-0.128382	0.291822	0.677965	-0.0771535	-0.36917	-0.0473934	-0.203281	-0.152205	-0.936189	-0.0114834	-0.0708928	-0.120947	-0.681601	-0.0885533	-0.446606	-0.125347	-0.716779	-0.0145546	-0.0852043
Q5VTE6.LNYEGLPIGkVSGQEQSSR	ANGEL2	K378k	ANGEL2.K378k		3.25	3.25	4.5	3			-0.547488	-1.56321	-0.547488	0.998596							0.22973	1.69681	-0.199256	-1.3695	0.11815	0.647736	0.168898	2.22316	0.245206	1.95667	-0.265128	-2.24869	0.0816113	0.394456	0.230946	3.53612
NA	ANK1	K393k	NA		NA	NA	NA	NA	NA	NA	NA	NA	NA		0.134219	1.10669	0.242544	1.71561	-0.108324	-1.08696	-0.139177	-0.821458	-0.215533	-1.60073	-0.408132	-4.93476	0.0294631	0.203469	-0.0777437	-0.377269	0.148833	0.918256	-0.0488882	-0.213233	-0.101801	-0.94607
NA	ANK1	K413k	NA		NA	NA	NA	NA	NA	NA	NA	NA	NA		0.134219	1.10669	0.242544	1.71561	-0.108324	-1.08696	-0.139177	-0.821458	-0.215533	-1.60073	-0.408132	-4.93476	0.0294631	0.203469	-0.0777437	-0.377269	0.148833	0.918256	-0.0488882	-0.213233	-0.101801	-0.94607
NA	ANK1	K501k	NA		NA	NA	NA	NA	NA	NA	NA	NA	NA		0.176016	0.876037	0.274659	1.50483	-0.098643	-0.322159	0.0288677	0.115322	0.153259	0.945783	0.134239	0.779834	-0.0479983	-0.369878	0.259576	2.20952	-0.186349	-1.29015	0.0624475	0.28658	0.200354	2.81982
NA	ANK1	K567k	NA		NA	NA	NA	NA	NA	NA	NA	NA	NA		0.176016	0.876037	0.274659	1.50483	-0.098643	-0.322159	0.0288677	0.115322	0.153259	0.945783	0.134239	0.779834	-0.0479983	-0.369878	0.259576	2.20952	-0.186349	-1.29015	0.0624475	0.28658	0.200354	2.81982
NA	ANK1	K568k	NA		NA	NA	NA	NA	NA	NA	NA	NA	NA		0.176016	0.876037	0.274659	1.50483	-0.098643	-0.322159	0.0288677	0.115322	0.153259	0.945783	0.134239	0.779834	-0.0479983	-0.369878	0.259576	2.20952	-0.186349	-1.29015	0.0624475	0.28658	0.200354	2.81982
NA	ANK1	K578k	NA		NA	NA	NA	NA	NA	NA	NA	NA	NA		0.176016	0.876037	0.274659	1.50483	-0.098643	-0.322159	0.0288677	0.115322	0.153259	0.945783	0.134239	0.779834	-0.0479983	-0.369878	0.259576	2.20952	-0.186349	-1.29015	0.0624475	0.28658	0.200354	2.81982
NA	ANK1	K469k	NA		NA	NA	NA	NA	NA	NA	NA	NA	NA		0.255499	0.507933	0.0866737	0.220146	0.168826	0.317941	-0.189655	-1.30706	-0.081787	-0.397852	-0.3607	-3.90081	-0.0416224	-0.309081	-0.309468	-2.99887	0.0743039	0.356125	-0.23616	-1.8861	-0.172429	-2.17598
NA	ANK1	N171nK202k	NA		NA	NA	NA	NA	NA	NA	NA	NA	NA		0.144148	1.48319	0.0652614	0.297553	0.0788864	0.501951	-0.176604	-1.17073	-0.28641	-2.57587	-0.507034	-7.66791	0.0423707	0.31602	-0.180675	-1.22981	-0.200549	-1.44777	-0.0682124	-0.319754	0.00892925	0.0505409
NA	ANK1	K301k	NA		NA	NA	NA	NA	NA	NA	NA	NA	NA		0.144148	1.48319	0.0652614	0.297553	0.0788864	0.501951	-0.176604	-1.17073	-0.28641	-2.57587	-0.507034	-7.66791	0.0423707	0.31602	-0.180675	-1.22981	-0.200549	-1.44777	-0.0682124	-0.319754	0.00892925	0.0505409
NA	ANK1	K336k	NA		NA	NA	NA	NA	NA	NA	NA	NA	NA								-0.196731	-1.38424	-0.104933	-0.553171	-0.291957	-2.6635	-0.0354218	-0.253559	-0.17352	-1.15584	-0.16164	-1.03812	-0.233761	-1.85459	-0.00533802	-0.0295634
NA	ANK1	K699k	NA		NA	NA	NA	NA	NA	NA	NA	NA	NA								-0.100279	-0.520297	-0.146203	-0.882441	-0.334559	-3.39605	0.0177206	0.113811	-0.1097	-0.595281	-0.0961908	-0.498286	-0.081405	-0.40026	-0.00606978	-0.0337661
NA	ANK1	K722k	NA		NA	NA	NA	NA	NA	NA	NA	NA	NA								-0.100279	-0.520297	-0.146203	-0.882441	-0.334559	-3.39605	0.0177206	0.113811	-0.1097	-0.595281	-0.0961908	-0.498286	-0.081405	-0.40026	-0.00606978	-0.0337661
NA	ANK1	K751k	NA		NA	NA	NA	NA	NA	NA	NA	NA	NA								0.108017	0.575416	0.0681678	0.315777	0.0480967	0.206845	0.0153766	0.0973073	0.0299052	0.117082	-0.104372	-0.542932	-0.108102	-0.566513	0.0610573	0.44751
NA	ANK1	K765k	NA		NA	NA	NA	NA	NA	NA	NA	NA	NA								-0.151703	-0.931639	0.233318	1.82122	-0.161693	-1.0243	-0.148567	-1.89718	-0.0533468	-0.236636	-0.0457945	-0.197401	-0.0425399	-0.181101	-0.00339325	-0.0185709
NA	ANK1	K808k	NA		NA	NA	NA	NA	NA	NA	NA	NA	NA								-0.151703	-0.931639	0.233318	1.82122	-0.161693	-1.0243	-0.148567	-1.89718	-0.0533468	-0.236636	-0.0457945	-0.197401	-0.0425399	-0.181101	-0.00339325	-0.0185709
NA	ANK1	K834k	NA		NA	NA	NA	NA	NA	NA	NA	NA	NA								-0.151703	-0.931639	0.233318	1.82122	-0.161693	-1.0243	-0.148567	-1.89718	-0.0533468	-0.236636	-0.0457945	-0.197401	-0.0425399	-0.181101	-0.00339325	-0.0185709
NA	ANK1	K890k	NA		NA	NA	NA	NA	NA	NA	NA	NA	NA								-0.0216846	-0.0842177	-0.127128	-0.721657	-0.269623	-2.32106	0.0406872	0.300482	-0.0717026	-0.340426	-0.0825535	-0.407576	-0.0471431	-0.204262	0.00487532	0.0269248
NA	ANK1	K999k	NA		NA	NA	NA	NA	NA	NA	NA	NA	NA								-0.0216846	-0.0842177	-0.127128	-0.721657	-0.269623	-2.32106	0.0406872	0.300482	-0.0717026	-0.340426	-0.0825535	-0.407576	-0.0471431	-0.204262	0.00487532	0.0269248
NA	ANK1	K1125k	NA		NA	NA	NA	NA	NA	NA	NA	NA	NA								-0.0216846	-0.0842177	-0.127128	-0.721657	-0.269623	-2.32106	0.0406872	0.300482	-0.0717026	-0.340426	-0.0825535	-0.407576	-0.0471431	-0.204262	0.00487532	0.0269248
NA	ANK1	K1143k	NA		NA	NA	NA	NA	NA	NA	NA	NA	NA								-0.0216846	-0.0842177	-0.127128	-0.721657	-0.269623	-2.32106	0.0406872	0.300482	-0.0717026	-0.340426	-0.0825535	-0.407576	-0.0471431	-0.204262	0.00487532	0.0269248
NA	ANK1	K1389k	NA		NA	NA	NA	NA	NA	NA	NA	NA	NA								-0.0216846	-0.0842177	-0.127128	-0.721657	-0.269623	-2.32106	0.0406872	0.300482	-0.0717026	-0.340426	-0.0825535	-0.407576	-0.0471431	-0.204262	0.00487532	0.0269248
NA	ANK3	K1417k	NA		NA	NA	NA	NA	NA	NA	NA	NA	NA		0.107854	0.596639	-0.0994747	-0.346536	0.207328	1.04854	0.303657	2.85405	-0.0201357	-0.0777245	0.344903	3.59055	0.124941	1.43344	0.106574	0.57219	-0.109375	-0.592865	0.00609262	0.0224453	0.097026	0.881545
NA	ANK3	K478k	NA		NA	NA	NA	NA	NA	NA	NA	NA	NA								-0.0216846	-0.0842177	-0.127128	-0.721657	-0.269623	-2.32106	0.0406872	0.300482	-0.0717026	-0.340426	-0.0825535	-0.407576	-0.0471431	-0.204262	0.00487532	0.0269248
Q9NU02.LDTVkYLLDIGAK	ANKEF1	K608k	ANKEF1.K608k		1	0.75	0.5	0.5	-0.321928	-0.204865				-0.26967	0.255395	0.271998	0.202924	0.352308	0.0524715	0.0726649	0.412747	5.04405	0.144795	0.870053	0.528764	8.39313	0.103394	1.06992	0.0348719	0.144119	0.0282312	0.113679	0.131319	0.7658	0.00298365	0.0162884
Q9NU02.IAnkLAR	ANKEF1	K312k	ANKEF1.K312k		0.75	0.25	0.25	0.5	-1	-0.396592	0.584963	0.170176	0.584963	-0.611516	0.155234	1.18452	0.130497	0.574116	0.0247362	0.12702	-0.0720814	-0.338673	0.0194388	0.0748278	-0.156618	-0.976687	-0.0353146	-0.25263	-0.257214	-2.17558	0.0744247	0.35686	-0.172762	-1.14813	-0.149005	-1.70798
Q9NU02.DVcLTFLEkGANPNAINSSTGR	ANKEF1	K173k	ANKEF1.K173k		0.75			0.25	-2	-1.23906	1	0.407821	1	-1.55271	0.169488	0.727672	0.0856127	0.252236	0.0838757	0.429397	-0.243383	-1.95297	0.269028	2.31231	-0.00811763	-0.0298629	-0.197722	-3.10372	0.011759	0.0443323	-0.0704113	-0.332726	-0.0687574	-0.322952	0.0369192	0.245914
Q9NU02.GGGVNINEFFkGTR	ANKEF1	K397k	ANKEF1.K397k		1.25	1.5			0.222392	0.26967		NA		-0.346609	0.129308	0.835172	0.00414792	0.0216159	0.12516	0.845656	0.289485	2.62423	-0.0727091	-0.342397	0.358201	3.85064	0.139759	1.71602	0.14795	0.910257	-0.0600708	-0.273252	-0.0137482	-0.0522506	0.093464	0.834835
Q9NU02.AFESGIPVDMKDNYYk	ANKEF1	K526k	ANKEF1.K526k		1.25	1.5	1.5	1	0.222392	0.171537	-0.485427	-0.443709	-0.485427	0.72205	0.200304	1.74631	0.102453	0.561947	0.0978514	1.14166	-0.205761	-1.48612	-0.0713941	-0.334612	-0.350679	-3.70211	-0.0518478	-0.408443	-0.293973	-2.73852	0.104212	0.55501	-0.0373688	-0.155944	-0.178905	-2.31672
Q9P2R3.ESGAAEQVDNkGR	ANKFY1	K870k	ANKFY1.K870k				0.5	0.5		NA					-0.0833056	-0.668533	-0.0851902	-0.47677	0.00188462	0.038021	0.346156	3.61455	0.0996875	0.516182	0.575907	10.1553	0.0951037	0.944348	0.364941	4.05264	0.131122	0.76416	0.353595	3.8209	0.105055	0.991307
Q9P2R3.ADVDMVDkSGWSLLHK	ANKFY1	K287k	ANKFY1.K287k		1	0.25	0.25	0.5	-1.32193	-0.748885	0.584963	0.26967	0.584963	-1.39347	0.0991922	0.512177	0.00238122	0.00812035	0.096811	0.452546	0.269167	2.31434	0.0107816	0.0400917	0.337938	3.45884	0.099702	1.01305	0.208499	1.54021	0.0354332	0.146759	0.117232	0.652518	0.0777584	0.643043
Q9P2R3.NLLLAGAkVNELTK	ANKFY1	K931k	ANKFY1.K931k		1.25	0.75	0.5	1.25	-0.584963	-0.683964	1	1.00815	1	-1.91062	0.155279	0.539134	-0.0567791	-0.187429	0.212058	0.976632	-0.146046	-0.881056	0.138816	0.818383	-0.129994	-0.744854	-0.109919	-1.17426	-0.192014	-1.3519	-0.0456507	-0.196673	0.0568429	0.255474	-0.0657612	-0.511609
NA	ANKFY1	K254k	NA		NA	NA	NA	NA	NA	NA	NA	NA	NA		0.107854	0.596639	-0.0994747	-0.346536	0.207328	1.04854	0.303657	2.85405	-0.0201357	-0.0777245	0.344903	3.59055	0.124941	1.43344	0.106574	0.57219	-0.109375	-0.592865	0.00609262	0.0224453	0.097026	0.881545
NA	ANKFY1	K678k	NA		NA	NA	NA	NA	NA	NA	NA	NA	NA		0.107854	0.596639	-0.0994747	-0.346536	0.207328	1.04854	0.303657	2.85405	-0.0201357	-0.0777245	0.344903	3.59055	0.124941	1.43344	0.106574	0.57219	-0.109375	-0.592865	0.00609262	0.0224453	0.097026	0.881545
Q9P2R3.SAEAILkR	ANKFY1	K858k	ANKFY1.K858k		1.5	2	2	1	0.36257	0.443709	-0.847997	-0.872978	-0.847997	1.38969	0.143454	0.656689	-0.0213598	-0.112862	0.164813	2.3563	-0.258891	-2.16614	-0.134174	-0.779295	-0.363658	-3.96071	-0.0481237	-0.371112	-0.298796	-2.81804	-0.032273	-0.132032	-0.205688	-1.50718	-0.119749	-1.20863
Q9P2R3.NNkSAEAILK	ANKFY1	K851k	ANKFY1.K851k		1	1	1.5	2			0.36257	0.328714	0.36257	-0.377006							0.243458	1.95398	0.163478	1.04132	0.30718	2.91297	0.0308615	0.214942	0.204311	1.49114	0.0377689	0.157858	0.13375	0.78618	0.0748275	0.609752
Q8IWZ3.VLLDkGADVNAPPVPSSR	ANKHD1	K1279k	ANKHD1.K1279k		1	1	0.5	2			1.58496	1.21575	1.58496	-1.38969	-0.518821	-0.189496	0.379164	0.331769	-0.897985	-0.63685	0.0892232	0.445543	0.0577703	0.257593	0.00686144	0.0251137	0.0121366	0.0752389	-0.0113481	-0.0392175	0.017939	0.0646342	-0.000813875	-0.00266744	-0.0128622	-0.069854
NA	ANKHD1	K1830k	NA		NA	NA	NA	NA	NA	NA	NA	NA	NA		-0.0540887	-0.625671	-0.0665522	-1.10153	0.0124634	0.298538	0.407951	4.93049	0.124845	0.703417	0.587341	10.6261	0.109241	1.16319	0.256958	2.17192	-0.0499478	-0.218732	0.199999	1.44149	0.137893	1.50754
NA	ANKHD1	K1833k	NA		NA	NA	NA	NA	NA	NA	NA	NA	NA		-0.0540887	-0.625671	-0.0665522	-1.10153	0.0124634	0.298538	0.407951	4.93049	0.124845	0.703417	0.587341	10.6261	0.109241	1.16319	0.256958	2.17192	-0.0499478	-0.218732	0.199999	1.44149	0.137893	1.50754
Q8IWZ3.LSTADGkAFADPEVLR	ANKHD1	K164k	ANKHD1.K164k		1.75	1.5	1.75	2	-0.192645	-0.26967	0.169925	0.195439	0.169925	-0.740669	0.216956	1.44919	0.156544	1.03341	0.0604117	0.546388	0.0850922	0.418795	0.350142	3.69164	0.337948	3.45902	-0.102274	-1.0525	-0.0796866	-0.389407	0.309587	3.00093	0.183361	1.25819	-0.174901	-2.22911
NA	ANKHD1	K164k	NA		NA	NA	NA	NA	NA	NA	NA	NA	NA		0.107854	0.596639	-0.0994747	-0.346536	0.207328	1.04854	0.303657	2.85405	-0.0201357	-0.0777245	0.344903	3.59055	0.124941	1.43344	0.106574	0.57219	-0.109375	-0.592865	0.00609262	0.0224453	0.097026	0.881545
NA	ANKHD1	K1643k	NA		NA	NA	NA	NA	NA	NA	NA	NA	NA		0.107854	0.596639	-0.0994747	-0.346536	0.207328	1.04854	0.303657	2.85405	-0.0201357	-0.0777245	0.344903	3.59055	0.124941	1.43344	0.106574	0.57219	-0.109375	-0.592865	0.00609262	0.0224453	0.097026	0.881545
Q9P2G1.AFVENNPAIkWcPTPGcDR	ANKIB1	K420k	ANKIB1.K420k		0.5	0.25		0.75	-0.584963	-0.26967	2	1.23906	2	-1.52259	-0.0146708	-0.0414334	0.0537512	0.362203	-0.0684219	-0.712905	-0.283749	-2.53444	0.117839	0.648754	-0.215133	-1.59595	-0.154959	-2.03502	-0.132539	-0.776	0.0114736	0.0432062	-0.133127	-0.780937	-0.064705	-0.500644
Q9P2G1.IIkAAcLVQQK	ANKIB1	K712k	ANKIB1.K712k		0.75	1	2	1.25	0.321928	0.14814	-0.584963	-1.23906	-0.584963	0.731281	-0.119987	-0.804084	0.028218	0.0579355	-0.148205	-0.360974	-0.222917	-1.69038	0.186384	1.27217	-0.0725318	-0.341343	-0.157935	-2.10104	-0.18344	-1.25903	0.0238987	0.0945975	-0.0717523	-0.340724	-0.0931575	-0.830873
Q9P2G1.DGNPNkR	ANKIB1	K74k	ANKIB1.K74k		0.25	0.25	0.25	0.25							-0.0833056	-0.668533	-0.0851902	-0.47677	0.00188462	0.038021	0.346156	3.61455	0.0996875	0.516182	0.575907	10.1553	0.0951037	0.944348	0.364941	4.05264	0.131122	0.76416	0.353595	3.8209	0.105055	0.991307
NA	ANKIB1	K127k	NA		NA	NA	NA	NA	NA	NA	NA	NA	NA		-0.0540887	-0.625671	-0.0665522	-1.10153	0.0124634	0.298538	0.407951	4.93049	0.124845	0.703417	0.587341	10.6261	0.109241	1.16319	0.256958	2.17192	-0.0499478	-0.218732	0.199999	1.44149	0.137893	1.50754
NA	ANKIB1	K166k	NA		NA	NA	NA	NA	NA	NA	NA	NA	NA		-0.0540887	-0.625671	-0.0665522	-1.10153	0.0124634	0.298538	0.407951	4.93049	0.124845	0.703417	0.587341	10.6261	0.109241	1.16319	0.256958	2.17192	-0.0499478	-0.218732	0.199999	1.44149	0.137893	1.50754
NA	ANKIB1	K435k	NA		NA	NA	NA	NA	NA	NA	NA	NA	NA		-0.0540887	-0.625671	-0.0665522	-1.10153	0.0124634	0.298538	0.407951	4.93049	0.124845	0.703417	0.587341	10.6261	0.109241	1.16319	0.256958	2.17192	-0.0499478	-0.218732	0.199999	1.44149	0.137893	1.50754
NA	ANKIB1	K528k	NA		NA	NA	NA	NA	NA	NA	NA	NA	NA		-0.0540887	-0.625671	-0.0665522	-1.10153	0.0124634	0.298538	0.407951	4.93049	0.124845	0.703417	0.587341	10.6261	0.109241	1.16319	0.256958	2.17192	-0.0499478	-0.218732	0.199999	1.44149	0.137893	1.50754
Q9P2G1.DPEAEEIEAEYAALDkR	ANKIB1	K221k	ANKIB1.K221k		0.75			1	-2	-0.667218	2.32193	1.88194	2.32193		0.0944406	0.60049	0.0233538	0.0581284	0.0710868	0.407979	0.187697	1.28612	-0.00159502	-0.00571418	0.208466	1.51739	0.0730415	0.646805	-0.154509	-0.97049	0.0833951	0.412969	-0.0570917	-0.256831	-0.10689	-1.01728
Q9P2G1.ILkcSYPYGFFLEPK	ANKIB1	K661k	ANKIB1.K661k		1.5	1.5	0.75	1.25			0.584963	0.396592	0.584963	-0.384418	0.151774	0.576547	0.0905975	0.328977	0.0611768	0.525138	-0.00433028	-0.0156873	-0.185893	-1.26697	-0.153957	-0.952165	0.070059	0.610528	-0.219081	-1.66804	-0.175232	-1.17332	-0.167705	-1.09742	-0.0197015	-0.118895
NA	ANKIB1	K539k	NA		NA	NA	NA	NA	NA	NA	NA	NA	NA								0.128894	0.73591	-0.252902	-2.08235	-0.0285138	-0.113751	0.147322	1.87097	-0.105396	-0.563595	-0.114885	-0.63444	-0.236387	-1.8891	0.00426348	0.0234581
NA	ANKIB1	K634k	NA		NA	NA	NA	NA	NA	NA	NA	NA	NA								0.128894	0.73591	-0.252902	-2.08235	-0.0285138	-0.113751	0.147322	1.87097	-0.105396	-0.563595	-0.114885	-0.63444	-0.236387	-1.8891	0.00426348	0.0234581
Q86XL3.AGATASkEPPLYYGVcPVYEDVPAR	ANKLE2	K194k	ANKLE2.K194k		2.25	2.25	2.75	2.75							-0.0587387	-0.207495	0.0723977	1.05897	-0.131136	-0.596451	-0.163974	-1.04607	0.124118	0.697645	0.0220685	0.0858391	-0.111165	-1.19474	0.0839049	0.416248	-0.0134054	-0.0508774	0.0645311	0.298431	0.0437216	0.302424
Q86XL3.AFLDEDDMSLEEIkNR	ANKLE2	K652k	ANKLE2.K652k		0.5	1	1.5	1.75	0.736966	0.328714	0.192645	0.26967	0.192645	-0.204865	-0.239655	-2.29663	-0.241248	-2.00203	0.00159329	0.275747	0.363385	3.95516	0.0450551	0.19155	0.479571	6.8208	0.122833	1.39544	0.346052	3.67159	0.0925372	0.473283	0.24055	1.94457	0.113904	1.1196
Q86XL3.TSLPLsPVkTAPLFSNDR	ANKLE2	K271k	ANKLE2.K271k		0.75	1	0.75	1.75	0.321928	0.14814	1	0.888034	1	-0.447114	0.19408	1.74105	0.149154	1.75528	0.0449259	0.364587	-0.102937	-0.538972	-0.183094	-1.23756	-0.351186	-3.712	0.0309297	0.215506	0.0230136	0.0907743	-0.133813	-0.786714	-0.102966	-0.546026	0.0704622	0.561591
Q86XL3.AGLkcGPITSTTR	ANKLE2	K90k	ANKLE2.K90k		1.75	2.25	2.5	2	0.321928	0.683964	-0.289507	-0.740669	-0.289507	1.55271	0.169115	1.57505	0.0650291	0.623397	0.104086	0.802893	-0.22643	-1.73398	-0.0811778	-0.394036	-0.389561	-4.51092	-0.056048	-0.452147	0.0801857	0.392548	0.00630897	0.0232629	-0.0738289	-0.35324	0.0331929	0.216505
Q86XL3.GIcDYFPSPSkTSLPLsPVK	ANKLE2	K262k	ANKLE2.K262k		1.25	0.75	0.5	0.25	-0.584963	-0.311533	-0.584963	-0.26967	-0.584963	-0.177285							-0.218694	-1.63879	-0.0703952	-0.32874	-0.245712	-1.9842	-0.0572236	-0.464687	-0.146105	-0.893644	-0.0393998	-0.165716	-0.00178772	-0.00647048	-0.0479426	-0.339359
Q86XL3.NSVAGSNPAkPGLGSPGR	ANKLE2	K909k	ANKLE2.K909k		0.5	1	0.25	0.5	0.736966	0.260702	0.584963	0.26967	0.584963	-0.11922							-0.367889	-4.04745	-0.0932013	-0.471907	-0.425574	-5.35646	-0.105993	-1.1109	-0.197671	-1.41506	-0.216179	-1.63244	-0.13444	-0.792012	0.00831578	0.0468945
Q86XL3.LkLLNPDDLREEIVK	ANKLE2	K73k	ANKLE2.K73k			0.5	0.5	0.5	1.58496	0.740669				-0.368929							-0.231121	-1.79314	-0.0730875	-0.344648	-0.367488	-4.03917	-0.0609798	-0.505662	-0.182055	-1.24435	-0.0592803	-0.268864	-0.179331	-1.21574	-0.0551629	-0.405931
Q9H9E1.FVkSLNEEDSK	ANKRA2	K70k	ANKRA2.K70k		0.25	0.25	0.75	1			0.321928	0.407821	0.321928	-0.407821	0.0659307	0.310089	0.0918935	0.500216	-0.0259629	-0.108919	0.264261	2.24289	0.0334837	0.136183	0.311342	2.98351	0.0890491	0.857468	0.229448	1.79865	-0.151977	-0.947019	0.169197	1.11226	0.171374	2.15354
Q15327.FLSDkNNPDVcDEYKR	ANKRD1	K143k	ANKRD1.K143k		0.5	0.5	0.5	0.25			-0.584963	-0.26967	-0.584963	-0.26967	-0.102756	-0.856009	-0.060917	-0.421747	-0.0418389	-0.292454	-0.201241	-1.43465	0.146795	0.887673	-0.0979649	-0.504267	-0.134295	-1.60864	-0.177198	-1.19357	-0.0855955	-0.427194	-0.218632	-1.6625	-0.0411572	-0.280688
Q15327.VPVVkEPEPEIITEPVDVPTFLK	ANKRD1	K108k	ANKRD1.K108k		0.5	0.75	0.25	0.75	0.415037	0.171537	1	0.396592	1	-0.139899	-0.078181	-1.29597	-0.100066	-1.10454	0.021885	0.168349	0.228669	1.76207	0.0773863	0.370592	0.400438	4.75607	0.0583747	0.477096	0.119604	0.671024	0.0726231	0.345953	0.341635	3.58588	0.0211086	0.128441
NA	ANKRD11	K749k	NA		NA	NA	NA	NA	NA	NA	NA	NA	NA								0.128894	0.73591	-0.252902	-2.08235	-0.0285138	-0.113751	0.147322	1.87097	-0.105396	-0.563595	-0.114885	-0.63444	-0.236387	-1.8891	0.00426348	0.0234581
Q8IZ07.QLEkELQGQNVEAVDPR	ANKRD13A	K27k	ANKRD13A.K27k		1.5	2.5	1.75	1	0.652077	1.30255	-0.678072	-0.441308	-0.678072	1.81712	0.110794	1.03476	0.14448	1.74641	-0.033686	-0.532543	0.106118	0.561672	0.0865869	0.4284	0.0947464	0.482309	0.00753636	0.0453599	0.0724433	0.344871	-0.0579774	-0.26168	-0.00184532	-0.00668054	0.0585981	0.439135
NA	ANKRD13A	K69k	NA		NA	NA	NA	NA	NA	NA	NA	NA	NA		-0.108555	-0.534289	-0.0716609	-0.19305	-0.036894	-0.336688									-0.157023	-0.99408	0.274302	2.42793	0.0386716	0.162197	-0.193794	-2.65979
NA	ANKRD13A	K179k	NA		NA	NA	NA	NA	NA	NA	NA	NA	NA		-0.108555	-0.534289	-0.0716609	-0.19305	-0.036894	-0.336688									-0.157023	-0.99408	0.274302	2.42793	0.0386716	0.162197	-0.193794	-2.65979
NA	ANKRD13A	K195k	NA		NA	NA	NA	NA	NA	NA	NA	NA	NA		-0.108555	-0.534289	-0.0716609	-0.19305	-0.036894	-0.336688									-0.157023	-0.99408	0.274302	2.42793	0.0386716	0.162197	-0.193794	-2.65979
NA	ANKRD13A	K247k	NA		NA	NA	NA	NA	NA	NA	NA	NA	NA		-0.108555	-0.534289	-0.0716609	-0.19305	-0.036894	-0.336688									-0.157023	-0.99408	0.274302	2.42793	0.0386716	0.162197	-0.193794	-2.65979
NA	ANKRD13A	K279k	NA		NA	NA	NA	NA	NA	NA	NA	NA	NA		-0.0176728	-0.157633	-0.0485297	-0.206335	0.030857	0.166377	0.0807566	0.391406	0.156575	0.976294	0.164487	1.051	-0.0292559	-0.201784	-0.109246	-0.5919	0.0327599	0.13428	-0.071928	-0.341777	-0.0638032	-0.491359
NA	ANKRD13A	K400k	NA		NA	NA	NA	NA	NA	NA	NA	NA	NA		-0.0176728	-0.157633	-0.0485297	-0.206335	0.030857	0.166377	0.0807566	0.391406	0.156575	0.976294	0.164487	1.051	-0.0292559	-0.201784	-0.109246	-0.5919	0.0327599	0.13428	-0.071928	-0.341777	-0.0638032	-0.491359
NA	ANKRD13A	K410k	NA		NA	NA	NA	NA	NA	NA	NA	NA	NA		-0.0176728	-0.157633	-0.0485297	-0.206335	0.030857	0.166377	0.0807566	0.391406	0.156575	0.976294	0.164487	1.051	-0.0292559	-0.201784	-0.109246	-0.5919	0.0327599	0.13428	-0.071928	-0.341777	-0.0638032	-0.491359
Q8IZ07.LTSPVINTSLDTkNIAFER	ANKRD13A	K239k	ANKRD13A.K239k		1.5	0.75	1.75	1.25	-0.807355	-0.611516	-0.415037	-0.396592	-0.415037	-0.295831							0.063782	0.170621	0.103498	0.254589	0.227056	0.820827	-0.00543935	-0.019886	0.376654	0.821846	-0.240558	-0.820865	0.0319609	0.0712907	0.24063	1.2137
Q8IZ07.LTLDLmkPK	ANKRD13A	K217k	ANKRD13A.K217k		1	1	3	2.5			-0.241008	-0.443709	-0.241008	-0.443709							0.112514	0.527767	-0.0944116	-0.387314	0.0453752	0.157855	0.0800449	0.611825	-0.0591866	-0.156857	0.12929	0.353031	0.115629	0.238507	-0.0769865	-0.338036
NA	ANKRD13A	K257k	NA		NA	NA	NA	NA	NA	NA	NA	NA	NA								0.1826	1.17655	0.230595	1.59198	0.388953	4.21586	-0.0120096	-0.0700775
Q86YJ7.LAGIPVLLEkLR	ANKRD13B	K122k	ANKRD13B.K122k		0.75	0.25			-1	-0.683964		NA		-0.855968	-0.150626	-1.70025	-0.123199	-1.07225	-0.0274273	-0.0774109	0.124635	0.701747	0.272195	2.3591	0.441439	5.76095	-0.0569382	-0.46163	0.175591	1.17701	-0.0669599	-0.312444	0.0561243	0.251567	0.108978	1.04722
Q8N6S4.VkNAQGWSPLAEAISYGDR	ANKRD13C	K173k	ANKRD13C.K173k		0.5	0.5		0.25			1	0.407821	1	-0.170176	-0.0192306	-0.126251	-0.168719	-0.867043	0.149488	0.762293	0.306734	2.90547	0.158728	0.996347	0.54949	9.13419	0.0571106	0.463475	0.278544	2.49306	0.121252	0.684017	0.327557	3.32104	0.070671	0.563857
NA	ANKRD13D	K138k	NA		NA	NA	NA	NA	NA	NA	NA	NA	NA		-0.00906874	-0.0497329	-0.0058163	-0.0339081	-0.00325244	-0.0151491	0.11211	0.605514	-0.0135393	-0.0509069	0.149424	0.911099	0.0484839	0.374665	-0.0512103	-0.225335	0.0423411	0.180117	0.0297601	0.120558	-0.0420327	-0.288049
NA	ANKRD13D	K409k	NA		NA	NA	NA	NA	NA	NA	NA	NA	NA		-0.00906874	-0.0497329	-0.0058163	-0.0339081	-0.00325244	-0.0151491	0.11211	0.605514	-0.0135393	-0.0509069	0.149424	0.911099	0.0484839	0.374665	-0.0512103	-0.225335	0.0423411	0.180117	0.0297601	0.120558	-0.0420327	-0.288049
Q8IVF6.YSQQLNDLkAENAR	ANKRD18A	K395k	ANKRD18A.K395k		0.5	0.25	0.5	0.5	-0.584963	-0.26967				-0.26967	0.255395	0.271998	0.202924	0.352308	0.0524715	0.0726649	0.412747	5.04405	0.144795	0.870053	0.528764	8.39313	0.103394	1.06992	0.0348719	0.144119	0.0282312	0.113679	0.131319	0.7658	0.00298365	0.0162884
Q9UPS8.YIGkQESVEER	ANKRD26	K1128k	ANKRD26.K1128k			0.5	0.5	0.25	1.58496	0.740669	-0.584963	-0.26967	-0.584963	1.00815	-0.239576	-1.5398	-0.219722	-0.991597	-0.019854	-0.111329	0.304974	2.87598	0.0688826	0.319917	0.444915	5.85233	0.0910996	0.886441	0.347168	3.2944	0.0875718	0.3356	0.256488	1.81695	0.157523	1.40606
NA	ANKRD27	K10k	NA		NA	NA	NA	NA	NA	NA	NA	NA	NA		-0.00906874	-0.0497329	-0.0058163	-0.0339081	-0.00325244	-0.0151491	0.11211	0.605514	-0.0135393	-0.0509069	0.149424	0.911099	0.0484839	0.374665	-0.0512103	-0.225335	0.0423411	0.180117	0.0297601	0.120558	-0.0420327	-0.288049
NA	ANKRD27	K241k	NA		NA	NA	NA	NA	NA	NA	NA	NA	NA		-0.00906874	-0.0497329	-0.0058163	-0.0339081	-0.00325244	-0.0151491	0.11211	0.605514	-0.0135393	-0.0509069	0.149424	0.911099	0.0484839	0.374665	-0.0512103	-0.225335	0.0423411	0.180117	0.0297601	0.120558	-0.0420327	-0.288049
NA	ANKRD27	K370k	NA		NA	NA	NA	NA	NA	NA	NA	NA	NA		-0.387393	-0.848728	-0.622117	-1.56613	0.234724	0.320174	0.0189984	0.0730048	0.0507038	0.220206	0.103219	0.540966	-0.012234	-0.07589	-0.0623739	-0.286164	-0.0463778	-0.200361	-0.0456127	-0.196481	-0.00718706	-0.0402535
Q96NW4.LDIGNEkGDTPLHIAAR	ANKRD27	K564k	ANKRD27.K564k		1.75	0.5	0.5	0.5	-1.41504	-1.75778				-1.65419	0.166389	1.44779	0.082885	1.15841	0.0835038	0.842725	0.0731852	0.34523	-0.189659	-1.30711	-0.107028	-0.568239	0.101423	1.03936	-0.143367	-0.869271	-0.0786234	-0.382747	-0.0462613	-0.199769	-0.0290895	-0.185362
Q96NW4.ESSEEPLAPSDPFSLkTIEDVR	ANKRD27	K136k	ANKRD27.K136k		1.25	1.5	2	2	0.222392	0.26967				-0.346609	0.129308	0.835172	0.00414792	0.0216159	0.12516	0.845656	0.289485	2.62423	-0.0727091	-0.342397	0.358201	3.85064	0.139759	1.71602	0.14795	0.910257	-0.0600708	-0.273252	-0.0137482	-0.0522506	0.093464	0.834835
Q96NW4.ELAQLNkcTSPQQK	ANKRD27	K276k	ANKRD27.K276k		0.75	0.75	0.25	0.5			0.584963	0.26967	0.584963	-0.171537	0.20391	1.88508	-0.010012	-0.0626101	0.213922	1.98421	-0.102887	-0.538616	-0.202934	-1.45381	-0.28503	-2.55434	0.0386046	0.281621	-0.167965	-1.1	-0.0899154	-0.455659	-0.158946	-1.01231	-0.0350677	-0.231166
O15084.kLLSSGFDIDTPDDFGR	ANKRD28	K390k	ANKRD28.K390k		1	1.5	0.5	1	0.485427	0.443709	0.736966	0.443709	0.736966		-0.0939611	-0.41248	0.149038	0.563686	-0.242999	-1.11116	0.0923632	0.466303	0.0189021	0.072607	0.0902326	0.452176	0.0283461	0.19443	0.263034	2.25975	-0.0714737	-0.339057	0.164616	1.06702	0.150295	1.73211
Q8N9B4.SGVDPSVTDkR	ANKRD42	K129k	ANKRD42.K129k		1	1	2.5	2			-0.289507	-0.740669	-0.289507	-0.511353							-0.0616149	-0.245121	-0.228013	-1.72648	-0.197814	-1.19522	0.0759666	0.625786	-0.223308	-1.35078	-0.172948	-0.905479	-0.251239	-1.80807	-0.0256757	-0.128437
[truncated: 22,684 more rows]
