# Supplementary material for: RANBP9 and RANBP10 cooperate in regulating non-small cell lung cancer proliferation
Source: J Exp Clin Cancer Res. 2025 Aug 29;44:259. doi: 10.1186/s13046-025-03491-8 (PMC12395873; doi:10.1186/s13046-025-03491-8)
Supplement: Supplementary file 13 — Supplementary Material 13. [file 13046_2025_3491_MOESM13_ESM.xlsx]

## Sheet: A549i DOX time course
A549 Scorpin WT iBP9 cells												A549 Scorpin WT iBP10 cells												A549 Scorpin WT cells
RanBP9	0	6	12	24	48	hrs						RanBP9	0	6	12	24	48	hrs						RanBP9	0	6	12	24	48	hrs
2022-09-01	1	4.29	9.53	13.06	17.61							2022-09-01	1	0.93	0.93	0.65	0.51							2022-09-01	1	0.93	0.89	0.89	0.88
RanBP10	0	6	12	24	48	hrs						RanBP10	0	6	12	24	48	hrs						RanBP10	0	6	12	24	48	hrs
2022-09-01	1	0.95	0.69	0.42	0.22							2022-09-01	1	4.7	7.53	9.28	12.39							2022-09-01	1	0.93	0.96	1.08	1.14
