# Supplementary material for: RANBP9 and RANBP10 cooperate in regulating non-small cell lung cancer proliferation
Source: J Exp Clin Cancer Res. 2025 Aug 29;44:259. doi: 10.1186/s13046-025-03491-8 (PMC12395873; doi:10.1186/s13046-025-03491-8)
Supplement: Supplementary file 14 — Supplementary Material 14. [file 13046_2025_3491_MOESM14_ESM.xlsx]

## Sheet: Sheet1
		Blot 1									Blot 6											Blot 11											Blot 16
							Normalized									Normalized													Normalized											Normalized
			RanBP9	GID8	Vinculin		RanBP9	GID8				RanBP9	GID8	Vinculin		RanBP9	GID8						RanBP9	Vinculin		GID8	Vinculin		RanBP9	GID8				RanBP9	Vinculin		GID8	Vinculin		RanBP9	GID8
	P112361613	10N	2908.61	12494	14102.3		0.20625	0.885953		P112362067	16N	401.77	5273.82	9917.56		0.040511	0.531766				P112365544	76N	24279.3	11019.6		9416.55	17949.3		2.20328	0.524618		P112378287	84N	3530.27	2663.69		8631.33	12812.2		1.32533	0.673682
		9T	17481.9	17994.2	13211.5		1.32323	1.36201			15T	11312.9	4960.53	14480.6		0.781243	0.342563					75T	21106.3	9758.34		15824.9	19291.9		2.1629	0.820288			83T	27415.7	3014.47		17186.8	18089.7		9.09471	0.95009
	P112362651	22N	1866.88	6574.67	25532.7		0.0731174	0.2575		P112362276	18N	1340.15	1099.13	8765.15		0.152896	0.125398				P112378112	78N	11876.4	7130.15		1031.38	6979.17		1.66565	0.147779		P112383359	88N	1478.47	3272.02		6980.07	15034.4		0.451851	0.464275
		21T	10613.8	19474	22978.6		0.461897	0.847484			17T	28377.4	7432.43	12469		2.27583	0.596071					77T	29916.3	5248.61		25040.3	8437.65		5.69985	2.96768			87T	19396.6	2652.93		15724.8	13704.9		7.31136	1.14738
	P112372685	28N	12053.4	20161.1	14636.9		0.823497	1.37742		P112362321	20N	9459.89	1152.43	8604.44		1.09942	0.133934				P112384924	92N	5143.63	8592.17		12591.1	13398.2		0.598642	0.939764		P112383854	90N	4721.92	8536.72		11609	12511.5		0.553131	0.927864
		27T	17143.5	46051.4	15495		1.10639	2.97202			19T	25561.6	17085.3	10797.1		2.36745	1.5824					91T	25545	5103.25		19362	7855.53		5.00563	2.46476			89T	16612.2	6950.14		18149.3	17054.3		2.3902	1.06421
		Blot 2									Blot 7																						Blot 17
							Normalized									Normalized						Blot 12																Normalized
			RanBP9	GID8	Vinculin		RanBP9	GID8				RanBP9	GID8	Vinculin		RanBP9	GID8										Normalized							RanBP9	GID8	Vinculin		RanBP9	GID8
	P112385081	38N	3707.68	9073.33	6519.54		0.568703	1.39171		P112364429	24N	401.77	7271.68	15781		0.0254591	0.460787						RanBP9	GID8	Vinculin		RanBP9	GID8				P112381839	34N	859.305	2263.34	1497.75		0.573731	1.51116
		37T	12641.7	10791.6	6655.56		1.89941	1.62145			23T	11312.9	19999.3	9959.82		1.13585	2.008				P112374927	68N	16266.2	7942.91	21475.7		0.757422	0.369856					33T	5820.18	4015.92	2034.31		2.86102	1.9741
	P112394386	44N	8471.86	5880.82	12671.3		0.668588	0.464106		P112380636	32N	1340.15	6228.24	11510.7		0.116427	0.541081					67T	12798.2	4767.8	11737.7		1.09035	0.406197				P112374787	80N	12959.9	1872.76	2678.18		4.83905	0.699265
		43T	26868.4	31158.1	13954.3		1.92546	2.23287			31T	28377.4	10962.6	12861.3		2.20641	0.852367				P112363113	72N	5943.48	4912.17	14907.2		0.3987	0.329517					79T	26579.5	4601.06	3220.84		8.25236	1.42853
	P112394761	46N	3713.95	23075.5	8685.94		0.427581	2.65664		P112387588	42N	9459.89	8524.77	13492.5		0.701123	0.631817					71T	17040.6	12327.6	19840.5		0.85888	0.621338				P112387762	96N	19070.2	1921.17	5866.69		3.25058	0.327472
		45T	8182.81	16535	7166.12		1.14188	2.30738			41T	25561.6	18898.1	13058.7		1.95744	1.44717				P112365306	74N	8758.94	8356.69	28652.6		0.305694	0.291655					95T	22250.9	5399.4	2572.2		8.65051	2.09913
																						73T	29234.6	26270.3	27588.5		1.05967	0.952218
		Blot 3									Blot 8											Blot 13
							Normalized									Normalized													Normalized
			RanBP9	GID8	Vinculin		RanBP9	GID8				RanBP9	GID8	Vinculin		RanBP9	GID8						RanBP9	Vinculin		GID8	Vinculin		RanBP9	GID8
	P112395750	48N	598.619	4021.63	7526.37		0.0795362	0.534339		P112365544	26N	2195.2	2175.76	13107.8		0.167472	0.16599				P112377306	82N	9766.36	4957.78		2851.44	11762.5		1.9699	0.242417
		47T	7125.24	4324.78	7466.44		0.954302	0.57923			25T	11157.3	6640.25	10477		1.06493	0.633794					81T	24941.6	6099.27		5475.24	6072.39		4.08928	0.901661
	P112396562	50N	2847.2	9801.67	9152.87		0.311071	1.07088		P112378112	30N	710.79	2964.37	11752		0.0604823	0.252243				P112397094	100N	1599.06	1509.67		0	1780.05		1.05921	0
		49T	5379.02	16956.5	9329.53		0.576558	1.81751			29T	8838.49	7792.66	8968.25		0.985532	0.868917					99T	28829.7	3051.81		3051.54	6420.85		9.44675	0.475254
	P112360767	4N	4517.41	9968.94	11030.6		0.409534	0.903753		P112384924	36N	2104.28	4930.02	11642.9		0.180735	0.423436
		3T	24311	26482.5	10053.5		2.41817	2.63416			35T	15893.7	7771.71	8308.15		1.91303	0.935433
		Blot 4									Blot 9											Blot 14
							Normalized											Normalized									Normalized
			RanBP9	GID8	Vinculin		RanBP9	GID8				RanBP9	Vinculin		GID8	Vinculin		RanBP9	GID8				RanBP9	GID8	Vinculin		RanBP9	GID8
	P112360623	2N	649.891	5294.58	11994		0.0541846	0.441435		P112359287	52N	1637.69	10150.4		3804.71	16149.5		0.161343	0.235594		P112380388	86N	1480.13	3721.97	10229.9		0.144687	0.363833
		1T	2780.4	3672.34	11441.9		0.243001	0.320955			51T	6237.71	7880.88		12916.1	12396.9		0.791499	1.04188			85T	6947.29	6085.75	5193.76		1.33762	1.17174
	P112361453	6N	660.891	4844.87	14080.1		0.0469378	0.344093		P112362434	56N	1494.45	6694.83		6010.24	13924.4		0.223224	0.431635		P112384815	94N	2066.62	1382.45	4774.27		0.432866	0.289562
		5T	7557.07	12588	13850.1		0.545633	0.908872			55T	5654.42	5826.86		17050.2	15195.1		0.970406	1.12208			93T	12270.4	6761.05	3829.47		3.20419	1.76553
	P112361456	8N	1169.06	8693.43	17303.7		0.0675615	0.502404		P112362666	58N	2365.35	8633.73		3601.9	15180.6		0.273966	0.23727		P112376385	70N	7701.36	6682.24	6979.54		1.10342	0.957404
		7T	25656.9	24696.3	12283		2.08881	2.01062			57T	10926.4	8461.97		18390.5	14482.7		1.29124	1.26983			69T	3321.1	2606.62	3196.28		1.03905	0.815517
		Blot 5									Blot 10											Blot 15
							Normalized											Normalized									Normalized
			RanBP9	GID8	Vinculin		RanBP9	GID8				RanBP9	Vinculin		GID8	Vinculin		RanBP9	GID8				RanBP9	GID8	Vinculin		RanBP9	GID8
	P112362063	14N	649.891	5294.58	12296.2		0.0528531	0.430588		P112363900	60N	6128.89	9912.49		32565.4	27191.1		0.6183	1.19765		P112394586	98N	3470.87	4731.19	8406.97		0.412857	0.56277
		13T	2780.4	3672.34	21917.4		0.126858	0.167554			59T	1621.66	3279.12		29336.2	20494		0.49454	1.43145			97T	11103.7	11428.6	13107.4		0.847133	0.871926
	P112361970	12N	660.891	4844.87	15507.8		0.0426168	0.312416		P112364148	62N	3299.61	9093.9		10272.5	15673.6		0.362838	0.655398		P112360668	54N	3649.63	4930.19	14621.5		0.249608	0.337189
		11T	7557.07	12588	21822.2		0.346302	0.576842			61T	6647.85	5845.47		25226.5	23046.1		1.13727	1.09461			53T	36990.6	19486.7	16338		2.26409	1.19273
	P112396562	40N	1169.06	8693.43	18587.1		0.0628963	0.467713		P112364941	66N	3835.25	12789.5		3762.54	22711.1		0.299875	0.16567		P112364436	64N	11523.2	6756.77	23696.9		0.486275	0.285133
		39T	25656.9	24696.3	21169.5		1.21197	1.1666			65T	9268.29	10307.4		18298.7	16076.5		0.899184	1.13823			63T	12768.1	11699	27749.1		0.460126	0.4216
