# Supplementary material for: RANBP9 and RANBP10 cooperate in regulating non-small cell lung cancer proliferation
Source: J Exp Clin Cancer Res. 2025 Aug 29;44:259. doi: 10.1186/s13046-025-03491-8 (PMC12395873; doi:10.1186/s13046-025-03491-8)
Supplement: Supplementary file 15 — Supplementary Material 15. [file 13046_2025_3491_MOESM15_ESM.xlsx]

## Sheet: ΔΔCt
			GAPDH	RanBP9						SD					FC Avg	SDbar min	SDbar max
			Ct	Ct	DCt	Avg DCt	DDCt	Avg DDCt	2-DDCt (FC)	SD DDCt	Lower limit	Upper limit		WT	1	0.0826024	0.0900399
	WT	n1	20.707	27.8315	7.12453	7.17324	-0.0487156	0	1	0.124381	0.917398	1.09004		BP9KO	0.14893	0.0531965	0.0827563
		n2	20.6351	27.9497	7.31461		0.141365							BP10KO	0.958732	0.112435	0.127373
		n3	20.7047	27.7853	7.08059		-0.0926495							DKO	0.119497	0.0235225	0.0292877
	BP9KO	n1	21.6681	30.8658	9.19772	9.92053	2.02448	2.74729	0.14893	0.637537	0.0957338	0.231687
		n2	20.6616	31.0644	10.4028		3.22958								P value from t-test (DCt)
		n3	20.6185	30.7796	10.1611		2.98781							WT
	BP10KO	n1	20.6139	28.0436	7.42974	7.23404	0.256502	0.0607999	0.958732	0.179964	0.846297	1.08611		BP9KO	0.0147764
		n2	20.6467	27.8434	7.19671		0.0234661							BP10KO	0.65835
		n3	20.6406	27.7163	7.07567		-0.0975685							DKO	0.00120533
	DKO	n1	20.9716	30.9453	9.97374	10.2382	2.8005	3.06496	0.119497	0.316252	0.0959743	0.148784
		n2	21.075	31.6635	10.5885		3.41527
		n3	20.9885	31.1408	10.1523		2.9791
			GAPDH	RanBP10						SD					FC Avg	SDbar min	SDbar max
			Ct	Ct	DCt	Avg DCt	DDCt	Avg DDCt	2-DDCt (FC)	SD DDCt	Lower limit	Upper limit		WT	1	0.0229134	0.0234508
	WT	n1	20.707	29.9817	9.27474	9.23652	0.038215	5.92119e-16	1	0.0334417	0.977087	1.02345		BP9KO	1.4768	0.492374	0.738642
		n2	20.6351	29.8573	9.22222		-0.0143058							BP10KO	0.264576	0.0488821	0.0599601
		n3	20.7047	29.9173	9.21261		-0.0239093							DKO	0.0119624	#VALUE!	#VALUE!
	BP9KO	n1	21.6681	29.6687	8.00059	8.67405	-1.23593	-0.56247	1.4768	0.585122	0.984422	2.21544
		n2	20.6616	29.7194	9.05775		-0.178769								P value from t-test (DCt)
		n3	20.6185	29.5824	8.96381		-0.272711							WT
	BP10KO	n1	20.6139	32.0914	11.4775	11.1548	2.241	1.91824	0.264576	0.294697	0.215694	0.324536		BP9KO	0.237545
		n2	20.6467	31.7334	11.0868		1.85024							BP10KO	0.0071894
		n3	20.6406	31.5406	10.9		1.6635							DKO	#DIV/0!
	DKO	n1	20.9716	Undetermined	#VALUE!	#VALUE!	#VALUE!	6.38535	0.0119624	#VALUE!	#VALUE!	#VALUE!
		n2	21.075	Undetermined	#VALUE!		#VALUE!
		n3	20.9885	36.6104	15.6219		6.38535
			GAPDH	GID8						SD					FC Avg	SDbar min	SDbar max
			Ct	Ct	DCt	Avg DCt	DDCt	Avg DDCt	2-DDCt (FC)	SD DDCt	Lower limit	Upper limit		WT	1	0.392379	0.645763
	WT	n1	20.519	28.9665	8.44751	7.62181	0.825698	2.96059e-16	1	0.718756	0.607621	1.64576		BP9KO	1.32126	0.0667426	0.0702934
		n2	20.7974	28.079	7.28161		-0.340196							BP10KO	1.20093	0.0191236	0.0194331
		n3	20.7398	27.8761	7.13631		-0.485502							DKO	1.32223	0.134851	0.150167
	BP9KO	n1	20.7763	27.9457	7.16945	7.21989	-0.45236	-0.401918	1.32126	0.0747817	1.25452	1.39156
		n2	20.6507	27.9565	7.30581		-0.316001								P value from t-test (DCt)
		n3	20.7446	27.929	7.18442		-0.437394							WT
	BP10KO	n1	20.7901	28.1745	7.3844	7.35766	-0.237407	-0.264148	1.20093	0.0231584	1.1818	1.22036		BP9KO	0.435171
		n2	20.7936	28.1379	7.34431		-0.277501							BP10KO	0.589617
		n3	20.7207	28.0649	7.34427		-0.277536							DKO	0.435297
	DKO	n1	21.1035	28.2918	7.18824	7.21884	-0.433572	-0.402972	1.32223	0.155193	1.18738	1.4724
		n2	21.1268	28.208	7.08122		-0.540586
		n3	21.0336	28.4207	7.38705		-0.234758
			GAPDH	MAEA						SD					FC Avg	SDbar min	SDbar max
			Ct	Ct	DCt	Avg DCt	DDCt	Avg DDCt	2-DDCt (FC)	SD DDCt	Lower limit	Upper limit		WT	1	0.244232	0.323157
	WT	n1	20.4221	28.1067	7.68452	7.32585	0.358665	-2.96059e-16	1	0.403984	0.755768	1.32316		BP9KO	1.29463	0.0952475	0.102811
		n2	20.6914	28.0962	7.40483		0.078975							BP10KO	1.13737	0.179028	0.212472
		n3	20.654	27.5422	6.88821		-0.43764							DKO	1.34222	0.130458	0.144503
	BP9KO	n1	20.8203	27.8312	7.01088	6.95332	-0.314974	-0.372538	1.29463	0.110248	1.19938	1.39744
		n2	20.6695	27.4957	6.8262		-0.499653								P value from t-test (DCt)
		n3	20.7226	27.7455	7.02287		-0.302987							WT
	BP10KO	n1	20.8463	28.2695	7.42321	7.14016	0.0973581	-0.185698	1.13737	0.247089	0.95834	1.34984		BP9KO	0.247421
		n2	20.8237	27.7913	6.9676		-0.35825							BP10KO	0.541462
		n3	20.7318	27.7614	7.02965		-0.296202							DKO	0.202713
	DKO	n1	21.0512	27.9784	6.92722	6.90123	-0.398637	-0.424621	1.34222	0.147515	1.21176	1.48672
		n2	21.1141	27.8566	6.74245		-0.583401
		n3	21.0092	28.0432	7.03403		-0.291825
			GAPDH	MKLN1						SD					FC Avg	SDbar min	SDbar max
			Ct	Ct	DCt	Avg DCt	DDCt	Avg DDCt	2-DDCt (FC)	SD DDCt	Lower limit	Upper limit		WT	1	0.124919	0.142751
	WT	n1	20.4221	27.5565	7.13441	6.91436	0.220053	0	1	0.192511	0.875081	1.14275		BP9KO	1.41009	0.0992261	0.106737
		n2	20.6914	27.4685	6.77707		-0.137289							BP10KO	1.46036	0.0949799	0.101587
		n3	20.654	27.4856	6.8316		-0.0827637							DKO	1.02248	0.0697746	0.0748847
	BP9KO	n1	20.8203	27.1587	6.33836	6.41857	-0.576002	-0.49579	1.41009	0.105269	1.31087	1.51683
		n2	20.6695	27.2072	6.53777		-0.376589								P value from t-test (DCt)
		n3	20.7226	27.1022	6.37958		-0.534781							WT
	BP10KO	n1	20.8463	27.3196	6.47336	6.36803	-0.441002	-0.546325	1.46036	0.0970213	1.36538	1.56195		BP9KO	0.0279665
		n2	20.8237	27.106	6.28231		-0.632053							BP10KO	0.0226088
		n3	20.7318	27.0802	6.34844		-0.56592							DKO	0.814966
	DKO	n1	21.0512	27.8181	6.76686	6.88228	-0.147505	-0.0320791	1.02248	0.10197	0.95271	1.09737
		n2	21.1141	28.034	6.91986		0.00549507
		n3	21.0092	27.9693	6.96013		0.0457726
			GAPDH	RMND5A						SD					FC Avg	SDbar min	SDbar max
			Ct	Ct	DCt	Avg DCt	DDCt	Avg DDCt	2-DDCt (FC)	SD DDCt	Lower limit	Upper limit		WT	1	0.141938	0.165417
	WT	n1	20.4221	29.3438	8.92163	8.66675	0.254873	0	1	0.220846	0.858062	1.16542		BP9KO	0.862956	0.103328	0.117383
		n2	20.6914	29.238	8.54658		-0.120171							BP10KO	1.21574	0.0268687	0.027476
		n3	20.654	29.1861	8.53205		-0.134703							DKO	1.67906	0.0843623	0.0888252
	BP9KO	n1	20.8203	29.8115	8.99116	8.87939	0.324408	0.212641	0.862956	0.183994	0.759628	0.98034
		n2	20.6695	29.6494	8.97999		0.313234								P value from t-test (DCt)
		n3	20.7226	29.3897	8.66703		0.00028038							WT
	BP10KO	n1	20.8463	29.2684	8.42212	8.38492	-0.244629	-0.281834	1.21574	0.0322422	1.18887	1.24322		BP9KO	0.271416
		n2	20.8237	29.1912	8.36751		-0.299246							BP10KO	0.155037
		n3	20.7318	29.0969	8.36513		-0.301626							DKO	0.0192891
	DKO	n1	21.0512	29.0216	7.97036	7.9191	-0.696388	-0.747653	1.67906	0.0743709	1.5947	1.76788
		n2	21.1141	28.9479	7.8338		-0.832951
		n3	21.0092	28.9623	7.95313		-0.713619
			GAPDH	RMND5B						SD					FC Avg	SDbar min	SDbar max
			Ct	Ct	DCt	Avg DCt	DDCt	Avg DDCt	2-DDCt (FC)	SD DDCt	Lower limit	Upper limit		WT	1	0.112538	0.126808
	WT	n1	20.4976	27.165	6.66737	6.56234	0.105038	2.96059e-16	1	0.172242	0.887462	1.12681		BP9KO	0.80138	0.0783826	0.0868804
		n2	20.7476	27.4037	6.65608		0.093743							BP10KO	0.754776	0.265043	0.408485
		n3	20.7576	27.1211	6.36355		-0.198781							DKO	1.0677	0.0650466	0.0692665
	BP9KO	n1	20.8737	27.8135	6.93984	6.88178	0.377507	0.319442	0.80138	0.148496	0.722997	0.88826
		n2	20.6812	27.6736	6.99247		0.430133								P value from t-test (DCt)
		n3	20.736	27.449	6.71302		0.150687							WT
	BP10KO	n1	20.8647	27.4494	6.58474	6.96821	0.0224005	0.405879	0.754776	0.624054	0.489733	1.16326		BP9KO	0.0731322
		n2	20.8324	27.464	6.63161		0.0692698							BP10KO	0.377994
		n3	20.6346	28.3229	7.6883		1.12597							DKO	0.461574
	DKO	n1	21.1196	27.6222	6.50258	6.46783	-0.0597509	-0.0945085	1.0677	0.0906833	1.00265	1.13697
		n2	21.1525	27.5174	6.36491		-0.197429
		n3	21.0326	27.5685	6.53599		-0.0263456
			GAPDH	ARMC8						SD					FC Avg	SDbar min	SDbar max
			Ct	Ct	DCt	Avg DCt	DDCt	Avg DDCt	2-DDCt (FC)	SD DDCt	Lower limit	Upper limit		WT	1	0.150952	0.177789
	WT	n1	20.4221	28.9018	8.47966	8.27793	0.201726	5.92119e-16	1	0.236082	0.849048	1.17779		BP9KO	1.4918	0.156948	0.175402
		n2	20.6914	29.0272	8.33586		0.0579274							BP10KO	1.17951	0.343558	0.484753
		n3	20.654	28.6723	8.01828		-0.259654							DKO	1.26057	0.0469957	0.0488156
	BP9KO	n1	20.8203	28.5857	7.76537	7.70088	-0.512562	-0.57705	1.4918	0.160375	1.33485	1.6672
		n2	20.6695	28.4884	7.81897		-0.458956								P value from t-test (DCt)
		n3	20.7226	28.2409	7.5183		-0.759631							WT
	BP10KO	n1	20.8463	28.6053	7.75906	8.03974	-0.518874	-0.238187	1.17951	0.496696	0.835951	1.66426		BP9KO	0.0305402
		n2	20.8237	28.5706	7.74694		-0.530993							BP10KO	0.510061
		n3	20.7318	29.345	8.61324		0.335306							DKO	0.127362
	DKO	n1	21.0512	29.0122	7.96099	7.94386	-0.316939	-0.334075	1.26057	0.0548138	1.21357	1.30938
		n2	21.1141	29.1022	7.98805		-0.289876
		n3	21.0092	28.8917	7.88252		-0.395409
			GAPDH	GID4						SD					FC Avg	SDbar min	SDbar max
			Ct	Ct	DCt	Avg DCt	DDCt	Avg DDCt	2-DDCt (FC)	SD DDCt	Lower limit	Upper limit		WT	1	0.195092	0.242377
	WT	n1	20.4221	29.2792	8.85709	8.4956	0.361492	0	1	0.313103	0.804908	1.24238		BP9KO	1.70586	0.0741249	0.0774922
		n2	20.6914	29.0011	8.30973		-0.185875							BP10KO	1.09225	0.0206625	0.0210609
		n3	20.654	28.974	8.31998		-0.175617							DKO	1.37838	0.10399	0.112476
	BP9KO	n1	20.8203	28.4715	7.6512	7.7251	-0.844398	-0.770502	1.70586	0.0640923	1.63174	1.78336
		n2	20.6695	28.428	7.75854		-0.737062								P value from t-test (DCt)
		n3	20.7226	28.4882	7.76556		-0.730045							WT
	BP10KO	n1	20.8463	29.2446	8.39832	8.3683	-0.0972786	-0.127305	1.09225	0.0275534	1.07159	1.11331		BP9KO	0.0459157
		n2	20.8237	29.1679	8.34417		-0.151428							BP10KO	0.55465
		n3	20.7318	29.0942	8.36239		-0.133209							DKO	0.11174
	DKO	n1	21.0512	29.134	8.08275	8.03263	-0.412849	-0.462976	1.37838	0.113167	1.27439	1.49086
		n2	21.1141	29.0172	7.90305		-0.592548
		n3	21.0092	29.1212	8.11207		-0.38353
			GAPDH	WDR26						SD					FC Avg	SDbar min	SDbar max
			Ct	Ct	DCt	Avg DCt	DDCt	Avg DDCt	2-DDCt (FC)	SD DDCt	Lower limit	Upper limit		WT	1	0.0819014	0.0892076
	WT	n1	20.4976	27.6442	7.14658	7.00424	0.142333	-2.96059e-16	1	0.123279	0.918099	1.08921		BP9KO	1.34772	0.102484	0.110918
		n2	20.7476	27.6826	6.93498		-0.069266							BP10KO	1.26193	0.0527122	0.05501
		n3	20.7576	27.6887	6.93118		-0.0730673							DKO	1.57844	0.0299583	0.0305379
	BP9KO	n1	20.8737	27.3179	6.44424	6.57373	-0.560002	-0.430516	1.34772	0.114102	1.24523	1.45863
		n2	20.6812	27.3407	6.65955		-0.344697								P value from t-test (DCt)
		n3	20.736	27.3534	6.61739		-0.386849							WT
	BP10KO	n1	20.8647	27.492	6.62725	6.66861	-0.376996	-0.335637	1.26193	0.0615576	1.20922	1.31694		BP9KO	0.0114951
		n2	20.8324	27.4716	6.63922		-0.365021							BP10KO	0.0253491
		n3	20.6346	27.3739	6.73935		-0.264893							DKO	0.00885253
	DKO	n1	21.1196	27.4546	6.33496	6.34574	-0.669284	-0.658504	1.57844	0.027645	1.54849	1.60898
		n2	21.1525	27.4776	6.32511		-0.679135
		n3	21.0326	27.4097	6.37715		-0.627093
			GAPDH	YPEL5						SD					FC Avg	SDbar min	SDbar max
			Ct	Ct	DCt	Avg DCt	DDCt	Avg DDCt	2-DDCt (FC)	SD DDCt	Lower limit	Upper limit		WT	1	0.21787	0.27856
	WT	n1	20.4976	34.2299	13.7323	13.3999	0.332429	5.92119e-16	1	0.35452	0.78213	1.27856		BP9KO	0.989065	0.0547071	0.0579102
		n2	20.7476	34.1882	13.4405		0.0406736							BP10KO	0.608772	0.167775	0.231603
		n3	20.7576	33.7843	13.0268		-0.373103							DKO	1.50462	0.160766	0.179999
	BP9KO	n1	20.8737	34.3446	13.4709	13.4157	0.0710862	0.0158628	0.989065	0.0820901	0.934358	1.04698
		n2	20.6812	34.136	13.4548		0.0549711								P value from t-test (DCt)
		n3	20.736	34.0574	13.3214		-0.078469							WT
	BP10KO	n1	20.8647	35.5137	14.649	14.1159	1.24915	0.716026	0.608772	0.465132	0.440998	0.840376		BP9KO	0.946092
		n2	20.8324	34.7381	13.9057		0.505863							BP10KO	0.10612
		n3	20.6346	34.4275	13.7929		0.393064							DKO	0.0848181
	DKO	n1	21.1196	34.1177	12.9981	12.8105	-0.401753	-0.589401	1.50462	0.163023	1.34386	1.68462
		n2	21.1525	33.8562	12.7037		-0.696179
		n3	21.0326	33.7621	12.7296		-0.67027

## Sheet: 10-8-22_1
Block Type	96well
Chemistry	TAQMAN
Experiment File Name	C:\Applied Biosystems\StepOne Software v2.3\experiments\Coppola\Yasuko\A549KO 10082022.eds
Experiment Run End Time	2022-10-08 14:23:48 PM EDT
Instrument Type	steponeplus
Passive Reference	ROX
Well	Sample Name	Target Name	Task	Reporter	Quencher	Cт	Cт Mean	Cт SD	Quantity	Quantity Mean	Quantity SD	Automatic Ct Threshold	Ct Threshold	Automatic Baseline	Baseline Start	Baseline End	Comments	HIGHSD	EXPFAIL
A1																		N	N
A2																		N	N
A3																		N	N
A4																		N	N
A5																		N	N
A6																		N	N
A7																		N	N
A8																		N	N
A9																		N	N
A10																		N	N
A11																		N	N
A12																		N	N
B1																		N	N
B2																		N	N
B3	WT	Ranbp9	UNKNOWN	FAM	NFQ-MGB	27.8315	27.8555	0.084802				FALSE	0.306722	TRUE	3	22		N	N
B4	WT	Ranbp9	UNKNOWN	FAM	NFQ-MGB	27.9497	27.8555	0.084802				FALSE	0.306722	TRUE	3	22		N	N
B5	WT	Ranbp9	UNKNOWN	FAM	NFQ-MGB	27.7853	27.8555	0.084802				FALSE	0.306722	TRUE	3	22		N	N
B6	WT	Ranbp10	UNKNOWN	FAM	NFQ-MGB	29.9817	29.9188	0.0622313				FALSE	0.250957	TRUE	3	25		N	N
B7	WT	Ranbp10	UNKNOWN	FAM	NFQ-MGB	29.8573	29.9188	0.0622313				FALSE	0.250957	TRUE	3	25		N	N
B8	WT	Ranbp10	UNKNOWN	FAM	NFQ-MGB	29.9173	29.9188	0.0622313				FALSE	0.250957	TRUE	3	24		N	N
B9	WT	Gapdh	UNKNOWN	FAM	NFQ-MGB	20.707	20.6823	0.040859				FALSE	0.277442	TRUE	3	15		N	N
B10	WT	Gapdh	UNKNOWN	FAM	NFQ-MGB	20.6351	20.6823	0.040859				FALSE	0.277442	TRUE	3	15		N	N
B11	WT	Gapdh	UNKNOWN	FAM	NFQ-MGB	20.7047	20.6823	0.040859				FALSE	0.277442	TRUE	3	15		N	N
B12																		N	N
C1																		N	N
C2																		N	N
C3	BP9KO	Ranbp9	UNKNOWN	FAM	NFQ-MGB	30.8658	30.9033	0.146078				FALSE	0.306722	TRUE	3	25		N	N
C4	BP9KO	Ranbp9	UNKNOWN	FAM	NFQ-MGB	31.0644	30.9033	0.146078				FALSE	0.306722	TRUE	3	25		N	N
C5	BP9KO	Ranbp9	UNKNOWN	FAM	NFQ-MGB	30.7796	30.9033	0.146078				FALSE	0.306722	TRUE	3	25		N	N
C6	BP9KO	Ranbp10	UNKNOWN	FAM	NFQ-MGB	29.6687	29.6568	0.0692764				FALSE	0.250957	TRUE	3	24		N	N
C7	BP9KO	Ranbp10	UNKNOWN	FAM	NFQ-MGB	29.7194	29.6568	0.0692764				FALSE	0.250957	TRUE	3	24		N	N
C8	BP9KO	Ranbp10	UNKNOWN	FAM	NFQ-MGB	29.5824	29.6568	0.0692764				FALSE	0.250957	TRUE	3	24		N	N
C9	BP9KO	Gapdh	UNKNOWN	FAM	NFQ-MGB	21.6681	20.9827	0.593894				FALSE	0.277442	TRUE	3	17		Y	N
C10	BP9KO	Gapdh	UNKNOWN	FAM	NFQ-MGB	20.6616	20.9827	0.593894				FALSE	0.277442	TRUE	3	15		Y	N
C11	BP9KO	Gapdh	UNKNOWN	FAM	NFQ-MGB	20.6185	20.9827	0.593894				FALSE	0.277442	TRUE	3	15		Y	N
C12																		N	N
D1																		N	N
D2																		N	N
D3	BP10KO	Ranbp9	UNKNOWN	FAM	NFQ-MGB	28.0436	27.8678	0.165034				FALSE	0.306722	TRUE	3	22		N	N
D4	BP10KO	Ranbp9	UNKNOWN	FAM	NFQ-MGB	27.8434	27.8678	0.165034				FALSE	0.306722	TRUE	3	22		N	N
D5	BP10KO	Ranbp9	UNKNOWN	FAM	NFQ-MGB	27.7163	27.8678	0.165034				FALSE	0.306722	TRUE	3	22		N	N
D6	BP10KO	Ranbp10	UNKNOWN	FAM	NFQ-MGB	32.0914	31.7885	0.27949				FALSE	0.250957	TRUE	3	27		N	N
D7	BP10KO	Ranbp10	UNKNOWN	FAM	NFQ-MGB	31.7334	31.7885	0.27949				FALSE	0.250957	TRUE	3	27		N	N
D8	BP10KO	Ranbp10	UNKNOWN	FAM	NFQ-MGB	31.5406	31.7885	0.27949				FALSE	0.250957	TRUE	3	26		N	N
D9	BP10KO	Gapdh	UNKNOWN	FAM	NFQ-MGB	20.6139	20.6337	0.0174419				FALSE	0.277442	TRUE	3	15		N	N
D10	BP10KO	Gapdh	UNKNOWN	FAM	NFQ-MGB	20.6467	20.6337	0.0174419				FALSE	0.277442	TRUE	3	15		N	N
D11	BP10KO	Gapdh	UNKNOWN	FAM	NFQ-MGB	20.6406	20.6337	0.0174419				FALSE	0.277442	TRUE	3	15		N	N
D12																		N	N
E1																		N	N
E2																		N	N
E3	DKO	Ranbp9	UNKNOWN	FAM	NFQ-MGB	30.9453	31.2499	0.371317				FALSE	0.306722	TRUE	3	25		N	N
E4	DKO	Ranbp9	UNKNOWN	FAM	NFQ-MGB	31.6635	31.2499	0.371317				FALSE	0.306722	TRUE	3	26		N	N
E5	DKO	Ranbp9	UNKNOWN	FAM	NFQ-MGB	31.1408	31.2499	0.371317				FALSE	0.306722	TRUE	3	25		N	N
E6	DKO	Ranbp10	UNKNOWN	FAM	NFQ-MGB	Undetermined	36.6104					FALSE	0.250957	TRUE	3	39		N	Y
E7	DKO	Ranbp10	UNKNOWN	FAM	NFQ-MGB	Undetermined	36.6104					FALSE	0.250957	TRUE	3	39		N	Y
E8	DKO	Ranbp10	UNKNOWN	FAM	NFQ-MGB	36.6104	36.6104					FALSE	0.250957	TRUE	3	31		N	N
E9	DKO	Gapdh	UNKNOWN	FAM	NFQ-MGB	20.9716	21.0117	0.0554819				FALSE	0.277442	TRUE	3	15		N	N
E10	DKO	Gapdh	UNKNOWN	FAM	NFQ-MGB	21.075	21.0117	0.0554819				FALSE	0.277442	TRUE	3	16		N	N
E11	DKO	Gapdh	UNKNOWN	FAM	NFQ-MGB	20.9885	21.0117	0.0554819				FALSE	0.277442	TRUE	3	15		N	N
E12																		N	N
F1																		N	N
F2																		N	N
F3																		N	N
F4																		N	N
F5																		N	N
F6																		N	N
F7																		N	N
F8																		N	N
F9																		N	N
F10																		N	N
F11																		N	N
F12																		N	N
G1																		N	N
G2																		N	N
G3																		N	N
G4																		N	N
G5																		N	N
G6																		N	N
G7																		N	N
G8																		N	N
G9																		N	N
G10																		N	N
G11																		N	N
G12																		N	N
H1																		N	N
H2																		N	N
H3																		N	N
H4																		N	N
H5																		N	N
H6																		N	N
H7																		N	N
H8																		N	N
H9																		N	N
H10																		N	N
H11																		N	N
H12																		N	N

## Sheet: 10-8-22_2
Block Type	96well
Chemistry	TAQMAN
Experiment File Name	C:\Applied Biosystems\StepOne Software v2.3\experiments\Coppola\Yasuko\A549KO10082022_2.eds
Experiment Run End Time	2022-10-08 15:41:10 PM EDT
Instrument Type	steponeplus
Passive Reference	ROX
Well	Sample Name	Target Name	Task	Reporter	Quencher	Cт	Cт Mean	Cт SD	Quantity	Quantity Mean	Quantity SD	Automatic Ct Threshold	Ct Threshold	Automatic Baseline	Baseline Start	Baseline End	Comments	HIGHSD
A1	WT	Gid8	UNKNOWN	FAM	NFQ-MGB	28.9665	28.3072	0.579895				FALSE	0.269142	TRUE	3	24		Y
A2	WT	Gid8	UNKNOWN	FAM	NFQ-MGB	28.079	28.3072	0.579895				FALSE	0.269142	TRUE	3	22		Y
A3	WT	Gid8	UNKNOWN	FAM	NFQ-MGB	27.8761	28.3072	0.579895				FALSE	0.269142	TRUE	3	22		Y
A4	BP9KO	Gid8	UNKNOWN	FAM	NFQ-MGB	27.9457	27.9437	0.013843				FALSE	0.269142	TRUE	3	22		N
A5	BP9KO	Gid8	UNKNOWN	FAM	NFQ-MGB	27.9565	27.9437	0.013843				FALSE	0.269142	TRUE	3	22		N
A6	BP9KO	Gid8	UNKNOWN	FAM	NFQ-MGB	27.929	27.9437	0.013843				FALSE	0.269142	TRUE	3	22		N
A7	BP10KO	Gid8	UNKNOWN	FAM	NFQ-MGB	28.1745	28.1258	0.0558009				FALSE	0.269142	TRUE	3	23		N
A8	BP10KO	Gid8	UNKNOWN	FAM	NFQ-MGB	28.1379	28.1258	0.0558009				FALSE	0.269142	TRUE	3	22		N
A9	BP10KO	Gid8	UNKNOWN	FAM	NFQ-MGB	28.0649	28.1258	0.0558009				FALSE	0.269142	TRUE	3	23		N
A10	DKO	Gid8	UNKNOWN	FAM	NFQ-MGB	28.2918	28.3068	0.107109				FALSE	0.269142	TRUE	3	23		N
A11	DKO	Gid8	UNKNOWN	FAM	NFQ-MGB	28.208	28.3068	0.107109				FALSE	0.269142	TRUE	3	23		N
A12	DKO	Gid8	UNKNOWN	FAM	NFQ-MGB	28.4207	28.3068	0.107109				FALSE	0.269142	TRUE	3	23		N
B1	WT	Gapdh	UNKNOWN	FAM	NFQ-MGB	20.519	20.6854	0.146979				FALSE	0.293838	TRUE	3	15		N
B2	WT	Gapdh	UNKNOWN	FAM	NFQ-MGB	20.7974	20.6854	0.146979				FALSE	0.293838	TRUE	3	16		N
B3	WT	Gapdh	UNKNOWN	FAM	NFQ-MGB	20.7398	20.6854	0.146979				FALSE	0.293838	TRUE	3	15		N
B4	BP9KO	Gapdh	UNKNOWN	FAM	NFQ-MGB	20.7763	20.7238	0.0653323				FALSE	0.293838	TRUE	3	15		N
B5	BP9KO	Gapdh	UNKNOWN	FAM	NFQ-MGB	20.6507	20.7238	0.0653323				FALSE	0.293838	TRUE	3	16		N
B6	BP9KO	Gapdh	UNKNOWN	FAM	NFQ-MGB	20.7446	20.7238	0.0653323				FALSE	0.293838	TRUE	3	15		N
B7	BP10KO	Gapdh	UNKNOWN	FAM	NFQ-MGB	20.7901	20.7681	0.0411492				FALSE	0.293838	TRUE	3	15		N
B8	BP10KO	Gapdh	UNKNOWN	FAM	NFQ-MGB	20.7936	20.7681	0.0411492				FALSE	0.293838	TRUE	3	15		N
B9	BP10KO	Gapdh	UNKNOWN	FAM	NFQ-MGB	20.7207	20.7681	0.0411492				FALSE	0.293838	TRUE	3	16		N
B10	DKO	Gapdh	UNKNOWN	FAM	NFQ-MGB	21.1035	21.088	0.0485087				FALSE	0.293838	TRUE	3	16		N
B11	DKO	Gapdh	UNKNOWN	FAM	NFQ-MGB	21.1268	21.088	0.0485087				FALSE	0.293838	TRUE	3	15		N
B12	DKO	Gapdh	UNKNOWN	FAM	NFQ-MGB	21.0336	21.088	0.0485087				FALSE	0.293838	TRUE	3	15		N
C1																		N
C2																		N
C3																		N
C4																		N
C5																		N
C6																		N
C7																		N
C8																		N
C9																		N
C10																		N
C11																		N
C12																		N
D1																		N
D2																		N
D3																		N
D4																		N
D5																		N
D6																		N
D7																		N
D8																		N
D9																		N
D10																		N
D11																		N
D12																		N
E1																		N
E2																		N
E3																		N
E4																		N
E5																		N
E6																		N
E7																		N
E8																		N
E9																		N
E10																		N
E11																		N
E12																		N
F1																		N
F2																		N
F3																		N
F4																		N
F5																		N
F6																		N
F7																		N
F8																		N
F9																		N
F10																		N
F11																		N
F12																		N
G1																		N
G2																		N
G3																		N
G4																		N
G5																		N
G6																		N
G7																		N
G8																		N
G9																		N
G10																		N
G11																		N
G12																		N
H1																		N
H2																		N
H3																		N
H4																		N
H5																		N
H6																		N
H7																		N
H8																		N
H9																		N
H10																		N
H11																		N
H12																		N

## Sheet: 10-9-22_1
Block Type	96well
Chemistry	TAQMAN
Experiment File Name	C:\Applied Biosystems\StepOne Software v2.3\experiments\Coppola\Yasuko\A549KO 10092022.eds
Experiment Run End Time	2022-10-09 16:51:23 PM EDT
Instrument Type	steponeplus
Passive Reference	ROX
Well	Sample Name	Target Name	Task	Reporter	Quencher	Cт	Cт Mean	Cт SD	Quantity	Quantity Mean	Quantity SD	Automatic Ct Threshold	Ct Threshold	Automatic Baseline	Baseline Start	Baseline End	Comments	OUTLIERRG
A1																		N
A2																		N
A3																		N
A4																		N
A5																		N
A6																		N
A7																		N
A8																		N
A9																		N
A10																		N
A11																		N
A12																		N
B1	WT	Gapdh	UNKNOWN	FAM	NFQ-MGB	20.4221	20.5892	0.145863				FALSE	0.293838	TRUE	3	14		N
B2	WT	Gapdh	UNKNOWN	FAM	NFQ-MGB	20.6914	20.5892	0.145863				FALSE	0.293838	TRUE	3	15		N
B3	WT	Gapdh	UNKNOWN	FAM	NFQ-MGB	20.654	20.5892	0.145863				FALSE	0.293838	TRUE	3	15		N
B4	BP9KO	Gapdh	UNKNOWN	FAM	NFQ-MGB	20.8203	20.7375	0.076531				FALSE	0.293838	TRUE	3	15		N
B5	BP9KO	Gapdh	UNKNOWN	FAM	NFQ-MGB	20.6695	20.7375	0.076531				FALSE	0.293838	TRUE	3	15		N
B6	BP9KO	Gapdh	UNKNOWN	FAM	NFQ-MGB	20.7226	20.7375	0.076531				FALSE	0.293838	TRUE	3	15		N
B7	BP10KO	Gapdh	UNKNOWN	FAM	NFQ-MGB	20.8463	20.8006	0.0606381				FALSE	0.293838	TRUE	3	15		N
B8	BP10KO	Gapdh	UNKNOWN	FAM	NFQ-MGB	20.8237	20.8006	0.0606381				FALSE	0.293838	TRUE	3	15		N
B9	BP10KO	Gapdh	UNKNOWN	FAM	NFQ-MGB	20.7318	20.8006	0.0606381				FALSE	0.293838	TRUE	3	16		N
B10	DKO	Gapdh	UNKNOWN	FAM	NFQ-MGB	21.0512	21.0582	0.052841				FALSE	0.293838	TRUE	3	16		N
B11	DKO	Gapdh	UNKNOWN	FAM	NFQ-MGB	21.1141	21.0582	0.052841				FALSE	0.293838	TRUE	3	15		N
B12	DKO	Gapdh	UNKNOWN	FAM	NFQ-MGB	21.0092	21.0582	0.052841				FALSE	0.293838	TRUE	3	15		N
C1	WT	Armc8	UNKNOWN	FAM	NFQ-MGB	28.9018	28.8671	0.180006				FALSE	0.216106	TRUE	3	24		N
C2	WT	Armc8	UNKNOWN	FAM	NFQ-MGB	29.0272	28.8671	0.180006				FALSE	0.216106	TRUE	3	23		N
C3	WT	Armc8	UNKNOWN	FAM	NFQ-MGB	28.6723	28.8671	0.180006				FALSE	0.216106	TRUE	3	23		N
C4	BP9KO	Armc8	UNKNOWN	FAM	NFQ-MGB	28.5857	28.4384	0.177756				FALSE	0.216106	TRUE	3	24		N
C5	BP9KO	Armc8	UNKNOWN	FAM	NFQ-MGB	28.4884	28.4384	0.177756				FALSE	0.216106	TRUE	3	24		N
C6	BP9KO	Armc8	UNKNOWN	FAM	NFQ-MGB	28.2409	28.4384	0.177756				FALSE	0.216106	TRUE	3	23		N
C7	BP10KO	Armc8	UNKNOWN	FAM	NFQ-MGB	28.6053	28.8403	0.437427				FALSE	0.216106	TRUE	3	23		N
C8	BP10KO	Armc8	UNKNOWN	FAM	NFQ-MGB	28.5706	28.8403	0.437427				FALSE	0.216106	TRUE	3	24		N
C9	BP10KO	Armc8	UNKNOWN	FAM	NFQ-MGB	29.345	28.8403	0.437427				FALSE	0.216106	TRUE	3	24		N
C10	DKO	Armc8	UNKNOWN	FAM	NFQ-MGB	29.0122	29.002	0.105631				FALSE	0.216106	TRUE	3	24		N
C11	DKO	Armc8	UNKNOWN	FAM	NFQ-MGB	29.1022	29.002	0.105631				FALSE	0.216106	TRUE	3	24		N
C12	DKO	Armc8	UNKNOWN	FAM	NFQ-MGB	28.8917	29.002	0.105631				FALSE	0.216106	TRUE	3	24		N
D1	WT	Gid4	UNKNOWN	FAM	NFQ-MGB	29.2792	29.0848	0.168946				FALSE	0.206825	TRUE	3	24		N
D2	WT	Gid4	UNKNOWN	FAM	NFQ-MGB	29.0011	29.0848	0.168946				FALSE	0.206825	TRUE	3	24		N
D3	WT	Gid4	UNKNOWN	FAM	NFQ-MGB	28.974	29.0848	0.168946				FALSE	0.206825	TRUE	3	24		N
D4	BP9KO	Gid4	UNKNOWN	FAM	NFQ-MGB	28.4715	28.4626	0.0310866				FALSE	0.206825	TRUE	3	23		N
D5	BP9KO	Gid4	UNKNOWN	FAM	NFQ-MGB	28.428	28.4626	0.0310866				FALSE	0.206825	TRUE	3	24		N
D6	BP9KO	Gid4	UNKNOWN	FAM	NFQ-MGB	28.4882	28.4626	0.0310866				FALSE	0.206825	TRUE	3	23		N
D7	BP10KO	Gid4	UNKNOWN	FAM	NFQ-MGB	29.2446	29.1689	0.0752139				FALSE	0.206825	TRUE	3	24		N
D8	BP10KO	Gid4	UNKNOWN	FAM	NFQ-MGB	29.1679	29.1689	0.0752139				FALSE	0.206825	TRUE	3	25		N
D9	BP10KO	Gid4	UNKNOWN	FAM	NFQ-MGB	29.0942	29.1689	0.0752139				FALSE	0.206825	TRUE	3	24		N
D10	DKO	Gid4	UNKNOWN	FAM	NFQ-MGB	29.134	29.0908	0.0640529				FALSE	0.206825	TRUE	3	24		N
D11	DKO	Gid4	UNKNOWN	FAM	NFQ-MGB	29.0172	29.0908	0.0640529				FALSE	0.206825	TRUE	3	24		N
D12	DKO	Gid4	UNKNOWN	FAM	NFQ-MGB	29.1212	29.0908	0.0640529				FALSE	0.206825	TRUE	3	24		N
E1	WT	Maea	UNKNOWN	FAM	NFQ-MGB	28.1067	27.915	0.322906				FALSE	0.225803	TRUE	3	23		N
E2	WT	Maea	UNKNOWN	FAM	NFQ-MGB	28.0962	27.915	0.322906				FALSE	0.225803	TRUE	3	23		N
E3	WT	Maea	UNKNOWN	FAM	NFQ-MGB	27.5422	27.915	0.322906				FALSE	0.225803	TRUE	3	22		Y
E4	BP9KO	Maea	UNKNOWN	FAM	NFQ-MGB	27.8312	27.6908	0.174346				FALSE	0.225803	TRUE	3	22		N
E5	BP9KO	Maea	UNKNOWN	FAM	NFQ-MGB	27.4957	27.6908	0.174346				FALSE	0.225803	TRUE	3	22		N
E6	BP9KO	Maea	UNKNOWN	FAM	NFQ-MGB	27.7455	27.6908	0.174346				FALSE	0.225803	TRUE	3	23		N
E7	BP10KO	Maea	UNKNOWN	FAM	NFQ-MGB	28.2695	27.9407	0.285097				FALSE	0.225803	TRUE	3	23		N
E8	BP10KO	Maea	UNKNOWN	FAM	NFQ-MGB	27.7913	27.9407	0.285097				FALSE	0.225803	TRUE	3	22		N
E9	BP10KO	Maea	UNKNOWN	FAM	NFQ-MGB	27.7614	27.9407	0.285097				FALSE	0.225803	TRUE	3	22		N
E10	DKO	Maea	UNKNOWN	FAM	NFQ-MGB	27.9784	27.9594	0.0947356				FALSE	0.225803	TRUE	3	23		N
E11	DKO	Maea	UNKNOWN	FAM	NFQ-MGB	27.8566	27.9594	0.0947356				FALSE	0.225803	TRUE	3	23		N
E12	DKO	Maea	UNKNOWN	FAM	NFQ-MGB	28.0432	27.9594	0.0947356				FALSE	0.225803	TRUE	3	23		N
F1	WT	Mkln1	UNKNOWN	FAM	NFQ-MGB	27.5565	27.5035	0.0467038				FALSE	0.225803	TRUE	3	23		N
F2	WT	Mkln1	UNKNOWN	FAM	NFQ-MGB	27.4685	27.5035	0.0467038				FALSE	0.225803	TRUE	3	23		N
F3	WT	Mkln1	UNKNOWN	FAM	NFQ-MGB	27.4856	27.5035	0.0467038				FALSE	0.225803	TRUE	3	22		N
F4	BP9KO	Mkln1	UNKNOWN	FAM	NFQ-MGB	27.1587	27.156	0.0525538				FALSE	0.225803	TRUE	3	22		N
F5	BP9KO	Mkln1	UNKNOWN	FAM	NFQ-MGB	27.2072	27.156	0.0525538				FALSE	0.225803	TRUE	3	22		N
F6	BP9KO	Mkln1	UNKNOWN	FAM	NFQ-MGB	27.1022	27.156	0.0525538				FALSE	0.225803	TRUE	3	21		N
F7	BP10KO	Mkln1	UNKNOWN	FAM	NFQ-MGB	27.3196	27.1686	0.131417				FALSE	0.225803	TRUE	3	22		N
F8	BP10KO	Mkln1	UNKNOWN	FAM	NFQ-MGB	27.106	27.1686	0.131417				FALSE	0.225803	TRUE	3	22		N
F9	BP10KO	Mkln1	UNKNOWN	FAM	NFQ-MGB	27.0802	27.1686	0.131417				FALSE	0.225803	TRUE	3	22		N
F10	DKO	Mkln1	UNKNOWN	FAM	NFQ-MGB	27.8181	27.9405	0.11082				FALSE	0.225803	TRUE	3	23		N
F11	DKO	Mkln1	UNKNOWN	FAM	NFQ-MGB	28.034	27.9405	0.11082				FALSE	0.225803	TRUE	3	23		N
F12	DKO	Mkln1	UNKNOWN	FAM	NFQ-MGB	27.9693	27.9405	0.11082				FALSE	0.225803	TRUE	3	22		N
G1	WT	Rmnd5a	UNKNOWN	FAM	NFQ-MGB	29.3438	29.2559	0.0803729				FALSE	0.225803	TRUE	3	25		N
G2	WT	Rmnd5a	UNKNOWN	FAM	NFQ-MGB	29.238	29.2559	0.0803729				FALSE	0.225803	TRUE	3	24		N
G3	WT	Rmnd5a	UNKNOWN	FAM	NFQ-MGB	29.1861	29.2559	0.0803729				FALSE	0.225803	TRUE	3	25		N
G4	BP9KO	Rmnd5a	UNKNOWN	FAM	NFQ-MGB	29.8115	29.6169	0.212793				FALSE	0.225803	TRUE	3	25		N
G5	BP9KO	Rmnd5a	UNKNOWN	FAM	NFQ-MGB	29.6494	29.6169	0.212793				FALSE	0.225803	TRUE	3	25		N
G6	BP9KO	Rmnd5a	UNKNOWN	FAM	NFQ-MGB	29.3897	29.6169	0.212793				FALSE	0.225803	TRUE	3	24		N
G7	BP10KO	Rmnd5a	UNKNOWN	FAM	NFQ-MGB	29.2684	29.1855	0.0858833				FALSE	0.225803	TRUE	3	24		N
G8	BP10KO	Rmnd5a	UNKNOWN	FAM	NFQ-MGB	29.1912	29.1855	0.0858833				FALSE	0.225803	TRUE	3	24		N
G9	BP10KO	Rmnd5a	UNKNOWN	FAM	NFQ-MGB	29.0969	29.1855	0.0858833				FALSE	0.225803	TRUE	3	25		N
G10	DKO	Rmnd5a	UNKNOWN	FAM	NFQ-MGB	29.0216	28.9773	0.0390314				FALSE	0.225803	TRUE	3	24		N
G11	DKO	Rmnd5a	UNKNOWN	FAM	NFQ-MGB	28.9479	28.9773	0.0390314				FALSE	0.225803	TRUE	3	25		N
G12	DKO	Rmnd5a	UNKNOWN	FAM	NFQ-MGB	28.9623	28.9773	0.0390314				FALSE	0.225803	TRUE	3	24		N
H1																		N
H2																		N
H3																		N
H4																		N
H5																		N
H6																		N
H7																		N
H8																		N
H9																		N
H10																		N
H11																		N
H12																		N

## Sheet: 10-9-22_2
Block Type	96well
Chemistry	TAQMAN
Experiment File Name	C:\Applied Biosystems\StepOne Software v2.3\experiments\Coppola\Yasuko\A549KO10092022_2.eds
Experiment Run End Time	2022-10-09 17:56:50 PM EDT
Instrument Type	steponeplus
Passive Reference	ROX
Well	Sample Name	Target Name	Task	Reporter	Quencher	Cт	Cт Mean	Cт SD	Quantity	Quantity Mean	Quantity SD	Automatic Ct Threshold	Ct Threshold	Automatic Baseline	Baseline Start	Baseline End	Comments	HIGHSD	OUTLIERRG
A1																		N	N
A2																		N	N
A3																		N	N
A4																		N	N
A5																		N	N
A6																		N	N
A7																		N	N
A8																		N	N
A9																		N	N
A10																		N	N
A11																		N	N
A12																		N	N
B1	WT	Gapdh	UNKNOWN	FAM	NFQ-MGB	20.4976	20.6676	0.147289				FALSE	0.293838	TRUE	3	15		N	N
B2	WT	Gapdh	UNKNOWN	FAM	NFQ-MGB	20.7476	20.6676	0.147289				FALSE	0.293838	TRUE	3	15		N	N
B3	WT	Gapdh	UNKNOWN	FAM	NFQ-MGB	20.7576	20.6676	0.147289				FALSE	0.293838	TRUE	3	15		N	N
B4	BP9KO	Gapdh	UNKNOWN	FAM	NFQ-MGB	20.8737	20.7636	0.0991948				FALSE	0.293838	TRUE	3	15		N	N
B5	BP9KO	Gapdh	UNKNOWN	FAM	NFQ-MGB	20.6812	20.7636	0.0991948				FALSE	0.293838	TRUE	3	15		N	N
B6	BP9KO	Gapdh	UNKNOWN	FAM	NFQ-MGB	20.736	20.7636	0.0991948				FALSE	0.293838	TRUE	3	15		N	N
B7	BP10KO	Gapdh	UNKNOWN	FAM	NFQ-MGB	20.8647	20.7772	0.124582				FALSE	0.293838	TRUE	3	15		N	N
B8	BP10KO	Gapdh	UNKNOWN	FAM	NFQ-MGB	20.8324	20.7772	0.124582				FALSE	0.293838	TRUE	3	15		N	N
B9	BP10KO	Gapdh	UNKNOWN	FAM	NFQ-MGB	20.6346	20.7772	0.124582				FALSE	0.293838	TRUE	3	15		N	N
B10	DKO	Gapdh	UNKNOWN	FAM	NFQ-MGB	21.1196	21.1016	0.0619971				FALSE	0.293838	TRUE	3	16		N	N
B11	DKO	Gapdh	UNKNOWN	FAM	NFQ-MGB	21.1525	21.1016	0.0619971				FALSE	0.293838	TRUE	3	16		N	N
B12	DKO	Gapdh	UNKNOWN	FAM	NFQ-MGB	21.0326	21.1016	0.0619971				FALSE	0.293838	TRUE	3	15		N	N
C1	WT	Rmnd5b	UNKNOWN	FAM	NFQ-MGB	27.165	27.2299	0.152076				FALSE	0.197943	TRUE	3	22		N	N
C2	WT	Rmnd5b	UNKNOWN	FAM	NFQ-MGB	27.4037	27.2299	0.152076				FALSE	0.197943	TRUE	3	22		N	N
C3	WT	Rmnd5b	UNKNOWN	FAM	NFQ-MGB	27.1211	27.2299	0.152076				FALSE	0.197943	TRUE	3	23		N	N
C4	BP9KO	Rmnd5b	UNKNOWN	FAM	NFQ-MGB	27.8135	27.6454	0.183888				FALSE	0.197943	TRUE	3	23		N	N
C5	BP9KO	Rmnd5b	UNKNOWN	FAM	NFQ-MGB	27.6736	27.6454	0.183888				FALSE	0.197943	TRUE	3	23		N	N
C6	BP9KO	Rmnd5b	UNKNOWN	FAM	NFQ-MGB	27.449	27.6454	0.183888				FALSE	0.197943	TRUE	3	23		N	N
C7	BP10KO	Rmnd5b	UNKNOWN	FAM	NFQ-MGB	27.4494	27.7455	0.500136				FALSE	0.197943	TRUE	3	23		Y	N
C8	BP10KO	Rmnd5b	UNKNOWN	FAM	NFQ-MGB	27.464	27.7455	0.500136				FALSE	0.197943	TRUE	3	22		Y	N
C9	BP10KO	Rmnd5b	UNKNOWN	FAM	NFQ-MGB	28.3229	27.7455	0.500136				FALSE	0.197943	TRUE	3	23		Y	Y
C10	DKO	Rmnd5b	UNKNOWN	FAM	NFQ-MGB	27.6222	27.5694	0.0523935				FALSE	0.197943	TRUE	3	22		N	N
C11	DKO	Rmnd5b	UNKNOWN	FAM	NFQ-MGB	27.5174	27.5694	0.0523935				FALSE	0.197943	TRUE	3	22		N	N
C12	DKO	Rmnd5b	UNKNOWN	FAM	NFQ-MGB	27.5685	27.5694	0.0523935				FALSE	0.197943	TRUE	3	23		N	N
D1	WT	Wdr26	UNKNOWN	FAM	NFQ-MGB	27.6442	27.6719	0.0241364				FALSE	0.206825	TRUE	3	22		N	N
D2	WT	Wdr26	UNKNOWN	FAM	NFQ-MGB	27.6826	27.6719	0.0241364				FALSE	0.206825	TRUE	3	23		N	N
D3	WT	Wdr26	UNKNOWN	FAM	NFQ-MGB	27.6887	27.6719	0.0241364				FALSE	0.206825	TRUE	3	23		N	N
D4	BP9KO	Wdr26	UNKNOWN	FAM	NFQ-MGB	27.3179	27.3373	0.0179676				FALSE	0.206825	TRUE	3	22		N	N
D5	BP9KO	Wdr26	UNKNOWN	FAM	NFQ-MGB	27.3407	27.3373	0.0179676				FALSE	0.206825	TRUE	3	22		N	N
D6	BP9KO	Wdr26	UNKNOWN	FAM	NFQ-MGB	27.3534	27.3373	0.0179676				FALSE	0.206825	TRUE	3	22		N	N
D7	BP10KO	Wdr26	UNKNOWN	FAM	NFQ-MGB	27.492	27.4458	0.0630894				FALSE	0.206825	TRUE	3	22		N	N
D8	BP10KO	Wdr26	UNKNOWN	FAM	NFQ-MGB	27.4716	27.4458	0.0630894				FALSE	0.206825	TRUE	3	22		N	N
D9	BP10KO	Wdr26	UNKNOWN	FAM	NFQ-MGB	27.3739	27.4458	0.0630894				FALSE	0.206825	TRUE	3	22		N	N
D10	DKO	Wdr26	UNKNOWN	FAM	NFQ-MGB	27.4546	27.4473	0.034551				FALSE	0.206825	TRUE	3	22		N	N
D11	DKO	Wdr26	UNKNOWN	FAM	NFQ-MGB	27.4776	27.4473	0.034551				FALSE	0.206825	TRUE	3	23		N	N
D12	DKO	Wdr26	UNKNOWN	FAM	NFQ-MGB	27.4097	27.4473	0.034551				FALSE	0.206825	TRUE	3	22		N	N
E1	WT	Ypel5	UNKNOWN	FAM	NFQ-MGB	34.2299	34.0675	0.2461				FALSE	0.197943	TRUE	3	29		N	N
E2	WT	Ypel5	UNKNOWN	FAM	NFQ-MGB	34.1882	34.0675	0.2461				FALSE	0.197943	TRUE	3	29		N	N
E3	WT	Ypel5	UNKNOWN	FAM	NFQ-MGB	33.7843	34.0675	0.2461				FALSE	0.197943	TRUE	3	28		N	N
E4	BP9KO	Ypel5	UNKNOWN	FAM	NFQ-MGB	34.3446	34.1793	0.14845				FALSE	0.197943	TRUE	3	29		N	N
E5	BP9KO	Ypel5	UNKNOWN	FAM	NFQ-MGB	34.136	34.1793	0.14845				FALSE	0.197943	TRUE	3	29		N	N
E6	BP9KO	Ypel5	UNKNOWN	FAM	NFQ-MGB	34.0574	34.1793	0.14845				FALSE	0.197943	TRUE	3	29		N	N
E7	BP10KO	Ypel5	UNKNOWN	FAM	NFQ-MGB	35.5137	34.8931	0.559442				FALSE	0.197943	TRUE	3	30		Y	N
E8	BP10KO	Ypel5	UNKNOWN	FAM	NFQ-MGB	34.7381	34.8931	0.559442				FALSE	0.197943	TRUE	3	30		Y	N
E9	BP10KO	Ypel5	UNKNOWN	FAM	NFQ-MGB	34.4275	34.8931	0.559442				FALSE	0.197943	TRUE	3	29		Y	N
E10	DKO	Ypel5	UNKNOWN	FAM	NFQ-MGB	34.1177	33.912	0.184253				FALSE	0.197943	TRUE	3	29		N	N
E11	DKO	Ypel5	UNKNOWN	FAM	NFQ-MGB	33.8562	33.912	0.184253				FALSE	0.197943	TRUE	3	29		N	N
E12	DKO	Ypel5	UNKNOWN	FAM	NFQ-MGB	33.7621	33.912	0.184253				FALSE	0.197943	TRUE	3	29		N	N
F1																		N	N
F2																		N	N
F3																		N	N
F4																		N	N
F5																		N	N
F6																		N	N
F7																		N	N
F8																		N	N
F9																		N	N
F10																		N	N
F11																		N	N
F12																		N	N
G1																		N	N
G2																		N	N
G3																		N	N
G4																		N	N
G5																		N	N
G6																		N	N
G7																		N	N
G8																		N	N
G9																		N	N
G10																		N	N
G11																		N	N
G12																		N	N
H1																		N	N
H2																		N	N
H3																		N	N
H4																		N	N
H5																		N	N
H6																		N	N
H7																		N	N
H8																		N	N
H9																		N	N
H10																		N	N
H11																		N	N
H12																		N	N
