# Supplementary material for: RANBP9 and RANBP10 cooperate in regulating non-small cell lung cancer proliferation
Source: J Exp Clin Cancer Res. 2025 Aug 29;44:259. doi: 10.1186/s13046-025-03491-8 (PMC12395873; doi:10.1186/s13046-025-03491-8)
Supplement: Supplementary file 16 — Supplementary Material 16. [file 13046_2025_3491_MOESM16_ESM.xlsx]

## Sheet: DKO inducibles  (for figure)
		WT-	WT+	DKO+	DKO iGFP-	DKO iGFP+	DKO iBP9-	DKO iBP9+	DKO iBP10-	DKO iBP10+			RanBP9	WT-	WT+	DKO+	DKO iGFP-	DKO iGFP+	DKO iBP9-	DKO iBP9+	DKO iBP10-	DKO iBP10+			RanBP9	WT-	WT+	DKO+	DKO iGFP-	DKO iGFP+	DKO iBP9-	DKO iBP9+	DKO iBP10-	DKO iBP10+
2022-08-12	RanBP9	1	1.06	0.001	0.001	0.001	0.001	1.23	0.001	0.001			2022-08-12	1	1.07071	0.00049505	0.000793651	0.000724638	0.000819672	1.07895	0.000571429	0.000699301			2022-08-12	1	1.07071	1	1	0.913043	1	1316.32	1	1.22378
	Vinculin	1	0.99	2.02	1.26	1.38	1.22	1.14	1.75	1.43			2022-09-13	1	0.871287	0.000970874	0.000892857	0.000900901	0.000961538	1.2551	0.000952381	0.00116279			2022-09-13	1	0.871287	1	1	1.00901	1	1305.31	1	1.22093
	RanBP9	1	1.07071	0.00049505	0.000793651	0.000724638	0.000819672	1.07895	0.000571429	0.000699301			2022-09-20	1	0.907407	0.000813008	0.000787402	0.000877193	0.000877193	1.60163	0.000763359	0.000775194			2022-09-20	1	0.907407	1	1	1.11404	1	1825.85	1	1.0155
	RanBP9	1	1.07071	1	1	0.913043	1	1316.32	1	1.22378			Average	1	0.949801	0.000759644	0.000824637	0.000834244	0.000886135	1.31189	0.000762389	0.000879095			Average	1	0.949801	1	1	1.01203	1	1482.49	1	1.1534
													SD	0	0.106254	0.000242359	5.91634e-05	9.5659e-05	7.13546e-05	0.265927	0.000190478	0.000248601			SD	0	0.106254	0	0	0.10053	0	297.411	0	0.119433
		WT-	WT+	DKO+	DKO iGFP-	DKO iGFP+	DKO iBP9-	DKO iBP9+	DKO iBP10-	DKO iBP10+			T.TEST	0.249586			0.445443		0.00671954		0.278018				T.TEST	0.249586			0.427499		0.00658444		0.0780401
2022-09-13	RanBP9	1	0.88	0.001	0.001	0.001	0.001	1.23	0.001	0.001
	Vinculin	1	1.01	1.03	1.12	1.11	1.04	0.98	1.05	0.86			For graph												For graph
	RanBP9	1	0.871287	0.000970874	0.000892857	0.000900901	0.000961538	1.2551	0.000952381	0.00116279				Doxy -	Doxy +	SD-	SD+									Doxy -	Doxy +	SD-	SD+
	RanBP9	1	0.871287	1	1	1.00901	1	1305.31	1	1.22093			WT	1	0.949801	0	0.106254								WT	1	0.949801	0	0.106254
													DKO		0.000759644		0.000242359								DKO iGFP	1	1.01203	0	0.10053
		WT-	WT+	DKO+	DKO iGFP-	DKO iGFP+	DKO iBP9-	DKO iBP9+	DKO iBP10-	DKO iBP10+			DKO iGFP	0.000824637	0.000834244	5.91634e-05	9.5659e-05								DKO iBP9	1	1482.49	0	297.411
2022-09-20	RanBP9	1	0.98	0.001	0.001	0.001	0.001	1.97	0.001	0.001			DKO iBP9	0.000886135	1.31189	7.13546e-05	0.265927								DKO iBP10	1	1.1534	0	0.119433
	Vinculin	1	1.08	1.23	1.27	1.14	1.14	1.23	1.31	1.29			DKO iBP10	0.000762389	0.000879095	0.000190478	0.000248601
	RanBP9	1	0.907407	0.000813008	0.000787402	0.000877193	0.000877193	1.60163	0.000763359	0.000775194
	RanBP9	1	0.907407	1	1	1.11404	1	1825.85	1	1.0155
		WT-	WT+	DKO+	DKO iGFP-	DKO iGFP+	DKO iBP9-	DKO iBP9+	DKO iBP10-	DKO iBP10+			RanBP10	WT-	WT+	DKO+	DKO iGFP-	DKO iGFP+	DKO iBP9-	DKO iBP9+	DKO iBP10-	DKO iBP10+			RanBP10	WT-	WT+	DKO+	DKO iGFP-	DKO iGFP+	DKO iBP9-	DKO iBP9+	DKO iBP10-	DKO iBP10+
2022-08-23	RanBP10	1	0.94	0.001	0.001	0.001	0.001	0.001	0.001	7.84			2022-08-23	1	0.810345	0.000813008	0.000806452	0.000840336	0.001	0.000925926	0.000543478	5.76471			2022-08-23	1	0.810345	1	1	1.04202	1	0.925926	1	10607.1
	Vinculin	1	1.16	1.23	1.24	1.19	1	1.08	1.84	1.36			2022-09-15	1	1.125	0.000877193	0.000819672	0.000925926	0.0010989	0.000884956	0.000729927	4.81301			2022-09-15	1	1.125	1	1	1.12963	1	0.80531	1	6593.82
	RanBP10	1	0.810345	0.000813008	0.000806452	0.000840336	0.001	0.000925926	0.000543478	5.76471			2022-09-20	1	1.30841	0.00070922	0.000704225	0.0008	0.000892857	0.000877193	0.000694444	6			2022-09-20	1	1.30841	1	1	1.136	1	0.982456	1	8640
	RanBP10	1	0.810345	1	1	1.04202	1	0.925926	1	10607.1			Average	1	1.08125	0.000799807	0.000776783	0.000855421	0.000997253	0.000896025	0.00065595	5.5259			Average	1	1.08125	1	1	1.10255	1	0.904564	1	8613.63
													SD	0	0.251899	8.47611e-05	6.31835e-05	6.43039e-05	0.000103049	2.61843e-05	9.90058e-05	0.628496			SD	0	0.251899	0	0	0.0525189	0	0.0904846	0	2006.75
		WT-	WT+	DKO+	DKO iGFP-	DKO iGFP+	DKO iBP9-	DKO iBP9+	DKO iBP10-	DKO iBP10+			T.TEST	0.31629			0.102686		0.113313		0.00214265				T.TEST	0.31629			0.038706		0.104627		0.0088098
2022-09-15	RanBP10	1	1.08	0.001	0.001	0.001	0.001	0.001	0.001	5.92
	Vinculin	1	0.96	1.14	1.22	1.08	0.91	1.13	1.37	1.23			For graph												For graph
	RanBP10	1	1.125	0.000877193	0.000819672	0.000925926	0.0010989	0.000884956	0.000729927	4.81301				Doxy -	Doxy +	SD-	SD+									Doxy -	Doxy +	SD-	SD+
	RanBP10	1	1.125	1	1	1.12963	1	0.80531	1	6593.82			WT	1	1.08125	0	0.251899								WT	1	1.08125	0	0.251899
													DKO		0.000799807		8.47611e-05								DKO iGFP	1	1.10255	0	0.0525189
		WT-	WT+	DKO+	DKO iGFP-	DKO iGFP+	DKO iBP9-	DKO iBP9+	DKO iBP10-	DKO iBP10+			DKO iGFP	0.000776783	0.000855421	6.31835e-05	6.43039e-05								DKO iBP9	1	0.904564	0	0.0904846
2022-09-20	RanBP10	1	1.4	0.001	0.001	0.001	0.001	0.001	0.001	8.16			DKO iBP9	0.000997253	0.000896025	0.000103049	2.61843e-05								DKO iBP10	1	8613.63	0	2006.75
	Vinculin	1	1.07	1.41	1.42	1.25	1.12	1.14	1.44	1.36			DKO iBP10	0.00065595	5.5259	9.90058e-05	0.628496
	RanBP10	1	1.30841	0.00070922	0.000704225	0.0008	0.000892857	0.000877193	0.000694444	6
	RanBP10	1	1.30841	1	1	1.136	1	0.982456	1	8640
		WT-	WT+	DKO+	DKO iGFP-	DKO iGFP+	DKO iBP9-	DKO iBP9+	DKO iBP10-	DKO iBP10+			GID8	WT-	WT+	DKO+	DKO iGFP-	DKO iGFP+	DKO iBP9-	DKO iBP9+	DKO iBP10-	DKO iBP10+			GID8	WT-	WT+	DKO+	DKO iGFP-	DKO iGFP+	DKO iBP9-	DKO iBP9+	DKO iBP10-	DKO iBP10+
2022-08-23	GID8	1	0.92	0.04	0.07	0.06	0.04	0.47	0.05	0.99			2022-08-23	1	0.793103	0.0325203	0.0564516	0.0504202	0.04	0.435185	0.0271739	0.727941			2022-08-23	1	0.793103	1	1	0.893157	1	10.8796	1	26.7882
	Vinculin	1	1.16	1.23	1.24	1.19	1	1.08	1.84	1.36			2022-09-15	1	1.33333	0.00877193	0.00819672	0.00925926	0.021978	0.973451	0.0145985	0.780488			2022-09-15	1	1.33333	1	1	1.12963	1	44.292	1	53.4634
	GID8	1	0.793103	0.0325203	0.0564516	0.0504202	0.04	0.435185	0.0271739	0.727941			2022-09-20	1	0.990654	0.00070922	0.0211268	0.008	0.0267857	0.710526	0.00694444	0.580882			2022-09-20	1	0.990654	1	1	0.378667	1	26.5263	1	83.6471
	GID8	1	0.793103	1	1	0.893157	1	10.8796	1	26.7882			Average	1	1.03903	0.0140005	0.0285917	0.0225598	0.0295879	0.706388	0.016239	0.696437			Average	1	1.03903	1	1	0.800485	1	27.2327	1	54.6329
													SD	0	0.273345	0.0165375	0.0249785	0.024136	0.00933205	0.269157	0.010214	0.103465			SD	0	0.273345	0	0	0.383963	0	16.7174	0	28.4474
		WT-	WT+	DKO+	DKO iGFP-	DKO iGFP+	DKO iBP9-	DKO iBP9+	DKO iBP10-	DKO iBP10+			T.TEST	0.413868			0.389291		0.0243648		0.00359083				T.TEST	0.413868			0.23155		0.0564519		0.0411795
2022-09-15	GID8	1	1.28	0.01	0.01	0.01	0.02	1.1	0.02	0.96
	Vinculin	1	0.96	1.14	1.22	1.08	0.91	1.13	1.37	1.23			For graph												For graph
	GID8	1	1.33333	0.00877193	0.00819672	0.00925926	0.021978	0.973451	0.0145985	0.780488				Doxy -	Doxy +	SD-	SD+									Doxy -	Doxy +	SD-	SD+
	GID8	1	1.33333	1	1	1.12963	1	44.292	1	53.4634			WT	1	1.03903	0	0.273345								WT	1	1.03903	0	0.273345
													DKO		0.0140005		0.0165375								DKO iGFP	1	0.800485	0	0.383963
		WT-	WT+	DKO+	DKO iGFP-	DKO iGFP+	DKO iBP9-	DKO iBP9+	DKO iBP10-	DKO iBP10+			DKO iGFP	0.0285917	0.0225598	0.0249785	0.024136								DKO iBP9	1	27.2327	0	16.7174
2022-09-20	GID8	1	1.06	0.001	0.03	0.01	0.03	0.81	0.01	0.79			DKO iBP9	0.0295879	0.706388	0.00933205	0.269157								DKO iBP10	1	54.6329	0	28.4474
	Vinculin	1	1.07	1.41	1.42	1.25	1.12	1.14	1.44	1.36			DKO iBP10	0.016239	0.696437	0.010214	0.103465
	GID8	1	0.990654	0.00070922	0.0211268	0.008	0.0267857	0.710526	0.00694444	0.580882
	GID8	1	0.990654	1	1	0.378667	1	26.5263	1	83.6471
		WT-	WT+	DKO+	DKO iGFP-	DKO iGFP+	DKO iBP9-	DKO iBP9+	DKO iBP10-	DKO iBP10+			MAEA	WT-	WT+	DKO+	DKO iGFP-	DKO iGFP+	DKO iBP9-	DKO iBP9+	DKO iBP10-	DKO iBP10+			MAEA	WT-	WT+	DKO+	DKO iGFP-	DKO iGFP+	DKO iBP9-	DKO iBP9+	DKO iBP10-	DKO iBP10+
2022-08-12	MAEA	1	0.93	0.11	0.11	0.12	0.1	0.56	0.38	0.79			2022-08-12	1	0.939394	0.0544554	0.0873016	0.0869565	0.0819672	0.491228	0.217143	0.552448			2022-08-12	1	0.939394	1	1	0.996047	1	5.99298	1	2.54417
	Vinculin	1	0.99	2.02	1.26	1.38	1.22	1.14	1.75	1.43			2022-09-13	1	0.881188	0.0873786	0.169643	0.108108	0.230769	0.755102	0.133333	0.639535			2022-09-13	1	0.881188	1	1	0.637269	1	3.27211	1	4.79651
	MAEA	1	0.939394	0.0544554	0.0873016	0.0869565	0.0819672	0.491228	0.217143	0.552448			2022-09-20	1	0.805556	0.0162602	0.015748	0.00877193	0.0877193	0.430894	0.114504	0.488372			2022-09-20	1	0.805556	1	1	0.557018	1	4.9122	1	4.26512
	MAEA	1	0.939394	1	1	0.996047	1	5.99298	1	2.54417			Average	1	0.875379	0.0526981	0.0908975	0.0679455	0.133485	0.559075	0.154993	0.560118			Average	1	0.875379	1	1	0.730111	1	4.72576	1	3.8686
													SD	0	0.067108	0.0355918	0.0770104	0.0523257	0.0842995	0.172424	0.0546403	0.0758728			SD	0	0.067108	0	0	0.233777	0	1.36998	0	1.17736
		WT-	WT+	DKO+	DKO iGFP-	DKO iGFP+	DKO iBP9-	DKO iBP9+	DKO iBP10-	DKO iBP10+			T.TEST	0.0422888			0.347089		0.0164819		0.00122301				T.TEST	0.0422888			0.0917787		0.0211172		0.0259125
2022-09-13	MAEA	1	0.89	0.09	0.19	0.12	0.24	0.74	0.14	0.55
	Vinculin	1	1.01	1.03	1.12	1.11	1.04	0.98	1.05	0.86			For graph												For graph
	MAEA	1	0.881188	0.0873786	0.169643	0.108108	0.230769	0.755102	0.133333	0.639535				Doxy -	Doxy +	SD-	SD+									Doxy -	Doxy +	SD-	SD+
	MAEA	1	0.881188	1	1	0.637269	1	3.27211	1	4.79651			WT	1	0.875379	0	0.067108								WT	1	0.875379	0	0.067108
													DKO		0.0526981		0.0355918								DKO iGFP	1	0.730111	0	0.233777
		WT-	WT+	DKO+	DKO iGFP-	DKO iGFP+	DKO iBP9-	DKO iBP9+	DKO iBP10-	DKO iBP10+			DKO iGFP	0.0908975	0.0679455	0.0770104	0.0523257								DKO iBP9	1	4.72576	0	1.36998
2022-09-20	MAEA	1	0.87	0.02	0.02	0.01	0.1	0.53	0.15	0.63			DKO iBP9	0.133485	0.559075	0.0842995	0.172424								DKO iBP10	1	3.8686	0	1.17736
	Vinculin	1	1.08	1.23	1.27	1.14	1.14	1.23	1.31	1.29			DKO iBP10	0.154993	0.560118	0.0546403	0.0758728
	MAEA	1	0.805556	0.0162602	0.015748	0.00877193	0.0877193	0.430894	0.114504	0.488372
	MAEA	1	0.805556	1	1	0.557018	1	4.9122	1	4.26512
		WT-	WT+	DKO+	DKO iGFP-	DKO iGFP+	DKO iBP9-	DKO iBP9+	DKO iBP10-	DKO iBP10+			MKLN1	WT-	WT+	DKO+	DKO iGFP-	DKO iGFP+	DKO iBP9-	DKO iBP9+	DKO iBP10-	DKO iBP10+			MKLN1	WT-	WT+	DKO+	DKO iGFP-	DKO iGFP+	DKO iBP9-	DKO iBP9+	DKO iBP10-	DKO iBP10+
2022-08-25	MKLN1	1	0.92	2.33	2.54	2.44	2.07	1.25	1.46	0.5			2022-08-25	1	0.867925	2.11818	2.35185	2.4898	2.65385	1.66667	1.31532	0.581395			2022-08-25	1	0.867925	1	1	1.05865	1	0.628019	1	0.44202
	Vinculin	1	1.06	1.1	1.08	0.98	0.78	0.75	1.11	0.86			2022-10-16	1	0.93617	1.68142	1.95575	2.01852	2.85227	1.12745	1.14286	0.654867			2022-10-16	1	0.93617	1	1	1.03209	1	0.395282	1	0.573009
	MKLN1	1	0.867925	2.11818	2.35185	2.4898	2.65385	1.66667	1.31532	0.581395			2022-10-19	1	1.25	1.56897	1.66087	1.55462	1.6	0.625	0.672269	0.303571			2022-10-19	1	1.25	1	1	0.936029	1	0.390625	1	0.451562
	MKLN1	1	0.867925	1	1	1.05865	1	0.628019	1	0.44202			Average	1	1.01803	1.78952	1.98949	2.02098	2.36871	1.13971	1.04348	0.513278			Average	1	1.01803	1	1	1.00893	1	0.471309	1	0.488864
													SD	0	0.203768	0.290129	0.346724	0.467592	0.673072	0.520941	0.332842	0.185289			SD	0	0.203768	0	0	0.0645117	0	0.135735	0	0.0730279
		WT-	WT+	DKO+	DKO iGFP-	DKO iGFP+	DKO iBP9-	DKO iBP9+	DKO iBP10-	DKO iBP10+			T.TEST	0.446126			0.465111		0.035304		0.0456785				T.TEST	0.446126			0.416469		0.0106365		0.00336781
2022-10-16	MKLN1	1	0.88	1.9	2.21	2.18	2.51	1.15	1.36	0.74
	Vinculin	1	0.94	1.13	1.13	1.08	0.88	1.02	1.19	1.13			For graph												For graph
	MKLN1	1	0.93617	1.68142	1.95575	2.01852	2.85227	1.12745	1.14286	0.654867				Doxy -	Doxy +	SD-	SD+									Doxy -	Doxy +	SD-	SD+
	MKLN1	1	0.93617	1	1	1.03209	1	0.395282	1	0.573009			WT	1	1.01803	0	0.203768								WT	1	1.01803	0	0.203768
													DKO		1.78952		0.290129								DKO iGFP	1	1.00893	0	0.0645117
		WT-	WT+	DKO+	DKO iGFP-	DKO iGFP+	DKO iBP9-	DKO iBP9+	DKO iBP10-	DKO iBP10+			DKO iGFP	1.98949	2.02098	0.346724	0.467592								DKO iBP9	1	0.471309	0	0.135735
2022-10-19	MKLN1	1	1.1	1.82	1.91	1.85	1.28	0.55	0.8	0.34			DKO iBP9	2.36871	1.13971	0.673072	0.520941								DKO iBP10	1	0.488864	0	0.0730279
	Vinculin	1	0.88	1.16	1.15	1.19	0.8	0.88	1.19	1.12			DKO iBP10	1.04348	0.513278	0.332842	0.185289
	MKLN1	1	1.25	1.56897	1.66087	1.55462	1.6	0.625	0.672269	0.303571
	MKLN1	1	1.25	1	1	0.936029	1	0.390625	1	0.451562
		WT-	WT+	DKO+	DKO iGFP-	DKO iGFP+	DKO iBP9-	DKO iBP9+	DKO iBP10-	DKO iBP10+			WDR26	WT-	WT+	DKO+	DKO iGFP-	DKO iGFP+	DKO iBP9-	DKO iBP9+	DKO iBP10-	DKO iBP10+			WDR26	WT-	WT+	DKO+	DKO iGFP-	DKO iGFP+	DKO iBP9-	DKO iBP9+	DKO iBP10-	DKO iBP10+
2022-09-07	WDR26	1	1.06	1.01	1.53	1.59	1.64	1.81	1.31	1.58			2022-09-07	1	1.01923	1.01	1.4434	1.57426	1.9759	2.35065	1.59756	1.49057			2022-09-07	1	1.01923	1	1	1.09066	1	1.18966	1	0.933026
	Vinculin	1	1.04	1	1.06	1.01	0.83	0.77	0.82	1.06			2022-10-16	1	0.96875	1.13889	1.5	1.67647	1.31343	1.91589	2.07865	1.87288			2022-10-16	1	0.96875	1	1	1.11765	1	1.45869	1	0.901008
	WDR26	1	1.01923	1.01	1.4434	1.57426	1.9759	2.35065	1.59756	1.49057			2022-10-18	1	0.960396	1.06481	1.30631	1.34259	1.43434	1.73786	1.21368	1.34234			2022-10-18	1	0.960396	1	1	1.02778	1	1.21161	1	1.10601
	WDR26	1	1.01923	1	1	1.09066	1	1.18966	1	0.933026			Average	1	0.982792	1.07123	1.41657	1.53111	1.57456	2.00147	1.62996	1.5686			Average	1	0.982792	1	1	1.0787	1	1.28665	1	0.980016
													SD	0	0.0318319	0.0646838	0.0995949	0.17107	0.352792	0.315229	0.433398	0.273742			SD	0	0.0318319	0	0	0.0461142	0	0.149391	0	0.110286
		WT-	WT+	DKO+	DKO iGFP-	DKO iGFP+	DKO iBP9-	DKO iBP9+	DKO iBP10-	DKO iBP10+			T.TEST	0.223977			0.192785		0.0969974		0.423812				T.TEST	0.223977			0.0489664		0.0399215		0.391673
2022-10-16	WDR26	1	0.93	1.23	1.62	1.71	1.76	2.05	1.85	2.21
	Vinculin	1	0.96	1.08	1.08	1.02	1.34	1.07	0.89	1.18			For graph												For graph
	WDR26	1	0.96875	1.13889	1.5	1.67647	1.31343	1.91589	2.07865	1.87288				Doxy -	Doxy +	SD-	SD+									Doxy -	Doxy +	SD-	SD+
	WDR26	1	0.96875	1	1	1.11765	1	1.45869	1	0.901008			WT	1	0.982792	0	0.0318319								WT	1	0.982792	0	0.0318319
													DKO		1.07123		0.0646838								DKO iGFP	1	1.0787	0	0.0461142
		WT-	WT+	DKO+	DKO iGFP-	DKO iGFP+	DKO iBP9-	DKO iBP9+	DKO iBP10-	DKO iBP10+			DKO iGFP	1.41657	1.53111	0.0995949	0.17107								DKO iBP9	1	1.28665	0	0.149391
2022-10-18	WDR26	1	0.97	1.15	1.45	1.45	1.42	1.79	1.42	1.49			DKO iBP9	1.57456	2.00147	0.352792	0.315229								DKO iBP10	1	0.980016	0	0.110286
	Vinculin	1	1.01	1.08	1.11	1.08	0.99	1.03	1.17	1.11			DKO iBP10	1.62996	1.5686	0.433398	0.273742
	WDR26	1	0.960396	1.06481	1.30631	1.34259	1.43434	1.73786	1.21368	1.34234
	WDR26	1	0.960396	1	1	1.02778	1	1.21161	1	1.10601
		WT-	WT+	DKO+	DKO iGFP-	DKO iGFP+	DKO iBP9-	DKO iBP9+	DKO iBP10-	DKO iBP10+			ARMC8	WT-	WT+	DKO+	DKO iGFP-	DKO iGFP+	DKO iBP9-	DKO iBP9+	DKO iBP10-	DKO iBP10+			ARMC8	WT-	WT+	DKO+	DKO iGFP-	DKO iGFP+	DKO iBP9-	DKO iBP9+	DKO iBP10-	DKO iBP10+
2022-09-13	ARMC8	1	0.99	0.38	0.94	0.93	1.04	1.2	0.58	0.65			2022-09-13	1	0.933962	0.365385	0.614379	0.641379	0.8	0.740741	0.411348	0.570175			2022-09-13	1	0.933962	1	1	1.04395	1	0.925926	1	1.38612
	Vinculin	1	1.06	1.04	1.53	1.45	1.3	1.62	1.41	1.14			2022-10-18	1	1.05319	0.491667	0.644068	0.745283	0.861702	0.960396	0.606557	0.633333			2022-10-18	1	1.05319	1	1	1.15715	1	1.11453	1	1.04414
	ARMC8	1	0.933962	0.365385	0.614379	0.641379	0.8	0.740741	0.411348	0.570175			2022-10-19	1	0.989899	0.457944	0.679612	0.708333	0.82716	0.953488	0.466667	0.581633			2022-10-19	1	0.989899	1	1	1.04226	1	1.15272	1	1.24636
	ARMC8	1	0.933962	1	1	1.04395	1	0.925926	1	1.38612			Average	1	0.992351	0.438332	0.64602	0.698332	0.829621	0.884875	0.494857	0.595047			Average	1	0.992351	1	1	1.08112	1	1.06439	1	1.22554
													SD	0	0.0596524	0.0653855	0.03266	0.0526689	0.0309246	0.124872	0.100612	0.0336481			SD	0	0.0596524	0	0	0.0658495	0	0.121428	0	0.171934
		WT-	WT+	DKO+	DKO iGFP-	DKO iGFP+	DKO iBP9-	DKO iBP9+	DKO iBP10-	DKO iBP10+			T.TEST	0.422428			0.115466		0.263498		0.110328				T.TEST	0.422428			0.0832321		0.227655		0.0755124
2022-10-18	ARMC8	1	0.99	0.59	0.76	0.79	0.81	0.97	0.74	0.76
	Vinculin	1	0.94	1.2	1.18	1.06	0.94	1.01	1.22	1.2			For graph												For graph
	ARMC8	1	1.05319	0.491667	0.644068	0.745283	0.861702	0.960396	0.606557	0.633333				Doxy -	Doxy +	SD-	SD+									Doxy -	Doxy +	SD-	SD+
	ARMC8	1	1.05319	1	1	1.15715	1	1.11453	1	1.04414			WT	1	0.992351	0	0.0596524								WT	1	0.992351	0	0.0596524
													DKO		0.438332		0.0653855								DKO iGFP	1	1.08112	0	0.0658495
		WT-	WT+	DKO+	DKO iGFP-	DKO iGFP+	DKO iBP9-	DKO iBP9+	DKO iBP10-	DKO iBP10+			DKO iGFP	0.64602	0.698332	0.03266	0.0526689								DKO iBP9	1	1.06439	0	0.121428
2022-10-19	ARMC8	1	0.98	0.49	0.7	0.68	0.67	0.82	0.49	0.57			DKO iBP9	0.829621	0.884875	0.0309246	0.124872								DKO iBP10	1	1.22554	0	0.171934
	Vinculin	1	0.99	1.07	1.03	0.96	0.81	0.86	1.05	0.98			DKO iBP10	0.494857	0.595047	0.100612	0.0336481
	ARMC8	1	0.989899	0.457944	0.679612	0.708333	0.82716	0.953488	0.466667	0.581633
	ARMC8	1	0.989899	1	1	1.04226	1	1.15272	1	1.24636
