# Supplementary material for: RANBP9 and RANBP10 cooperate in regulating non-small cell lung cancer proliferation
Source: J Exp Clin Cancer Res. 2025 Aug 29;44:259. doi: 10.1186/s13046-025-03491-8 (PMC12395873; doi:10.1186/s13046-025-03491-8)
Supplement: Supplementary file 17 — Supplementary Material 17. [file 13046_2025_3491_MOESM17_ESM.xlsx]

## Sheet: WT inducibles
		WT-	WT+	WT iBP9-	WT iBP9+	WT iBP10-	WT iBP10+	DKO-	DKO+			RanBP9	WT iBP9-	WT iBP9+	WT iBP10-	WT iBP10+				RanBP9	WT iBP9-	WT iBP9+	WT iBP10-	WT iBP10+
2022-08-21	RanBP9	1	1	1.24	7.13	1.3	0.5	0.001	0.001			2022-08-21	0.708571	3.71354	1.19266	0.510204				2022-08-21	1	5.24089	1	0.427786
	Vinculin	1	1.2	1.75	1.92	1.09	0.98	2.73	2.63			2022-09-15	0.973214	9.25472	2.29293	1.26168				2022-09-15	1	9.50943	1	0.550249
	RanBP9	1	0.833333	0.708571	3.71354	1.19266	0.510204	0.001	0.001			2022-09-20	0.813559	10.2477	1.72897	0.866667				2022-09-20	1	12.5961	1	0.501261
	RanBP9	1	0.833333	1	5.24089	1	0.427786	1	1			Average	0.831782	7.73866	1.73819	0.879518				Average	1	9.11549	1	0.493099
												SD	0.133259	3.52103	0.550192	0.375904				SD	0	3.69342	0	0.061638
		WT-	WT+	WT iBP9-	WT iBP9+	WT iBP10-	WT iBP10+	DKO-	DKO+			T.TEST	0.0382876		0.0491535					T.TEST	0.0313126		0.00244626
2022-09-15	RanBP9	1	1.28	1.09	9.81	2.27	1.35	0.001	0.001
	Vinculin	1	1.07	1.12	1.06	0.99	1.07	1.25	1.15
	RanBP9	1	1.19626	0.973214	9.25472	2.29293	1.26168	0.001	0.001
	RanBP9	1	1.19626	1	9.50943	1	0.550249	1	1
		WT-	WT+	WT iBP9-	WT iBP9+	WT iBP10-	WT iBP10+	DKO-	DKO+
2022-09-20	RanBP9	1	1.25	0.96	11.17	1.85	1.04	0.001	0.001
	Vinculin	1	1.05	1.18	1.09	1.07	1.2	1.19	1.12
	RanBP9	1	1.19048	0.813559	10.2477	1.72897	0.866667	0.001	0.001
	RanBP9	1	1.19048	1	12.5961	1	0.501261	1	1
		WT-	WT+	WT iBP9-	WT iBP9+	WT iBP10-	WT iBP10+	DKO-	DKO+			RanBP10	WT iBP9-	WT iBP9+	WT iBP10-	WT iBP10+				RanBP10	WT iBP9-	WT iBP9+	WT iBP10-	WT iBP10+
2022-08-23	RanBP10	1	1.05	0.71	0.23	1.47	5.22	0.001	0.001			2022-08-23	0.739583	0.234694	1.88462	7.05405				2022-08-23	1	0.317333	1	3.74297
	Vinculin	1	0.99	0.96	0.98	0.78	0.74	1.14	1.17			2022-09-13	0.473684	0.0992908	0.903226	6.36994				2022-09-13	1	0.209614	1	7.05244
	RanBP10	1	1.06061	0.739583	0.234694	1.88462	7.05405	0.001	0.001			2022-09-20	0.87069	0.0535714	2.06742	13.9346				2022-09-20	1	0.0615276	1	6.7401
	RanBP10	1	1.06061	1	0.317333	1	3.74297	1	1			Average	0.694652	0.129185	1.61842	9.11953				Average	1	0.196158	1	5.84517
												SD	0.202281	0.0941892	0.626083	4.18396				SD	0	0.128432	0	1.82724
		WT-	WT+	WT iBP9-	WT iBP9+	WT iBP10-	WT iBP10+	DKO-	DKO+			T.TEST	0.0123624		0.0434086					T.TEST	0.00420102		0.0221415
2022-09-13	RanBP10	1	1.12	0.63	0.14	1.4	11.02	0.001	0.001
	Vinculin	1	1.09	1.33	1.41	1.55	1.73	1.64	1
	RanBP10	1	1.02752	0.473684	0.0992908	0.903226	6.36994	0.001	0.001
	RanBP10	1	1.02752	1	0.209614	1	7.05244	1	1
		WT-	WT+	WT iBP9-	WT iBP9+	WT iBP10-	WT iBP10+	DKO-	DKO+
2022-09-20	RanBP10	1	1.62	1.01	0.06	1.84	14.91	0.001	0.001
	Vinculin	1	0.96	1.16	1.12	0.89	1.07	1.45	1.29
	RanBP10	1	1.6875	0.87069	0.0535714	2.06742	13.9346	0.001	0.001
	RanBP10	1	1.6875	1	0.0615276	1	6.7401	1	1
		WT-	WT+	WT iBP9-	WT iBP9+	WT iBP10-	WT iBP10+	DKO-	DKO+			GID8	WT iBP9-	WT iBP9+	WT iBP10-	WT iBP10+				GID8	WT iBP9-	WT iBP9+	WT iBP10-	WT iBP10+
2022-08-23	GID8	1	1.01	0.65	1	0.86	1.37	0.001	0.001			2022-08-23	0.677083	1.02041	1.10256	1.85135				2022-08-23	1	1.50706	1	1.67913
	Vinculin	1	0.99	0.96	0.98	0.78	0.74	1.14	1.17			2022-09-13	0.416667	0.68	0.723881	1.30667				2022-09-13	1	1.632	1	1.80509
	GID8	1	1.0202	0.677083	1.02041	1.10256	1.85135	0.001	0.001			2022-09-20	0.810345	1.45536	1.48315	1.6729				2022-09-20	1	1.79597	1	1.12794
	GID8	1	1.0202	1	1.50706	1	1.67913	1	1			Average	0.634698	1.05192	1.1032	1.61031				Average	1	1.64501	1	1.53739
												SD	0.200232	0.388638	0.379633	0.277685				SD	0	0.144893	0	0.360141
		WT-	WT+	WT iBP9-	WT iBP9+	WT iBP10-	WT iBP10+	DKO-	DKO+			T.TEST	0.0985777		0.0708825					T.TEST	0.00820381		0.0613732
2022-09-13	GID8	1	1	0.5	0.85	0.97	1.96	0.001	0.001
	Vinculin	1	1.08	1.2	1.25	1.34	1.5	1.44	1.05
	GID8	1	0.925926	0.416667	0.68	0.723881	1.30667	0.001	0.001
	GID8	1	0.925926	1	1.632	1	1.80509	1	1
		WT-	WT+	WT iBP9-	WT iBP9+	WT iBP10-	WT iBP10+	DKO-	DKO+
2022-09-20	GID8	1	1.11	0.94	1.63	1.32	1.79	0.001	0.001
	Vinculin	1	0.96	1.16	1.12	0.89	1.07	1.45	1.29
	GID8	1	1.15625	0.810345	1.45536	1.48315	1.6729	0.001	0.001
	GID8	1	1.15625	1	1.79597	1	1.12794	1	1
		WT-	WT+	WT iBP9-	WT iBP9+	WT iBP10-	WT iBP10+	DKO-	DKO+			MAEA	WT iBP9-	WT iBP9+	WT iBP10-	WT iBP10+				MAEA	WT iBP9-	WT iBP9+	WT iBP10-	WT iBP10+
2022-08-12	MAEA	1	1.13	1.19	1.65	1.3	1.6	0.26	0.36			2022-08-12	0.68	0.859375	1.19266	1.63265				2022-08-12	1	1.26379	1	1.36892
	Vinculin	1	1.2	1.75	1.92	1.09	0.98	2.73	2.63			2022-09-15	0.883929	1.31132	1.23232	1.3271				2022-09-15	1	1.48351	1	1.07691
	MAEA	1	0.941667	0.68	0.859375	1.19266	1.63265	0.0952381	0.136882			2022-09-20	0.70339	1.05505	0.981308	1.29167				2022-09-20	1	1.49994	1	1.31627
	MAEA	1	0.941667	1	1.26379	1	1.36892	1	1.43726			Average	0.755773	1.07525	1.13543	1.41714				Average	1	1.41575	1	1.25403
												SD	0.111601	0.226649	0.134939	0.187478				SD	0	0.131859	0	0.155634
		WT-	WT+	WT iBP9-	WT iBP9+	WT iBP10-	WT iBP10+	DKO-	DKO+			T.TEST	0.0594007		0.0545872					T.TEST	0.0159664		0.0528274
2022-09-15	MAEA	1	0.74	0.99	1.39	1.22	1.42	0.001	0.001
	Vinculin	1	1.07	1.12	1.06	0.99	1.07	1.25	1.15
	MAEA	1	0.691589	0.883929	1.31132	1.23232	1.3271	0.001	0.001
	MAEA	1	0.691589	1	1.48351	1	1.07691	1	1
		WT-	WT+	WT iBP9-	WT iBP9+	WT iBP10-	WT iBP10+	DKO-	DKO+
2022-09-20	MAEA	1	0.93	0.83	1.15	1.05	1.55	0.28	0.31
	Vinculin	1	1.05	1.18	1.09	1.07	1.2	1.19	1.12
	MAEA	1	0.885714	0.70339	1.05505	0.981308	1.29167	0.001	0.001
	MAEA	1	0.885714	1	1.49994	1	1.31627	1	1
		WT-	WT+	WT iBP9-	WT iBP9+	WT iBP10-	WT iBP10+	DKO-	DKO+			MKLN1	WT iBP9-	WT iBP9+	WT iBP10-	WT iBP10+				MKLN1	WT iBP9-	WT iBP9+	WT iBP10-	WT iBP10+
2022-08-25	MKLN1	1	1.11	0.85	1.05	1.82	2	2.36	2.01			2022-08-25	0.885417	1.16667	2.21951	2.40964				2022-08-25	1	1.31765	1	1.08566
	Vinculin	1	0.97	0.96	0.9	0.82	0.83	1.16	1.14			2022-10-16	0.677165	0.669355	0.962687	1.0604				2022-10-16	1	0.988466	1	1.1015
	MKLN1	1	1.14433	0.885417	1.16667	2.21951	2.40964	2.03448	1.76316			2022-10-19	0.910714	0.972727	1.57303	1.41441				2022-10-19	1	1.06809	1	0.899163
	MKLN1	1	1.14433	1	1.31765	1	1.08566	1	0.866637			Average	0.824432	0.93625	1.58508	1.62815				Average	1	1.12474	1	1.02878
												SD	0.128162	0.250655	0.628499	0.699551				SD	0	0.171745	0	0.112527
		WT-	WT+	WT iBP9-	WT iBP9+	WT iBP10-	WT iBP10+	DKO-	DKO+			T.TEST	0.270611		0.470309					T.TEST	0.167689		0.350558
2022-10-16	MKLN1	1	1.14	0.86	0.83	1.29	1.58	2.6	2.58
	Vinculin	1	1.18	1.27	1.24	1.34	1.49	1.72	1.58
	MKLN1	1	0.966102	0.677165	0.669355	0.962687	1.0604	1.51163	1.63291
	MKLN1	1	0.966102	1	0.988466	1	1.1015	1	1.08023
2022-10-19		WT-	WT+	WT iBP9-	WT iBP9+	WT iBP10-	WT iBP10+	DKO-	DKO+
	MKLN1	1	1.11	1.02	1.07	1.4	1.57	2.23	2.2
	Vinculin	1	0.9	1.12	1.1	0.89	1.11	1.43	1.27
	MKLN1	1	1.23333	0.910714	0.972727	1.57303	1.41441	1.55944	1.73228
	MKLN1	1	1.23333	1	1.06809	1	0.899163	1	1.11084
		WT-	WT+	WT iBP9-	WT iBP9+	WT iBP10-	WT iBP10+	DKO-	DKO+			WDR26	WT iBP9-	WT iBP9+	WT iBP10-	WT iBP10+				WDR26	WT iBP9-	WT iBP9+	WT iBP10-	WT iBP10+
2022-09-07	WDR26	1	1.18	0.96	1.03	1.37	1.42	1.04	1.09			2022-09-07	0.827586	1.0198	1.05385	1.19328				2022-09-07	1	1.23226	1	1.13231
	Vinculin	1	1.36	1.16	1.01	1.3	1.19	1.17	1.19			2022-10-16	0.886957	1.04959	1.06723	1.36885				2022-10-16	1	1.18336	1	1.28263
	WDR26	1	0.867647	0.827586	1.0198	1.05385	1.19328	0.888889	0.915966			2022-10-18	0.961165	1.19192	1.49438	1.72549				2022-10-18	1	1.24008	1	1.15465
	WDR26	1	0.867647	1	1.23226	1	1.13231	1	1.03046			Average	0.891903	1.0871	1.20515	1.42921				Average	1	1.21857	1	1.18986
												SD	0.0669266	0.0919873	0.25057	0.271191				SD	0	0.0307402	0	0.0811093
		WT-	WT+	WT iBP9-	WT iBP9+	WT iBP10-	WT iBP10+	DKO-	DKO+			T.TEST	0.0230066		0.176443					T.TEST	0.0032646		0.0278959
2022-10-16	WDR26	1	1.06	1.02	1.27	1.27	1.67	1.54	1.86
	Vinculin	1	0.98	1.15	1.21	1.19	1.22	1.44	1.43
	WDR26	1	1.08163	0.886957	1.04959	1.06723	1.36885	1.06944	1.3007
	WDR26	1	1.08163	1	1.18336	1	1.28263	1	1.21624
		WT-	WT+	WT iBP9-	WT iBP9+	WT iBP10-	WT iBP10+	DKO-	DKO+
2022-10-18	WDR26	1	1	0.99	1.18	1.33	1.76	1.39	1.4
	Vinculin	1	0.97	1.03	0.99	0.89	1.02	1.23	1.2
	WDR26	1	1.03093	0.961165	1.19192	1.49438	1.72549	1.13008	1.16667
	WDR26	1	1.03093	1	1.24008	1	1.15465	1	1.03237
		WT-	WT+	WT iBP9-	WT iBP9+	WT iBP10-	WT iBP10+	DKO-	DKO+			ARMC8	WT iBP9-	WT iBP9+	WT iBP10-	WT iBP10+				ARMC8	WT iBP9-	WT iBP9+	WT iBP10-	WT iBP10+
2022-09-13	ARMC8	1	1.08	0.98	0.97	1.12	1.32	0.73	0.67			2022-09-13	0.844828	0.76378	0.973913	1.03125				2022-09-13	1	0.904066	1	1.05887
	Vinculin	1	1.05	1.16	1.27	1.15	1.28	1.44	1.32			2022-10-18	0.689655	0.641667	0.706422	0.793388				2022-10-18	1	0.930417	1	1.12311
	ARMC8	1	1.02857	0.844828	0.76378	0.973913	1.03125	0.506944	0.507576			2022-10-19	0.814815	0.828829	0.989011	1.03				2022-10-19	1	1.0172	1	1.04144
	ARMC8	1	1.02857	1	0.904066	1	1.05887	1	1.00125			Average	0.783099	0.744758	0.889782	0.951546				Average	1	0.95056	1	1.07448
												SD	0.0823045	0.0950199	0.158974	0.13697				SD	0	0.0591956	0	0.0430096
		WT-	WT+	WT iBP9-	WT iBP9+	WT iBP10-	WT iBP10+	DKO-	DKO+			T.TEST	0.3129		0.318791					T.TEST	0.142468		0.0477546
2022-10-18	ARMC8	1	0.95	0.8	0.77	0.77	0.96	0.55	0.71
	Vinculin	1	0.95	1.16	1.2	1.09	1.21	1.5	1.46
	ARMC8	1	1	0.689655	0.641667	0.706422	0.793388	0.366667	0.486301
	ARMC8	1	1	1	0.930417	1	1.12311	1	1.32628
		WT-	WT+	WT iBP9-	WT iBP9+	WT iBP10-	WT iBP10+	DKO-	DKO+
2022-10-19	ARMC8	1	1.07	0.88	0.92	0.9	1.03	0.61	0.59
	Vinculin	1	0.99	1.08	1.11	0.91	1	1.36	1.3
	ARMC8	1	1.08081	0.814815	0.828829	0.989011	1.03	0.448529	0.453846
	ARMC8	1	1.08081	1	1.0172	1	1.04144	1	1.01185
