# Supplementary material for: RANBP9 and RANBP10 cooperate in regulating non-small cell lung cancer proliferation
Source: J Exp Clin Cancer Res. 2025 Aug 29;44:259. doi: 10.1186/s13046-025-03491-8 (PMC12395873; doi:10.1186/s13046-025-03491-8)
Supplement: Supplementary file 18 — Supplementary Material 18. [file 13046_2025_3491_MOESM18_ESM.xlsx]

## Sheet: ΔΔCt
			GAPDH	RanBP9						SD					FC Avg	SDbar min	SDbar max
			Ct	Ct	DCt	Avg DCt	DDCt	Avg DDCt	2-DDCt (FC)	SD DDCt	Lower limit	Upper limit		WT-	1	0.0791219	0.08592
	WT-	n1	19.919	27.4816	7.56265	7.43452	0.128139	-2.96059e-16	1	0.118918	0.920878	1.08592		WT+	1.76955	0.300917	0.362573
		n2	20.1976	27.5253	7.32771		-0.10681							WT iBP9-	1.43225	0.147397	0.164306
		n3	20.1444	27.5575	7.41319		-0.0213286							WT iBP9+	31.6669	2.93794	3.23838
	WT+	n1	20.3456	27.201	6.85533	6.61113	-0.579186	-0.823383	1.76955	0.268908	1.46863	2.13212		WT iBP10-	1.20041	0.034974	0.0360236
		n2	20.5529	27.208	6.65513		-0.779387							WT iBP10+	1.34873	0.459375	0.696653
		n3	20.2804	26.6034	6.32294		-1.11158
	WT iBP9-	n1	20.3429	27.0997	6.75676	6.91623	-0.677754	-0.518281	1.43225	0.15668	1.28485	1.59655			P value from t-test (DCt)
		n2	20.1933	27.1153	6.92198		-0.512538							WT-
		n3	20.1821	27.2521	7.06996		-0.364552							WT+	0.0203354
	WT iBP9+	n1	20.4007	22.8828	2.4821	2.44961	-4.95242	-4.9849	31.6669	0.14047	28.729	34.9053		WT iBP9-
		n2	20.3449	22.6407	2.29575		-5.13877							WT iBP9+	3.67807e-06
		n3	20.1808	22.7518	2.57099		-4.86352							WT iBP10-
	WT iBP10-	n1	20.1914	27.3157	7.1243	7.17099	-0.310212	-0.263522	1.20041	0.0426577	1.16543	1.23643		WT iBP10+	0.676158
		n2	20.1462	27.327	7.18075		-0.253768
		n3	20.0361	27.244	7.20793		-0.226586
	WT iBP10+	n1	20.1248	27.6556	7.53074	7.00291	0.0962213	-0.431602	1.34873	0.60077	0.889356	2.04538
		n2	20.1256	27.2544	7.12884		-0.305672
		n3	20.9674	27.3166	6.34916		-1.08535
			GAPDH	RanBP10						SD					FC Avg	SDbar min	SDbar max
			Ct	Ct	DCt	Avg DCt	DDCt	Avg DDCt	2-DDCt (FC)	SD DDCt	Lower limit	Upper limit		WT-	1	0.115589	0.130697
	WT-	n1	19.919	29.9898	10.0708	9.86723	0.203579	0	1	0.177212	0.884411	1.1307		WT+	1.27784	0.0873291	0.093735
		n2	20.1976	29.9809	9.78335		-0.0838795							WT iBP9-	1.40284	0.0854008	0.0909368
		n3	20.1444	29.8919	9.74753		-0.119699							WT iBP9+	1.54708	0.17017	0.1912
	WT+	n1	20.3456	29.9738	9.62814	9.51352	-0.239088	-0.35371	1.27784	0.102126	1.19051	1.37158		WT iBP10-	1.30541	0.12444	0.137553
		n2	20.5529	29.9851	9.4322		-0.435024							WT iBP10+	61.5046	17.3281	24.1251
		n3	20.2804	29.7606	9.48021		-0.387016
	WT iBP9-	n1	20.3429	29.6183	9.27539	9.37888	-0.591837	-0.488347	1.40284	0.0906143	1.31744	1.49377			P value from t-test (DCt)
		n2	20.1933	29.6106	9.41727		-0.449959							WT-
		n3	20.1821	29.6261	9.44398		-0.423246							WT+	0.0534027
	WT iBP9+	n1	20.4007	29.8099	9.40922	9.23768	-0.458012	-0.62955	1.54708	0.168113	1.37691	1.73828		WT iBP9-
		n2	20.3449	29.5755	9.2306		-0.636623							WT iBP9+	0.288466
		n3	20.1808	29.254	9.07321		-0.794014							WT iBP10-
	WT iBP10-	n1	20.1914	29.72	9.52865	9.48272	-0.338575	-0.384508	1.30541	0.14453	1.18097	1.44297		WT iBP10+	0.00117734
		n2	20.1462	29.467	9.3208		-0.546423
		n3	20.0361	29.6348	9.5987		-0.268526
	WT iBP10+	n1	20.1248	24.3055	4.18067	3.92461	-5.68656	-5.94262	61.5046	0.477416	44.1765	85.6297
		n2	20.1256	24.3449	4.21936		-5.64787
		n3	20.9674	24.3412	3.37379		-6.49344
			GAPDH	GID8						SD					FC Avg	SDbar min	SDbar max
			Ct	Ct	DCt	Avg DCt	DDCt	Avg DDCt	2-DDCt (FC)	SD DDCt	Lower limit	Upper limit		WT-	1	0.132025	0.152107
	WT-	n1	19.919	27.6803	7.7613	7.53128	0.23002	-2.96059e-16	1	0.204275	0.867975	1.15211		WT+	1.26277	0.136005	0.152421
		n2	20.1976	27.6591	7.46151		-0.0697734							WT iBP9-	1.11133	0.0778305	0.0836918
		n3	20.1444	27.5154	7.37103		-0.160247							WT iBP9+	1.12568	0.0806643	0.0868908
	WT+	n1	20.3456	27.4979	7.15225	7.19468	-0.379033	-0.336596	1.26277	0.164404	1.12677	1.41519		WT iBP10-	0.942841	0.114159	0.129886
		n2	20.5529	27.6085	7.05566		-0.475621							WT iBP10+	1.23408	0.390281	0.570796
		n3	20.2804	27.6566	7.37615		-0.155133
	WT iBP9-	n1	20.3429	27.6072	7.2643	7.379	-0.266978	-0.152284	1.11133	0.10475	1.0335	1.19502			P value from t-test (DCt)
		n2	20.1933	27.6629	7.46961		-0.0616728							WT-
		n3	20.1821	27.5852	7.40308		-0.128201							WT+	0.0933569
	WT iBP9+	n1	20.4007	27.7042	7.30358	7.36049	-0.227696	-0.170794	1.12568	0.107272	1.04501	1.21257		WT iBP9-
		n2	20.3449	27.6386	7.29365		-0.237626							WT iBP9+	0.841146
		n3	20.1808	27.665	7.48422		-0.0470587							WT iBP10-
	WT iBP10-	n1	20.1914	27.62	7.42865	7.61619	-0.102627	0.0849139	0.942841	0.186196	0.828682	1.07273		WT iBP10+	0.34592
		n2	20.1462	27.7651	7.61891		0.0876344
		n3	20.0361	27.8371	7.80101		0.269735
	WT iBP10+	n1	20.1248	27.6816	7.55679	7.22784	0.0255102	-0.303438	1.23408	0.548463	0.843801	1.80488
		n2	20.1256	27.6576	7.53204		0.000764211
		n3	20.9674	27.5621	6.59469		-0.936587
			GAPDH	MAEA						SD					FC Avg	SDbar min	SDbar max
			Ct	Ct	DCt	Avg DCt	DDCt	Avg DDCt	2-DDCt (FC)	SD DDCt	Lower limit	Upper limit		WT-	1	0.145235	0.169913
	WT-	n1	19.8858	28.073	8.18719	7.93347	0.25372	2.96059e-16	1	0.226401	0.854765	1.16991		WT+	1.45239	0.275796	0.340443
		n2	20.1444	27.8965	7.75204		-0.181423							WT iBP9-	1.29845	0.127627	0.141539
		n3	20.114	27.9752	7.86117		-0.0722974							WT iBP9+	1.2614	0.218322	0.264018
	WT+	n1	20.3931	28.1079	7.71473	7.39504	-0.218736	-0.53843	1.45239	0.303812	1.1766	1.79283		WT iBP10-	1.06078	0.0221761	0.0226496
		n2	20.6238	27.9841	7.36028		-0.573182							WT iBP10+	1.13686	0.455386	0.759693
		n3	20.348	27.4581	7.1101		-0.823371
	WT iBP9-	n1	20.4194	27.8454	7.42597	7.55668	-0.507501	-0.376787	1.29845	0.149268	1.17082	1.43999			P value from t-test (DCt)
		n2	20.2284	27.9477	7.71933		-0.214135							WT-
		n3	20.2555	27.7803	7.52474		-0.408723							WT+	0.0747503
	WT iBP9+	n1	20.4217	28.0267	7.60499	7.59844	-0.328481	-0.335032	1.2614	0.274178	1.04308	1.52542		WT iBP9-
		n2	20.3398	27.6609	7.32104		-0.612426							WT iBP9+	0.831294
		n3	20.0532	27.9225	7.86928		-0.0641874							WT iBP10-
	WT iBP10-	n1	20.2625	28.1359	7.87343	7.84834	-0.0600389	-0.0851313	1.06078	0.0304798	1.03861	1.08343		WT iBP10+	0.836549
		n2	20.1699	28.027	7.85716		-0.0763048
		n3	20.1313	27.9457	7.81442		-0.11905
	WT iBP10+	n1	20.1721	28.5848	8.41261	7.74841	0.479148	-0.185054	1.13686	0.738325	0.681473	1.89655
		n2	20.1338	28.013	7.87919		-0.0542806
		n3	21.0373	27.9907	6.95344		-0.980028
			GAPDH	MKLN1						SD					FC Avg	SDbar min	SDbar max
			Ct	Ct	DCt	Avg DCt	DDCt	Avg DDCt	2-DDCt (FC)	SD DDCt	Lower limit	Upper limit		WT-	1	0.0787532	0.0854854
	WT-	n1	19.8858	27.7317	7.84586	7.7131	0.132759	0	1	0.11834	0.921247	1.08549		WT+	1.88126	0.189918	0.211244
		n2	20.1444	27.7631	7.61869		-0.0944099							WT iBP9-	1.41288	0.18814	0.217041
		n3	20.114	27.7888	7.67475		-0.0383492							WT iBP9+	1.4099	0.0575608	0.0600108
	WT+	n1	20.3931	27.3414	6.9483	6.8014	-0.764803	-0.911702	1.88126	0.153531	1.69135	2.09251		WT iBP10-	1.34224	0.105357	0.114331
		n2	20.6238	27.2658	6.642		-1.0711							WT iBP10+	1.61928	0.498457	0.720132
		n3	20.348	27.1619	6.8139		-0.899202
	WT iBP9-	n1	20.4194	27.4	6.9806	7.21446	-0.7325	-0.498636	1.41288	0.206164	1.22474	1.62992			P value from t-test (DCt)
		n2	20.2284	27.5983	7.36992		-0.34318							WT-
		n3	20.2555	27.5484	7.29287		-0.420227							WT+	0.00160838
	WT iBP9+	n1	20.4217	27.6077	7.18604	7.21751	-0.527061	-0.495593	1.4099	0.0601358	1.35234	1.46991		WT iBP9-
		n2	20.3398	27.5194	7.17964		-0.533464							WT iBP9+	0.982358
		n3	20.0532	27.34	7.28685		-0.426252							WT iBP10-
	WT iBP10-	n1	20.2625	27.5072	7.24466	7.28845	-0.468441	-0.424648	1.34224	0.117933	1.23689	1.45658		WT iBP10+	0.472276
		n2	20.1699	27.3685	7.19868		-0.51442
		n3	20.1313	27.5533	7.42202		-0.291082
	WT iBP10+	n1	20.1721	27.5036	7.33149	7.01775	-0.381615	-0.695354	1.61928	0.530793	1.12082	2.33941
		n2	20.1338	27.4507	7.31686		-0.396244
		n3	21.0373	27.4422	6.4049		-1.3082
			GAPDH	RMND5A						SD					FC Avg	SDbar min	SDbar max
			Ct	Ct	DCt	Avg DCt	DDCt	Avg DDCt	2-DDCt (FC)	SD DDCt	Lower limit	Upper limit		WT-	1	0.248441	0.330567
	WT-	n1	19.8858	29.6384	9.75262	9.31192	0.440702	0	1	0.412041	0.751559	1.33057		WT+	1.5109	0.403835	0.551146
		n2	20.1444	29.3913	9.24686		-0.0650654							WT iBP9-	1.26073	0.0707059	0.0749069
		n3	20.114	29.0503	8.93629		-0.375637							WT iBP9+	1.18046	0.111122	0.12267
	WT+	n1	20.3931	29.5626	9.16943	8.71651	-0.142492	-0.595408	1.5109	0.448669	1.10706	2.06205		WT iBP10-	1.08173	0.00937793	0.00945995
		n2	20.6238	29.3317	8.7079		-0.604027							WT iBP10+	1.20617	0.36444	0.522229
		n3	20.348	28.6202	8.27222		-1.03971
	WT iBP9-	n1	20.4194	29.4845	9.06511	8.97766	-0.246809	-0.33426	1.26073	0.0832685	1.19002	1.33564			P value from t-test (DCt)
		n2	20.2284	29.1969	8.96855		-0.343376							WT-
		n3	20.2555	29.1548	8.89933		-0.412596							WT+	0.166237
	WT iBP9+	n1	20.4217	29.5512	9.12954	9.07258	-0.182381	-0.239346	1.18046	0.142632	1.06934	1.30313		WT iBP9-
		n2	20.3398	29.2501	8.91026		-0.401657							WT iBP9+	0.388321
		n3	20.0532	29.2311	9.17792		-0.134001							WT iBP10-
	WT iBP10-	n1	20.2625	29.4698	9.20731	9.19858	-0.104614	-0.113342	1.08173	0.0125618	1.07235	1.09119		WT iBP10+	0.652437
		n2	20.1699	29.3541	9.18418		-0.127739
		n3	20.1313	29.3356	9.20425		-0.107672
	WT iBP10+	n1	20.1721	29.4509	9.27875	9.04148	-0.0331745	-0.270437	1.20617	0.519002	0.841733	1.7284
		n2	20.1338	29.5333	9.39945		0.0875263
		n3	21.0373	29.4836	8.44626		-0.865664
			GAPDH	RMND5B						SD					FC Avg	SDbar min	SDbar max
			Ct	Ct	DCt	Avg DCt	DDCt	Avg DDCt	2-DDCt (FC)	SD DDCt	Lower limit	Upper limit		WT-	1	0.13851	0.16078
	WT-	n1	20.1873	27.3378	7.15049	7.19285	-0.0423597	2.96059e-16	1	0.215094	0.86149	1.16078		WT+	1.36464	0.0959049	0.103154
		n2	20.274	27.2761	7.00209		-0.190763							WT iBP9-	0.90596	0.142376	0.168924
		n3	19.8699	27.2959	7.42597		0.233123							WT iBP9+	1.07859	0.114265	0.127805
	WT+	n1	20.3929	27.2586	6.86572	6.74433	-0.327136	-0.448521	1.36464	0.105129	1.26874	1.46779		WT iBP10-	0.89047	0.0212388	0.0217577
		n2	20.6326	27.315	6.68238		-0.510475							WT iBP10+	1.02398	0.425424	0.727793
		n3	20.135	26.8199	6.6849		-0.507951
	WT iBP9-	n1	20.3256	27.389	7.06337	7.33533	-0.12948	0.142481	0.90596	0.246662	0.763583	1.07488			P value from t-test (DCt)
		n2	20.1242	27.5222	7.39804		0.205184							WT-
		n3	20.1038	27.6484	7.54459		0.351741							WT+	0.0499241
	WT iBP9+	n1	20.4348	27.5202	7.08538	7.08371	-0.107471	-0.109141	1.07859	0.161556	0.964321	1.20639		WT iBP9-
		n2	20.3346	27.2559	6.92133		-0.271526							WT iBP9+	0.22436
		n3	20.1813	27.4257	7.24442		0.0515734							WT iBP10-
	WT iBP10-	n1	20.0655	27.4511	7.38559	7.36021	0.192742	0.16736	0.89047	0.034827	0.869232	0.912228		WT iBP10+	0.696499
		n2	20.0381	27.4126	7.37453		0.181683
		n3	19.9961	27.3166	7.32051		0.127656
	WT iBP10+	n1	20.0461	27.8867	7.84059	7.15866	0.647738	-0.0341899	1.02398	0.774627	0.598558	1.75177
		n2	20.0284	27.3473	7.31897		0.126122
		n3	20.9472	27.2636	6.31642		-0.87643
			GAPDH	ARMC8						SD					FC Avg	SDbar min	SDbar max
			Ct	Ct	DCt	Avg DCt	DDCt	Avg DDCt	2-DDCt (FC)	SD DDCt	Lower limit	Upper limit		WT-	1	0.182198	0.222791
	WT-	n1	19.919	29.9999	10.0809	9.75129	0.329627	5.92119e-16	1	0.290177	0.817802	1.22279		WT+	1.68573	0.216228	0.248045
		n2	20.1976	29.8361	9.63855		-0.112734							WT iBP9-	1.30796	0.0514744	0.0535832
		n3	20.1444	29.6788	9.5344		-0.216893							WT iBP9+	1.31013	0.158986	0.180943
	WT+	n1	20.3456	29.5313	9.18569	8.99791	-0.5656	-0.753374	1.68573	0.198046	1.4695	1.93378		WT iBP10-	1.17034	0.193381	0.231659
		n2	20.5529	29.3439	8.79099		-0.960301							WT iBP10+	1.4877	0.521136	0.802113
		n3	20.2804	29.2975	9.01707		-0.734221
	WT iBP9-	n1	20.3429	29.6604	9.31746	9.36397	-0.433833	-0.387316	1.30796	0.0579244	1.25648	1.36154			P value from t-test (DCt)
		n2	20.1933	29.6221	9.42885		-0.322436							WT-
		n3	20.1821	29.5277	9.34561		-0.40568							WT+	0.0256322
	WT iBP9+	n1	20.4007	29.7883	9.38763	9.36158	-0.363654	-0.389713	1.31013	0.186641	1.15115	1.49108		WT iBP9-
		n2	20.3449	29.5082	9.16327		-0.588013							WT iBP9+	0.984704
		n3	20.1808	29.7146	9.53382		-0.217471							WT iBP10-
	WT iBP10-	n1	20.1914	30.0083	9.8169	9.52436	0.0656083	-0.226929	1.17034	0.260557	0.97696	1.402		WT iBP10+	0.446548
		n2	20.1462	29.5852	9.43897		-0.312316
		n3	20.0361	29.3533	9.31721		-0.434079
	WT iBP10+	n1	20.1248	29.7071	9.58225	9.1782	-0.169036	-0.573085	1.4877	0.622146	0.966565	2.28981
		n2	20.1256	29.6162	9.49059		-0.260693
		n3	20.9674	29.4292	8.46176		-1.28952
			GAPDH	GID4						SD					FC Avg	SDbar min	SDbar max
			Ct	Ct	DCt	Avg DCt	DDCt	Avg DDCt	2-DDCt (FC)	SD DDCt	Lower limit	Upper limit		WT-	1	0.0903114	0.0992772
	WT-	n1	19.8858	29.3858	9.50002	9.34268	0.157346	5.92119e-16	1	0.136555	0.909689	1.09928		WT+	1.39444	0.153057	0.171928
		n2	20.1444	29.4173	9.27289		-0.0697848							WT iBP9-	1.57267	0.0585395	0.0608028
		n3	20.114	29.3692	9.25512		-0.0875613							WT iBP9+	1.49492	0.164175	0.18443
	WT+	n1	20.3931	29.3393	8.94619	8.86299	-0.396487	-0.479687	1.39444	0.167737	1.24138	1.56637		WT iBP10-	1.30975	0.212098	0.253081
		n2	20.6238	29.2937	8.66992		-0.672761							WT iBP10+	1.42066	0.412044	0.580374
		n3	20.348	29.3208	8.97286		-0.369815
	WT iBP9-	n1	20.4194	29.0561	8.63671	8.68946	-0.705964	-0.653216	1.57267	0.0547265	1.51413	1.63347			P value from t-test (DCt)
		n2	20.2284	28.9744	8.74597		-0.596705							WT-
		n3	20.2555	28.9412	8.6857		-0.656979							WT+	0.0198729
	WT iBP9+	n1	20.4217	29.0864	8.66474	8.76261	-0.677943	-0.580072	1.49492	0.167834	1.33075	1.67935		WT iBP9-
		n2	20.3398	29.0065	8.66668		-0.675996							WT iBP9+	0.535925
		n3	20.0532	29.0096	8.9564		-0.386277							WT iBP10-
	WT iBP10-	n1	20.2625	29.005	8.74245	8.95339	-0.600228	-0.38929	1.30975	0.254871	1.09765	1.56283		WT iBP10+	0.739183
		n2	20.1699	29.4065	9.23659		-0.106091
		n3	20.1313	29.0124	8.88113		-0.461552
	WT iBP10+	n1	20.1721	29.3207	9.1486	8.83612	-0.194081	-0.506557	1.42066	0.494185	1.00861	2.00103
		n2	20.1338	29.2272	9.09339		-0.249287
		n3	21.0373	29.3037	8.26638		-1.0763
			GAPDH	WDR26						SD					FC Avg	SDbar min	SDbar max
			Ct	Ct	DCt	Avg DCt	DDCt	Avg DDCt	2-DDCt (FC)	SD DDCt	Lower limit	Upper limit		WT-	1	0.159475	0.189732
	WT-	n1	20.1873	27.8933	7.70601	7.77082	-0.0648111	2.96059e-16	1	0.250637	0.840525	1.18973		WT+	1.63321	0.24325	0.28582
		n2	20.274	27.833	7.55896		-0.211866							WT iBP9-	1.19705	0.128997	0.144577
		n3	19.8699	27.9174	8.0475		0.276677							WT iBP9+	1.35648	0.0291558	0.0297962
	WT+	n1	20.3929	27.5355	7.14267	7.06311	-0.628154	-0.707712	1.63321	0.232666	1.38996	1.91903		WT iBP10-	1.05907	0.0476047	0.0498452
		n2	20.6326	27.4337	6.8011		-0.969722							WT iBP10+	1.33504	0.404512	0.580358
		n3	20.135	27.3806	7.24556		-0.52526
	WT iBP9-	n1	20.3256	27.6498	7.32422	7.51133	-0.446601	-0.259489	1.19705	0.1645	1.06806	1.34163			P value from t-test (DCt)
		n2	20.1242	27.7574	7.63321		-0.137615							WT-
		n3	20.1038	27.6804	7.57657		-0.194251							WT+	0.0232923
	WT iBP9+	n1	20.4348	27.7856	7.35084	7.33095	-0.41998	-0.439868	1.35648	0.031347	1.32732	1.38628		WT iBP9-
		n2	20.3346	27.6294	7.29482		-0.476003							WT iBP9+	0.19443
		n3	20.1813	27.5285	7.3472		-0.42362							WT iBP10-
	WT iBP10-	n1	20.0655	27.7299	7.66441	7.68802	-0.10641	-0.0827999	1.05907	0.066351	1.01147	1.10892		WT iBP10+	0.382166
		n2	20.0381	27.6748	7.63671		-0.134116
		n3	19.9961	27.759	7.76295		-0.0078729
	WT iBP10+	n1	20.0461	27.7134	7.66725	7.35394	-0.103576	-0.416885	1.33504	0.520761	0.93053	1.9154
		n2	20.0284	27.6701	7.64177		-0.129051
		n3	20.9472	27.7	6.75279		-1.01803
			GAPDH	YPEL5						SD					FC Avg	SDbar min	SDbar max
			Ct	Ct	DCt	Avg DCt	DDCt	Avg DDCt	2-DDCt (FC)	SD DDCt	Lower limit	Upper limit		WT-	1	0.202662	0.254173
	WT-	n1	20.1873	34.7248	14.5375	14.7875	-0.250024	-5.92119e-16	1	0.326736	0.797338	1.25417		WT+	1.30817	0.345174	0.468897
		n2	20.274	34.9419	14.6679		-0.119676							WT iBP9-	0.762241	0.0952617	0.108868
		n3	19.8699	35.0271	15.1572		0.3697							WT iBP9+	0.769788	0.075449	0.0836475
	WT+	n1	20.3929	35.0873	14.6944	14.4	-0.0931142	-0.387548	1.30817	0.441948	0.962995	1.77707		WT iBP10-	0.681916	0.123563	0.150907
		n2	20.6326	34.5244	13.8918		-0.895736							WT iBP10+	1.08115	0.348248	0.513724
		n3	20.135	34.7487	14.6137		-0.173795
	WT iBP9-	n1	20.3256	35.3431	15.0175	15.1792	0.230012	0.391681	0.762241	0.192605	0.666979	0.871108			P value from t-test (DCt)
		n2	20.1242	35.2519	15.1278		0.340251							WT-
		n3	20.1038	35.4961	15.3923		0.604781							WT+	0.294328
	WT iBP9+	n1	20.4348	35.6306	15.1958	15.165	0.408278	0.377466	0.769788	0.148821	0.694339	0.853436		WT iBP9-
		n2	20.3346	35.6306	15.296		0.508469							WT iBP9+	0.92459
		n3	20.1813	35.1845	15.0032		0.215651							WT iBP10-
	WT iBP10-	n1	20.0655	35.0881	15.0225	15.3399	0.235003	0.552335	0.681916	0.288417	0.558353	0.832823		WT iBP10+	0.165678
		n2	20.0381	35.4491	15.411		0.623482
		n3	19.9961	35.5821	15.5861		0.79852
	WT iBP10+	n1	20.0461	34.8589	14.8127	14.675	0.0252158	-0.112564	1.08115	0.560877	0.7329	1.59487
		n2	20.0284	35.1825	15.1541		0.366584
		n3	20.9472	35.0053	14.058		-0.729492

## Sheet: 10-11-22_1
Block Type	96well
Chemistry	TAQMAN
Experiment File Name	C:\Applied Biosystems\StepOne Software v2.3\experiments\Coppola\Yasuko\A549 inducibles 10112022.eds
Experiment Run End Time	2022-10-11 10:42:00 AM EDT
Instrument Type	steponeplus
Passive Reference	ROX
Well	Sample Name	Target Name	Task	Reporter	Quencher	Cт	Cт Mean	Cт SD	Quantity	Quantity Mean	Quantity SD	Automatic Ct Threshold	Ct Threshold	Automatic Baseline	Baseline Start	Baseline End	Comments	OUTLIERRG
A1																		N
A2																		N
A3																		N
A4	WT-	Armc8	UNKNOWN	FAM	NFQ-MGB	29.9999	29.8382	0.160566				FALSE	0.306722	TRUE	3	24		N
A5	WT-	Armc8	UNKNOWN	FAM	NFQ-MGB	29.8361	29.8382	0.160566				FALSE	0.306722	TRUE	3	24		N
A6	WT-	Armc8	UNKNOWN	FAM	NFQ-MGB	29.6788	29.8382	0.160566				FALSE	0.306722	TRUE	3	23		N
A7	WTiBP9-	Armc8	UNKNOWN	FAM	NFQ-MGB	29.6604	29.6034	0.06828				FALSE	0.306722	TRUE	3	24		N
A8	WTiBP9-	Armc8	UNKNOWN	FAM	NFQ-MGB	29.6221	29.6034	0.06828				FALSE	0.306722	TRUE	3	24		N
A9	WTiBP9-	Armc8	UNKNOWN	FAM	NFQ-MGB	29.5277	29.6034	0.06828				FALSE	0.306722	TRUE	3	24		N
A10	WTiBP10-	Armc8	UNKNOWN	FAM	NFQ-MGB	30.0083	29.6489	0.33212				FALSE	0.306722	TRUE	3	24		N
A11	WTiBP10-	Armc8	UNKNOWN	FAM	NFQ-MGB	29.5852	29.6489	0.33212				FALSE	0.306722	TRUE	3	24		N
A12	WTiBP10-	Armc8	UNKNOWN	FAM	NFQ-MGB	29.3533	29.6489	0.33212				FALSE	0.306722	TRUE	3	24		N
B1	WT-	Gapdh	UNKNOWN	FAM	NFQ-MGB	19.919	20.087	0.147908				FALSE	0.195285	TRUE	3	14		N
B2	WT-	Gapdh	UNKNOWN	FAM	NFQ-MGB	20.1976	20.087	0.147908				FALSE	0.195285	TRUE	3	15		N
B3	WT-	Gapdh	UNKNOWN	FAM	NFQ-MGB	20.1444	20.087	0.147908				FALSE	0.195285	TRUE	3	15		N
B4	WTiBP9-	Gapdh	UNKNOWN	FAM	NFQ-MGB	20.3429	20.2394	0.089782				FALSE	0.195285	TRUE	3	15		N
B5	WTiBP9-	Gapdh	UNKNOWN	FAM	NFQ-MGB	20.1933	20.2394	0.089782				FALSE	0.195285	TRUE	3	15		N
B6	WTiBP9-	Gapdh	UNKNOWN	FAM	NFQ-MGB	20.1821	20.2394	0.089782				FALSE	0.195285	TRUE	3	15		N
B7	WTiBP10-	Gapdh	UNKNOWN	FAM	NFQ-MGB	20.1914	20.1246	0.0798945				FALSE	0.195285	TRUE	3	15		N
B8	WTiBP10-	Gapdh	UNKNOWN	FAM	NFQ-MGB	20.1462	20.1246	0.0798945				FALSE	0.195285	TRUE	3	15		N
B9	WTiBP10-	Gapdh	UNKNOWN	FAM	NFQ-MGB	20.0361	20.1246	0.0798945				FALSE	0.195285	TRUE	3	16		N
B10	WT-	Gid8	UNKNOWN	FAM	NFQ-MGB	27.6803	27.6182	0.0896924				FALSE	0.18573	TRUE	3	22		N
B11	WT-	Gid8	UNKNOWN	FAM	NFQ-MGB	27.6591	27.6182	0.0896924				FALSE	0.18573	TRUE	3	23		N
B12	WT-	Gid8	UNKNOWN	FAM	NFQ-MGB	27.5154	27.6182	0.0896924				FALSE	0.18573	TRUE	3	22		N
C1	WT+	Gapdh	UNKNOWN	FAM	NFQ-MGB	20.3456	20.393	0.14227				FALSE	0.195285	TRUE	3	15		N
C2	WT+	Gapdh	UNKNOWN	FAM	NFQ-MGB	20.5529	20.393	0.14227				FALSE	0.195285	TRUE	3	15		N
C3	WT+	Gapdh	UNKNOWN	FAM	NFQ-MGB	20.2804	20.393	0.14227				FALSE	0.195285	TRUE	3	16		N
C4	WTiBP9+	Gapdh	UNKNOWN	FAM	NFQ-MGB	20.4007	20.3088	0.11429				FALSE	0.195285	TRUE	3	15		N
C5	WTiBP9+	Gapdh	UNKNOWN	FAM	NFQ-MGB	20.3449	20.3088	0.11429				FALSE	0.195285	TRUE	3	15		N
C6	WTiBP9+	Gapdh	UNKNOWN	FAM	NFQ-MGB	20.1808	20.3088	0.11429				FALSE	0.195285	TRUE	3	15		N
C7	WTiBP10+	Gapdh	UNKNOWN	FAM	NFQ-MGB	20.1248	20.4059	0.48625				FALSE	0.195285	TRUE	3	15		N
C8	WTiBP10+	Gapdh	UNKNOWN	FAM	NFQ-MGB	20.1256	20.4059	0.48625				FALSE	0.195285	TRUE	3	14		N
C9	WTiBP10+	Gapdh	UNKNOWN	FAM	NFQ-MGB	20.9674	20.4059	0.48625				FALSE	0.195285	TRUE	3	16		Y
C10	WT+	Gid8	UNKNOWN	FAM	NFQ-MGB	27.4979	27.5877	0.0813873				FALSE	0.18573	TRUE	3	22		N
C11	WT+	Gid8	UNKNOWN	FAM	NFQ-MGB	27.6085	27.5877	0.0813873				FALSE	0.18573	TRUE	3	23		N
C12	WT+	Gid8	UNKNOWN	FAM	NFQ-MGB	27.6566	27.5877	0.0813873				FALSE	0.18573	TRUE	3	23		N
D1	WT-	Ranbp9	UNKNOWN	FAM	NFQ-MGB	27.4816	27.5215	0.0381122				FALSE	0.18573	TRUE	3	23		N
D2	WT-	Ranbp9	UNKNOWN	FAM	NFQ-MGB	27.5253	27.5215	0.0381122				FALSE	0.18573	TRUE	3	22		N
D3	WT-	Ranbp9	UNKNOWN	FAM	NFQ-MGB	27.5575	27.5215	0.0381122				FALSE	0.18573	TRUE	3	23		N
D4	WTiBP9-	Ranbp9	UNKNOWN	FAM	NFQ-MGB	27.0997	27.1557	0.0838487				FALSE	0.18573	TRUE	3	22		N
D5	WTiBP9-	Ranbp9	UNKNOWN	FAM	NFQ-MGB	27.1153	27.1557	0.0838487				FALSE	0.18573	TRUE	3	22		N
D6	WTiBP9-	Ranbp9	UNKNOWN	FAM	NFQ-MGB	27.2521	27.1557	0.0838487				FALSE	0.18573	TRUE	3	23		N
D7	WTiBP10-	Ranbp9	UNKNOWN	FAM	NFQ-MGB	27.3157	27.2956	0.0450053				FALSE	0.18573	TRUE	3	22		N
D8	WTiBP10-	Ranbp9	UNKNOWN	FAM	NFQ-MGB	27.327	27.2956	0.0450053				FALSE	0.18573	TRUE	3	22		N
D9	WTiBP10-	Ranbp9	UNKNOWN	FAM	NFQ-MGB	27.244	27.2956	0.0450053				FALSE	0.18573	TRUE	3	22		N
D10	WTiBP9-	Gid8	UNKNOWN	FAM	NFQ-MGB	27.6072	27.6184	0.0400557				FALSE	0.18573	TRUE	3	23		N
D11	WTiBP9-	Gid8	UNKNOWN	FAM	NFQ-MGB	27.6629	27.6184	0.0400557				FALSE	0.18573	TRUE	3	22		N
D12	WTiBP9-	Gid8	UNKNOWN	FAM	NFQ-MGB	27.5852	27.6184	0.0400557				FALSE	0.18573	TRUE	3	22		N
E1	WT+	Ranbp9	UNKNOWN	FAM	NFQ-MGB	27.201	27.0041	0.347074				FALSE	0.18573	TRUE	3	23		N
E2	WT+	Ranbp9	UNKNOWN	FAM	NFQ-MGB	27.208	27.0041	0.347074				FALSE	0.18573	TRUE	3	22		N
E3	WT+	Ranbp9	UNKNOWN	FAM	NFQ-MGB	26.6034	27.0041	0.347074				FALSE	0.18573	TRUE	3	22		Y
E4	WTiBP9+	Ranbp9	UNKNOWN	FAM	NFQ-MGB	22.8828	22.7584	0.121174				FALSE	0.18573	TRUE	3	18		N
E5	WTiBP9+	Ranbp9	UNKNOWN	FAM	NFQ-MGB	22.6407	22.7584	0.121174				FALSE	0.18573	TRUE	3	18		N
E6	WTiBP9+	Ranbp9	UNKNOWN	FAM	NFQ-MGB	22.7518	22.7584	0.121174				FALSE	0.18573	TRUE	3	18		N
E7	WTiBP10+	Ranbp9	UNKNOWN	FAM	NFQ-MGB	27.6556	27.4088	0.21591				FALSE	0.18573	TRUE	3	23		N
E8	WTiBP10+	Ranbp9	UNKNOWN	FAM	NFQ-MGB	27.2544	27.4088	0.21591				FALSE	0.18573	TRUE	3	22		N
E9	WTiBP10+	Ranbp9	UNKNOWN	FAM	NFQ-MGB	27.3166	27.4088	0.21591				FALSE	0.18573	TRUE	3	22		N
E10	WTiBP9+	Gid8	UNKNOWN	FAM	NFQ-MGB	27.7042	27.6693	0.0330335				FALSE	0.18573	TRUE	3	23		N
E11	WTiBP9+	Gid8	UNKNOWN	FAM	NFQ-MGB	27.6386	27.6693	0.0330335				FALSE	0.18573	TRUE	3	23		N
E12	WTiBP9+	Gid8	UNKNOWN	FAM	NFQ-MGB	27.665	27.6693	0.0330335				FALSE	0.18573	TRUE	3	23		N
F1	WT-	Ranbp10	UNKNOWN	FAM	NFQ-MGB	29.9898	29.9542	0.0541311				FALSE	0.215894	TRUE	3	25		N
F2	WT-	Ranbp10	UNKNOWN	FAM	NFQ-MGB	29.9809	29.9542	0.0541311				FALSE	0.215894	TRUE	3	25		N
F3	WT-	Ranbp10	UNKNOWN	FAM	NFQ-MGB	29.8919	29.9542	0.0541311				FALSE	0.215894	TRUE	3	25		N
F4	WTiBP9-	Ranbp10	UNKNOWN	FAM	NFQ-MGB	29.6183	29.6183	0.00776197				FALSE	0.215894	TRUE	3	25		N
F5	WTiBP9-	Ranbp10	UNKNOWN	FAM	NFQ-MGB	29.6106	29.6183	0.00776197				FALSE	0.215894	TRUE	3	24		N
F6	WTiBP9-	Ranbp10	UNKNOWN	FAM	NFQ-MGB	29.6261	29.6183	0.00776197				FALSE	0.215894	TRUE	3	25		N
F7	WTiBP10-	Ranbp10	UNKNOWN	FAM	NFQ-MGB	29.72	29.6073	0.128723				FALSE	0.215894	TRUE	3	24		N
F8	WTiBP10-	Ranbp10	UNKNOWN	FAM	NFQ-MGB	29.467	29.6073	0.128723				FALSE	0.215894	TRUE	3	24		N
F9	WTiBP10-	Ranbp10	UNKNOWN	FAM	NFQ-MGB	29.6348	29.6073	0.128723				FALSE	0.215894	TRUE	3	24		N
F10	WTiBP10-	Gid8	UNKNOWN	FAM	NFQ-MGB	27.62	27.7408	0.110558				FALSE	0.18573	TRUE	3	23		N
F11	WTiBP10-	Gid8	UNKNOWN	FAM	NFQ-MGB	27.7651	27.7408	0.110558				FALSE	0.18573	TRUE	3	23		N
F12	WTiBP10-	Gid8	UNKNOWN	FAM	NFQ-MGB	27.8371	27.7408	0.110558				FALSE	0.18573	TRUE	3	22		N
G1	WT+	Ranbp10	UNKNOWN	FAM	NFQ-MGB	29.9738	29.9065	0.126444				FALSE	0.215894	TRUE	3	25		N
G2	WT+	Ranbp10	UNKNOWN	FAM	NFQ-MGB	29.9851	29.9065	0.126444				FALSE	0.215894	TRUE	3	24		N
G3	WT+	Ranbp10	UNKNOWN	FAM	NFQ-MGB	29.7606	29.9065	0.126444				FALSE	0.215894	TRUE	3	24		N
G4	WTiBP9+	Ranbp10	UNKNOWN	FAM	NFQ-MGB	29.8099	29.5465	0.279062				FALSE	0.215894	TRUE	3	24		N
G5	WTiBP9+	Ranbp10	UNKNOWN	FAM	NFQ-MGB	29.5755	29.5465	0.279062				FALSE	0.215894	TRUE	3	24		N
G6	WTiBP9+	Ranbp10	UNKNOWN	FAM	NFQ-MGB	29.254	29.5465	0.279062				FALSE	0.215894	TRUE	3	24		N
G7	WTiBP10+	Ranbp10	UNKNOWN	FAM	NFQ-MGB	24.3055	24.3305	0.0217687				FALSE	0.215894	TRUE	3	19		N
G8	WTiBP10+	Ranbp10	UNKNOWN	FAM	NFQ-MGB	24.3449	24.3305	0.0217687				FALSE	0.215894	TRUE	3	19		N
G9	WTiBP10+	Ranbp10	UNKNOWN	FAM	NFQ-MGB	24.3412	24.3305	0.0217687				FALSE	0.215894	TRUE	3	19		N
G10	WTiBP10+	Gid8	UNKNOWN	FAM	NFQ-MGB	27.6816	27.6338	0.0632235				FALSE	0.18573	TRUE	3	23		N
G11	WTiBP10+	Gid8	UNKNOWN	FAM	NFQ-MGB	27.6576	27.6338	0.0632235				FALSE	0.18573	TRUE	3	23		N
G12	WTiBP10+	Gid8	UNKNOWN	FAM	NFQ-MGB	27.5621	27.6338	0.0632235				FALSE	0.18573	TRUE	3	22		N
H1																		N
H2																		N
H3																		N
H4	WT+	Armc8	UNKNOWN	FAM	NFQ-MGB	29.5313	29.3909	0.123796				FALSE	0.306722	TRUE	3	23		N
H5	WT+	Armc8	UNKNOWN	FAM	NFQ-MGB	29.3439	29.3909	0.123796				FALSE	0.306722	TRUE	3	23		N
H6	WT+	Armc8	UNKNOWN	FAM	NFQ-MGB	29.2975	29.3909	0.123796				FALSE	0.306722	TRUE	3	24		N
H7	WTiBP9+	Armc8	UNKNOWN	FAM	NFQ-MGB	29.7883	29.6704	0.145191				FALSE	0.306722	TRUE	3	24		N
H8	WTiBP9+	Armc8	UNKNOWN	FAM	NFQ-MGB	29.5082	29.6704	0.145191				FALSE	0.306722	TRUE	3	24		N
H9	WTiBP9+	Armc8	UNKNOWN	FAM	NFQ-MGB	29.7146	29.6704	0.145191				FALSE	0.306722	TRUE	3	24		N
H10	WTiBP10+	Armc8	UNKNOWN	FAM	NFQ-MGB	29.7071	29.5841	0.141695				FALSE	0.306722	TRUE	3	24		N
H11	WTiBP10+	Armc8	UNKNOWN	FAM	NFQ-MGB	29.6162	29.5841	0.141695				FALSE	0.306722	TRUE	3	24		N
H12	WTiBP10+	Armc8	UNKNOWN	FAM	NFQ-MGB	29.4292	29.5841	0.141695				FALSE	0.306722	TRUE	3	24		N

## Sheet: 10-11-22_2
Block Type	96well
Chemistry	TAQMAN
Experiment File Name	C:\Applied Biosystems\StepOne Software v2.3\experiments\Coppola\Yasuko\A549 inducibles10112022_2.eds
Experiment Run End Time	2022-10-11 11:56:15 AM EDT
Instrument Type	steponeplus
Passive Reference	ROX
Well	Sample Name	Target Name	Task	Reporter	Quencher	Cт	Cт Mean	Cт SD	Quantity	Quantity Mean	Quantity SD	Automatic Ct Threshold	Ct Threshold	Automatic Baseline	Baseline Start	Baseline End	Comments	HIGHSD	OUTLIERRG
A1																		N	N
A2																		N	N
A3																		N	N
A4	WT-	Rmnd5a	UNKNOWN	FAM	NFQ-MGB	29.6384	29.36	0.295295				FALSE	0.216106	TRUE	3	25		N	N
A5	WT-	Rmnd5a	UNKNOWN	FAM	NFQ-MGB	29.3913	29.36	0.295295				FALSE	0.216106	TRUE	3	24		N	N
A6	WT-	Rmnd5a	UNKNOWN	FAM	NFQ-MGB	29.0503	29.36	0.295295				FALSE	0.216106	TRUE	3	24		N	N
A7	WTiBP9-	Rmnd5a	UNKNOWN	FAM	NFQ-MGB	29.4845	29.2788	0.179412				FALSE	0.216106	TRUE	3	24		N	N
A8	WTiBP9-	Rmnd5a	UNKNOWN	FAM	NFQ-MGB	29.1969	29.2788	0.179412				FALSE	0.216106	TRUE	3	24		N	N
A9	WTiBP9-	Rmnd5a	UNKNOWN	FAM	NFQ-MGB	29.1548	29.2788	0.179412				FALSE	0.216106	TRUE	3	24		N	N
A10	WTiBP10-	Rmnd5a	UNKNOWN	FAM	NFQ-MGB	29.4698	29.3865	0.0727627				FALSE	0.216106	TRUE	3	24		N	N
A11	WTiBP10-	Rmnd5a	UNKNOWN	FAM	NFQ-MGB	29.3541	29.3865	0.0727627				FALSE	0.216106	TRUE	3	25		N	N
A12	WTiBP10-	Rmnd5a	UNKNOWN	FAM	NFQ-MGB	29.3356	29.3865	0.0727627				FALSE	0.216106	TRUE	3	25		N	N
B1	WT-	Gapdh	UNKNOWN	FAM	NFQ-MGB	19.8858	20.0481	0.141367				FALSE	0.197943	TRUE	3	14		N	N
B2	WT-	Gapdh	UNKNOWN	FAM	NFQ-MGB	20.1444	20.0481	0.141367				FALSE	0.197943	TRUE	3	15		N	N
B3	WT-	Gapdh	UNKNOWN	FAM	NFQ-MGB	20.114	20.0481	0.141367				FALSE	0.197943	TRUE	3	15		N	N
B4	WTiBP9-	Gapdh	UNKNOWN	FAM	NFQ-MGB	20.4194	20.3011	0.103332				FALSE	0.197943	TRUE	3	15		N	N
B5	WTiBP9-	Gapdh	UNKNOWN	FAM	NFQ-MGB	20.2284	20.3011	0.103332				FALSE	0.197943	TRUE	3	15		N	N
B6	WTiBP9-	Gapdh	UNKNOWN	FAM	NFQ-MGB	20.2555	20.3011	0.103332				FALSE	0.197943	TRUE	3	15		N	N
B7	WTiBP10-	Gapdh	UNKNOWN	FAM	NFQ-MGB	20.2625	20.1879	0.06743				FALSE	0.197943	TRUE	3	15		N	N
B8	WTiBP10-	Gapdh	UNKNOWN	FAM	NFQ-MGB	20.1699	20.1879	0.06743				FALSE	0.197943	TRUE	3	15		N	N
B9	WTiBP10-	Gapdh	UNKNOWN	FAM	NFQ-MGB	20.1313	20.1879	0.06743				FALSE	0.197943	TRUE	3	15		N	N
B10	WT-	Gid4	UNKNOWN	FAM	NFQ-MGB	29.3858	29.3908	0.0244627				FALSE	0.189443	TRUE	3	24		N	N
B11	WT-	Gid4	UNKNOWN	FAM	NFQ-MGB	29.4173	29.3908	0.0244627				FALSE	0.189443	TRUE	3	25		N	N
B12	WT-	Gid4	UNKNOWN	FAM	NFQ-MGB	29.3692	29.3908	0.0244627				FALSE	0.189443	TRUE	3	24		N	N
C1	WT+	Gapdh	UNKNOWN	FAM	NFQ-MGB	20.3931	20.455	0.147946				FALSE	0.197943	TRUE	3	15		N	N
C2	WT+	Gapdh	UNKNOWN	FAM	NFQ-MGB	20.6238	20.455	0.147946				FALSE	0.197943	TRUE	3	16		N	N
C3	WT+	Gapdh	UNKNOWN	FAM	NFQ-MGB	20.348	20.455	0.147946				FALSE	0.197943	TRUE	3	15		N	N
C4	WTiBP9+	Gapdh	UNKNOWN	FAM	NFQ-MGB	20.4217	20.2716	0.193505				FALSE	0.197943	TRUE	3	16		N	N
C5	WTiBP9+	Gapdh	UNKNOWN	FAM	NFQ-MGB	20.3398	20.2716	0.193505				FALSE	0.197943	TRUE	3	15		N	N
C6	WTiBP9+	Gapdh	UNKNOWN	FAM	NFQ-MGB	20.0532	20.2716	0.193505				FALSE	0.197943	TRUE	3	15		N	N
C7	WTiBP10+	Gapdh	UNKNOWN	FAM	NFQ-MGB	20.1721	20.4478	0.510916				FALSE	0.197943	TRUE	3	15		Y	N
C8	WTiBP10+	Gapdh	UNKNOWN	FAM	NFQ-MGB	20.1338	20.4478	0.510916				FALSE	0.197943	TRUE	3	15		Y	N
C9	WTiBP10+	Gapdh	UNKNOWN	FAM	NFQ-MGB	21.0373	20.4478	0.510916				FALSE	0.197943	TRUE	3	16		Y	N
C10	WT+	Gid4	UNKNOWN	FAM	NFQ-MGB	29.3393	29.3179	0.0229431				FALSE	0.189443	TRUE	3	25		N	N
C11	WT+	Gid4	UNKNOWN	FAM	NFQ-MGB	29.2937	29.3179	0.0229431				FALSE	0.189443	TRUE	3	24		N	N
C12	WT+	Gid4	UNKNOWN	FAM	NFQ-MGB	29.3208	29.3179	0.0229431				FALSE	0.189443	TRUE	3	24		N	N
D1	WT-	Maea	UNKNOWN	FAM	NFQ-MGB	28.073	27.9816	0.088426				FALSE	0.206825	TRUE	3	22		N	N
D2	WT-	Maea	UNKNOWN	FAM	NFQ-MGB	27.8965	27.9816	0.088426				FALSE	0.206825	TRUE	3	22		N	N
D3	WT-	Maea	UNKNOWN	FAM	NFQ-MGB	27.9752	27.9816	0.088426				FALSE	0.206825	TRUE	3	23		N	N
D4	WTiBP9-	Maea	UNKNOWN	FAM	NFQ-MGB	27.8454	27.8578	0.0844226				FALSE	0.206825	TRUE	3	23		N	N
D5	WTiBP9-	Maea	UNKNOWN	FAM	NFQ-MGB	27.9477	27.8578	0.0844226				FALSE	0.206825	TRUE	3	23		N	N
D6	WTiBP9-	Maea	UNKNOWN	FAM	NFQ-MGB	27.7803	27.8578	0.0844226				FALSE	0.206825	TRUE	3	21		N	N
D7	WTiBP10-	Maea	UNKNOWN	FAM	NFQ-MGB	28.1359	28.0362	0.0954372				FALSE	0.206825	TRUE	3	23		N	N
D8	WTiBP10-	Maea	UNKNOWN	FAM	NFQ-MGB	28.027	28.0362	0.0954372				FALSE	0.206825	TRUE	3	23		N	N
D9	WTiBP10-	Maea	UNKNOWN	FAM	NFQ-MGB	27.9457	28.0362	0.0954372				FALSE	0.206825	TRUE	3	22		N	N
D10	WTiBP9-	Gid4	UNKNOWN	FAM	NFQ-MGB	29.0561	28.9906	0.0591286				FALSE	0.189443	TRUE	3	24		N	N
D11	WTiBP9-	Gid4	UNKNOWN	FAM	NFQ-MGB	28.9744	28.9906	0.0591286				FALSE	0.189443	TRUE	3	24		N	N
D12	WTiBP9-	Gid4	UNKNOWN	FAM	NFQ-MGB	28.9412	28.9906	0.0591286				FALSE	0.189443	TRUE	3	24		N	N
E1	WT+	Maea	UNKNOWN	FAM	NFQ-MGB	28.1079	27.85	0.345031				FALSE	0.206825	TRUE	3	22		N	N
E2	WT+	Maea	UNKNOWN	FAM	NFQ-MGB	27.9841	27.85	0.345031				FALSE	0.206825	TRUE	3	23		N	N
E3	WT+	Maea	UNKNOWN	FAM	NFQ-MGB	27.4581	27.85	0.345031				FALSE	0.206825	TRUE	3	23		N	N
E4	WTiBP9+	Maea	UNKNOWN	FAM	NFQ-MGB	28.0267	27.87	0.188477				FALSE	0.206825	TRUE	3	23		N	N
E5	WTiBP9+	Maea	UNKNOWN	FAM	NFQ-MGB	27.6609	27.87	0.188477				FALSE	0.206825	TRUE	3	23		N	N
E6	WTiBP9+	Maea	UNKNOWN	FAM	NFQ-MGB	27.9225	27.87	0.188477				FALSE	0.206825	TRUE	3	22		N	N
E7	WTiBP10+	Maea	UNKNOWN	FAM	NFQ-MGB	28.5848	28.1962	0.336706				FALSE	0.206825	TRUE	3	23		N	N
E8	WTiBP10+	Maea	UNKNOWN	FAM	NFQ-MGB	28.013	28.1962	0.336706				FALSE	0.206825	TRUE	3	23		N	N
E9	WTiBP10+	Maea	UNKNOWN	FAM	NFQ-MGB	27.9907	28.1962	0.336706				FALSE	0.206825	TRUE	3	23		N	N
E10	WTiBP9+	Gid4	UNKNOWN	FAM	NFQ-MGB	29.0864	29.0342	0.0452894				FALSE	0.189443	TRUE	3	24		N	N
E11	WTiBP9+	Gid4	UNKNOWN	FAM	NFQ-MGB	29.0065	29.0342	0.0452894				FALSE	0.189443	TRUE	3	24		N	N
E12	WTiBP9+	Gid4	UNKNOWN	FAM	NFQ-MGB	29.0096	29.0342	0.0452894				FALSE	0.189443	TRUE	3	24		N	N
F1	WT-	Mkln1	UNKNOWN	FAM	NFQ-MGB	27.7317	27.7612	0.0286144				FALSE	0.216106	TRUE	3	23		N	N
F2	WT-	Mkln1	UNKNOWN	FAM	NFQ-MGB	27.7631	27.7612	0.0286144				FALSE	0.216106	TRUE	3	23		N	N
F3	WT-	Mkln1	UNKNOWN	FAM	NFQ-MGB	27.7888	27.7612	0.0286144				FALSE	0.216106	TRUE	3	23		N	N
F4	WTiBP9-	Mkln1	UNKNOWN	FAM	NFQ-MGB	27.4	27.5156	0.10316				FALSE	0.216106	TRUE	3	22		N	N
F5	WTiBP9-	Mkln1	UNKNOWN	FAM	NFQ-MGB	27.5983	27.5156	0.10316				FALSE	0.216106	TRUE	3	22		N	N
F6	WTiBP9-	Mkln1	UNKNOWN	FAM	NFQ-MGB	27.5484	27.5156	0.10316				FALSE	0.216106	TRUE	3	22		N	N
F7	WTiBP10-	Mkln1	UNKNOWN	FAM	NFQ-MGB	27.5072	27.4763	0.0961648				FALSE	0.216106	TRUE	3	23		N	N
F8	WTiBP10-	Mkln1	UNKNOWN	FAM	NFQ-MGB	27.3685	27.4763	0.0961648				FALSE	0.216106	TRUE	3	22		N	N
F9	WTiBP10-	Mkln1	UNKNOWN	FAM	NFQ-MGB	27.5533	27.4763	0.0961648				FALSE	0.216106	TRUE	3	22		N	N
F10	WTiBP10-	Gid4	UNKNOWN	FAM	NFQ-MGB	29.005	29.1413	0.229679				FALSE	0.189443	TRUE	3	24		N	N
F11	WTiBP10-	Gid4	UNKNOWN	FAM	NFQ-MGB	29.4065	29.1413	0.229679				FALSE	0.189443	TRUE	3	25		N	Y
F12	WTiBP10-	Gid4	UNKNOWN	FAM	NFQ-MGB	29.0124	29.1413	0.229679				FALSE	0.189443	TRUE	3	24		N	N
G1	WT+	Mkln1	UNKNOWN	FAM	NFQ-MGB	27.3414	27.2564	0.0901583				FALSE	0.216106	TRUE	3	22		N	N
G2	WT+	Mkln1	UNKNOWN	FAM	NFQ-MGB	27.2658	27.2564	0.0901583				FALSE	0.216106	TRUE	3	22		N	N
G3	WT+	Mkln1	UNKNOWN	FAM	NFQ-MGB	27.1619	27.2564	0.0901583				FALSE	0.216106	TRUE	3	21		N	N
G4	WTiBP9+	Mkln1	UNKNOWN	FAM	NFQ-MGB	27.6077	27.4891	0.136414				FALSE	0.216106	TRUE	3	21		N	N
G5	WTiBP9+	Mkln1	UNKNOWN	FAM	NFQ-MGB	27.5194	27.4891	0.136414				FALSE	0.216106	TRUE	3	22		N	N
G6	WTiBP9+	Mkln1	UNKNOWN	FAM	NFQ-MGB	27.34	27.4891	0.136414				FALSE	0.216106	TRUE	3	22		N	N
G7	WTiBP10+	Mkln1	UNKNOWN	FAM	NFQ-MGB	27.5036	27.4655	0.0332848				FALSE	0.216106	TRUE	3	23		N	N
G8	WTiBP10+	Mkln1	UNKNOWN	FAM	NFQ-MGB	27.4507	27.4655	0.0332848				FALSE	0.216106	TRUE	3	22		N	N
G9	WTiBP10+	Mkln1	UNKNOWN	FAM	NFQ-MGB	27.4422	27.4655	0.0332848				FALSE	0.216106	TRUE	3	21		N	N
G10	WTiBP10+	Gid4	UNKNOWN	FAM	NFQ-MGB	29.3207	29.2839	0.0497977				FALSE	0.189443	TRUE	3	25		N	N
G11	WTiBP10+	Gid4	UNKNOWN	FAM	NFQ-MGB	29.2272	29.2839	0.0497977				FALSE	0.189443	TRUE	3	24		N	N
G12	WTiBP10+	Gid4	UNKNOWN	FAM	NFQ-MGB	29.3037	29.2839	0.0497977				FALSE	0.189443	TRUE	3	24		N	N
H1																		N	N
H2																		N	N
H3																		N	N
H4	WT+	Rmnd5a	UNKNOWN	FAM	NFQ-MGB	29.5626	29.1715	0.491197				FALSE	0.216106	TRUE	3	25		N	N
H5	WT+	Rmnd5a	UNKNOWN	FAM	NFQ-MGB	29.3317	29.1715	0.491197				FALSE	0.216106	TRUE	3	25		N	N
H6	WT+	Rmnd5a	UNKNOWN	FAM	NFQ-MGB	28.6202	29.1715	0.491197				FALSE	0.216106	TRUE	3	23		N	N
H7	WTiBP9+	Rmnd5a	UNKNOWN	FAM	NFQ-MGB	29.5512	29.3441	0.179606				FALSE	0.216106	TRUE	3	24		N	N
H8	WTiBP9+	Rmnd5a	UNKNOWN	FAM	NFQ-MGB	29.2501	29.3441	0.179606				FALSE	0.216106	TRUE	3	24		N	N
H9	WTiBP9+	Rmnd5a	UNKNOWN	FAM	NFQ-MGB	29.2311	29.3441	0.179606				FALSE	0.216106	TRUE	3	24		N	N
H10	WTiBP10+	Rmnd5a	UNKNOWN	FAM	NFQ-MGB	29.4509	29.4892	0.0414929				FALSE	0.216106	TRUE	3	24		N	N
H11	WTiBP10+	Rmnd5a	UNKNOWN	FAM	NFQ-MGB	29.5333	29.4892	0.0414929				FALSE	0.216106	TRUE	3	24		N	N
H12	WTiBP10+	Rmnd5a	UNKNOWN	FAM	NFQ-MGB	29.4836	29.4892	0.0414929				FALSE	0.216106	TRUE	3	24		N	N

## Sheet: 10-12-22
Block Type	96well
Chemistry	TAQMAN
Experiment File Name	C:\Applied Biosystems\StepOne Software v2.3\experiments\Coppola\Yasuko\A549 inducibles and KO 10122022.eds
Experiment Run End Time	2022-10-12 18:11:09 PM EDT
Instrument Type	steponeplus
Passive Reference	ROX
Well	Sample Name	Target Name	Task	Reporter	Quencher	Cт	Cт Mean	Cт SD	Quantity	Quantity Mean	Quantity SD	Automatic Ct Threshold	Ct Threshold	Automatic Baseline	Baseline Start	Baseline End	Comments	HIGHSD	OUTLIERRG	EXPFAIL
A1	DKO	Gapdh	UNKNOWN	FAM	NFQ-MGB	18.43	17.8354	0.53761				FALSE	0.18573	TRUE	3	13		Y	N	N
A2	DKO	Gapdh	UNKNOWN	FAM	NFQ-MGB	17.6924	17.8354	0.53761				FALSE	0.18573	TRUE	3	12		Y	N	N
A3	DKO	Gapdh	UNKNOWN	FAM	NFQ-MGB	17.3837	17.8354	0.53761				FALSE	0.18573	TRUE	3	11		Y	N	N
A4	WT	Gapdh	UNKNOWN	FAM	NFQ-MGB	17.3663	17.3656	0.000617701				FALSE	0.18573	TRUE	3	12		N	N	N
A5	WT	Gapdh	UNKNOWN	FAM	NFQ-MGB	17.3655	17.3656	0.000617701				FALSE	0.18573	TRUE	3	12		N	N	N
A6	WT	Gapdh	UNKNOWN	FAM	NFQ-MGB	17.365	17.3656	0.000617701				FALSE	0.18573	TRUE	3	12		N	N	N
A7	BP9KO	Gapdh	UNKNOWN	FAM	NFQ-MGB	17.3424	17.2752	0.0647879				FALSE	0.18573	TRUE	3	12		N	N	N
A8	BP9KO	Gapdh	UNKNOWN	FAM	NFQ-MGB	17.2131	17.2752	0.0647879				FALSE	0.18573	TRUE	3	11		N	N	N
A9	BP9KO	Gapdh	UNKNOWN	FAM	NFQ-MGB	17.2703	17.2752	0.0647879				FALSE	0.18573	TRUE	3	12		N	N	N
A10	BP10KO	Gapdh	UNKNOWN	FAM	NFQ-MGB	17.3391	17.319	0.0916938				FALSE	0.18573	TRUE	3	11		N	N	N
A11	BP10KO	Gapdh	UNKNOWN	FAM	NFQ-MGB	17.219	17.319	0.0916938				FALSE	0.18573	TRUE	3	11		N	N	N
A12	BP10KO	Gapdh	UNKNOWN	FAM	NFQ-MGB	17.399	17.319	0.0916938				FALSE	0.18573	TRUE	3	12		N	N	N
B1	WT-	Gapdh	UNKNOWN	FAM	NFQ-MGB	20.1873	20.1104	0.212736				FALSE	0.18573	TRUE	3	15		N	N	N
B2	WT-	Gapdh	UNKNOWN	FAM	NFQ-MGB	20.274	20.1104	0.212736				FALSE	0.18573	TRUE	3	15		N	N	N
B3	WT-	Gapdh	UNKNOWN	FAM	NFQ-MGB	19.8699	20.1104	0.212736				FALSE	0.18573	TRUE	3	14		N	N	N
B4	WTiBP9-	Gapdh	UNKNOWN	FAM	NFQ-MGB	20.3256	20.1845	0.122587				FALSE	0.18573	TRUE	3	15		N	N	N
B5	WTiBP9-	Gapdh	UNKNOWN	FAM	NFQ-MGB	20.1242	20.1845	0.122587				FALSE	0.18573	TRUE	3	15		N	N	N
B6	WTiBP9-	Gapdh	UNKNOWN	FAM	NFQ-MGB	20.1038	20.1845	0.122587				FALSE	0.18573	TRUE	3	15		N	N	N
B7	WTiBP10-	Gapdh	UNKNOWN	FAM	NFQ-MGB	20.0655	20.0332	0.0349778				FALSE	0.18573	TRUE	3	15		N	N	N
B8	WTiBP10-	Gapdh	UNKNOWN	FAM	NFQ-MGB	20.0381	20.0332	0.0349778				FALSE	0.18573	TRUE	3	15		N	N	N
B9	WTiBP10-	Gapdh	UNKNOWN	FAM	NFQ-MGB	19.9961	20.0332	0.0349778				FALSE	0.18573	TRUE	3	15		N	N	N
B10	WT-	Ypel5	UNKNOWN	FAM	NFQ-MGB	34.7248	34.8979	0.155907				FALSE	0.18573	TRUE	3	29		N	N	N
B11	WT-	Ypel5	UNKNOWN	FAM	NFQ-MGB	34.9419	34.8979	0.155907				FALSE	0.18573	TRUE	3	30		N	N	N
B12	WT-	Ypel5	UNKNOWN	FAM	NFQ-MGB	35.0271	34.8979	0.155907				FALSE	0.18573	TRUE	3	30		N	N	N
C1	WT+	Gapdh	UNKNOWN	FAM	NFQ-MGB	20.3929	20.3868	0.248867				FALSE	0.18573	TRUE	3	16		N	N	N
C2	WT+	Gapdh	UNKNOWN	FAM	NFQ-MGB	20.6326	20.3868	0.248867				FALSE	0.18573	TRUE	3	15		N	N	N
C3	WT+	Gapdh	UNKNOWN	FAM	NFQ-MGB	20.135	20.3868	0.248867				FALSE	0.18573	TRUE	3	15		N	N	N
C4	WTiBP9+	Gapdh	UNKNOWN	FAM	NFQ-MGB	20.4348	20.3169	0.127651				FALSE	0.18573	TRUE	3	16		N	N	N
C5	WTiBP9+	Gapdh	UNKNOWN	FAM	NFQ-MGB	20.3346	20.3169	0.127651				FALSE	0.18573	TRUE	3	15		N	N	N
C6	WTiBP9+	Gapdh	UNKNOWN	FAM	NFQ-MGB	20.1813	20.3169	0.127651				FALSE	0.18573	TRUE	3	15		N	N	N
C7	WTiBP10+	Gapdh	UNKNOWN	FAM	NFQ-MGB	20.0461	20.3406	0.52545				FALSE	0.18573	TRUE	3	15		Y	N	N
C8	WTiBP10+	Gapdh	UNKNOWN	FAM	NFQ-MGB	20.0284	20.3406	0.52545				FALSE	0.18573	TRUE	3	15		Y	N	N
C9	WTiBP10+	Gapdh	UNKNOWN	FAM	NFQ-MGB	20.9472	20.3406	0.52545				FALSE	0.18573	TRUE	3	16		Y	Y	N
C10	WT+	Ypel5	UNKNOWN	FAM	NFQ-MGB	35.0873	34.7868	0.283352				FALSE	0.18573	TRUE	3	29		N	N	N
C11	WT+	Ypel5	UNKNOWN	FAM	NFQ-MGB	34.5244	34.7868	0.283352				FALSE	0.18573	TRUE	3	29		N	N	N
C12	WT+	Ypel5	UNKNOWN	FAM	NFQ-MGB	34.7487	34.7868	0.283352				FALSE	0.18573	TRUE	3	30		N	N	N
D1	WT-	Rmnd5b	UNKNOWN	FAM	NFQ-MGB	27.3378	27.3033	0.0314716				FALSE	0.195285	TRUE	3	22		N	N	N
D2	WT-	Rmnd5b	UNKNOWN	FAM	NFQ-MGB	27.2761	27.3033	0.0314716				FALSE	0.195285	TRUE	3	22		N	N	N
D3	WT-	Rmnd5b	UNKNOWN	FAM	NFQ-MGB	27.2959	27.3033	0.0314716				FALSE	0.195285	TRUE	3	22		N	N	N
D4	WTiBP9-	Rmnd5b	UNKNOWN	FAM	NFQ-MGB	27.389	27.5199	0.129743				FALSE	0.195285	TRUE	3	22		N	N	N
D5	WTiBP9-	Rmnd5b	UNKNOWN	FAM	NFQ-MGB	27.5222	27.5199	0.129743				FALSE	0.195285	TRUE	3	23		N	N	N
D6	WTiBP9-	Rmnd5b	UNKNOWN	FAM	NFQ-MGB	27.6484	27.5199	0.129743				FALSE	0.195285	TRUE	3	23		N	N	N
D7	WTiBP10-	Rmnd5b	UNKNOWN	FAM	NFQ-MGB	27.4511	27.3934	0.0692854				FALSE	0.195285	TRUE	3	23		N	N	N
D8	WTiBP10-	Rmnd5b	UNKNOWN	FAM	NFQ-MGB	27.4126	27.3934	0.0692854				FALSE	0.195285	TRUE	3	22		N	N	N
D9	WTiBP10-	Rmnd5b	UNKNOWN	FAM	NFQ-MGB	27.3166	27.3934	0.0692854				FALSE	0.195285	TRUE	3	22		N	N	N
D10	WTiBP9-	Ypel5	UNKNOWN	FAM	NFQ-MGB	35.3431	35.3637	0.123392				FALSE	0.18573	TRUE	3	30		N	N	N
D11	WTiBP9-	Ypel5	UNKNOWN	FAM	NFQ-MGB	35.2519	35.3637	0.123392				FALSE	0.18573	TRUE	3	30		N	N	N
D12	WTiBP9-	Ypel5	UNKNOWN	FAM	NFQ-MGB	35.4961	35.3637	0.123392				FALSE	0.18573	TRUE	3	31		N	N	N
E1	WT+	Rmnd5b	UNKNOWN	FAM	NFQ-MGB	27.2586	27.1312	0.27103				FALSE	0.195285	TRUE	3	22		N	N	N
E2	WT+	Rmnd5b	UNKNOWN	FAM	NFQ-MGB	27.315	27.1312	0.27103				FALSE	0.195285	TRUE	3	22		N	N	N
E3	WT+	Rmnd5b	UNKNOWN	FAM	NFQ-MGB	26.8199	27.1312	0.27103				FALSE	0.195285	TRUE	3	21		N	N	N
E4	WTiBP9+	Rmnd5b	UNKNOWN	FAM	NFQ-MGB	27.5202	27.4006	0.133889				FALSE	0.195285	TRUE	3	23		N	N	N
E5	WTiBP9+	Rmnd5b	UNKNOWN	FAM	NFQ-MGB	27.2559	27.4006	0.133889				FALSE	0.195285	TRUE	3	22		N	N	N
E6	WTiBP9+	Rmnd5b	UNKNOWN	FAM	NFQ-MGB	27.4257	27.4006	0.133889				FALSE	0.195285	TRUE	3	23		N	N	N
E7	WTiBP10+	Rmnd5b	UNKNOWN	FAM	NFQ-MGB	27.8867	27.4992	0.33816				FALSE	0.195285	TRUE	3	23		N	N	N
E8	WTiBP10+	Rmnd5b	UNKNOWN	FAM	NFQ-MGB	27.3473	27.4992	0.33816				FALSE	0.195285	TRUE	3	23		N	N	N
E9	WTiBP10+	Rmnd5b	UNKNOWN	FAM	NFQ-MGB	27.2636	27.4992	0.33816				FALSE	0.195285	TRUE	3	22		N	N	N
E10	WTiBP9+	Ypel5	UNKNOWN	FAM	NFQ-MGB	35.6306	35.4819	0.257553				FALSE	0.18573	TRUE	3	31		N	N	N
E11	WTiBP9+	Ypel5	UNKNOWN	FAM	NFQ-MGB	35.6306	35.4819	0.257553				FALSE	0.18573	TRUE	3	30		N	N	N
E12	WTiBP9+	Ypel5	UNKNOWN	FAM	NFQ-MGB	35.1845	35.4819	0.257553				FALSE	0.18573	TRUE	3	30		N	Y	N
F1	WT-	Wdr26	UNKNOWN	FAM	NFQ-MGB	27.8933	27.8812	0.0434867				FALSE	0.195285	TRUE	3	22		N	N	N
F2	WT-	Wdr26	UNKNOWN	FAM	NFQ-MGB	27.833	27.8812	0.0434867				FALSE	0.195285	TRUE	3	23		N	N	N
F3	WT-	Wdr26	UNKNOWN	FAM	NFQ-MGB	27.9174	27.8812	0.0434867				FALSE	0.195285	TRUE	3	23		N	N	N
F4	WTiBP9-	Wdr26	UNKNOWN	FAM	NFQ-MGB	27.6498	27.6959	0.0554229				FALSE	0.195285	TRUE	3	23		N	N	N
F5	WTiBP9-	Wdr26	UNKNOWN	FAM	NFQ-MGB	27.7574	27.6959	0.0554229				FALSE	0.195285	TRUE	3	23		N	N	N
F6	WTiBP9-	Wdr26	UNKNOWN	FAM	NFQ-MGB	27.6804	27.6959	0.0554229				FALSE	0.195285	TRUE	3	23		N	N	N
F7	WTiBP10-	Wdr26	UNKNOWN	FAM	NFQ-MGB	27.7299	27.7212	0.0427994				FALSE	0.195285	TRUE	3	23		N	N	N
F8	WTiBP10-	Wdr26	UNKNOWN	FAM	NFQ-MGB	27.6748	27.7212	0.0427994				FALSE	0.195285	TRUE	3	23		N	N	N
F9	WTiBP10-	Wdr26	UNKNOWN	FAM	NFQ-MGB	27.759	27.7212	0.0427994				FALSE	0.195285	TRUE	3	22		N	N	N
F10	WTiBP10-	Ypel5	UNKNOWN	FAM	NFQ-MGB	35.0881	35.3731	0.255646				FALSE	0.18573	TRUE	3	30		N	N	N
F11	WTiBP10-	Ypel5	UNKNOWN	FAM	NFQ-MGB	35.4491	35.3731	0.255646				FALSE	0.18573	TRUE	3	31		N	N	N
F12	WTiBP10-	Ypel5	UNKNOWN	FAM	NFQ-MGB	35.5821	35.3731	0.255646				FALSE	0.18573	TRUE	3	30		N	N	N
G1	WT+	Wdr26	UNKNOWN	FAM	NFQ-MGB	27.5355	27.4499	0.0787441				FALSE	0.195285	TRUE	3	22		N	N	N
G2	WT+	Wdr26	UNKNOWN	FAM	NFQ-MGB	27.4337	27.4499	0.0787441				FALSE	0.195285	TRUE	3	22		N	N	N
G3	WT+	Wdr26	UNKNOWN	FAM	NFQ-MGB	27.3806	27.4499	0.0787441				FALSE	0.195285	TRUE	3	22		N	N	N
G4	WTiBP9+	Wdr26	UNKNOWN	FAM	NFQ-MGB	27.7856	27.6479	0.129532				FALSE	0.195285	TRUE	3	23		N	N	N
G5	WTiBP9+	Wdr26	UNKNOWN	FAM	NFQ-MGB	27.6294	27.6479	0.129532				FALSE	0.195285	TRUE	3	22		N	N	N
G6	WTiBP9+	Wdr26	UNKNOWN	FAM	NFQ-MGB	27.5285	27.6479	0.129532				FALSE	0.195285	TRUE	3	22		N	N	N
G7	WTiBP10+	Wdr26	UNKNOWN	FAM	NFQ-MGB	27.7134	27.6945	0.0221258				FALSE	0.195285	TRUE	3	23		N	N	N
G8	WTiBP10+	Wdr26	UNKNOWN	FAM	NFQ-MGB	27.6701	27.6945	0.0221258				FALSE	0.195285	TRUE	3	23		N	N	N
G9	WTiBP10+	Wdr26	UNKNOWN	FAM	NFQ-MGB	27.7	27.6945	0.0221258				FALSE	0.195285	TRUE	3	23		N	N	N
G10	WTiBP10+	Ypel5	UNKNOWN	FAM	NFQ-MGB	34.8589	35.0155	0.16206				FALSE	0.18573	TRUE	3	30		N	N	N
G11	WTiBP10+	Ypel5	UNKNOWN	FAM	NFQ-MGB	35.1825	35.0155	0.16206				FALSE	0.18573	TRUE	3	30		N	N	N
G12	WTiBP10+	Ypel5	UNKNOWN	FAM	NFQ-MGB	35.0053	35.0155	0.16206				FALSE	0.18573	TRUE	3	30		N	N	N
H1	DKO	Ranbp10	UNKNOWN	FAM	NFQ-MGB	Undetermined	39.2402					FALSE	0.205331	TRUE	3	49		N	N	Y
H2	DKO	Ranbp10	UNKNOWN	FAM	NFQ-MGB	Undetermined	39.2402					FALSE	0.205331	TRUE	3	49		N	N	Y
H3	DKO	Ranbp10	UNKNOWN	FAM	NFQ-MGB	39.2402	39.2402					FALSE	0.205331	TRUE	3	34		N	N	N
H4	WT	Ranbp10	UNKNOWN	FAM	NFQ-MGB	26.9953	26.9351	0.0667429				FALSE	0.205331	TRUE	3	21		N	N	N
H5	WT	Ranbp10	UNKNOWN	FAM	NFQ-MGB	26.9467	26.9351	0.0667429				FALSE	0.205331	TRUE	3	21		N	N	N
H6	WT	Ranbp10	UNKNOWN	FAM	NFQ-MGB	26.8633	26.9351	0.0667429				FALSE	0.205331	TRUE	3	22		N	N	N
H7	BP9KO	Ranbp10	UNKNOWN	FAM	NFQ-MGB	26.7171	26.6418	0.117134				FALSE	0.205331	TRUE	3	21		N	N	N
H8	BP9KO	Ranbp10	UNKNOWN	FAM	NFQ-MGB	26.5068	26.6418	0.117134				FALSE	0.205331	TRUE	3	21		N	N	N
H9	BP9KO	Ranbp10	UNKNOWN	FAM	NFQ-MGB	26.7014	26.6418	0.117134				FALSE	0.205331	TRUE	3	22		N	N	N
H10	BP10KO	Ranbp10	UNKNOWN	FAM	NFQ-MGB	28.6275	28.7465	0.184044				FALSE	0.205331	TRUE	3	23		N	N	N
H11	BP10KO	Ranbp10	UNKNOWN	FAM	NFQ-MGB	28.6536	28.7465	0.184044				FALSE	0.205331	TRUE	3	23		N	N	N
H12	BP10KO	Ranbp10	UNKNOWN	FAM	NFQ-MGB	28.9585	28.7465	0.184044				FALSE	0.205331	TRUE	3	24		N	N	N
